# Supplementary material for: Organocatalytic CS2 insertion into epoxides in neat conditions: a straightforward approach for the efficient synthesis of Di- and tri-thiocarbonates
Source: Royal Society of Chemistry journal article supplement (doi:10.1039/d4cc05154h), 2024-12-23
Supplement: d4cc05154h1.pdf [file d4cc05154h1.pdf]

# APPENDIX

## ORGANOCATALYTIC CS<sub>2</sub> INSERTION INTO EPOXIDES IN NEAT CONDITIONS: A STRAIGHTFORWARD APPROACH FOR THE EFFICIENT SYNTHESIS OF DI- AND TRI-THIOCARBONATES

Marcos López-Aguilar,<sup>a</sup> Nicolás Ríos-Lombardía,<sup>a</sup> Miguel Gallegos,<sup>b</sup> Daniel Barrena-Espés,<sup>b</sup> Joaquín García-Álvarez,<sup>\*,a</sup> Carmen Concellón<sup>\*,a</sup> and Vicente del Amo<sup>\*,a</sup>

---

<sup>a</sup>Laboratorio de Química Sintética Sostenible (QuimSinSos), Departamento de Química Orgánica e Inorgánica, (IUQOEM), Centro de Innovación en Química Avanzada (ORFEO-CINQA), Facultad de Química, Universidad de Oviedo, E33071 Oviedo, Spain.

<sup>b</sup>Departamento de Química Física y Analítica, Facultad de Química, Universidad de Oviedo, E33071 Oviedo, Spain.

---

### **Contents**

|                                           |     |
|-------------------------------------------|-----|
| 1. Computational details.....             | 2   |
| 2. General reaction mechanism .....       | 4   |
| 3. Wavefunction analysis.....             | 9   |
| Nucleophilic attack to the oxirane .....  | 10  |
| Gas-Phase studies .....                   | 10  |
| Solvated studies .....                    | 42  |
| Nucleophilic attack to the Thiirane ..... | 75  |
| Solvated studies .....                    | 75  |
| 4. Optimized geometries .....             | 100 |

## 1. Computational details

All electronic structure calculations were conducted at the DFT level using Gaussian16, revision C.01. [1] The M06-2X Minnesota functional was employed in conjunction with the Karlsruhe (def2) basis sets as implemented in Gaussian16, chosen for its accurate description of common organic species involving non-covalent interactions and prominent charge separation. [2]

Geometry optimizations, frequency analyses, and wavefunction generation were performed at the M06-2X/def2-SVP level of theory. A single-point energy refinement was subsequently carried out at the M06-2X/def2-TZVP level to ensure a more accurate energy evaluation. The nature of the stationary points, unless otherwise stated, was determined as either local minima or first-order saddle points (for transition states) by examining the eigenvalues of the Hessian matrix. Likewise, the progress of chemical transformations was evaluated through Intrinsic Reaction Coordinate (IRC) calculations, using the Gaussian16 implementation. [1] The Local Quadratic Approximation (LQA) was employed to handle flat and fuzzy potential energy surfaces. Unless explicitly specified, all reactions were modeled under neat conditions (i.e., in the presence of CS<sub>2</sub>). Solvent effects were implicitly included for both energy and gradient evaluations using the SMD solvation model as implemented in Gaussian16. [1]

Wavefunction analyses were conducted on selected compounds and stationary points to elucidate the electron redistribution taking place throughout various reaction steps. These single-determinant wave functions were generated at the M06-2X/def2-SVP level of theory in the gas phase with Gaussian16. [1] Quantum Theory of Atoms in Molecules (QTAIM) calculations were then performed with the AIMAll [3] and PROMOLDEN [4] suites, using default integration grids.

All energies presented in the reaction profiles are reported as Gibbs free energies (373.15 K), computed at the M06-2X/def2-TZVP level, with corrections for translational entropy contributions following the Morokuma scheme. Visualization and molecular representations were done using Jmol [5] with default rendering options.

To mimic the reaction conditions, calculations were performed in the presence of various ionic species, including lithium chloride, choline chloride, and tetrabutylammonium chloride. However, due to the high computational cost of simulating the latter, we opted to use tetramethylammonium chloride as an equivalent system instead.

[1] Gaussian 16, Revision C.01, M. J. Frisch, G. W. Trucks, H. B. Schlegel, G. E. Scuseria, M. A. Robb, J. R. Cheeseman, G. Scalmani, V. Barone, G. A. Petersson, H. Nakatsuji, X. Li, M. Caricato, A. V. Marenich, J. Bloino, B. G. Janesko, R. Gomperts, B. Mennucci, H. P. Hratchian, J. V. Ortiz, A. F. Izmaylov, J. L. Sonnenberg, D. Williams-Young, F. Ding, F. Lipparini, F. Egidi, J. Goings, B. Peng, A. Petrone, T. Henderson, D. Ranasinghe, V. G. Zakrzewski, J. Gao, N. Rega, G. Zheng, W. Liang, M. Hada, M. Ehara, K. Toyota, R. Fukuda, J. Hasegawa, M. Ishida, T. Nakajima, Y. Honda, O. Kitao, H. Nakai, T. Vreven, K. Throssell, J. A. Montgomery, Jr., J. E. Peralta, F. Ogliaro, M. J. Bearpark, J. J. Heyd, E. N. Brothers, K. N. Kudin, V. N. Staroverov, T. A. Keith, R. Kobayashi, J. Normand, K. Raghavachari, A. P. Rendell, J. C. Burant, S. S. Iyengar, J. Tomasi, M. Cossi, J. M. Millam, M. Klene, C. Adamo, R. Cammi, J. W. Ochterski, R. L. Martin, K. Morokuma, O. Farkas, J. B. Foresman, and D. J. Fox, Gaussian, Inc., Wallingford CT, 2016.

[2] <https://pubs.acs.org/doi/abs/10.1021/jp408166m>

[3] AIMAll (Version 19.10.12), Todd A. Keith, TK Gristmill Software, Overland Park KS, USA, 2019 ([aim.tkgristmill.com](http://aim.tkgristmill.com)).

[4] PROMOLDEN: A QTAIM/IQA code. Available from the authors upon request by writing to [ampendas@uniovi.es](mailto:ampendas@uniovi.es).

[5] Jmol: an open-source Java viewer for chemical structures in 3D. <http://www.jmol.org/>.

[6] Bader, R. Atoms in Molecules: A Quantum Theory. International Series of Monographs on Chemistry (Oxford University Press, Oxford, 1990).

## 2. General reaction mechanism

The current section comprises the general reaction profile and mechanism for the formation of trithiocarbonates (TTC) starting from the corresponding oxiranes. For the sake of computational efficiency,  $\text{Li}^+$  was used a single-point charge counter cation of  $\text{CS}_2\text{Cl}^-$ .

### Formation of the Thiirane from the Oxirane: (S)/(R)-1a to 4-S/R

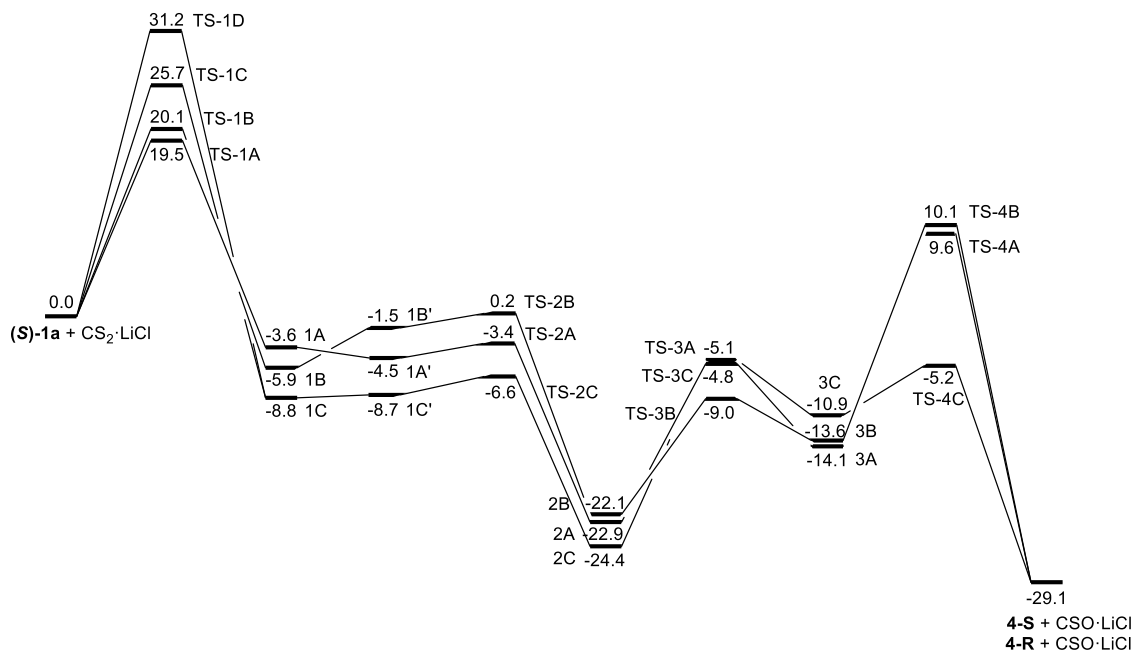

**Figure S1.** Reaction energy profile for the transformation of (S)-1a to 4-S/4-R. All energies are reported, relative to the reactant complex, as the Morokuma-corrected Gibbs free energies (373.15 K).

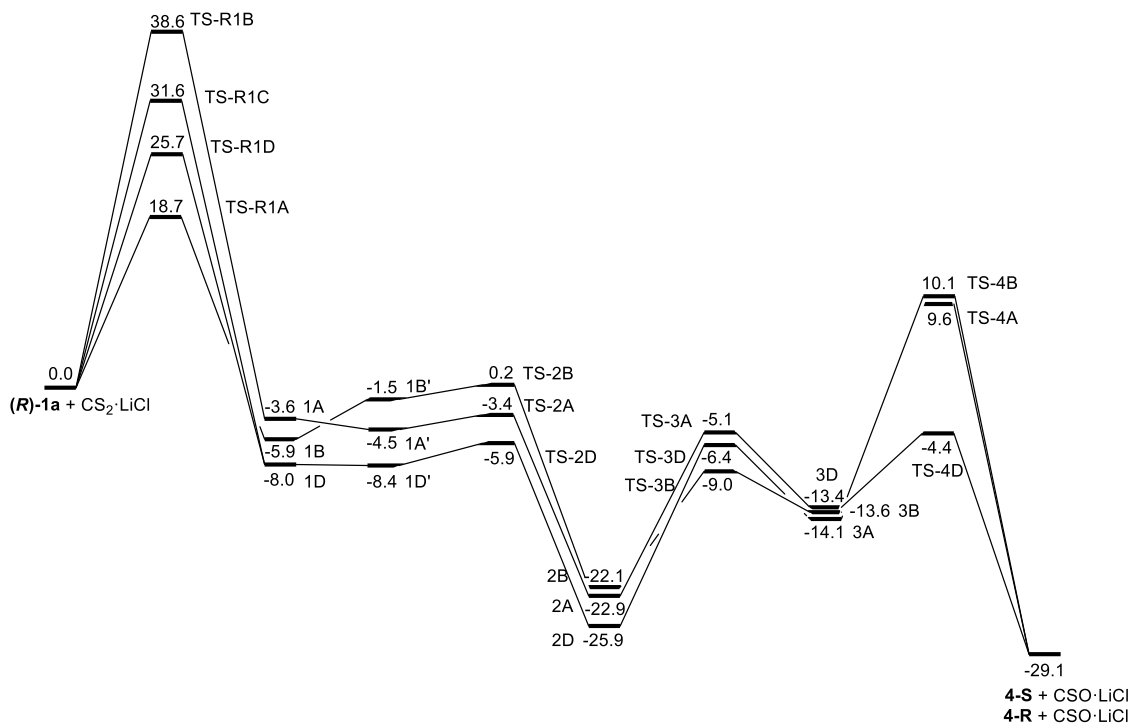

**Figure S2.** Reaction energy profile for the transformation of (R)-1a to 4-S/4-R. All energies are reported, relative to the reactant complex, as the Morokuma-corrected Gibbs free energies (373.15 K).

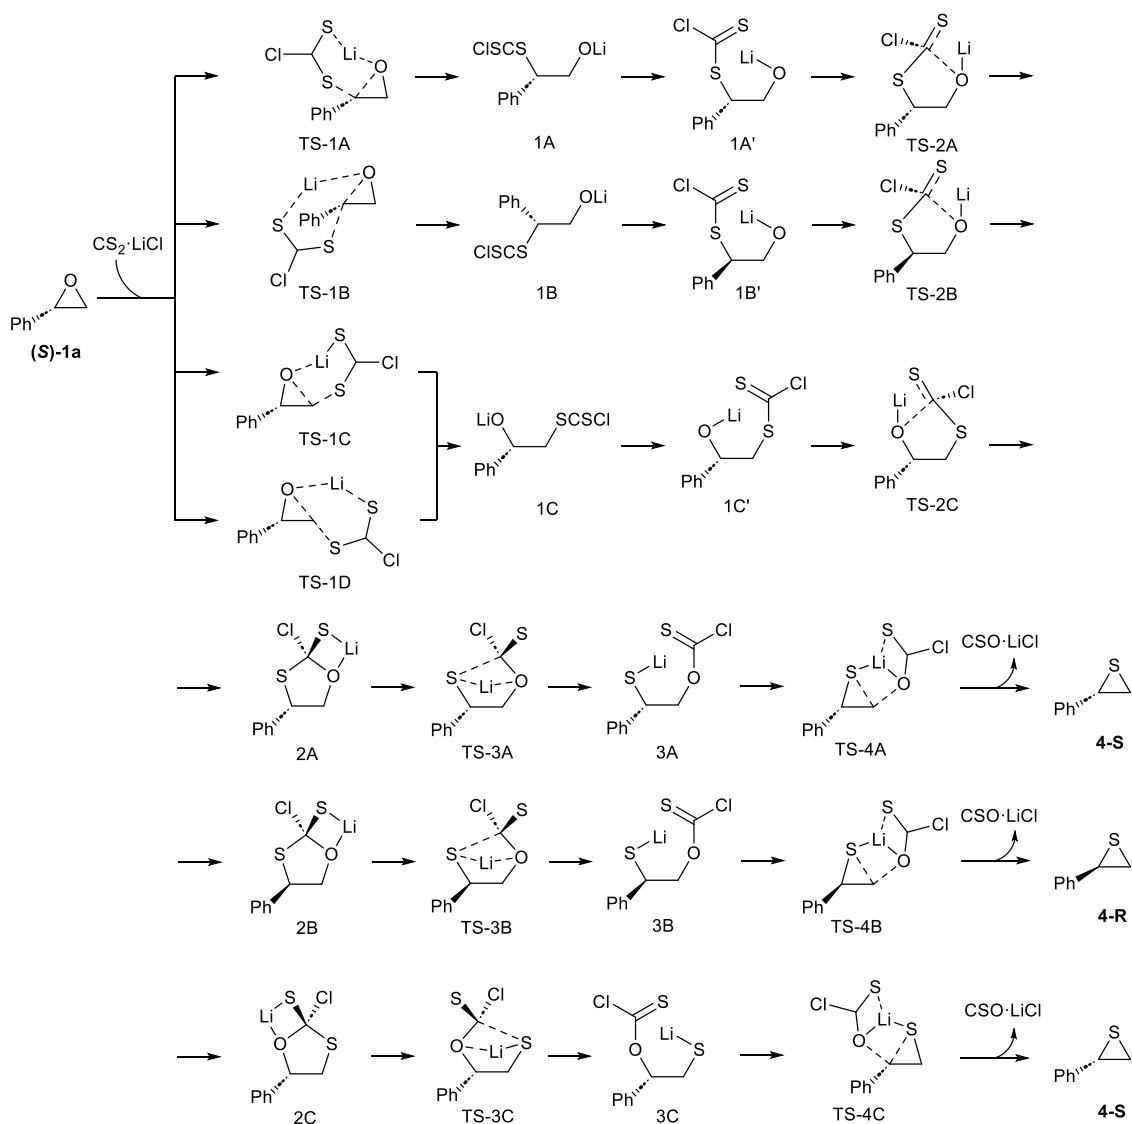

**Scheme S1.** Structures of the different stationary states involved in the transformation of (S)-1a to 4-S/4-R.

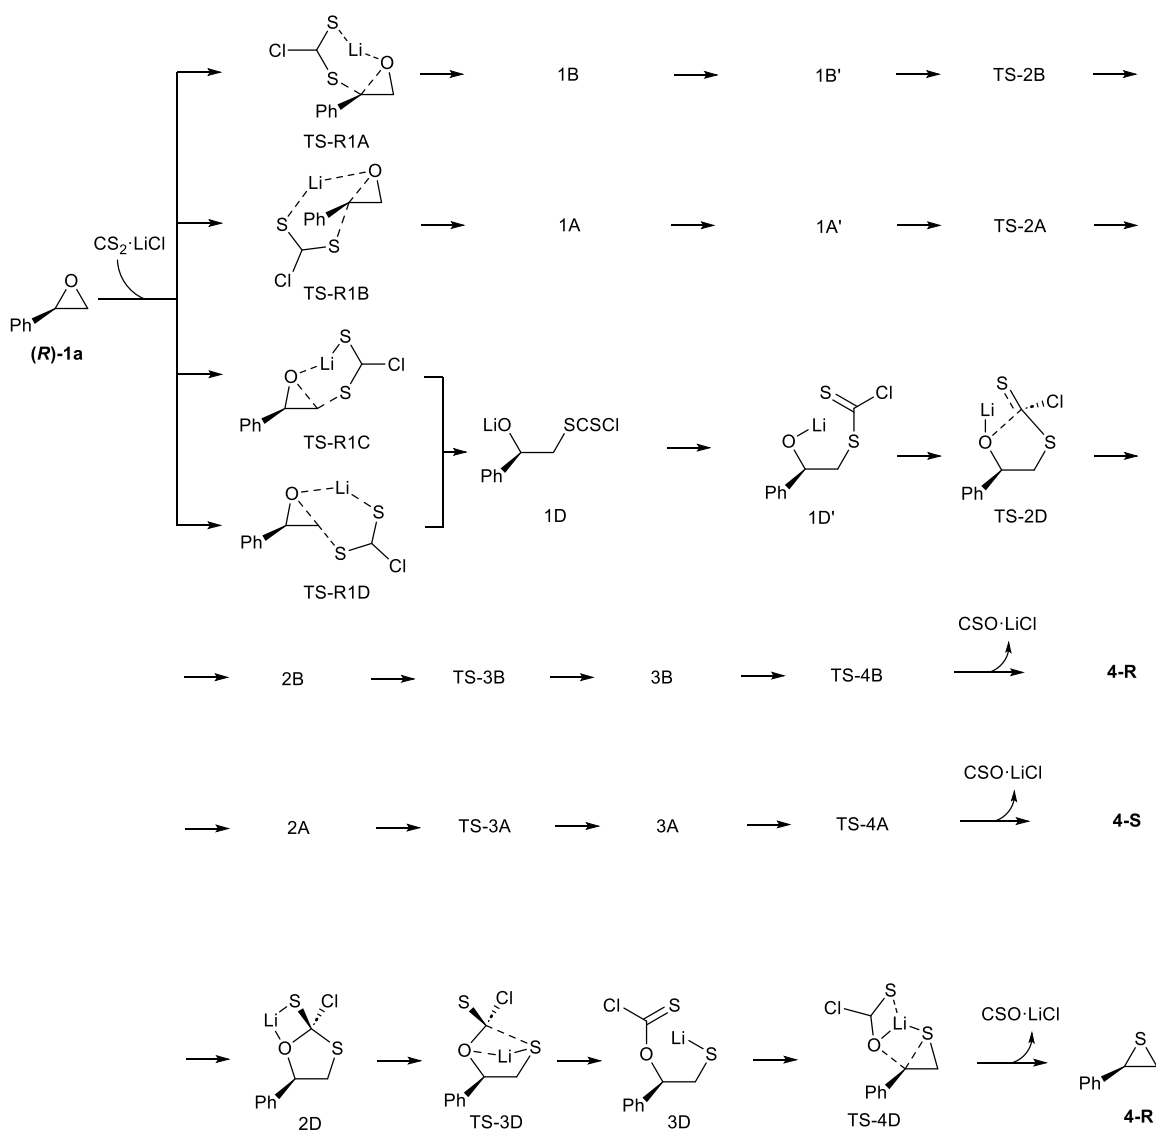

**Scheme S2.** Structures of the different stationary states involved in the transformation of **(R)-1a** to **4-S/4-R**.

Formation of the trithiocarbonates (TTC) from the Thiirane: **4-S/R** to **(S)-2a/(R)-2a**

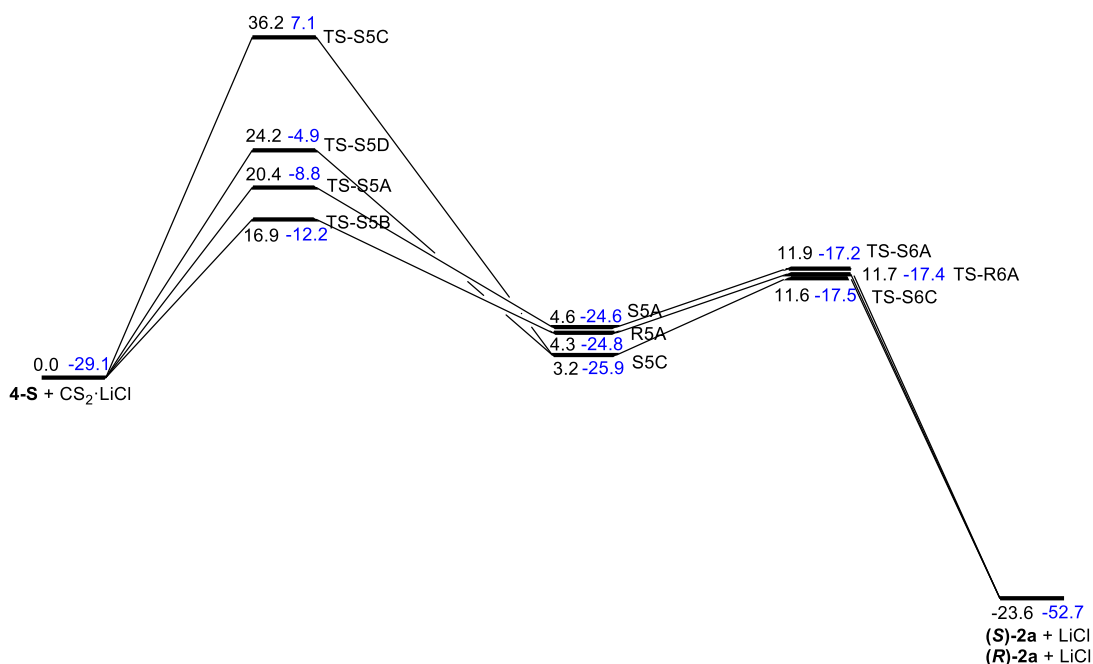

**Figure S3.** Reaction energy profile for the transformation of **4-S** to **(S)-2a/(R)-2a**. Energies are reported, relative to the reactant complex (black) and to **(S)-1a/(R)-1a** (blue), as the Morokuma-corrected Gibbs free energies (373.15 K).

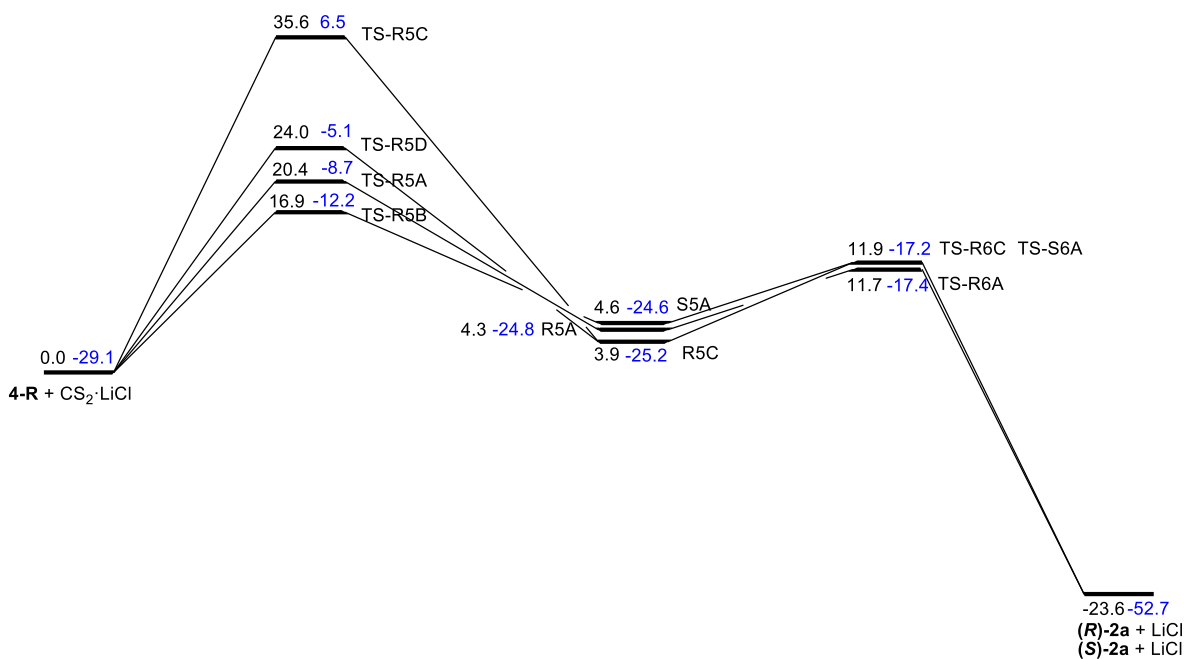

**Figure S4.** Reaction energy profile for the transformation of **4-R** to **(S)-2a/(R)-2a**. Energies are reported, relative to the reactant complex (black) and to **(S)-1a/(R)-1a** (blue), as the Morokuma-corrected Gibbs free energies (373.15 K).

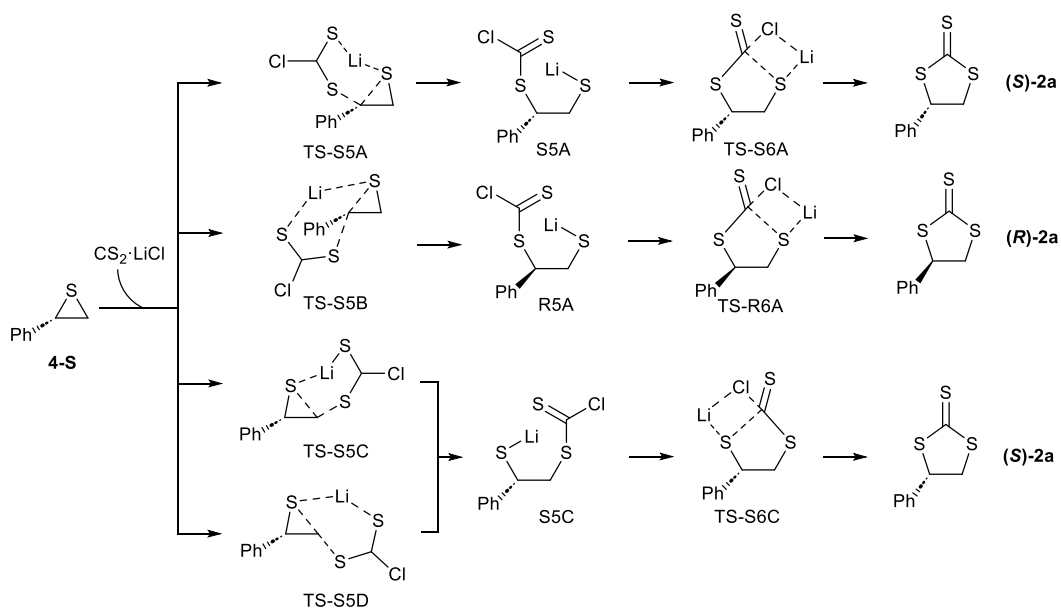

**Scheme S3.** Structures of the different stationary states involved in the transformation of **4-S** to **(S)-2a**/**(R)-2a**.

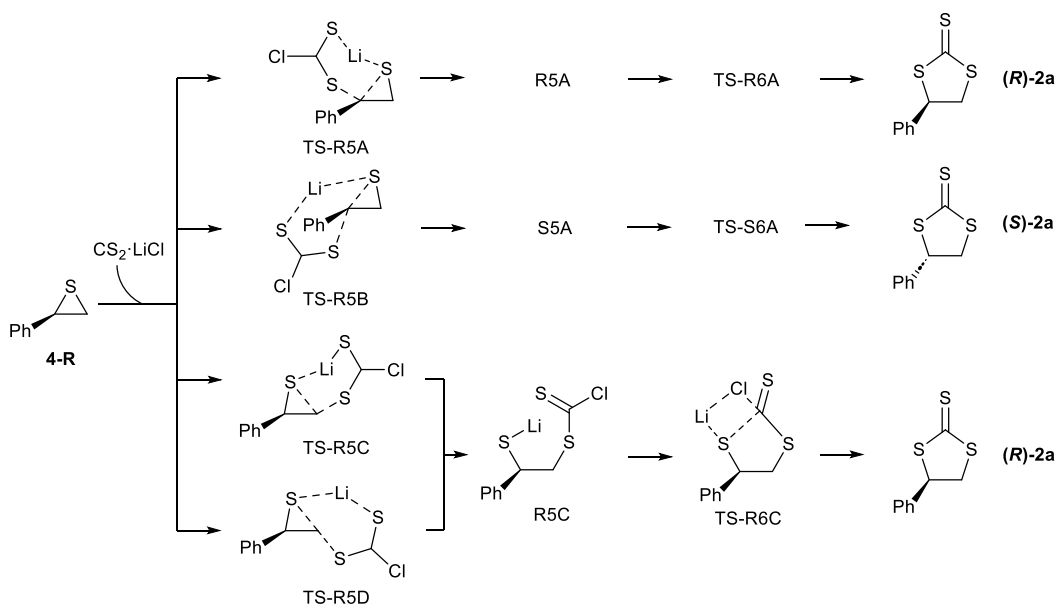

**Scheme S4.** Structures of the different stationary states involved in the transformation of **4-R** to **(S)-2a**/**(R)-2a**.



### 3. Wavefunction analysis

Trying to investigate the nucleophilic attack of the adduct on the starting oxiranes and thiiranes, wave function analyses were conducted. Specifically, we examined the electronic redistribution occurring at this reaction stage using the Quantum Theory of Atoms in Molecules (QTAIM) framework. [6] For such a purpose, we focused on two key aspects: electronic transfer, assessed through the atomic charge distribution (Q), and electronic sharing, evaluated via the delocalization index (DI).

Oxirane **R1i** and its corresponding thiirane **4-R1i** were used as prototypical models. The nucleophilic attack was modeled at both the more substituted (A) and less substituted (B) carbon atoms, considering upward (U) and downward (D) approaches, as illustrated in **Scheme S5**. Both gas-phase and solvated calculations were performed as indicated in the computational details.

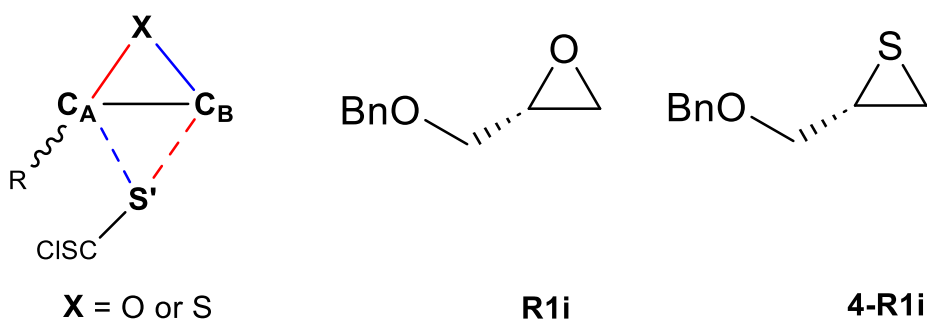

**Scheme S5.** Schematic representation of the nomenclature employed to refer to the most relevant atoms involved in the nucleophilic attack to the oxirane (**X = O**) or thiirane (**X = S**). The structures of the target oxirane (**R1i**) and thiirane (**4-R1i**) used as prototypical models are also shown.

## Nucleophilic attack to the oxirane

### Gas-Phase studies

Anionic reaction (without counter cation):

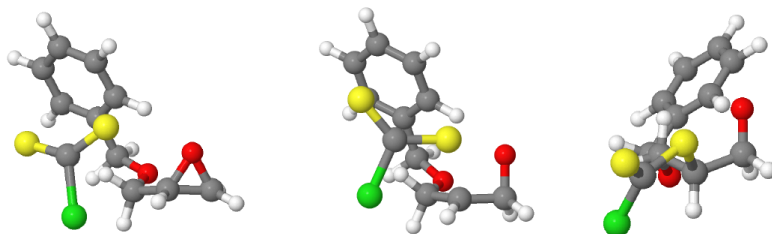

**Figure S5.** Reactant (left), transition state (center) and product (right) of the reaction between  $\text{CS}_2\text{Cl}^-$  and R1i (upward attack to  $\text{C}_A$ ).

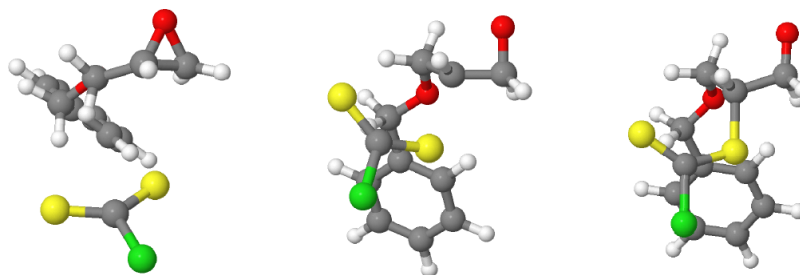

**Figure S6.** Reactant (left), transition state (center) and product (right) of the reaction between  $\text{CS}_2\text{Cl}^-$  and R1i (downward attack to  $\text{C}_A$ ).

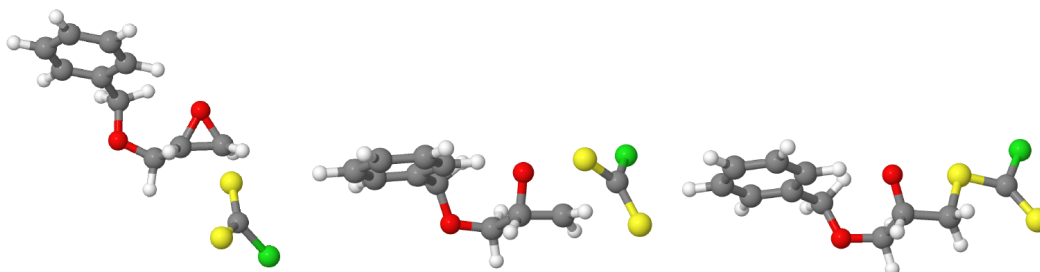

**Figure S7.** Reactant (left), transition state (center) and product (right) of the reaction between  $\text{CS}_2\text{Cl}^-$  and R1i (upward attack to  $\text{C}_B$ ).

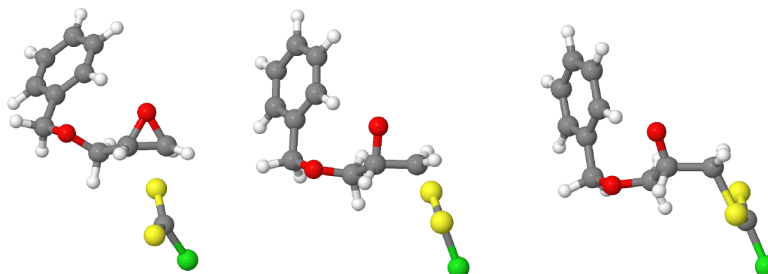

**Figure S8.** Reactant (left), transition state (center) and product (right) of the reaction between  $\text{CS}_2\text{Cl}^-$  and R1i (downward attack to  $\text{C}_B$ ).

| Approximation | Orientation | R   | TS   | P    |
|---------------|-------------|-----|------|------|
| A             | upward      | 0.0 | 56.6 | 14.5 |
| A             | downward    | 0.0 | 32.4 | 22.0 |
| B             | upward      | 0.0 | 52.6 | 11.6 |
| B             | downward    | 0.0 | 26.5 | 15.8 |

**Table S1.** Energies of the reactants (R), transition state (TS) and products (P) involved in the gas-phase reaction between  $\text{CS}_2\text{Cl}^-$  and R1i across various approximations and orientations. All energies are reported, relative to the reactant complex, as the Morokuma-corrected Gibbs free energies (373.15 K).

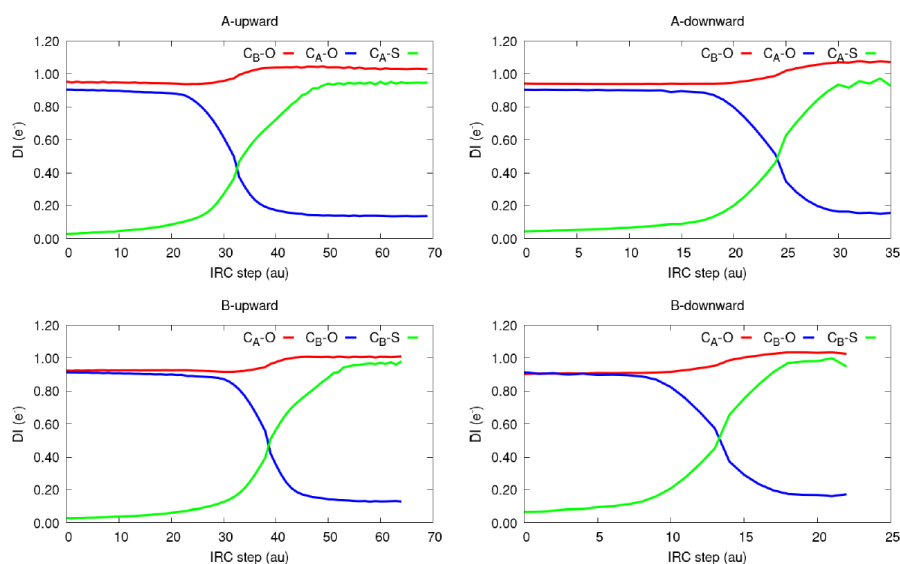

**Figure S9.** Evolution of the electron delocalization (DI) across the gas-phase reaction coordinate attributed to the nucleophilic attack of  $\text{CS}_2\text{Cl}^-$  to R1i. The results for different spatial approximations are shown. All values are reported in electron pairs.

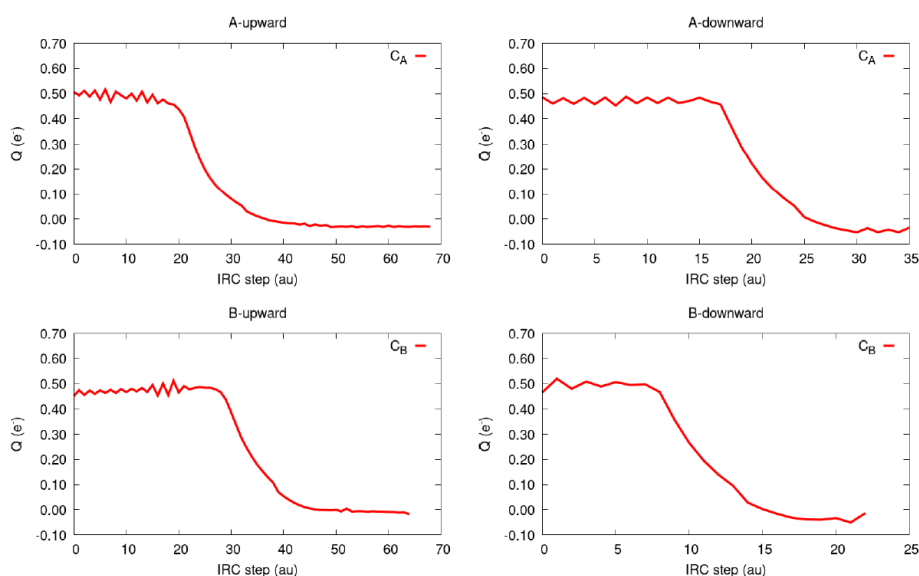

**Figure S10.** Evolution of the atomic charges (Q) of the electrophilic carbon across the gas-phase reaction coordinate attributed to the nucleophilic attack of  $\text{CS}_2\text{Cl}^-$  to R1i. The results for different spatial approximations are shown. All values are reported in electrons.

The upcoming section comprises the optimized geometries of the reactants (R), transition state (TS) and product (P) involved in the reaction across different approximations and orientations. All values are reported as XYZ Cartesian Coordinates in Angstroms.

**[R, Approximation: A, Orientation: Upward]**

|    |           |           |           |
|----|-----------|-----------|-----------|
| C  | -2.530361 | 2.773350  | -0.643218 |
| C  | -2.129996 | 1.452348  | -0.139281 |
| O  | -1.714977 | 1.911101  | -1.403644 |
| H  | -3.546063 | 2.924016  | -1.027248 |
| H  | -2.832847 | 0.611942  | -0.158022 |
| S  | 0.520983  | -2.319931 | 0.792305  |
| C  | -0.858726 | -1.930579 | -0.014546 |
| S  | -1.224304 | -1.583389 | -1.583155 |
| Cl | -2.390630 | -1.778078 | 1.155381  |
| H  | -2.023441 | 3.658501  | -0.245423 |
| C  | -1.069617 | 1.330911  | 0.926707  |
| H  | -1.560209 | 1.299110  | 1.918497  |
| H  | -0.532110 | 0.377363  | 0.807476  |
| O  | -0.189999 | 2.430061  | 0.836393  |
| C  | 1.105055  | 2.163592  | 1.287791  |
| H  | 1.090147  | 1.776305  | 2.326470  |
| H  | 1.625026  | 3.135421  | 1.312334  |
| C  | 1.882425  | 1.192052  | 0.419053  |
| C  | 1.434082  | 0.849814  | -0.857665 |
| C  | 3.056736  | 0.614320  | 0.911524  |
| C  | 2.140257  | -0.082244 | -1.617909 |
| H  | 0.501205  | 1.274331  | -1.235868 |
| C  | 3.778508  | -0.289876 | 0.138063  |
| H  | 3.396883  | 0.860826  | 1.921753  |
| C  | 3.314978  | -0.646438 | -1.128617 |
| H  | 1.733502  | -0.396458 | -2.579813 |
| H  | 4.687615  | -0.744173 | 0.537775  |
| H  | 3.853909  | -1.389515 | -1.719213 |

**[TS, Approximation: A, Orientation: Upward]**

|    |           |           |           |
|----|-----------|-----------|-----------|
| C  | 1.440027  | -3.007989 | -0.839122 |
| C  | 1.452228  | -1.912713 | 0.144443  |
| O  | 0.691696  | -2.286258 | -1.713548 |
| H  | 2.468763  | -3.275308 | -1.181877 |
| H  | 2.368459  | -1.500524 | 0.569089  |
| S  | 1.177711  | 2.987854  | -0.168852 |
| C  | 1.684343  | 1.435307  | -0.031653 |
| S  | 1.689837  | 0.185270  | -1.141267 |
| Cl | 2.314703  | 0.934608  | 1.653837  |
| H  | 0.976944  | -3.943192 | -0.434407 |
| C  | 0.285603  | -1.729612 | 1.059915  |
| H  | 0.646757  | -2.068172 | 2.058009  |
| H  | 0.053175  | -0.657457 | 1.172392  |
| O  | -0.835967 | -2.478715 | 0.683506  |
| C  | -2.067523 | -1.905152 | 1.010881  |
| H  | -2.172848 | -1.774960 | 2.108456  |
| H  | -2.827573 | -2.639297 | 0.699303  |
| C  | -2.316223 | -0.573096 | 0.330246  |
| C  | -1.615025 | -0.254404 | -0.836957 |
| C  | -3.201717 | 0.355488  | 0.884712  |
| C  | -1.772786 | 1.007316  | -1.411485 |
| H  | -0.900648 | -0.979674 | -1.250392 |
| C  | -3.388747 | 1.598199  | 0.281607  |
| H  | -3.733040 | 0.112582  | 1.809999  |
| C  | -2.660489 | 1.931045  | -0.861227 |
| H  | -1.156158 | 1.276556  | -2.270921 |

|   |           |          |           |
|---|-----------|----------|-----------|
| H | -4.075167 | 2.322273 | 0.725885  |
| H | -2.763358 | 2.922314 | -1.306691 |

**[P, Approximation: A, Orientation: Upward]**

|    |           |           |           |
|----|-----------|-----------|-----------|
| C  | -0.104037 | 1.389204  | 1.521713  |
| C  | -0.951897 | 0.206408  | 0.948037  |
| O  | 0.405167  | 2.105665  | 0.531590  |
| H  | -0.800159 | 1.932913  | 2.229380  |
| H  | -1.488511 | -0.383240 | 1.705192  |
| S  | -4.863187 | 0.483836  | -1.124879 |
| C  | -3.510611 | 0.031449  | -0.332331 |
| S  | -2.161931 | 1.076463  | -0.119931 |
| Cl | -3.401828 | -1.615188 | 0.328535  |
| H  | 0.631894  | 0.868997  | 2.205615  |
| C  | -0.079430 | -0.658943 | 0.054849  |
| H  | -0.672699 | -1.430327 | -0.473701 |
| H  | 0.378888  | 0.025556  | -0.679023 |
| O  | 0.900366  | -1.276342 | 0.860435  |
| C  | 1.992295  | -1.781908 | 0.161179  |
| H  | 1.666115  | -2.227261 | -0.801736 |
| H  | 2.405989  | -2.608662 | 0.762559  |
| C  | 3.110850  | -0.787034 | -0.109004 |
| C  | 2.942117  | 0.596883  | 0.020384  |
| C  | 4.355464  | -1.296399 | -0.502417 |
| C  | 4.026133  | 1.438833  | -0.250143 |
| H  | 1.976383  | 1.081323  | 0.284192  |
| C  | 5.427958  | -0.449112 | -0.768454 |
| H  | 4.486541  | -2.379564 | -0.594171 |
| C  | 5.263921  | 0.931206  | -0.639834 |
| H  | 3.876324  | 2.516166  | -0.152031 |
| H  | 6.391957  | -0.865151 | -1.070038 |
| H  | 6.099398  | 1.604554  | -0.844457 |

**[R, Approximation: A, Orientation: Downward]**

|    |           |           |           |
|----|-----------|-----------|-----------|
| C  | 0.397618  | 2.879318  | -1.266025 |
| C  | 0.872780  | 2.845108  | 0.114048  |
| O  | 0.027043  | 3.883191  | -0.336754 |
| H  | 1.082378  | 3.193843  | -2.061060 |
| H  | 1.907021  | 3.151109  | 0.318960  |
| S  | 2.240101  | -1.436807 | 1.584282  |
| C  | 2.538270  | -1.054042 | -0.003264 |
| S  | 1.566843  | -0.422730 | -1.193892 |
| Cl | 4.275971  | -1.373720 | -0.542734 |
| H  | -0.395462 | 2.180206  | -1.543565 |
| C  | 0.311337  | 1.869378  | 1.111478  |
| H  | 1.037436  | 1.046098  | 1.240197  |
| H  | 0.192793  | 2.378872  | 2.091270  |
| O  | -0.921428 | 1.380247  | 0.663008  |
| C  | -1.287747 | 0.169846  | 1.277424  |
| H  | -1.578750 | 0.341088  | 2.334028  |
| H  | -0.428340 | -0.527126 | 1.268029  |
| C  | -2.442040 | -0.428523 | 0.517523  |
| C  | -3.728074 | -0.497490 | 1.054838  |
| C  | -2.217982 | -0.912255 | -0.777866 |
| C  | -4.780396 | -1.045193 | 0.317951  |
| H  | -3.906618 | -0.115030 | 2.062860  |
| C  | -3.266515 | -1.454599 | -1.515845 |
| H  | -1.200347 | -0.865004 | -1.177201 |
| C  | -4.551195 | -1.522696 | -0.970463 |
| H  | -5.781750 | -1.094235 | 0.750787  |
| H  | -3.080567 | -1.834109 | -2.522524 |
| H  | -5.371673 | -1.950488 | -1.550368 |

**[TS, Approximation: A, Orientation: Downward]**

|    |           |           |           |
|----|-----------|-----------|-----------|
| C  | 1.521936  | 2.747055  | -1.226153 |
| C  | 1.680556  | 1.729057  | -0.154481 |
| O  | 2.137065  | 3.655361  | -0.450696 |
| H  | 2.029680  | 2.439054  | -2.175488 |
| H  | 2.718302  | 1.443983  | 0.031565  |
| S  | 2.735285  | -1.185835 | 1.401031  |
| C  | 2.001254  | -1.368203 | -0.057524 |
| S  | 1.093060  | -0.275064 | -0.964957 |
| Cl | 2.160120  | -2.976270 | -0.869034 |
| H  | 0.443318  | 2.921578  | -1.478715 |
| C  | 0.814222  | 1.863503  | 1.077376  |
| H  | 1.162774  | 1.157164  | 1.846809  |
| H  | 0.957462  | 2.893135  | 1.429594  |
| O  | -0.558980 | 1.667232  | 0.800569  |
| C  | -1.124765 | 0.535479  | 1.385566  |
| H  | -1.389929 | 0.722591  | 2.446849  |
| H  | -0.407557 | -0.308395 | 1.375206  |
| C  | -2.364299 | 0.122172  | 0.631379  |
| C  | -3.336140 | -0.675306 | 1.243346  |
| C  | -2.539697 | 0.501463  | -0.702135 |
| C  | -4.460224 | -1.097471 | 0.536022  |
| H  | -3.208565 | -0.968059 | 2.289022  |
| C  | -3.666334 | 0.083176  | -1.409131 |
| H  | -1.777947 | 1.130465  | -1.163908 |
| C  | -4.629298 | -0.717738 | -0.795599 |
| H  | -5.209515 | -1.721510 | 1.027379  |
| H  | -3.791496 | 0.385111  | -2.450801 |
| H  | -5.510038 | -1.044002 | -1.352093 |

**[P, Approximation: A, Orientation: Downward]**

|    |           |           |           |
|----|-----------|-----------|-----------|
| C  | 1.862801  | 2.529395  | -1.120465 |
| C  | 1.874854  | 1.291037  | -0.110439 |
| O  | 2.297086  | 3.599270  | -0.533786 |
| H  | 2.451352  | 2.129213  | -2.013888 |
| H  | 2.925380  | 1.051532  | 0.113576  |
| S  | 2.545376  | -1.661552 | 1.250284  |
| C  | 1.700937  | -1.529732 | -0.134507 |
| S  | 1.163704  | -0.140663 | -0.980313 |
| Cl | 1.180150  | -2.994207 | -1.008141 |
| H  | 0.784369  | 2.538489  | -1.523273 |
| C  | 1.163771  | 1.665543  | 1.178493  |
| H  | 1.457513  | 1.017859  | 2.021872  |
| H  | 1.510022  | 2.698780  | 1.344660  |
| O  | -0.244022 | 1.684120  | 1.040129  |
| C  | -0.911973 | 0.563378  | 1.523235  |
| H  | -1.193743 | 0.696668  | 2.588874  |
| H  | -0.267599 | -0.336524 | 1.483120  |
| C  | -2.160717 | 0.297952  | 0.714921  |
| C  | -3.150209 | -0.562577 | 1.200995  |
| C  | -2.329425 | 0.889205  | -0.539683 |
| C  | -4.287111 | -0.839066 | 0.444450  |
| H  | -3.026040 | -1.021147 | 2.186015  |
| C  | -3.469423 | 0.614862  | -1.295359 |
| H  | -1.551660 | 1.563682  | -0.902274 |
| C  | -4.450300 | -0.248980 | -0.809485 |
| H  | -5.050393 | -1.514856 | 0.835750  |
| H  | -3.590026 | 1.081658  | -2.274874 |
| H  | -5.340736 | -0.461621 | -1.404364 |

**[R, Approximation: B, Orientation: Upward]**

|    |           |           |           |
|----|-----------|-----------|-----------|
| C  | -0.293356 | 0.986012  | 0.306222  |
| C  | 0.658213  | 1.722282  | -0.524061 |
| O  | -0.629905 | 1.384876  | -1.019099 |
| H  | 1.495846  | 1.169078  | -0.963616 |
| S  | 3.235775  | -0.870618 | -1.273234 |
| C  | 3.909982  | -0.148927 | 0.063407  |
| Cl | 5.760703  | -0.172751 | 0.070021  |
| S  | 3.239554  | 0.594601  | 1.386240  |
| H  | -0.850730 | 1.526350  | 1.083424  |
| C  | -0.114780 | -0.485692 | 0.551354  |
| H  | 0.469756  | -0.621307 | 1.471103  |
| H  | 0.480188  | -0.920122 | -0.272461 |
| O  | -1.347828 | -1.155170 | 0.732527  |
| C  | -2.134046 | -1.279532 | -0.430129 |
| H  | -2.276982 | -2.353112 | -0.649150 |
| H  | -1.630047 | -0.815738 | -1.292186 |
| C  | -3.487942 | -0.633430 | -0.231942 |
| C  | -4.553668 | -1.371558 | 0.290968  |
| C  | -3.682475 | 0.723373  | -0.519100 |
| C  | -5.792953 | -0.775092 | 0.521975  |
| H  | -4.404212 | -2.429489 | 0.520648  |
| C  | -4.920752 | 1.321692  | -0.289271 |
| H  | -2.847736 | 1.303578  | -0.921412 |
| C  | -5.979087 | 0.575709  | 0.231085  |
| H  | -6.615474 | -1.365928 | 0.930073  |
| H  | -5.060888 | 2.379657  | -0.519694 |
| H  | -6.947916 | 1.046660  | 0.408880  |
| H  | 0.818029  | 2.786762  | -0.324530 |

**[TS, Approximation: B, Orientation: Upward]**

|    |           |           |           |
|----|-----------|-----------|-----------|
| C  | -0.298311 | 0.567628  | 0.993024  |
| C  | 1.078690  | 1.051804  | 0.975983  |
| O  | -0.300486 | 0.760993  | -0.373549 |
| H  | 1.912087  | 0.532390  | 1.463104  |
| S  | 2.414301  | 0.351219  | -0.938547 |
| C  | 3.919493  | 0.131598  | -0.237657 |
| Cl | 5.047355  | -0.908480 | -1.227285 |
| S  | 4.495279  | 0.677711  | 1.208350  |
| H  | -1.035180 | 1.183455  | 1.565616  |
| C  | -0.451618 | -0.882946 | 1.435792  |
| H  | -0.197621 | -0.980058 | 2.504180  |
| H  | 0.263981  | -1.490306 | 0.846762  |
| O  | -1.765132 | -1.371916 | 1.305649  |
| C  | -2.241947 | -1.489763 | -0.020987 |
| H  | -2.523750 | -2.544419 | -0.195164 |
| H  | -1.456956 | -1.195644 | -0.733151 |
| C  | -3.458974 | -0.615081 | -0.230703 |
| C  | -4.746918 | -1.140731 | -0.099707 |
| C  | -3.304681 | 0.748383  | -0.519563 |
| C  | -5.871301 | -0.328308 | -0.253923 |
| H  | -4.867941 | -2.203321 | 0.127385  |
| C  | -4.428262 | 1.559090  | -0.671751 |
| H  | -2.282567 | 1.138152  | -0.629146 |
| C  | -5.712675 | 1.026412  | -0.540015 |
| H  | -6.871745 | -0.753841 | -0.150020 |
| H  | -4.300660 | 2.619235  | -0.900957 |
| H  | -6.588818 | 1.666760  | -0.663212 |
| H  | 1.214828  | 2.127757  | 0.871847  |

**[P, Approximation: B, Orientation: Upward]**

|   |           |          |          |
|---|-----------|----------|----------|
| C | 0.000178  | 0.741426 | 0.687182 |
| C | -1.530640 | 0.857945 | 0.930871 |

|    |           |           |           |
|----|-----------|-----------|-----------|
| O  | 0.350288  | -0.546501 | 0.627085  |
| H  | -2.023705 | 1.785452  | 0.600690  |
| S  | -2.209101 | -0.547261 | -0.011717 |
| C  | -3.890828 | -0.198622 | 0.030778  |
| Cl | -4.755190 | -1.447583 | -0.909638 |
| S  | -4.735382 | 0.980265  | 0.773037  |
| H  | 0.475756  | 1.332919  | 1.526013  |
| C  | 0.352563  | 1.542328  | -0.585079 |
| H  | 0.052688  | 2.600392  | -0.482784 |
| H  | -0.201520 | 1.107643  | -1.444550 |
| O  | 1.737099  | 1.555121  | -0.842992 |
| C  | 2.266031  | 0.353044  | -1.360621 |
| H  | 2.543559  | 0.505698  | -2.423706 |
| H  | 1.516773  | -0.446155 | -1.272751 |
| C  | 3.495489  | -0.054106 | -0.581606 |
| C  | 4.779700  | 0.115963  | -1.101770 |
| C  | 3.339291  | -0.591627 | 0.705869  |
| C  | 5.906314  | -0.245253 | -0.358320 |
| H  | 4.898860  | 0.539210  | -2.103123 |
| C  | 4.464806  | -0.948634 | 1.444955  |
| H  | 2.303914  | -0.722474 | 1.061731  |
| C  | 5.749446  | -0.777237 | 0.919372  |
| H  | 6.905839  | -0.107156 | -0.777116 |
| H  | 4.341550  | -1.372076 | 2.444607  |
| H  | 6.626473  | -1.060838 | 1.506012  |
| H  | -1.783427 | 0.677883  | 1.985153  |

**[R, Approximation: B, Orientation: Downward]**

|    |           |           |           |
|----|-----------|-----------|-----------|
| C  | 0.156793  | 2.299509  | -0.208077 |
| C  | 0.896583  | 1.988135  | -1.425771 |
| O  | -0.480486 | 2.337042  | -1.473547 |
| H  | 1.141999  | 0.938433  | -1.623379 |
| H  | 1.585024  | 2.736764  | -1.830396 |
| S  | 3.373850  | 0.878210  | 0.657114  |
| C  | 3.215111  | -0.651933 | 0.034391  |
| Cl | 4.804160  | -1.602456 | -0.038783 |
| S  | 1.903481  | -1.495005 | -0.538537 |
| H  | 0.288984  | 3.282563  | 0.261414  |
| C  | -0.270098 | 1.202412  | 0.714313  |
| H  | 0.517680  | 1.023988  | 1.467827  |
| H  | -0.383202 | 0.269544  | 0.136035  |
| O  | -1.489805 | 1.593892  | 1.327889  |
| C  | -2.234854 | 0.531785  | 1.826918  |
| H  | -2.919215 | 0.943950  | 2.587438  |
| H  | -1.588228 | -0.206350 | 2.341189  |
| C  | -3.063222 | -0.182490 | 0.772875  |
| C  | -3.824060 | -1.301345 | 1.128400  |
| C  | -3.100681 | 0.276292  | -0.545942 |
| C  | -4.618717 | -1.950212 | 0.186944  |
| H  | -3.789409 | -1.669156 | 2.157943  |
| C  | -3.891183 | -0.380605 | -1.490640 |
| H  | -2.487147 | 1.132546  | -0.834981 |
| C  | -4.654783 | -1.489025 | -1.129988 |
| H  | -5.206234 | -2.823123 | 0.478505  |
| H  | -3.901565 | -0.021608 | -2.521399 |
| H  | -5.269694 | -1.999699 | -1.873399 |

**[TS, Approximation: B, Orientation: Downward]**

|   |           |          |           |
|---|-----------|----------|-----------|
| C | -0.251933 | 1.880556 | -0.328225 |
| C | -1.294579 | 1.822411 | 0.715731  |
| O | 0.563556  | 2.402641 | 0.618637  |
| H | -1.166378 | 1.047716 | 1.472439  |



|    |           |           |           |
|----|-----------|-----------|-----------|
| H  | -1.677146 | 2.787982  | 1.041137  |
| S  | -3.301547 | 1.103890  | -0.017850 |
| C  | -3.282044 | -0.553170 | 0.311835  |
| Cl | -4.784406 | -1.371558 | -0.288040 |
| S  | -2.163911 | -1.491078 | 1.054953  |
| H  | -0.512368 | 2.544715  | -1.188293 |
| C  | 0.160257  | 0.529841  | -0.889552 |
| H  | -0.677540 | 0.043584  | -1.427513 |
| H  | 0.450941  | -0.118454 | -0.043687 |
| O  | 1.251023  | 0.735864  | -1.770735 |
| C  | 2.134137  | -0.330219 | -1.861773 |
| H  | 2.699477  | -0.203095 | -2.800832 |
| H  | 1.595217  | -1.296576 | -1.943487 |
| C  | 3.128381  | -0.412493 | -0.715209 |
| C  | 4.067968  | -1.449451 | -0.694428 |
| C  | 3.136175  | 0.545222  | 0.303570  |
| C  | 5.015286  | -1.532781 | 0.322965  |
| H  | 4.056083  | -2.201452 | -1.489462 |
| C  | 4.083799  | 0.451165  | 1.326055  |
| H  | 2.379054  | 1.341521  | 0.318946  |
| C  | 5.025483  | -0.576488 | 1.339972  |
| H  | 5.743974  | -2.346353 | 0.326046  |
| H  | 4.074621  | 1.195229  | 2.125077  |
| H  | 5.762069  | -0.638911 | 2.143797  |

**[P, Approximation: B, Orientation: Downward]**

|    |           |           |           |
|----|-----------|-----------|-----------|
| C  | 0.267417  | 1.724105  | 0.371730  |
| C  | 1.517697  | 1.699241  | -0.589386 |
| O  | -0.684521 | 2.400934  | -0.222861 |
| H  | 1.302027  | 1.109207  | -1.491426 |
| H  | 1.692462  | 2.745076  | -0.873833 |
| S  | 3.109318  | 1.141668  | 0.105897  |
| C  | 3.279355  | -0.496316 | -0.380638 |
| Cl | 4.772188  | -1.155151 | 0.339885  |
| S  | 2.334455  | -1.424461 | -1.315127 |
| H  | 0.664160  | 2.148307  | 1.352510  |
| C  | -0.100318 | 0.265147  | 0.717959  |
| H  | 0.769926  | -0.327982 | 1.068965  |
| H  | -0.493948 | -0.203870 | -0.203733 |
| O  | -1.087009 | 0.281711  | 1.733759  |
| C  | -2.010846 | -0.748822 | 1.673666  |
| H  | -2.484514 | -0.817157 | 2.668586  |
| H  | -1.518535 | -1.727624 | 1.490493  |
| C  | -3.106828 | -0.545689 | 0.639853  |
| C  | -4.091026 | -1.528018 | 0.480435  |
| C  | -3.157129 | 0.620896  | -0.131532 |
| C  | -5.129044 | -1.355702 | -0.432488 |
| H  | -4.043124 | -2.440655 | 1.083345  |
| C  | -4.197560 | 0.780147  | -1.051550 |
| H  | -2.357498 | 1.381966  | -0.044275 |
| C  | -5.184301 | -0.193322 | -1.203894 |
| H  | -5.892737 | -2.128700 | -0.545602 |
| H  | -4.225746 | 1.685551  | -1.661872 |
| H  | -5.992307 | -0.053002 | -1.925625 |

Neutral reaction (using  $\text{N}(\text{CH}_3)_4^+$  as a counter cation):

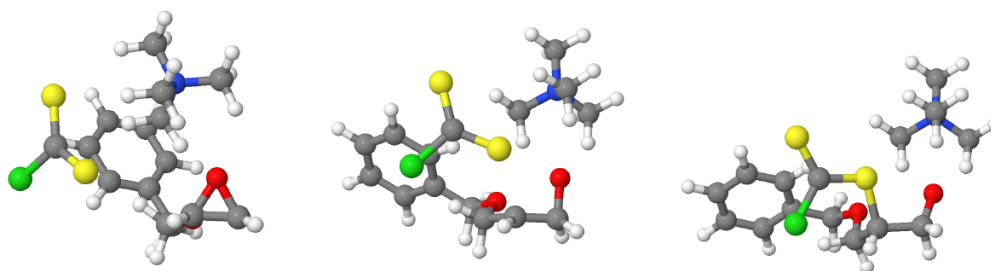

**Figure S11.** Reactant (left), transition state (center) and product (right) of the reaction between  $\text{CS}_2\text{Cl}^-$  +  $\text{N}(\text{CH}_3)_4^+$  and R1i (upward attack to  $\text{C}_A$ ).

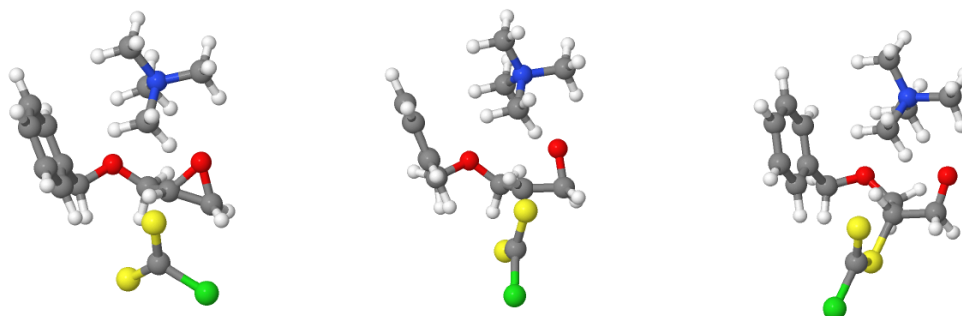

**Figure S12.** Reactant (left), transition state (center) and product (right) of the reaction between  $\text{CS}_2\text{Cl}^-$  +  $\text{N}(\text{CH}_3)_4^+$  and R1i (downward attack to  $\text{C}_A$ ).

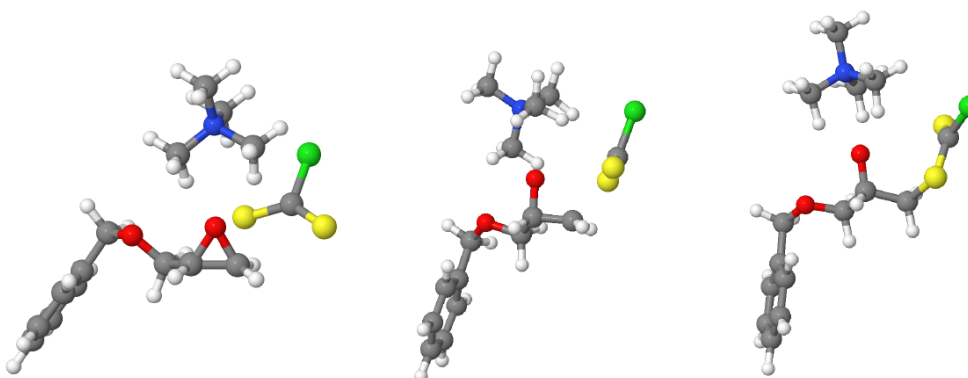

**Figure S13.** Reactant (left), transition state (center) and product (right) of the reaction between  $\text{CS}_2\text{Cl}^-$  +  $\text{N}(\text{CH}_3)_4^+$  and R1i (upward attack to  $\text{C}_B$ ).

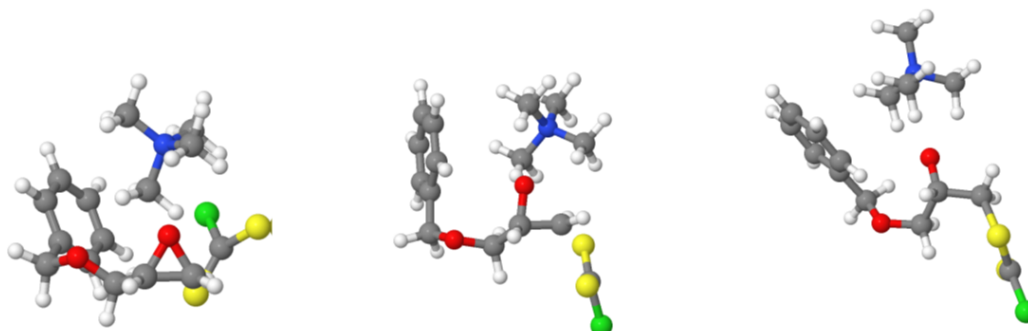

**Figure S14.** Reactant (left), transition state (center) and product (right) of the reaction between  $\text{CS}_2\text{Cl}^-$  +  $\text{N}(\text{CH}_3)_4^+$  and R1i (downward attack to  $\text{C}_B$ ).

| Approximation | Orientation | R   | TS   | P    |
|---------------|-------------|-----|------|------|
| A             | upward      | 0.0 | 57.0 | 13.3 |
| A             | downward    | 0.0 | 23.6 | 3.8  |
| B             | upward      | 0.0 | 53.9 | 4.0  |
| B             | downward    | 0.0 | 32.9 | 6.5  |

**Table S2.** Energies of the reactants (R), transition state (TS) and products (P) involved in the gas-phase reaction between  $\text{CS}_2\text{Cl}^- + \text{N}(\text{CH}_3)_4^+$  and R1i across various approximations and orientations. All energies are reported, relative to the reactant complex, as the Morokuma-corrected Gibbs free energies (373.15 K).

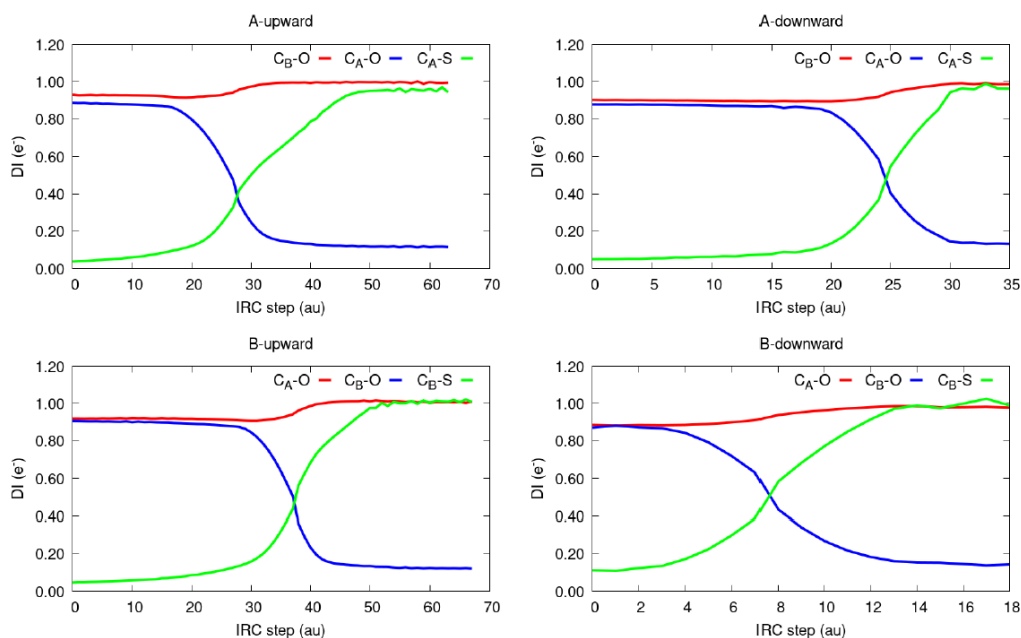

**Figure S15.** Evolution of the electron delocalization (DI) across the gas-phase reaction coordinate attributed to the nucleophilic attack of  $\text{CS}_2\text{Cl}^- + \text{N}(\text{CH}_3)_4^+$  to R1i. The results for different spatial approximations are shown. All values are reported in electron pairs.

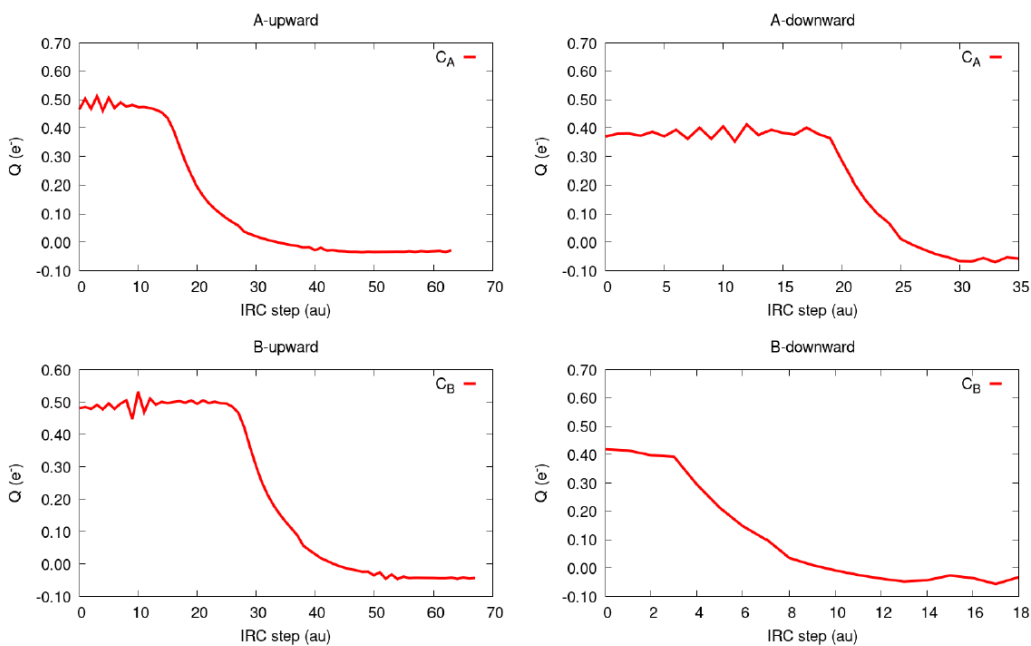

**Figure S16.** Evolution of the atomic charges (Q) of the electrophilic carbon across the gas-phase reaction coordinate attributed to the nucleophilic attack of  $\text{CS}_2\text{Cl}^- + \text{N}(\text{CH}_3)_4^+$  to R1i. The results for different spatial approximations are shown. All values are reported in electrons.

The upcoming section comprises the optimized geometries of the reactants (R), transition state (TS) and product (P) involved in the reaction across different approximations and orientations. All values are reported as XYZ Cartesian Coordinates in Angstroms.

**[R, Approximation: A, Orientation: Upward]**

|    |           |           |           |
|----|-----------|-----------|-----------|
| C  | -3.942144 | 0.673425  | -1.656523 |
| C  | -2.511234 | 0.687494  | -1.977280 |
| O  | -2.987114 | 1.164414  | -0.729488 |
| H  | -4.602844 | 1.430508  | -2.088931 |
| H  | -2.120487 | 1.469483  | -2.638725 |
| S  | 2.816554  | 1.422940  | 0.593854  |
| C  | 2.298341  | 1.097788  | -0.957553 |
| S  | 1.012978  | 1.697642  | -1.824086 |
| Cl | 3.314659  | -0.121358 | -1.847162 |
| H  | -4.395719 | -0.280985 | -1.377328 |
| C  | -1.686582 | -0.571383 | -1.970238 |
| H  | -1.603807 | -0.935123 | -3.013618 |
| H  | -0.666515 | -0.319782 | -1.633387 |
| O  | -2.291564 | -1.533519 | -1.149855 |
| C  | -1.550256 | -2.733509 | -1.042946 |
| H  | -1.128018 | -2.999571 | -2.028672 |
| H  | -2.271596 | -3.513055 | -0.761460 |
| C  | -0.449518 | -2.666827 | -0.007352 |
| C  | 0.814446  | -2.143361 | -0.311149 |
| C  | -0.700583 | -3.110989 | 1.296727  |
| C  | 1.799002  | -2.043377 | 0.673912  |
| H  | 1.051792  | -1.802929 | -1.323483 |
| C  | 0.284282  | -3.026413 | 2.280487  |
| H  | -1.678690 | -3.534746 | 1.538070  |
| C  | 1.532794  | -2.483254 | 1.970746  |
| H  | 2.765779  | -1.605975 | 0.418630  |
| H  | 0.079284  | -3.390549 | 3.289110  |
| H  | 2.305867  | -2.410623 | 2.737586  |
| C  | -0.610835 | 0.364410  | 1.231192  |
| H  | 0.349635  | 0.473930  | 0.714074  |
| H  | -0.548853 | -0.436598 | 1.978463  |
| N  | -0.899335 | 1.652608  | 1.942659  |
| C  | -0.761973 | 2.793243  | 0.984504  |
| H  | -0.993095 | 3.719571  | 1.525771  |
| H  | 0.265452  | 2.793214  | 0.596079  |
| H  | -1.468734 | 2.629887  | 0.163266  |
| C  | -2.285347 | 1.611275  | 2.473995  |
| H  | -2.965993 | 1.501149  | 1.621274  |
| H  | -2.377305 | 0.751655  | 3.148718  |
| H  | -2.487348 | 2.542446  | 3.017349  |
| C  | 0.083313  | 1.828899  | 3.046395  |
| H  | 1.085144  | 1.834410  | 2.596736  |
| H  | -0.121675 | 2.780100  | 3.552525  |
| H  | -0.020881 | 0.992236  | 3.747285  |
| H  | -1.430584 | 0.165172  | 0.532767  |

**[TS, Approximation: A, Orientation: Upward]**

|    |           |           |           |
|----|-----------|-----------|-----------|
| C  | 1.890322  | -1.501793 | 2.673906  |
| C  | 0.718239  | -0.611183 | 2.650835  |
| O  | 2.347416  | -1.052642 | 1.458828  |
| H  | 2.565546  | -1.306143 | 3.531950  |
| H  | 0.585956  | 0.179977  | 3.389111  |
| S  | 0.018600  | 2.883395  | -1.031726 |
| C  | -0.014214 | 2.259265  | 0.501896  |
| S  | 1.253346  | 1.515276  | 1.308223  |
| Cl | -1.568059 | 2.350632  | 1.401061  |
| H  | 1.596724  | -2.574745 | 2.707366  |
| C  | -0.553108 | -1.065431 | 2.029080  |

|   |           |           |           |
|---|-----------|-----------|-----------|
| H | -1.073232 | -1.601449 | 2.860473  |
| H | -1.193380 | -0.212051 | 1.754179  |
| O | -0.337138 | -1.939548 | 0.961196  |
| C | -1.499966 | -2.543929 | 0.462549  |
| H | -2.062708 | -3.036202 | 1.279658  |
| H | -1.154706 | -3.340685 | -0.214713 |
| C | -2.421815 | -1.602580 | -0.287528 |
| C | -1.975736 | -0.354970 | -0.725820 |
| C | -3.736851 | -1.989575 | -0.565973 |
| C | -2.828919 | 0.504171  | -1.418551 |
| H | -0.959002 | -0.034113 | -0.490972 |
| C | -4.584983 | -1.144766 | -1.277917 |
| H | -4.101469 | -2.959973 | -0.218267 |
| C | -4.133744 | 0.106831  | -1.702036 |
| H | -2.459927 | 1.490916  | -1.707941 |
| H | -5.608750 | -1.457645 | -1.490217 |
| H | -4.805315 | 0.776022  | -2.241941 |
| C | 1.409617  | -0.583377 | -1.382109 |
| H | 1.014480  | 0.423194  | -1.582784 |
| H | 0.945994  | -1.324853 | -2.046519 |
| N | 2.883272  | -0.574145 | -1.659511 |
| C | 3.539710  | 0.492524  | -0.838489 |
| H | 4.598020  | 0.533462  | -1.127251 |
| H | 3.028611  | 1.442651  | -1.037402 |
| H | 3.406402  | 0.214859  | 0.216094  |
| C | 3.445449  | -1.895379 | -1.258486 |
| H | 3.222708  | -2.013384 | -0.185356 |
| H | 2.958957  | -2.676590 | -1.855256 |
| H | 4.525972  | -1.889680 | -1.448986 |
| C | 3.116161  | -0.308563 | -3.098567 |
| H | 2.683692  | 0.668945  | -3.343797 |
| H | 4.195296  | -0.304349 | -3.294487 |
| H | 2.628282  | -1.091993 | -3.690559 |
| H | 1.281622  | -0.856593 | -0.324720 |

**[P, Approximation: A, Orientation: Upward]**

|    |           |           |           |
|----|-----------|-----------|-----------|
| C  | 1.777844  | 0.954435  | 2.442646  |
| C  | 0.312942  | 1.033144  | 1.920444  |
| O  | 2.611527  | 0.384168  | 1.554455  |
| H  | 2.051543  | 2.006696  | 2.713329  |
| H  | -0.247688 | 1.822633  | 2.442175  |
| S  | -1.178601 | 2.544120  | -1.979587 |
| C  | -0.980486 | 2.149296  | -0.414608 |
| S  | 0.534895  | 1.555458  | 0.171278  |
| Cl | -2.300056 | 2.332121  | 0.730731  |
| H  | 1.692905  | 0.420632  | 3.426009  |
| C  | -0.492224 | -0.253368 | 2.023027  |
| H  | -0.456441 | -0.587275 | 3.079351  |
| H  | -1.548430 | -0.053278 | 1.771688  |
| O  | 0.017367  | -1.262135 | 1.185047  |
| C  | -0.852510 | -2.349121 | 1.032217  |
| H  | -1.159096 | -2.754894 | 2.015578  |
| H  | -0.270769 | -3.135861 | 0.525414  |
| C  | -2.086062 | -2.015980 | 0.214532  |
| C  | -2.013475 | -1.046872 | -0.791069 |
| C  | -3.302180 | -2.660878 | 0.449911  |
| C  | -3.142051 | -0.716727 | -1.538611 |
| H  | -1.066006 | -0.531378 | -0.963504 |
| C  | -4.427773 | -2.349062 | -0.312739 |
| H  | -3.373110 | -3.407833 | 1.244815  |
| C  | -4.351384 | -1.371911 | -1.304436 |
| H  | -3.073754 | 0.067616  | -2.295079 |

|   |           |           |           |
|---|-----------|-----------|-----------|
| H | -5.373057 | -2.858761 | -0.118815 |
| H | -5.236519 | -1.113445 | -1.887611 |
| C | 2.438586  | -1.397989 | -0.716532 |
| H | 1.809156  | -1.106190 | -1.566815 |
| H | 2.514594  | -2.491200 | -0.653170 |
| N | 3.816947  | -0.852377 | -0.940921 |
| C | 3.731421  | 0.638821  | -1.061779 |
| H | 4.739232  | 1.021189  | -1.267591 |
| H | 3.051116  | 0.879784  | -1.888018 |
| H | 3.330872  | 0.987641  | -0.088088 |
| C | 4.646928  | -1.176603 | 0.261902  |
| H | 4.133761  | -0.705566 | 1.122403  |
| H | 4.696662  | -2.268378 | 0.358245  |
| H | 5.652059  | -0.765189 | 0.105242  |
| C | 4.413223  | -1.436405 | -2.162570 |
| H | 3.784017  | -1.178310 | -3.022860 |
| H | 5.421552  | -1.027766 | -2.301743 |
| H | 4.463273  | -2.526380 | -2.051517 |
| H | 2.077814  | -0.948097 | 0.227508  |

**[R, Approximation: A, Orientation: Downward]**

|    |           |           |           |
|----|-----------|-----------|-----------|
| C  | 1.823493  | -1.995519 | 1.297278  |
| C  | 0.846198  | -0.912918 | 1.383750  |
| O  | 0.440698  | -2.252663 | 1.075081  |
| H  | 2.464346  | -2.049194 | 0.411518  |
| H  | 0.793740  | -0.223740 | 0.531230  |
| S  | 1.745037  | 0.047641  | -1.883727 |
| C  | 2.943801  | 0.415436  | -0.779907 |
| S  | 2.981122  | 1.504436  | 0.471932  |
| Cl | 4.451028  | -0.593072 | -0.952392 |
| H  | 2.224517  | -2.428457 | 2.219923  |
| C  | 0.391567  | -0.343097 | 2.699011  |
| H  | 0.187049  | -1.164756 | 3.403090  |
| H  | 1.205991  | 0.277667  | 3.112191  |
| O  | -0.791548 | 0.414011  | 2.570667  |
| C  | -0.600983 | 1.744941  | 2.108886  |
| H  | 0.470968  | 1.956836  | 1.966911  |
| H  | -0.993250 | 2.427388  | 2.881762  |
| C  | -1.319426 | 1.994956  | 0.802823  |
| C  | -2.719976 | 1.943699  | 0.745150  |
| C  | -0.598635 | 2.262196  | -0.364746 |
| C  | -3.388245 | 2.148909  | -0.461261 |
| H  | -3.286306 | 1.754717  | 1.661674  |
| C  | -1.267867 | 2.467710  | -1.574818 |
| H  | 0.495530  | 2.276193  | -0.335171 |
| C  | -2.659086 | 2.410683  | -1.627338 |
| H  | -4.480176 | 2.127959  | -0.491531 |
| H  | -0.683125 | 2.650958  | -2.477513 |
| H  | -3.180651 | 2.580090  | -2.571284 |
| C  | -1.341696 | -1.102548 | -1.209243 |
| H  | -1.348865 | -1.251859 | -2.295797 |
| H  | -0.385736 | -1.432005 | -0.792233 |
| N  | -2.436996 | -1.935157 | -0.608479 |
| C  | -2.116400 | -3.372315 | -0.824557 |
| H  | -1.152967 | -3.570003 | -0.338435 |
| H  | -2.909721 | -3.985498 | -0.380187 |
| H  | -2.047275 | -3.561021 | -1.902272 |
| C  | -3.727441 | -1.577517 | -1.251083 |
| H  | -3.652755 | -1.769017 | -2.327896 |
| H  | -4.528744 | -2.184131 | -0.812367 |
| H  | -3.909809 | -0.510277 | -1.072821 |
| C  | -2.525303 | -1.673026 | 0.862494  |

|   |           |           |           |
|---|-----------|-----------|-----------|
| H | -1.612927 | -2.053457 | 1.331886  |
| H | -2.589967 | -0.592344 | 1.028965  |
| H | -3.411808 | -2.190572 | 1.249113  |
| H | -1.528300 | -0.050704 | -0.966651 |

**[TS, Approximation: A, Orientation: Downward]**

|    |           |           |           |
|----|-----------|-----------|-----------|
| C  | -0.811432 | -2.735272 | -0.425740 |
| C  | -0.661043 | -1.378400 | -0.962183 |
| O  | 0.563754  | -2.675186 | -0.330554 |
| H  | -1.371229 | -2.786531 | 0.524848  |
| H  | -0.412421 | -0.610362 | -0.231955 |
| S  | -1.912000 | -0.124277 | 1.849494  |
| C  | -3.020652 | -0.090824 | 0.626651  |
| S  | -2.831505 | -0.417901 | -1.024747 |
| Cl | -4.686839 | 0.371051  | 1.053997  |
| H  | -1.213821 | -3.476360 | -1.143566 |
| C  | -0.203546 | -1.195988 | -2.392102 |
| H  | 0.278413  | -2.131848 | -2.704478 |
| H  | -1.067619 | -1.014909 | -3.055577 |
| O  | 0.754717  | -0.176668 | -2.551226 |
| C  | 0.259928  | 1.148712  | -2.531107 |
| H  | -0.840553 | 1.155130  | -2.597700 |
| H  | 0.661623  | 1.663868  | -3.419078 |
| C  | 0.692589  | 1.896294  | -1.287918 |
| C  | 2.012269  | 2.352864  | -1.165624 |
| C  | -0.197431 | 2.118766  | -0.234279 |
| C  | 2.435105  | 3.008743  | -0.009792 |
| H  | 2.708300  | 2.201651  | -1.995600 |
| C  | 0.220475  | 2.775852  | 0.925546  |
| H  | -1.226874 | 1.763285  | -0.320984 |
| C  | 1.536647  | 3.220113  | 1.041203  |
| H  | 3.460958  | 3.376269  | 0.065161  |
| H  | -0.491156 | 2.924268  | 1.739246  |
| H  | 1.862193  | 3.741420  | 1.943121  |
| C  | 1.732145  | -0.534647 | 1.482079  |
| H  | 1.781231  | -0.495606 | 2.577251  |
| H  | 0.926501  | -1.194920 | 1.140364  |
| N  | 3.014590  | -1.121340 | 0.973453  |
| C  | 3.080908  | -2.550791 | 1.396965  |
| H  | 2.212551  | -3.053973 | 0.944247  |
| H  | 4.025011  | -2.978029 | 1.037398  |
| H  | 3.038978  | -2.591820 | 2.492204  |
| C  | 4.160352  | -0.351361 | 1.513082  |
| H  | 4.152289  | -0.416328 | 2.607666  |
| H  | 5.093529  | -0.770189 | 1.117552  |
| H  | 4.049536  | 0.694219  | 1.198961  |
| C  | 3.029713  | -1.065621 | -0.523352 |
| H  | 2.179229  | -1.659653 | -0.882150 |
| H  | 2.910112  | -0.021964 | -0.831560 |
| H  | 3.989573  | -1.471659 | -0.866216 |
| H  | 1.619939  | 0.474570  | 1.066448  |

**[P, Approximation: A, Orientation: Downward]**

|    |           |           |           |
|----|-----------|-----------|-----------|
| C  | 0.599033  | -2.643240 | 0.407913  |
| C  | 0.821268  | -1.194339 | 0.951404  |
| O  | -0.710255 | -2.848615 | 0.215451  |
| H  | 1.241644  | -2.732394 | -0.504057 |
| H  | 0.307175  | -0.494408 | 0.278688  |
| S  | 1.813745  | -0.194765 | -1.960336 |
| C  | 2.853223  | -0.257519 | -0.718183 |
| S  | 2.580226  | -0.693838 | 0.934531  |
| Cl | 4.540557  | 0.202715  | -0.913157 |

|   |           |           |           |
|---|-----------|-----------|-----------|
| H | 1.085540  | -3.320364 | 1.164047  |
| C | 0.248467  | -1.053134 | 2.367290  |
| H | -0.400313 | -1.925581 | 2.526225  |
| H | 1.053182  | -1.082788 | 3.128285  |
| O | -0.578015 | 0.070020  | 2.580295  |
| C | 0.025471  | 1.337885  | 2.455513  |
| H | 1.125681  | 1.260909  | 2.453233  |
| H | -0.267623 | 1.932195  | 3.336678  |
| C | -0.443161 | 2.045616  | 1.201365  |
| C | -1.781839 | 2.446468  | 1.091999  |
| C | 0.415482  | 2.269927  | 0.124164  |
| C | -2.250640 | 3.051309  | -0.072822 |
| H | -2.455513 | 2.286206  | 1.938059  |
| C | -0.050489 | 2.868461  | -1.048909 |
| H | 1.461257  | 1.962979  | 0.201699  |
| C | -1.384299 | 3.258394  | -1.150788 |
| H | -3.291132 | 3.377148  | -0.137923 |
| H | 0.635245  | 3.020868  | -1.883986 |
| H | -1.748341 | 3.733377  | -2.063279 |
| C | -1.778986 | -0.608049 | -1.433616 |
| H | -1.915958 | -0.585778 | -2.522319 |
| H | -1.010420 | -1.334189 | -1.124345 |
| N | -3.048129 | -1.100208 | -0.809009 |
| C | -3.243507 | -2.523327 | -1.224969 |
| H | -2.348780 | -3.069815 | -0.874414 |
| H | -4.161070 | -2.896885 | -0.753649 |
| H | -3.340135 | -2.553210 | -2.317597 |
| C | -4.185131 | -0.253310 | -1.230788 |
| H | -4.281550 | -0.296383 | -2.322672 |
| H | -5.103174 | -0.622916 | -0.757883 |
| H | -3.983877 | 0.777518  | -0.912819 |
| C | -2.899013 | -1.067771 | 0.683232  |
| H | -2.066999 | -1.768464 | 0.904939  |
| H | -2.640896 | -0.047319 | 0.987563  |
| H | -3.853342 | -1.383405 | 1.123960  |
| H | -1.565811 | 0.400181  | -1.051638 |

**[R, Approximation: B, Orientation: Upward]**

|    |           |           |           |
|----|-----------|-----------|-----------|
| C  | 0.807469  | -0.244124 | -2.328712 |
| C  | -0.411536 | -1.020010 | -2.598686 |
| O  | -0.467920 | 0.364441  | -2.298152 |
| H  | -0.820882 | -1.678819 | -1.822553 |
| S  | -3.421834 | -2.307464 | -0.986115 |
| C  | -2.953414 | -1.678062 | 0.456005  |
| Cl | -4.335787 | -0.985568 | 1.479848  |
| S  | -1.440984 | -1.482512 | 1.151790  |
| H  | 1.433256  | 0.075251  | -3.171026 |
| C  | 1.500681  | -0.375931 | -1.007845 |
| H  | 2.368211  | -1.053199 | -1.111277 |
| H  | 0.800388  | -0.819547 | -0.275857 |
| O  | 1.917817  | 0.905029  | -0.577879 |
| C  | 2.565924  | 0.877016  | 0.667311  |
| H  | 1.950080  | 0.340234  | 1.415332  |
| H  | 2.647643  | 1.926680  | 0.992267  |
| C  | 3.947832  | 0.259952  | 0.609399  |
| C  | 4.439207  | -0.507643 | 1.666816  |
| C  | 4.758279  | 0.478717  | -0.509528 |
| C  | 5.728867  | -1.037433 | 1.617047  |
| H  | 3.804612  | -0.699287 | 2.535489  |
| C  | 6.042812  | -0.056707 | -0.564645 |
| H  | 4.361824  | 1.065619  | -1.340783 |
| C  | 6.532942  | -0.813008 | 0.501215  |



|   |           |           |           |
|---|-----------|-----------|-----------|
| H | 6.101868  | -1.636984 | 2.448811  |
| H | 6.666587  | 0.116201  | -1.443202 |
| H | 7.539020  | -1.232757 | 0.458078  |
| H | -0.658087 | -1.278476 | -3.632898 |
| C | -0.706683 | 2.107370  | 0.117340  |
| H | -0.238518 | 2.814447  | 0.813417  |
| H | -0.388504 | 2.286810  | -0.913684 |
| N | -2.190986 | 2.260365  | 0.212542  |
| C | -2.582245 | 3.656540  | -0.099140 |
| H | -3.675778 | 3.730586  | -0.069799 |
| H | -2.139951 | 4.328309  | 0.646106  |
| H | -2.215100 | 3.911270  | -1.099925 |
| C | -2.622884 | 1.914237  | 1.600608  |
| H | -2.132569 | 2.610593  | 2.292043  |
| H | -3.713107 | 2.003298  | 1.663798  |
| H | -2.327121 | 0.875315  | 1.807531  |
| C | -2.835384 | 1.328827  | -0.771288 |
| H | -2.643311 | 1.710220  | -1.779854 |
| H | -2.365057 | 0.347343  | -0.670427 |
| H | -3.906886 | 1.263676  | -0.548448 |
| H | -0.468609 | 1.070718  | 0.383714  |

**[TS, Approximation: B, Orientation: Upward]**

|    |           |           |           |
|----|-----------|-----------|-----------|
| C  | -0.498350 | -1.062377 | 1.227663  |
| C  | 0.307838  | -2.258229 | 0.941347  |
| O  | 0.628289  | -0.311393 | 1.438922  |
| H  | 0.410093  | -2.592369 | -0.094421 |
| S  | 2.706562  | -2.222574 | 0.932774  |
| C  | 3.028006  | -1.502209 | -0.537634 |
| Cl | 4.731466  | -0.858365 | -0.626542 |
| S  | 2.074303  | -1.229313 | -1.855974 |
| H  | -1.159769 | -1.168110 | 2.119951  |
| C  | -1.366247 | -0.628221 | 0.053851  |
| H  | -2.212992 | -1.330669 | -0.072928 |
| H  | -0.760347 | -0.646534 | -0.874466 |
| O  | -1.844109 | 0.680287  | 0.290025  |
| C  | -2.810987 | 1.097307  | -0.629908 |
| H  | -2.482837 | 0.897356  | -1.668687 |
| H  | -2.897448 | 2.190763  | -0.518349 |
| C  | -4.171347 | 0.468166  | -0.400055 |
| C  | -5.077565 | 0.316045  | -1.451965 |
| C  | -4.545092 | 0.064144  | 0.884942  |
| C  | -6.345002 | -0.218619 | -1.223676 |
| H  | -4.787126 | 0.614849  | -2.462479 |
| C  | -5.808365 | -0.478282 | 1.113107  |
| H  | -3.825238 | 0.172001  | 1.698696  |
| C  | -6.713317 | -0.617475 | 0.060569  |
| H  | -7.044082 | -0.333267 | -2.053686 |
| H  | -6.088832 | -0.795077 | 2.119086  |
| H  | -7.702077 | -1.042460 | 0.239756  |
| H  | 0.400931  | -3.031892 | 1.704854  |
| C  | 0.872752  | 1.940135  | -0.240978 |
| H  | 0.575806  | 2.620353  | -1.050166 |
| H  | 0.154482  | 1.930091  | 0.583792  |
| N  | 2.208791  | 2.394984  | 0.261348  |
| C  | 2.091894  | 3.784367  | 0.767979  |
| H  | 3.079058  | 4.131192  | 1.095978  |
| H  | 1.713450  | 4.428287  | -0.034653 |
| H  | 1.392532  | 3.786755  | 1.611629  |
| C  | 3.189655  | 2.340471  | -0.859374 |
| H  | 2.883749  | 3.061869  | -1.626846 |
| H  | 4.184858  | 2.590179  | -0.472378 |

|   |          |          |           |
|---|----------|----------|-----------|
| H | 3.192211 | 1.322597 | -1.271269 |
| C | 2.678686 | 1.509043 | 1.376176  |
| H | 1.870288 | 1.400246 | 2.106316  |
| H | 2.876527 | 0.510306 | 0.979693  |
| H | 3.587798 | 1.958646 | 1.794385  |
| H | 0.979886 | 0.905646 | -0.584659 |

**[P, Approximation: B, Orientation: Upward]**

|    |           |           |           |
|----|-----------|-----------|-----------|
| C  | 0.303534  | -0.571351 | -0.319227 |
| C  | -0.190317 | -1.939712 | 0.233955  |
| O  | -0.654669 | 0.361072  | -0.273018 |
| H  | -0.444716 | -1.864749 | 1.301459  |
| S  | -1.693984 | -2.432681 | -0.643816 |
| C  | -2.975398 | -1.800968 | 0.319336  |
| Cl | -4.483969 | -1.958337 | -0.601798 |
| S  | -2.983461 | -1.177919 | 1.812861  |
| H  | 0.679969  | -0.781517 | -1.358185 |
| C  | 1.548929  | -0.188943 | 0.487313  |
| H  | 2.300690  | -1.004014 | 0.487317  |
| H  | 1.245243  | 0.004107  | 1.536546  |
| O  | 2.098973  | 0.982151  | -0.069883 |
| C  | 3.266140  | 1.411018  | 0.559286  |
| H  | 3.141134  | 1.438309  | 1.659960  |
| H  | 3.438660  | 2.447855  | 0.226712  |
| C  | 4.486174  | 0.576974  | 0.214550  |
| C  | 5.577550  | 0.507767  | 1.083638  |
| C  | 4.544255  | -0.104537 | -1.004612 |
| C  | 6.716056  | -0.219204 | 0.737460  |
| H  | 5.534524  | 1.026272  | 2.045070  |
| C  | 5.677850  | -0.838571 | -1.348867 |
| H  | 3.680479  | -0.056388 | -1.670888 |
| C  | 6.768707  | -0.895148 | -0.480891 |
| H  | 7.561939  | -0.265235 | 1.425525  |
| H  | 5.710894  | -1.370634 | -2.301292 |
| H  | 7.655970  | -1.469894 | -0.751029 |
| H  | 0.522156  | -2.764232 | 0.079185  |
| C  | -1.463049 | 3.001075  | -0.973433 |
| H  | -1.096417 | 3.909266  | -0.478755 |
| H  | -1.725085 | 3.217827  | -2.016616 |
| N  | -2.706831 | 2.557344  | -0.264189 |
| C  | -3.722659 | 3.633297  | -0.268413 |
| H  | -4.623773 | 3.273688  | 0.242862  |
| H  | -3.320020 | 4.509213  | 0.254651  |
| H  | -3.962170 | 3.895521  | -1.306068 |
| C  | -2.339178 | 2.192142  | 1.141179  |
| H  | -1.930127 | 3.086759  | 1.627744  |
| H  | -3.246458 | 1.852420  | 1.655939  |
| H  | -1.589032 | 1.381897  | 1.049728  |
| C  | -3.242567 | 1.335988  | -0.950109 |
| H  | -3.546503 | 1.621360  | -1.965124 |
| H  | -2.409265 | 0.605186  | -0.946831 |
| H  | -4.104821 | 0.967370  | -0.379417 |
| H  | -0.749430 | 2.154772  | -0.887125 |

**[R, Approximation: B, Orientation: Downward]**

|   |           |           |           |
|---|-----------|-----------|-----------|
| C | -0.280438 | -3.375569 | -0.309461 |
| C | 1.180250  | -3.257612 | -0.425393 |
| O | 0.503260  | -2.914502 | 0.771881  |
| H | 1.613641  | -2.415500 | -0.981613 |
| H | 1.789253  | -4.164739 | -0.366577 |
| S | 1.307010  | 0.013622  | -2.550247 |
| C | 2.186857  | 0.618038  | -1.292000 |

|    |           |           |           |
|----|-----------|-----------|-----------|
| Cl | 1.815096  | 2.387328  | -0.874556 |
| S  | 3.328334  | -0.094116 | -0.307011 |
| H  | -0.726951 | -4.363987 | -0.147283 |
| C  | -1.171298 | -2.362172 | -0.962818 |
| H  | -1.496120 | -2.743162 | -1.951032 |
| H  | -0.593087 | -1.438128 | -1.141504 |
| O  | -2.291339 | -2.135159 | -0.138263 |
| C  | -3.260037 | -1.275936 | -0.702358 |
| H  | -4.186977 | -1.447509 | -0.137821 |
| H  | -3.442037 | -1.558925 | -1.755578 |
| C  | -2.869621 | 0.183372  | -0.620207 |
| C  | -2.029393 | 0.754768  | -1.582004 |
| C  | -3.278968 | 0.964982  | 0.466745  |
| C  | -1.572567 | 2.065706  | -1.447216 |
| H  | -1.696910 | 0.167268  | -2.440347 |
| C  | -2.847999 | 2.286038  | 0.593600  |
| H  | -3.944832 | 0.531594  | 1.217843  |
| C  | -1.984170 | 2.834559  | -0.358512 |
| H  | -0.866022 | 2.463084  | -2.176860 |
| H  | -3.190264 | 2.892533  | 1.435105  |
| H  | -1.629569 | 3.861327  | -0.252956 |
| N  | 0.539807  | 0.296872  | 2.428795  |
| C  | 1.432506  | 1.492486  | 2.369772  |
| H  | 0.842154  | 2.350185  | 2.027303  |
| H  | 2.235141  | 1.288876  | 1.646058  |
| H  | 1.837720  | 1.668999  | 3.374032  |
| C  | 1.336092  | -0.886843 | 2.865768  |
| H  | 1.701575  | -0.704245 | 3.883840  |
| H  | 2.169177  | -1.001401 | 2.160075  |
| H  | 0.702344  | -1.778135 | 2.811678  |
| C  | -0.033940 | 0.028642  | 1.069989  |
| H  | -0.423203 | 0.971178  | 0.668514  |
| H  | -0.825700 | -0.723567 | 1.166783  |
| H  | 0.770632  | -0.358382 | 0.438287  |
| C  | -0.574841 | 0.547382  | 3.375634  |
| H  | -0.162740 | 0.809290  | 4.357707  |
| H  | -1.184119 | -0.361074 | 3.447298  |
| H  | -1.183864 | 1.369897  | 2.980869  |

**[TS, Approximation: B, Orientation: Downward]**

|    |           |           |           |
|----|-----------|-----------|-----------|
| C  | -0.542054 | 0.982457  | 1.892044  |
| C  | -1.456651 | -0.153447 | 1.756277  |
| O  | 0.376556  | -0.043098 | 2.030570  |
| H  | -1.419842 | -0.707594 | 0.821058  |
| H  | -1.777660 | -0.658128 | 2.665993  |
| S  | -3.625256 | 0.467132  | 1.110135  |
| C  | -3.625238 | -0.077912 | -0.486183 |
| Cl | -5.065200 | 0.447736  | -1.392917 |
| S  | -2.536243 | -1.005119 | -1.330144 |
| H  | -0.680724 | 1.607321  | 2.794291  |
| C  | -0.422719 | 1.864196  | 0.668095  |
| H  | -1.375461 | 2.401011  | 0.509255  |
| H  | -0.252941 | 1.223518  | -0.217009 |
| O  | 0.630542  | 2.789450  | 0.838614  |
| C  | 1.390171  | 3.025459  | -0.305803 |
| H  | 1.867594  | 4.010281  | -0.174705 |
| H  | 0.759045  | 3.092881  | -1.211489 |
| C  | 2.482095  | 1.991866  | -0.508054 |
| C  | 2.991006  | 1.712697  | -1.779832 |
| C  | 3.043835  | 1.359807  | 0.606853  |
| C  | 4.066767  | 0.837396  | -1.939251 |
| H  | 2.546186  | 2.192264  | -2.655471 |

|   |           |           |           |
|---|-----------|-----------|-----------|
| C | 4.131865  | 0.502730  | 0.449773  |
| H | 2.602460  | 1.540922  | 1.588337  |
| C | 4.648810  | 0.238092  | -0.821060 |
| H | 4.459187  | 0.633995  | -2.937193 |
| H | 4.585850  | 0.042103  | 1.330116  |
| H | 5.508856  | -0.424126 | -0.939702 |
| N | 1.388335  | -2.561776 | 0.117587  |
| C | 1.859149  | -3.623242 | -0.804354 |
| H | 2.779684  | -3.282566 | -1.293007 |
| H | 1.081790  | -3.804795 | -1.555895 |
| H | 2.050681  | -4.539044 | -0.232077 |
| C | 0.104446  | -2.973367 | 0.762671  |
| H | 0.234186  | -3.979218 | 1.180675  |
| H | -0.697161 | -2.952742 | 0.012324  |
| H | -0.104601 | -2.238001 | 1.547810  |
| C | 1.181394  | -1.283764 | -0.639584 |
| H | 2.135412  | -0.996038 | -1.101381 |
| H | 0.870969  | -0.540816 | 0.109615  |
| H | 0.398147  | -1.443701 | -1.390447 |
| C | 2.394255  | -2.313675 | 1.192534  |
| H | 2.483911  | -3.222722 | 1.800343  |
| H | 2.027980  | -1.463786 | 1.788933  |
| H | 3.350909  | -2.068884 | 0.718026  |

**[P, Approximation: B, Orientation: Downward]**

|    |           |           |           |
|----|-----------|-----------|-----------|
| C  | 0.751043  | 0.140439  | 0.364432  |
| C  | 1.911285  | 1.162022  | 0.255361  |
| O  | -0.381981 | 0.699417  | -0.117020 |
| H  | 2.163539  | 1.361580  | -0.796416 |
| H  | 1.572321  | 2.097094  | 0.723278  |
| S  | 3.437707  | 0.735804  | 1.144768  |
| C  | 4.490152  | 0.092410  | -0.072936 |
| Cl | 6.002987  | -0.375446 | 0.697826  |
| S  | 4.255457  | -0.096486 | -1.661526 |
| H  | 0.685170  | -0.134359 | 1.454086  |
| C  | 1.124232  | -1.162230 | -0.349905 |
| H  | 2.066812  | -1.578474 | 0.039958  |
| H  | 1.261237  | -0.951271 | -1.427361 |
| O  | 0.140301  | -2.157542 | -0.159034 |
| C  | -0.957051 | -2.119002 | -1.018453 |
| H  | -0.971380 | -3.031537 | -1.645204 |
| H  | -0.888140 | -1.248666 | -1.694115 |
| C  | -2.271419 | -2.028230 | -0.276336 |
| C  | -3.469972 | -2.335295 | -0.929193 |
| C  | -2.313911 | -1.591516 | 1.049662  |
| C  | -4.695571 | -2.188685 | -0.279194 |
| H  | -3.442241 | -2.697201 | -1.960772 |
| C  | -3.537901 | -1.452824 | 1.704542  |
| H  | -1.369678 | -1.366503 | 1.546190  |
| C  | -4.733784 | -1.742181 | 1.043050  |
| H  | -5.622003 | -2.437330 | -0.800335 |
| H  | -3.559452 | -1.124635 | 2.746335  |
| H  | -5.688983 | -1.642704 | 1.561894  |
| N  | -2.975279 | 2.338552  | -0.234538 |
| C  | -4.229721 | 3.122692  | -0.271785 |
| H  | -5.033424 | 2.525686  | 0.175683  |
| H  | -4.475237 | 3.356996  | -1.314772 |
| H  | -4.090334 | 4.049959  | 0.297111  |
| C  | -1.848771 | 3.106031  | -0.850677 |
| H  | -1.715744 | 4.036818  | -0.285071 |
| H  | -2.115037 | 3.330843  | -1.890936 |
| H  | -0.963013 | 2.445783  | -0.778810 |

|   |           |          |           |
|---|-----------|----------|-----------|
| C | -3.138001 | 1.055259 | -0.990862 |
| H | -3.920682 | 0.458958 | -0.503469 |
| H | -2.161074 | 0.546710 | -0.929590 |
| H | -3.422040 | 1.300181 | -2.022150 |
| C | -2.604034 | 2.003882 | 1.177629  |
| H | -2.472963 | 2.944415 | 1.727772  |
| H | -1.661460 | 1.421373 | 1.089154  |
| H | -3.416648 | 1.408256 | 1.610814  |

Neutral reaction (using Choline as a counter cation):

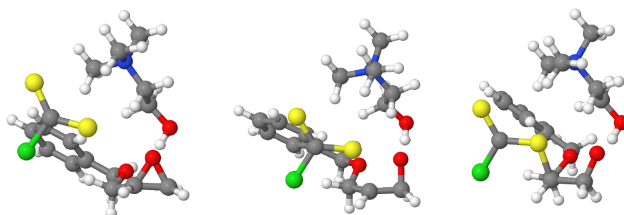

**Figure S17.** Reactant (left), transition state (center) and product (right) of the reaction between  $\text{CS}_2\text{Cl}^-$  + Choline and R1i (upward attack to  $\text{C}_A$ ).

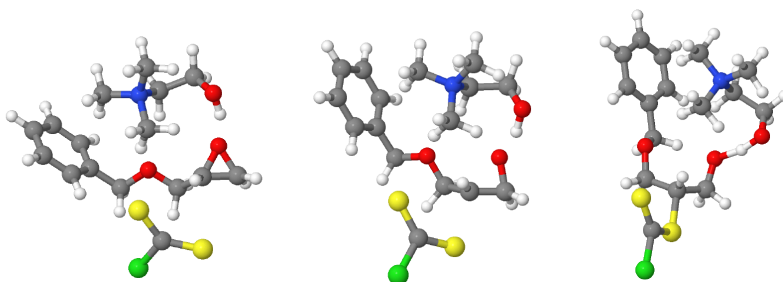

**Figure S18.** Reactant (left), transition state (center) and product (right) of the reaction between  $\text{CS}_2\text{Cl}^-$  + Choline and R1i (downward attack to  $\text{C}_A$ ).

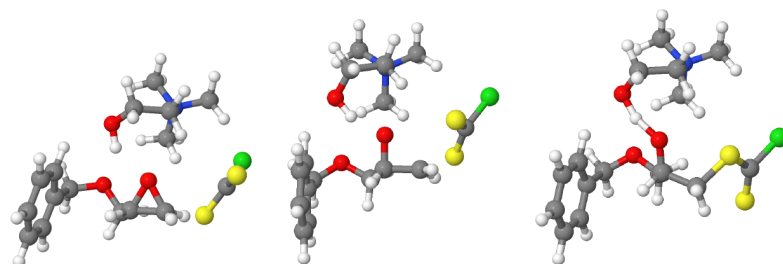

**Figure S19.** Reactant (left), transition state (center) and product (right) of the reaction between  $\text{CS}_2\text{Cl}^-$  + Choline and R1i (upward attack to  $\text{C}_B$ ).

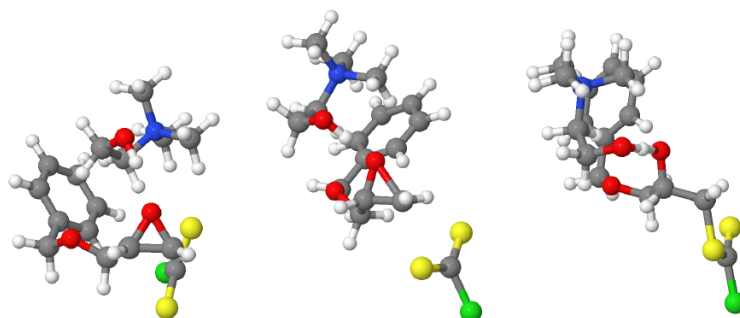

**Figure S20.** Reactant (left), transition state (center) and product (right) of the reaction between  $\text{CS}_2\text{Cl}^-$  + Choline and R1i (downward attack to  $\text{C}_B$ ).

| Approximation | Orientation | R   | TS   | P    |
|---------------|-------------|-----|------|------|
| A             | upward      | 0.0 | 49.4 | 9.4  |
| A             | downward    | 0.0 | 22.6 | -4.9 |
| B             | upward      | 0.0 | 47.0 | -1.9 |
| B             | downward    | 0.0 | 29.5 | -2.9 |

**Table S3.** Energies of the reactants (R), transition state (TS) and products (P) involved in the gas-phase reaction between  $\text{CS}_2\text{Cl}^-$  + Choline and R1i across various approximations and orientations. All energies are reported, relative to the reactant complex, as the Morokuma-corrected Gibbs free energies (373.15 K).

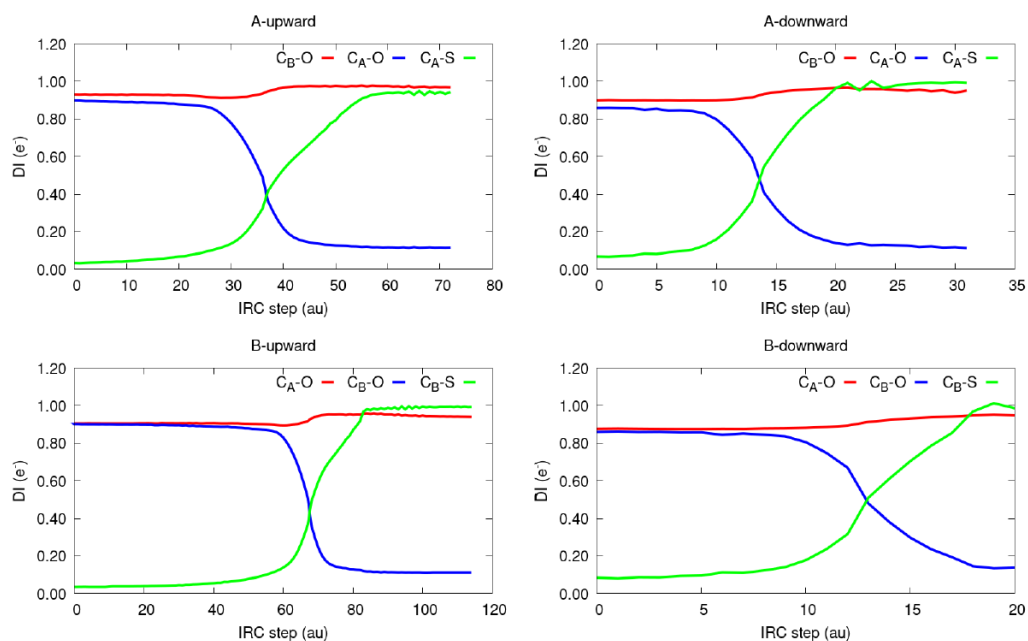

**Figure S21.** Evolution of the electron delocalization (DI) across the gas-phase reaction coordinate attributed to the nucleophilic attack of  $\text{CS}_2\text{Cl}^-$  + Choline to R1i. The results for different spatial approximations are shown. All values are reported in electron pairs.

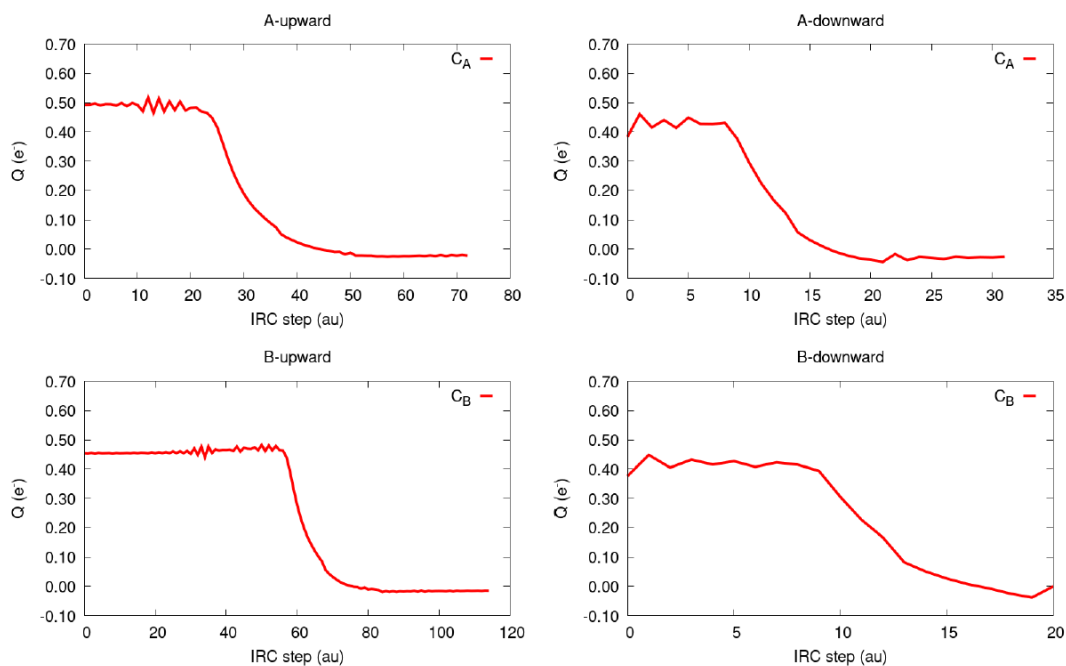

**Figure S22.** Evolution of the atomic charges (Q) of the electrophilic carbon across the gas-phase reaction coordinate attributed to the nucleophilic attack of  $\text{CS}_2\text{Cl}^-$  + Choline to R1i. The results for different spatial approximations are shown. All values are reported in electrons.

The upcoming section comprises the optimized geometries of the reactants (R), transition state (TS) and product (P) involved in the reaction across different approximations and orientations. All values are reported as XYZ Cartesian Coordinates in Angstroms.

**[R, Approximation: A, Orientation: Upward]**

|    |           |           |           |
|----|-----------|-----------|-----------|
| C  | -1.249424 | 3.430123  | 2.246682  |
| C  | -0.429916 | 2.238005  | 2.498818  |
| O  | -1.604370 | 2.163017  | 1.725780  |
| H  | -1.906909 | 3.815632  | 3.031718  |
| H  | -0.490923 | 1.741054  | 3.472605  |
| S  | -0.294360 | -3.564185 | 0.608898  |
| C  | -0.000512 | -2.226007 | 1.541845  |
| S  | -1.005424 | -0.945583 | 1.945126  |
| Cl | 1.669868  | -2.089909 | 2.224880  |
| H  | -0.909526 | 4.160218  | 1.503230  |
| C  | 0.870041  | 2.012492  | 1.759609  |
| H  | 1.662558  | 2.646628  | 2.199466  |
| H  | 1.168010  | 0.955678  | 1.859737  |
| O  | 0.649796  | 2.369894  | 0.414653  |
| C  | 1.774448  | 2.523754  | -0.408914 |
| H  | 2.551555  | 3.114346  | 0.112138  |
| H  | 1.430319  | 3.122603  | -1.267793 |
| C  | 2.370485  | 1.222796  | -0.908199 |
| C  | 1.807224  | -0.013195 | -0.589010 |
| C  | 3.505166  | 1.262315  | -1.727562 |
| C  | 2.370985  | -1.198312 | -1.071619 |
| H  | 0.931135  | -0.055939 | 0.062943  |
| C  | 4.060519  | 0.085461  | -2.221021 |
| H  | 3.957118  | 2.225278  | -1.980677 |
| C  | 3.494429  | -1.149152 | -1.892869 |
| H  | 1.931248  | -2.155326 | -0.776943 |
| H  | 4.944730  | 0.129122  | -2.859208 |
| H  | 3.939291  | -2.072173 | -2.267485 |
| C  | -2.380761 | 0.649271  | -1.061777 |
| N  | -2.525729 | -0.733925 | -1.649119 |
| C  | -3.316117 | -1.573145 | -0.693491 |
| H  | -3.460574 | -2.562941 | -1.141848 |
| H  | -2.743542 | -1.658570 | 0.243396  |
| H  | -4.279293 | -1.077623 | -0.522269 |
| C  | -3.232032 | -0.681905 | -2.954068 |
| H  | -4.227793 | -0.249607 | -2.801318 |
| H  | -2.660112 | -0.068002 | -3.657291 |
| H  | -3.321733 | -1.703081 | -3.342690 |
| C  | -1.179994 | -1.359590 | -1.826815 |
| H  | -0.652558 | -1.296841 | -0.868784 |
| H  | -1.316850 | -2.415488 | -2.084752 |
| H  | -0.633771 | -0.830561 | -2.615530 |
| C  | -1.419281 | 1.579273  | -1.804255 |
| H  | -2.035224 | 0.519015  | -0.025129 |
| H  | -3.383260 | 1.099372  | -1.045081 |
| O  | -1.490535 | 2.842529  | -1.226884 |
| H  | -1.699324 | 1.680230  | -2.865945 |
| H  | -0.393794 | 1.170055  | -1.762661 |
| H  | -1.022571 | 2.772508  | -0.375874 |

**[TS, Approximation: A, Orientation: Upward]**

|   |           |           |          |
|---|-----------|-----------|----------|
| C | 0.959071  | -2.240911 | 2.913317 |
| C | -0.079760 | -1.219158 | 2.740976 |
| O | 1.650741  | -1.761412 | 1.820263 |
| H | 1.503346  | -2.166105 | 3.874407 |
| H | -0.282620 | -0.466322 | 3.504754 |
| S | 0.170424  | 3.401751  | 0.287305 |
| C | -0.095569 | 2.153974  | 1.329550 |



|    |           |           |           |
|----|-----------|-----------|-----------|
| S  | 0.935282  | 0.863662  | 1.683391  |
| Cl | -1.677782 | 2.088503  | 2.174347  |
| H  | 0.569804  | -3.276521 | 2.809863  |
| C  | -1.224890 | -1.470003 | 1.821434  |
| H  | -1.922507 | -2.110602 | 2.412742  |
| H  | -1.757585 | -0.531273 | 1.601508  |
| O  | -0.809268 | -2.136328 | 0.670824  |
| C  | -1.818742 | -2.467585 | -0.238549 |
| H  | -2.634131 | -3.026198 | 0.261404  |
| H  | -1.344736 | -3.155156 | -0.956523 |
| C  | -2.405771 | -1.277132 | -0.975623 |
| C  | -1.812064 | -0.014304 | -0.903134 |
| C  | -3.556741 | -1.437500 | -1.753904 |
| C  | -2.364114 | 1.075223  | -1.579166 |
| H  | -0.924253 | 0.118723  | -0.281345 |
| C  | -4.097769 | -0.358121 | -2.449146 |
| H  | -4.036848 | -2.417942 | -1.813307 |
| C  | -3.505823 | 0.903129  | -2.359713 |
| H  | -1.903979 | 2.060020  | -1.465826 |
| H  | -4.995485 | -0.498349 | -3.053657 |
| H  | -3.943403 | 1.752083  | -2.887028 |
| C  | 2.722475  | -0.840626 | -0.831151 |
| N  | 2.780041  | 0.427512  | -1.663308 |
| C  | 3.516127  | 1.470536  | -0.889326 |
| H  | 3.675966  | 2.341030  | -1.537361 |
| H  | 2.899380  | 1.749079  | -0.024260 |
| H  | 4.474705  | 1.048582  | -0.565136 |
| C  | 3.488651  | 0.155110  | -2.939348 |
| H  | 4.527255  | -0.115169 | -2.717108 |
| H  | 2.989769  | -0.674884 | -3.451633 |
| H  | 3.458001  | 1.055732  | -3.564254 |
| C  | 1.410036  | 0.947187  | -1.959011 |
| H  | 0.880254  | 1.069644  | -1.008137 |
| H  | 1.512311  | 1.924354  | -2.445819 |
| H  | 0.885979  | 0.241598  | -2.612321 |
| C  | 1.626381  | -1.837949 | -1.219120 |
| H  | 2.560665  | -0.546680 | 0.214135  |
| H  | 3.707453  | -1.319781 | -0.921378 |
| O  | 1.772853  | -2.968281 | -0.443621 |
| H  | 1.710277  | -2.118863 | -2.286552 |
| H  | 0.641330  | -1.358551 | -1.071144 |
| H  | 1.636153  | -2.645224 | 0.503865  |

**[P, Approximation: A, Orientation: Upward]**

|    |           |           |           |
|----|-----------|-----------|-----------|
| C  | 1.134942  | 1.591821  | 2.827830  |
| C  | -0.024312 | 1.945288  | 1.840291  |
| O  | 1.923057  | 0.612193  | 2.335620  |
| H  | 1.687032  | 2.544756  | 3.008673  |
| H  | -0.339082 | 2.996535  | 1.896883  |
| S  | 0.169988  | 2.112904  | -2.594626 |
| C  | -0.182474 | 2.352988  | -1.016561 |
| S  | 0.814132  | 1.679199  | 0.222245  |
| Cl | -1.569957 | 3.314213  | -0.551439 |
| H  | 0.630276  | 1.350478  | 3.795152  |
| C  | -1.229891 | 1.033523  | 1.988907  |
| H  | -1.695348 | 1.244980  | 2.972825  |
| H  | -1.991159 | 1.233417  | 1.211576  |
| O  | -0.773266 | -0.285693 | 1.937432  |
| C  | -1.739869 | -1.288212 | 1.961421  |
| H  | -2.503236 | -1.092249 | 2.739351  |
| H  | -1.200760 | -2.203980 | 2.254490  |
| C  | -2.423294 | -1.497327 | 0.621645  |

|   |           |           |           |
|---|-----------|-----------|-----------|
| C | -1.930793 | -0.888839 | -0.536440 |
| C | -3.545036 | -2.326179 | 0.520197  |
| C | -2.546566 | -1.098452 | -1.770872 |
| H | -1.062791 | -0.232435 | -0.454871 |
| C | -4.154525 | -2.548757 | -0.713033 |
| H | -3.946044 | -2.802652 | 1.418597  |
| C | -3.658259 | -1.934029 | -1.863844 |
| H | -2.158188 | -0.591944 | -2.657139 |
| H | -5.028352 | -3.199513 | -0.775960 |
| H | -4.144161 | -2.098990 | -2.826643 |
| C | 2.721106  | -1.277876 | 0.344704  |
| N | 2.810562  | -1.367718 | -1.173421 |
| C | 3.597364  | -0.202364 | -1.665093 |
| H | 3.790089  | -0.327314 | -2.738188 |
| H | 3.007055  | 0.705800  | -1.490749 |
| H | 4.538997  | -0.156732 | -1.106069 |
| C | 3.489186  | -2.633410 | -1.552289 |
| H | 4.519694  | -2.606509 | -1.180745 |
| H | 2.950851  | -3.468634 | -1.090525 |
| H | 3.482357  | -2.735438 | -2.644453 |
| C | 1.462134  | -1.326951 | -1.814818 |
| H | 0.942819  | -0.422420 | -1.479630 |
| H | 1.603056  | -1.290121 | -2.902260 |
| H | 0.895610  | -2.219378 | -1.529849 |
| C | 1.533039  | -2.001101 | 0.991728  |
| H | 2.655756  | -0.218580 | 0.635357  |
| H | 3.663672  | -1.686730 | 0.734934  |
| O | 1.619238  | -1.840846 | 2.348850  |
| H | 1.549474  | -3.080836 | 0.731844  |
| H | 0.599898  | -1.575595 | 0.571183  |
| H | 1.653155  | -0.793138 | 2.494863  |

**[R, Approximation: A, Orientation: Downward]**

|    |           |           |           |
|----|-----------|-----------|-----------|
| C  | -2.158167 | 2.839766  | 1.519041  |
| C  | -1.533794 | 1.658968  | 0.927985  |
| O  | -0.745799 | 2.781066  | 1.350214  |
| H  | -2.685176 | 3.535393  | 0.861222  |
| H  | -1.609663 | 1.520519  | -0.157538 |
| S  | -1.662183 | -0.767311 | -1.777191 |
| C  | -3.098309 | -0.705230 | -0.925069 |
| S  | -4.173534 | 0.522644  | -0.697523 |
| Cl | -3.515222 | -2.277185 | -0.057083 |
| H  | -2.492047 | 2.812600  | 2.560357  |
| C  | -1.355328 | 0.403034  | 1.722137  |
| H  | -1.341451 | 0.640033  | 2.802821  |
| H  | -2.217668 | -0.254068 | 1.515119  |
| O  | -0.148508 | -0.223275 | 1.343807  |
| C  | -0.191077 | -1.629362 | 1.515947  |
| H  | -1.064483 | -2.036257 | 0.980249  |
| H  | -0.293589 | -1.868268 | 2.591250  |
| C  | 1.074710  | -2.233142 | 0.972285  |
| C  | 1.099807  | -2.747757 | -0.329710 |
| C  | 2.242922  | -2.259141 | 1.743222  |
| C  | 2.280171  | -3.283152 | -0.847860 |
| H  | 0.184024  | -2.707620 | -0.927641 |
| C  | 3.423768  | -2.789971 | 1.223700  |
| H  | 2.219341  | -1.866912 | 2.763011  |
| C  | 3.442917  | -3.302722 | -0.075291 |
| H  | 2.289372  | -3.694471 | -1.858887 |
| H  | 4.326998  | -2.816595 | 1.835837  |
| H  | 4.361844  | -3.731657 | -0.479038 |
| H  | 0.224466  | 3.639910  | 0.192819  |

|   |          |           |           |
|---|----------|-----------|-----------|
| O | 1.051164 | 3.876206  | -0.276571 |
| C | 2.098484 | 3.420149  | 0.519980  |
| H | 3.013693 | 3.944518  | 0.203797  |
| H | 1.949414 | 3.658857  | 1.587612  |
| C | 2.319269 | 1.911551  | 0.456201  |
| H | 3.265801 | 1.665296  | 0.959282  |
| H | 1.507083 | 1.351174  | 0.944958  |
| N | 2.407712 | 1.351875  | -0.950557 |
| C | 3.171289 | 0.073863  | -0.892805 |
| H | 2.701746 | -0.576104 | -0.146389 |
| H | 3.131196 | -0.407194 | -1.876811 |
| H | 4.209385 | 0.291041  | -0.613362 |
| C | 3.080135 | 2.291913  | -1.886609 |
| H | 4.073399 | 2.541803  | -1.493335 |
| H | 3.179316 | 1.790585  | -2.856422 |
| H | 2.460589 | 3.189889  | -1.981936 |
| C | 1.022491 | 1.043581  | -1.449720 |
| H | 0.555615 | 0.331883  | -0.757682 |
| H | 0.455825 | 1.978127  | -1.477899 |
| H | 1.100650 | 0.605140  | -2.451872 |

**[TS, Approximation: A, Orientation: Downward]**

|    |           |           |           |
|----|-----------|-----------|-----------|
| C  | -1.659311 | -2.790553 | -1.321450 |
| C  | -1.596769 | -1.402455 | -0.860835 |
| O  | -0.284110 | -2.673931 | -1.202526 |
| H  | -2.155784 | -3.489639 | -0.627386 |
| H  | -1.419738 | -1.240147 | 0.199055  |
| S  | -2.032774 | 1.268516  | 1.028281  |
| C  | -3.492221 | 0.649571  | 0.545913  |
| S  | -3.831336 | -0.671576 | -0.444977 |
| Cl | -4.954478 | 1.474248  | 1.141436  |
| H  | -2.034773 | -2.942973 | -2.349116 |
| C  | -1.131896 | -0.326820 | -1.810703 |
| H  | -1.001254 | -0.770198 | -2.813378 |
| H  | -1.897449 | 0.460486  | -1.867595 |
| O  | 0.082738  | 0.248899  | -1.369968 |
| C  | 0.208303  | 1.589899  | -1.782243 |
| H  | -0.695646 | 2.150506  | -1.485260 |
| H  | 0.304797  | 1.645102  | -2.883218 |
| C  | 1.415098  | 2.203767  | -1.127130 |
| C  | 1.275413  | 2.918137  | 0.068188  |
| C  | 2.691293  | 2.035132  | -1.676431 |
| C  | 2.394760  | 3.461041  | 0.700491  |
| H  | 0.278009  | 3.046433  | 0.497459  |
| C  | 3.811815  | 2.574102  | -1.044668 |
| H  | 2.800607  | 1.481562  | -2.612136 |
| C  | 3.664155  | 3.288336  | 0.146253  |
| H  | 2.274425  | 4.026755  | 1.625869  |
| H  | 4.801588  | 2.446838  | -1.486508 |
| H  | 4.538276  | 3.721477  | 0.635469  |
| H  | 0.517571  | -3.494004 | -0.211449 |
| O  | 1.296182  | -3.827831 | 0.353339  |
| C  | 2.412819  | -3.290332 | -0.265844 |
| H  | 3.317192  | -3.746698 | 0.171137  |
| H  | 2.442927  | -3.506332 | -1.350292 |
| C  | 2.496877  | -1.768062 | -0.157583 |
| H  | 3.479915  | -1.418989 | -0.506515 |
| H  | 1.703937  | -1.285250 | -0.749721 |
| N  | 2.325801  | -1.243890 | 1.261930  |
| C  | 3.004283  | 0.075782  | 1.360830  |
| H  | 2.618816  | 0.720260  | 0.564716  |
| H  | 2.781722  | 0.517420  | 2.339684  |

|   |          |           |          |
|---|----------|-----------|----------|
| H | 4.085126 | -0.067349 | 1.243263 |
| C | 2.900210 | -2.174336 | 2.271847 |
| H | 3.956969 | -2.347833 | 2.034971 |
| H | 2.812172 | -1.702183 | 3.257557 |
| H | 2.333610 | -3.110991 | 2.234072 |
| C | 0.866222 | -1.041159 | 1.541151 |
| H | 0.477825 | -0.297269 | 0.832349 |
| H | 0.368275 | -2.002640 | 1.387999 |
| H | 0.757360 | -0.689767 | 2.574705 |

**[P, Approximation: A, Orientation: Downward]**

|    |           |           |           |
|----|-----------|-----------|-----------|
| C  | -1.197212 | 0.887091  | 1.839845  |
| C  | -1.860426 | 0.019564  | 0.741909  |
| O  | 0.107076  | 1.146494  | 1.551994  |
| H  | -1.815059 | 1.809196  | 1.932866  |
| H  | -1.723263 | 0.508414  | -0.234175 |
| S  | -3.614640 | -0.468337 | -1.944529 |
| C  | -4.345907 | -0.279447 | -0.513060 |
| S  | -3.661221 | 0.000986  | 1.055765  |
| Cl | -6.096455 | -0.322766 | -0.359550 |
| H  | -1.333319 | 0.342380  | 2.807492  |
| C  | -1.384841 | -1.434544 | 0.660078  |
| H  | -1.531892 | -1.915600 | 1.645371  |
| H  | -2.005374 | -1.968006 | -0.075411 |
| O  | -0.050712 | -1.578060 | 0.237948  |
| C  | 0.901458  | -1.694493 | 1.267334  |
| H  | 0.644654  | -2.557615 | 1.914399  |
| H  | 0.917443  | -0.777181 | 1.880188  |
| C  | 2.256429  | -1.935186 | 0.651157  |
| C  | 2.375708  | -2.585822 | -0.582650 |
| C  | 3.419123  | -1.533883 | 1.319189  |
| C  | 3.633460  | -2.836056 | -1.131986 |
| H  | 1.465507  | -2.883575 | -1.104539 |
| C  | 4.677391  | -1.783502 | 0.771090  |
| H  | 3.332675  | -1.016384 | 2.278022  |
| C  | 4.788431  | -2.436335 | -0.457624 |
| H  | 3.712945  | -3.349269 | -2.092063 |
| H  | 5.575007  | -1.467727 | 1.305693  |
| H  | 5.771959  | -2.635592 | -0.886128 |
| H  | 0.360446  | 2.375550  | 1.171257  |
| O  | 0.814572  | 3.311293  | 0.778637  |
| C  | 2.146008  | 3.130317  | 1.048411  |
| H  | 2.737453  | 4.003958  | 0.710630  |
| H  | 2.372111  | 3.016346  | 2.130650  |
| C  | 2.717044  | 1.860053  | 0.409196  |
| H  | 3.811205  | 1.818371  | 0.518260  |
| H  | 2.257332  | 0.975749  | 0.868398  |
| N  | 2.427950  | 1.736586  | -1.080174 |
| C  | 3.412958  | 0.789008  | -1.664894 |
| H  | 3.362326  | -0.154113 | -1.108505 |
| H  | 3.158613  | 0.617240  | -2.717993 |
| H  | 4.417298  | 1.221454  | -1.582979 |
| C  | 2.533354  | 3.060423  | -1.750998 |
| H  | 3.525134  | 3.483963  | -1.550718 |
| H  | 2.398775  | 2.911680  | -2.829185 |
| H  | 1.744502  | 3.701761  | -1.340393 |
| C  | 1.048505  | 1.190523  | -1.311394 |
| H  | 0.956213  | 0.214608  | -0.818461 |
| H  | 0.341374  | 1.885870  | -0.854636 |
| H  | 0.907402  | 1.102994  | -2.396499 |

**[R, Approximation: B, Orientation: Upward]**

|    |           |           |           |
|----|-----------|-----------|-----------|
| C  | -1.451224 | -1.330704 | 0.724046  |
| C  | -0.375202 | -1.681532 | 1.659871  |
| O  | -0.613272 | -0.330790 | 1.285157  |
| H  | 0.555059  | -2.116003 | 1.277268  |
| S  | 3.094220  | -1.062622 | 1.746852  |
| C  | 3.297492  | -1.583343 | 0.175991  |
| Cl | 4.744529  | -0.823345 | -0.694852 |
| S  | 2.414829  | -2.617608 | -0.760634 |
| H  | -2.485386 | -1.300396 | 1.086571  |
| C  | -1.239664 | -1.483108 | -0.760960 |
| H  | -1.873367 | -2.286336 | -1.174061 |
| H  | -0.185119 | -1.738829 | -0.945960 |
| O  | -1.489734 | -0.254181 | -1.424535 |
| C  | -2.779741 | -0.097428 | -1.983251 |
| H  | -2.954805 | -0.884283 | -2.738292 |
| H  | -2.756445 | 0.873809  | -2.496951 |
| C  | -3.882166 | -0.121196 | -0.950119 |
| C  | -4.754334 | -1.207304 | -0.855400 |
| C  | -3.988393 | 0.924311  | -0.023584 |
| C  | -5.715425 | -1.260049 | 0.155749  |
| H  | -4.677466 | -2.024921 | -1.576680 |
| C  | -4.945689 | 0.872865  | 0.985910  |
| H  | -3.299136 | 1.769560  | -0.093893 |
| C  | -5.808781 | -0.221618 | 1.079862  |
| H  | -6.389887 | -2.115011 | 0.222252  |
| H  | -5.022045 | 1.689780  | 1.705262  |
| H  | -6.557061 | -0.261334 | 1.872893  |
| H  | -0.635236 | -1.916064 | 2.696141  |
| C  | 1.661141  | 0.957875  | -1.035708 |
| H  | 0.732019  | 1.129542  | -1.586026 |
| H  | 1.540200  | 0.105882  | -0.357563 |
| N  | 1.974878  | 2.176723  | -0.203809 |
| C  | 1.738638  | 3.404825  | -1.008811 |
| H  | 1.959819  | 4.283092  | -0.389288 |
| H  | 2.415737  | 3.379058  | -1.870881 |
| H  | 0.695386  | 3.410946  | -1.340096 |
| C  | 3.414412  | 2.131636  | 0.203289  |
| H  | 4.031554  | 2.052221  | -0.697947 |
| H  | 3.642013  | 3.052742  | 0.753348  |
| H  | 3.574499  | 1.243516  | 0.832463  |
| C  | 1.144394  | 2.163438  | 1.059547  |
| H  | 2.506933  | 0.764778  | -1.706840 |
| C  | -0.300843 | 2.626068  | 0.880086  |
| H  | 1.646777  | 2.827214  | 1.777881  |
| H  | 1.202497  | 1.133287  | 1.435359  |
| O  | -0.921271 | 2.180154  | -0.286655 |
| H  | -0.836138 | 2.306187  | 1.790531  |
| H  | -0.334223 | 3.726380  | 0.848154  |
| H  | -1.015583 | 1.208783  | -0.294843 |

**[TS, Approximation: B, Orientation: Upward]**

|    |           |           |           |
|----|-----------|-----------|-----------|
| C  | -1.124655 | -1.204930 | 0.367648  |
| C  | -0.080030 | -2.040136 | 0.962117  |
| O  | -0.494426 | -0.082451 | 0.882618  |
| H  | 0.575361  | -2.657881 | 0.342036  |
| S  | 2.239153  | -1.198057 | 1.549079  |
| C  | 3.146101  | -1.650198 | 0.199300  |
| Cl | 4.881052  | -1.156847 | 0.330494  |
| S  | 2.689570  | -2.400163 | -1.188264 |
| H  | -2.138348 | -1.386260 | 0.780652  |
| C  | -1.146708 | -1.215066 | -1.162987 |
| H  | -1.754714 | -2.055651 | -1.548604 |

|   |           |           |           |
|---|-----------|-----------|-----------|
| H | -0.114462 | -1.351747 | -1.526554 |
| O | -1.603559 | 0.015595  | -1.678181 |
| C | -2.971247 | 0.078209  | -2.002518 |
| H | -3.210155 | -0.662374 | -2.789364 |
| H | -3.125615 | 1.082348  | -2.422697 |
| C | -3.890483 | -0.135064 | -0.820272 |
| C | -4.734749 | -1.245308 | -0.759888 |
| C | -3.858106 | 0.759747  | 0.257173  |
| C | -5.535511 | -1.470177 | 0.361311  |
| H | -4.760044 | -1.947800 | -1.596975 |
| C | -4.653756 | 0.534297  | 1.377102  |
| H | -3.186332 | 1.620496  | 0.217203  |
| C | -5.492076 | -0.581791 | 1.433375  |
| H | -6.189258 | -2.343077 | 0.398354  |
| H | -4.619167 | 1.231740  | 2.215689  |
| H | -6.112468 | -0.756523 | 2.313940  |
| H | -0.187645 | -2.313110 | 2.011697  |
| C | 1.403904  | 1.140363  | -1.173506 |
| H | 0.366801  | 1.337365  | -1.461378 |
| H | 1.437383  | 0.226708  | -0.572688 |
| N | 1.909025  | 2.272984  | -0.319323 |
| C | 1.703848  | 3.549835  | -1.048208 |
| H | 2.036961  | 4.383299  | -0.416888 |
| H | 2.294238  | 3.519010  | -1.971813 |
| H | 0.636883  | 3.639416  | -1.281201 |
| C | 3.362350  | 2.050750  | -0.069252 |
| H | 3.872929  | 1.905382  | -1.028350 |
| H | 3.769532  | 2.924516  | 0.453484  |
| H | 3.472906  | 1.150466  | 0.547706  |
| C | 1.224966  | 2.301270  | 1.036028  |
| H | 2.065769  | 1.065559  | -2.045238 |
| C | -0.181945 | 2.885373  | 1.025163  |
| H | 1.875841  | 2.891980  | 1.697097  |
| H | 1.197679  | 1.256875  | 1.373094  |
| O | -0.996531 | 2.315160  | 0.059612  |
| H | -0.563828 | 2.740125  | 2.054075  |
| H | -0.146945 | 3.974749  | 0.854902  |
| H | -0.969207 | 1.321949  | 0.237710  |

**[P, Approximation: B, Orientation: Upward]**

|    |           |           |           |
|----|-----------|-----------|-----------|
| C  | 0.756104  | -0.882649 | -0.611206 |
| C  | -0.182890 | -1.850456 | -1.363057 |
| O  | 0.479942  | 0.389674  | -0.992248 |
| H  | -0.207259 | -2.882598 | -0.985384 |
| S  | -1.883128 | -1.195378 | -1.359381 |
| C  | -2.733092 | -2.146146 | -0.193666 |
| Cl | -4.367543 | -1.464680 | -0.040118 |
| S  | -2.267733 | -3.414710 | 0.690581  |
| H  | 1.781693  | -1.217964 | -0.896754 |
| C  | 0.605803  | -1.092887 | 0.908862  |
| H  | 1.015325  | -2.074519 | 1.218917  |
| H  | -0.466074 | -1.094474 | 1.169227  |
| O  | 1.189947  | -0.049335 | 1.655963  |
| C  | 2.516235  | -0.256447 | 2.070107  |
| H  | 2.581167  | -1.166134 | 2.698018  |
| H  | 2.762190  | 0.607580  | 2.704979  |
| C  | 3.517885  | -0.361739 | 0.940819  |
| C  | 4.304703  | -1.505131 | 0.790826  |
| C  | 3.640286  | 0.682732  | 0.015345  |
| C  | 5.206232  | -1.615072 | -0.269229 |
| H  | 4.204524  | -2.324480 | 1.507552  |

|   |           |           |           |
|---|-----------|-----------|-----------|
| C | 4.535639  | 0.569912  | -1.044688 |
| H | 3.009879  | 1.570270  | 0.112398  |
| C | 5.319338  | -0.577128 | -1.191270 |
| H | 5.813947  | -2.515029 | -0.377776 |
| H | 4.618685  | 1.382632  | -1.768271 |
| H | 6.017666  | -0.660563 | -2.025891 |
| H | 0.086207  | -1.849299 | -2.427333 |
| C | -1.455738 | 1.548617  | 1.154650  |
| H | -0.366418 | 1.538207  | 1.262376  |
| H | -1.781169 | 0.650419  | 0.620844  |
| N | -1.861018 | 2.735022  | 0.328443  |
| C | -1.492947 | 3.972792  | 1.065278  |
| H | -1.737269 | 4.845071  | 0.446471  |
| H | -2.062517 | 4.002083  | 2.002035  |
| H | -0.416040 | 3.924720  | 1.265442  |
| C | -3.331714 | 2.668330  | 0.129029  |
| H | -3.822602 | 2.620646  | 1.108741  |
| H | -3.664726 | 3.557159  | -0.419642 |
| H | -3.558827 | 1.758983  | -0.441434 |
| C | -1.198278 | 2.709331  | -1.042802 |
| H | -1.967076 | 1.634440  | 2.122513  |
| C | 0.256993  | 3.189604  | -1.032066 |
| H | -1.818697 | 3.342702  | -1.694308 |
| H | -1.219817 | 1.659688  | -1.366648 |
| O | 1.016427  | 2.547250  | -0.086221 |
| H | 0.607260  | 3.020342  | -2.072052 |
| H | 0.281940  | 4.285992  | -0.876594 |
| H | 0.919247  | 1.477250  | -0.385270 |

**[R, Approximation: B, Orientation: Downward]**

|    |           |           |           |
|----|-----------|-----------|-----------|
| C  | -0.164521 | -2.748790 | 1.579813  |
| C  | -0.533860 | -3.423004 | 0.330492  |
| O  | 0.738937  | -2.805626 | 0.483210  |
| H  | -1.212078 | -2.908195 | -0.360062 |
| H  | -0.510378 | -4.515895 | 0.296313  |
| S  | -3.601656 | -1.139776 | 0.062441  |
| C  | -2.778557 | -0.242935 | -1.045584 |
| Cl | -3.467882 | 1.406328  | -1.395374 |
| S  | -1.385523 | -0.597476 | -1.912144 |
| H  | 0.144586  | -3.351294 | 2.441825  |
| C  | -0.731128 | -1.401696 | 1.900510  |
| H  | -1.714761 | -1.521794 | 2.390774  |
| H  | -0.905883 | -0.862301 | 0.951998  |
| O  | 0.161420  | -0.720115 | 2.753044  |
| C  | -0.292139 | 0.559494  | 3.140788  |
| H  | 0.227267  | 0.802721  | 4.078263  |
| H  | -1.377092 | 0.525003  | 3.345988  |
| C  | 0.003325  | 1.619992  | 2.103248  |
| C  | 1.173093  | 2.384856  | 2.198747  |
| C  | -0.854268 | 1.824875  | 1.015109  |
| C  | 1.482808  | 3.337565  | 1.228093  |
| H  | 1.840597  | 2.237711  | 3.051706  |
| C  | -0.536863 | 2.759737  | 0.028387  |
| H  | -1.790021 | 1.262921  | 0.936629  |
| C  | 0.628214  | 3.521189  | 0.137700  |
| H  | 2.385086  | 3.944038  | 1.327338  |
| H  | -1.219429 | 2.881565  | -0.814764 |
| H  | 0.862473  | 4.272620  | -0.619525 |
| N  | 2.375433  | 0.027826  | -1.736567 |
| C  | 2.096517  | -1.296126 | -2.377552 |
| H  | 2.652113  | -2.058168 | -1.826088 |
| H  | 2.420924  | -1.245827 | -3.424245 |

|   |          |           |           |
|---|----------|-----------|-----------|
| H | 1.018756 | -1.489878 | -2.312904 |
| C | 1.652188 | 1.094664  | -2.492351 |
| H | 0.570168 | 0.915317  | -2.400924 |
| H | 1.964962 | 1.048233  | -3.542849 |
| H | 1.912487 | 2.064855  | -2.053492 |
| C | 3.837068 | 0.296901  | -1.779442 |
| H | 4.358642 | -0.533783 | -1.291737 |
| H | 4.035782 | 1.240433  | -1.256477 |
| H | 4.142142 | 0.380506  | -2.829484 |
| C | 1.857935 | 0.029167  | -0.307434 |
| C | 2.795177 | -0.607883 | 0.709375  |
| H | 0.885563 | -0.481001 | -0.347722 |
| H | 1.688491 | 1.079393  | -0.037487 |
| O | 3.286728 | -1.868035 | 0.337638  |
| H | 2.218938 | -0.639601 | 1.649876  |
| H | 3.666118 | 0.043361  | 0.882185  |
| H | 2.548757 | -2.495080 | 0.426907  |

**[TS, Approximation: B, Orientation: Downward]**

|    |           |           |           |
|----|-----------|-----------|-----------|
| C  | -0.816975 | -1.692728 | 0.570174  |
| C  | -1.613969 | -1.784547 | -0.643282 |
| O  | 0.149120  | -1.628768 | -0.442871 |
| H  | -1.806431 | -0.871216 | -1.204085 |
| H  | -1.751505 | -2.758206 | -1.109456 |
| S  | -3.961290 | -1.599144 | 0.024421  |
| C  | -4.245640 | 0.014245  | -0.384832 |
| Cl | -5.934422 | 0.518086  | -0.072917 |
| S  | -3.244087 | 1.171574  | -1.016486 |
| H  | -0.753970 | -2.611230 | 1.180541  |
| C  | -0.970101 | -0.450457 | 1.422250  |
| H  | -1.681900 | -0.648013 | 2.242727  |
| H  | -1.388515 | 0.365111  | 0.811659  |
| O  | 0.304829  | -0.108216 | 1.940508  |
| C  | 0.501229  | 1.253061  | 2.204344  |
| H  | 1.182918  | 1.332805  | 3.065667  |
| H  | -0.449533 | 1.730477  | 2.505498  |
| C  | 1.093991  | 2.022946  | 1.035489  |
| C  | 1.989704  | 3.069408  | 1.280663  |
| C  | 0.742011  | 1.736200  | -0.291603 |
| C  | 2.511922  | 3.829624  | 0.232925  |
| H  | 2.279059  | 3.297263  | 2.309854  |
| C  | 1.256743  | 2.502306  | -1.338516 |
| H  | 0.073325  | 0.902956  | -0.517589 |
| C  | 2.140875  | 3.551581  | -1.082470 |
| H  | 3.204955  | 4.645078  | 0.446650  |
| H  | 0.953210  | 2.278403  | -2.363021 |
| H  | 2.534146  | 4.153169  | -1.903423 |
| N  | 3.686699  | -0.862085 | -0.597426 |
| C  | 2.769377  | -0.944962 | -1.782403 |
| H  | 2.427486  | -1.977288 | -1.878019 |
| H  | 3.333674  | -0.620552 | -2.665521 |
| H  | 1.905435  | -0.299073 | -1.595394 |
| C  | 4.241386  | 0.519439  | -0.527255 |
| H  | 3.417394  | 1.217088  | -0.331738 |
| H  | 4.720447  | 0.759262  | -1.484091 |
| H  | 4.975282  | 0.564789  | 0.285768  |
| C  | 4.786763  | -1.847559 | -0.767742 |
| H  | 4.336605  | -2.840154 | -0.883095 |
| H  | 5.433946  | -1.815508 | 0.117390  |
| H  | 5.360551  | -1.578228 | -1.662739 |
| C  | 2.922944  | -1.112655 | 0.690070  |
| C  | 2.629386  | -2.579808 | 0.986579  |



|   |          |           |           |
|---|----------|-----------|-----------|
| H | 1.981165 | -0.557704 | 0.602943  |
| H | 3.525909 | -0.678076 | 1.501250  |
| O | 2.067151 | -3.265243 | -0.080994 |
| H | 1.975025 | -2.551350 | 1.879577  |
| H | 3.552153 | -3.102339 | 1.289510  |
| H | 1.216805 | -2.767939 | -0.305730 |

**[P, Approximation: B, Orientation: Downward]**

|    |           |           |           |
|----|-----------|-----------|-----------|
| C  | -0.982609 | -1.056006 | -0.088419 |
| C  | -2.212915 | -1.261653 | -0.995027 |
| O  | 0.149994  | -1.203008 | -0.838127 |
| H  | -2.289767 | -0.466067 | -1.749746 |
| H  | -2.084851 | -2.224100 | -1.508047 |
| S  | -3.808780 | -1.404989 | -0.139005 |
| C  | -4.502122 | 0.180675  | -0.242241 |
| Cl | -6.067771 | 0.151217  | 0.561044  |
| S  | -3.929267 | 1.527591  | -0.930496 |
| H  | -1.050405 | -1.821399 | 0.724155  |
| C  | -1.031091 | 0.306768  | 0.602398  |
| H  | -1.952792 | 0.428623  | 1.202603  |
| H  | -1.020807 | 1.100483  | -0.165319 |
| O  | 0.103622  | 0.403592  | 1.443603  |
| C  | 0.535435  | 1.698862  | 1.728655  |
| H  | 1.013138  | 1.681335  | 2.721515  |
| H  | -0.323917 | 2.392871  | 1.804441  |
| C  | 1.529361  | 2.245683  | 0.716680  |
| C  | 2.373938  | 3.300919  | 1.079108  |
| C  | 1.612569  | 1.724768  | -0.580809 |
| C  | 3.281718  | 3.836523  | 0.166921  |
| H  | 2.322108  | 3.707311  | 2.092831  |
| C  | 2.515543  | 2.271330  | -1.496616 |
| H  | 0.986423  | 0.869755  | -0.862761 |
| C  | 3.352528  | 3.324703  | -1.129488 |
| H  | 3.934658  | 4.657461  | 0.468153  |
| H  | 2.562395  | 1.866562  | -2.510248 |
| H  | 4.054429  | 3.748676  | -1.849417 |
| N  | 3.660926  | -1.550983 | -0.119219 |
| C  | 3.056287  | -1.465812 | -1.490740 |
| H  | 2.418324  | -2.340677 | -1.632522 |
| H  | 3.880877  | -1.426401 | -2.214176 |
| H  | 2.431248  | -0.569818 | -1.537307 |
| C  | 4.613432  | -0.420709 | 0.046761  |
| H  | 4.047114  | 0.518941  | 0.003033  |
| H  | 5.352040  | -0.453688 | -0.763644 |
| H  | 5.113700  | -0.516139 | 1.017502  |
| C  | 4.370894  | -2.850680 | 0.003742  |
| H  | 3.639397  | -3.643549 | -0.192411 |
| H  | 4.778926  | -2.940249 | 1.018057  |
| H  | 5.182119  | -2.877321 | -0.734223 |
| C  | 2.595369  | -1.418743 | 0.959263  |
| C  | 1.758748  | -2.682303 | 1.163334  |
| H  | 1.937680  | -0.601049 | 0.642231  |
| H  | 3.125707  | -1.141938 | 1.882988  |
| O  | 1.249745  | -3.186385 | -0.007962 |
| H  | 0.983576  | -2.364752 | 1.894183  |
| H  | 2.368594  | -3.447811 | 1.683596  |
| H  | 0.695057  | -2.332032 | -0.467924 |

## Solvated studies

Anionic reaction (without counter cation):

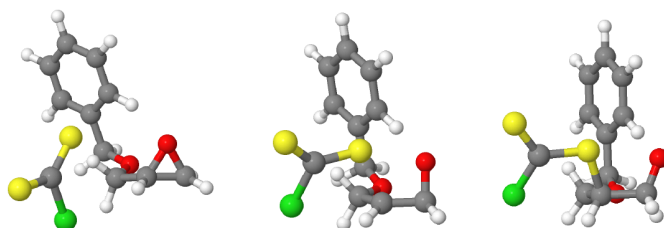

**Figure S23.** Reactant (left), transition state (center) and product (right) of the reaction between  $\text{CS}_2\text{Cl}^-$  and R1i (upward attack to  $\text{C}_A$ ).

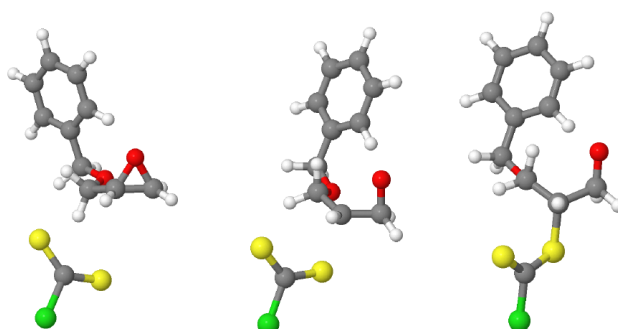

**Figure S24.** Reactant (left), transition state (center) and product (right) of the reaction between  $\text{CS}_2\text{Cl}^-$  and R1i (downward attack to  $\text{C}_A$ ).

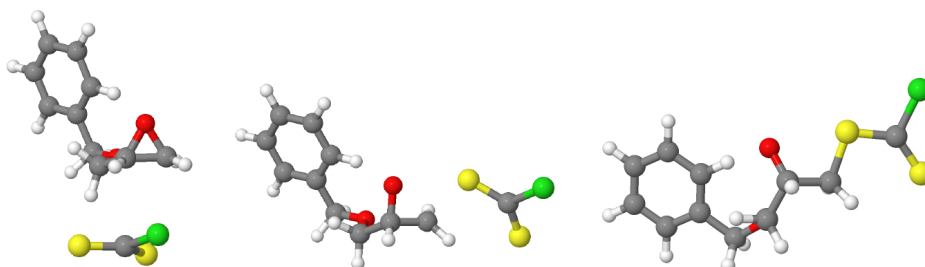

**Figure S25.** Reactant (left), transition state (center) and product (right) of the reaction between  $\text{CS}_2\text{Cl}^-$  and R1i (upward attack to  $\text{C}_B$ ).

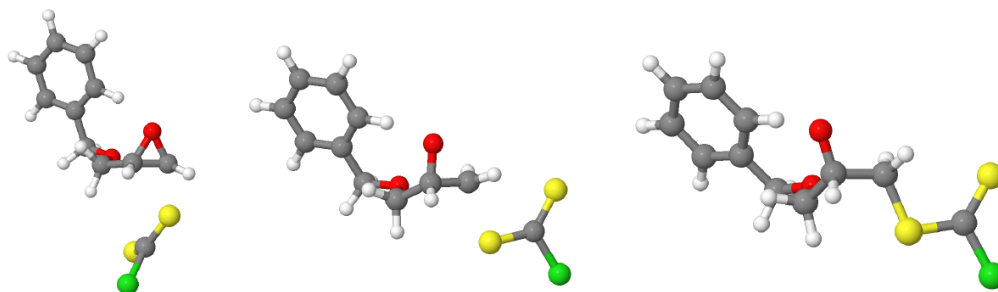

**Figure S26.** Reactant (left), transition state (center) and product (right) of the reaction between  $\text{CS}_2\text{Cl}^-$  and R1i (downward attack to  $\text{C}_B$ ).

| Approximation | Orientation | R   | TS   | P    |
|---------------|-------------|-----|------|------|
| A             | upward      | 0.0 | 58.5 | 25.5 |
| A             | downward    | 0.0 | 32.2 | 18.0 |
| B             | upward      | 0.0 | 55.3 | 14.1 |
| B             | downward    | 0.0 | 26.0 | 13.2 |

**Table S4.** Energies of the reactants (R), transition state (TS) and products (P) involved in the solvated reaction between CS<sub>2</sub>Cl<sup>-</sup> and R1i across various approximations and orientations. All energies are reported, relative to the reactant complex, as the Morokuma-corrected Gibbs free energies (373.15 K).

The upcoming section comprises the optimized geometries of the reactants (R), transition state (TS) and product (P) involved in the reaction across different approximations and orientations. All values are reported as XYZ Cartesian Coordinates in Angstroms.

**[R, Approximation: A, Orientation: Upward]**

|    |           |           |           |
|----|-----------|-----------|-----------|
| C  | 0.279827  | 3.485469  | -1.061148 |
| C  | -0.325798 | 2.271120  | -0.504328 |
| O  | 0.427083  | 2.230916  | -1.696097 |
| H  | -0.348336 | 4.210117  | -1.591027 |
| H  | -1.398504 | 2.087309  | -0.625609 |
| S  | -4.438149 | -1.728833 | 0.038303  |
| C  | -3.021696 | -0.890599 | -0.062991 |
| S  | -1.698357 | -1.020382 | -1.044854 |
| Cl | -2.893813 | 0.513375  | 1.209901  |
| H  | 1.188637  | 3.879499  | -0.596415 |
| C  | 0.270033  | 1.577517  | 0.690766  |
| H  | -0.293606 | 1.867746  | 1.596590  |
| H  | 0.132916  | 0.489934  | 0.556462  |
| O  | 1.628766  | 1.930732  | 0.814212  |
| C  | 2.401468  | 0.995091  | 1.504214  |
| H  | 1.900477  | 0.674882  | 2.438156  |
| H  | 3.328898  | 1.511354  | 1.801318  |
| C  | 2.760455  | -0.226632 | 0.679834  |
| C  | 2.524115  | -0.255942 | -0.697002 |
| C  | 3.361954  | -1.329617 | 1.295428  |
| C  | 2.886719  | -1.377711 | -1.444330 |
| H  | 2.036943  | 0.599097  | -1.172159 |
| C  | 3.733129  | -2.443750 | 0.546138  |
| H  | 3.537426  | -1.315551 | 2.374774  |
| C  | 3.494853  | -2.470578 | -0.829103 |
| H  | 2.683286  | -1.397187 | -2.516574 |
| H  | 4.199891  | -3.299472 | 1.037876  |
| H  | 3.773733  | -3.347071 | -1.416693 |

**[TS, Approximation: A, Orientation: Upward]**

|    |           |           |           |
|----|-----------|-----------|-----------|
| C  | 0.342505  | -2.884105 | -1.243935 |
| C  | 0.756941  | -2.036128 | -0.115471 |
| O  | -0.183467 | -1.836922 | -1.932708 |
| H  | 1.216391  | -3.387079 | -1.721693 |
| H  | 1.784288  | -2.003717 | 0.246439  |
| S  | 3.715868  | 2.063307  | -0.151531 |
| C  | 2.693834  | 0.789884  | 0.000625  |
| S  | 1.635890  | 0.089548  | -1.093492 |
| Cl | 2.682935  | -0.023215 | 1.671813  |
| H  | -0.366560 | -3.691117 | -0.934852 |
| C  | -0.234735 | -1.617234 | 0.918137  |
| H  | 0.125577  | -2.055303 | 1.875486  |
| H  | -0.199082 | -0.522777 | 1.053773  |
| O  | -1.529111 | -2.073593 | 0.643376  |
| C  | -2.543963 | -1.293372 | 1.202940  |
| H  | -2.372561 | -1.128588 | 2.285603  |

|   |           |           |           |
|---|-----------|-----------|-----------|
| H | -3.468915 | -1.885415 | 1.114327  |
| C | -2.732886 | 0.041448  | 0.509116  |
| C | -2.154056 | 0.268785  | -0.743954 |
| C | -3.501448 | 1.042965  | 1.112254  |
| C | -2.350111 | 1.498288  | -1.377578 |
| H | -1.535294 | -0.515354 | -1.205423 |
| C | -3.704426 | 2.261613  | 0.467637  |
| H | -3.942284 | 0.867837  | 2.097997  |
| C | -3.125209 | 2.492568  | -0.781800 |
| H | -1.880158 | 1.677806  | -2.346731 |
| H | -4.305799 | 3.037714  | 0.945511  |
| H | -3.271665 | 3.450824  | -1.284070 |

**[P, Approximation: A, Orientation: Upward]**

|    |           |           |           |
|----|-----------|-----------|-----------|
| C  | 0.549197  | 2.442832  | 1.376824  |
| C  | 1.081339  | 1.619878  | 0.155001  |
| O  | -0.188349 | 1.692557  | 2.178981  |
| H  | 1.495333  | 2.864816  | 1.843282  |
| H  | 2.010729  | 2.038069  | -0.255726 |
| S  | 3.340114  | -2.168061 | 0.339060  |
| C  | 2.574629  | -0.785579 | -0.066444 |
| S  | 1.527047  | 0.053961  | 1.014494  |
| Cl | 2.791059  | -0.124006 | -1.705044 |
| H  | 0.057182  | 3.346104  | 0.913884  |
| C  | 0.062760  | 1.387070  | -0.978363 |
| H  | 0.485964  | 1.760734  | -1.930515 |
| H  | -0.114964 | 0.306307  | -1.116250 |
| O  | -1.152699 | 2.050848  | -0.727962 |
| C  | -2.269257 | 1.427500  | -1.284072 |
| H  | -2.125257 | 1.226514  | -2.365435 |
| H  | -3.096074 | 2.151929  | -1.203312 |
| C  | -2.658746 | 0.143901  | -0.575373 |
| C  | -2.198936 | -0.101772 | 0.724257  |
| C  | -3.492321 | -0.784170 | -1.208533 |
| C  | -2.584894 | -1.279267 | 1.369925  |
| H  | -1.526260 | 0.620810  | 1.228715  |
| C  | -3.883015 | -1.949427 | -0.550088 |
| H  | -3.837811 | -0.593577 | -2.229000 |
| C  | -3.426147 | -2.200218 | 0.744786  |
| H  | -2.214634 | -1.475978 | 2.378529  |
| H  | -4.535391 | -2.667278 | -1.051757 |
| H  | -3.720661 | -3.116471 | 1.260805  |

**[R, Approximation: A, Orientation: Downward]**

|    |           |           |           |
|----|-----------|-----------|-----------|
| C  | 0.131523  | 2.906402  | 0.150313  |
| C  | 0.275536  | 1.512337  | 0.565698  |
| O  | -0.687802 | 2.359281  | 1.170061  |
| H  | 0.871869  | 3.641775  | 0.483237  |
| S  | 3.358004  | 0.758056  | -0.946753 |
| C  | 3.592631  | -0.511220 | 0.094232  |
| Cl | 5.315537  | -1.199699 | 0.068345  |
| S  | 2.578754  | -1.285813 | 1.156673  |
| H  | -0.381948 | 3.124231  | -0.790293 |
| H  | 1.122903  | 1.224870  | 1.197480  |
| C  | -0.256014 | 0.381754  | -0.268619 |
| H  | 0.595056  | -0.098314 | -0.782022 |
| H  | -0.714515 | -0.368380 | 0.402499  |
| O  | -1.200670 | 0.875675  | -1.192900 |
| C  | -2.076736 | -0.090626 | -1.685045 |
| H  | -2.501389 | 0.311441  | -2.619472 |
| H  | -1.539460 | -1.020406 | -1.952911 |
| C  | -3.212212 | -0.414213 | -0.732044 |

|   |           |           |           |
|---|-----------|-----------|-----------|
| C | -4.045113 | -1.511532 | -0.976287 |
| C | -3.460450 | 0.398885  | 0.377480  |
| C | -5.117921 | -1.788702 | -0.131416 |
| H | -3.848156 | -2.156410 | -1.837150 |
| C | -4.530931 | 0.115311  | 1.227386  |
| H | -2.791514 | 1.240240  | 0.576260  |
| C | -5.364433 | -0.973508 | 0.974817  |
| H | -5.760453 | -2.648227 | -0.332156 |
| H | -4.711615 | 0.751440  | 2.096058  |
| H | -6.200537 | -1.192230 | 1.641508  |

**[TS, Approximation: A, Orientation: Downward]**

|    |           |           |           |
|----|-----------|-----------|-----------|
| C  | 0.181905  | 2.318240  | -0.546582 |
| C  | 0.706867  | 1.136132  | 0.161934  |
| O  | -0.723664 | 2.459438  | 0.451811  |
| H  | 0.945525  | 3.125053  | -0.653671 |
| S  | 2.547581  | 0.411785  | -0.993685 |
| C  | 3.485892  | -0.298064 | 0.211685  |
| Cl | 5.152257  | -0.707819 | -0.365580 |
| S  | 3.127447  | -0.661177 | 1.774548  |
| H  | -0.209566 | 2.080850  | -1.561303 |
| H  | 1.276470  | 1.341944  | 1.069784  |
| C  | -0.118427 | -0.120857 | 0.209596  |
| H  | 0.535321  | -0.982473 | 0.434570  |
| H  | -0.843368 | -0.023504 | 1.034744  |
| O  | -0.775700 | -0.296905 | -1.019844 |
| C  | -1.784995 | -1.256090 | -0.996660 |
| H  | -1.968356 | -1.547406 | -2.043739 |
| H  | -1.451924 | -2.171294 | -0.467640 |
| C  | -3.092245 | -0.773946 | -0.392909 |
| C  | -4.159093 | -1.673112 | -0.274292 |
| C  | -3.262781 | 0.553099  | 0.015267  |
| C  | -5.386378 | -1.258187 | 0.237121  |
| H  | -4.024690 | -2.711871 | -0.590215 |
| C  | -4.494245 | 0.960913  | 0.536019  |
| H  | -2.424649 | 1.262766  | -0.028273 |
| C  | -5.557590 | 0.066342  | 0.644774  |
| H  | -6.210478 | -1.969543 | 0.321526  |
| H  | -4.615628 | 1.995694  | 0.863180  |
| H  | -6.516024 | 0.395913  | 1.050641  |

**[P, Approximation: A, Orientation: Downward]**

|    |           |           |           |
|----|-----------|-----------|-----------|
| C  | 0.172438  | 2.231697  | -0.419243 |
| C  | 0.927250  | 1.019301  | 0.250842  |
| O  | -0.901624 | 2.551431  | 0.266675  |
| H  | 0.974571  | 3.032072  | -0.511857 |
| S  | 2.271753  | 0.481117  | -0.858231 |
| C  | 3.437252  | -0.243028 | 0.175913  |
| Cl | 4.828789  | -0.766287 | -0.798460 |
| S  | 3.425970  | -0.480955 | 1.782894  |
| H  | 0.010358  | 1.902313  | -1.495602 |
| H  | 1.391641  | 1.350366  | 1.190434  |
| C  | -0.041846 | -0.102177 | 0.545640  |
| H  | 0.447137  | -0.942900 | 1.075441  |
| H  | -0.812233 | 0.346981  | 1.196167  |
| O  | -0.597764 | -0.550563 | -0.667718 |
| C  | -1.634809 | -1.467959 | -0.529652 |
| H  | -1.705645 | -2.012600 | -1.485895 |
| H  | -1.391540 | -2.223622 | 0.245065  |
| C  | -2.990989 | -0.857635 | -0.222700 |
| C  | -4.092472 | -1.713018 | -0.089579 |
| C  | -3.170276 | 0.525110  | -0.103035 |

|   |           |           |           |
|---|-----------|-----------|-----------|
| C | -5.365681 | -1.204595 | 0.154936  |
| H | -3.948427 | -2.793837 | -0.183962 |
| C | -4.452146 | 1.025360  | 0.150159  |
| H | -2.318377 | 1.231052  | -0.152237 |
| C | -5.549066 | 0.174580  | 0.275620  |
| H | -6.215360 | -1.883597 | 0.253274  |
| H | -4.583983 | 2.104803  | 0.252748  |
| H | -6.543947 | 0.580487  | 0.470593  |

**[R, Approximation: B Orientation: Upward]**

|    |           |           |           |
|----|-----------|-----------|-----------|
| C  | 0.627320  | 1.055858  | 0.227102  |
| C  | 0.951136  | 1.833724  | -0.963724 |
| O  | -0.067968 | 2.254915  | -0.066287 |
| H  | 0.596476  | 1.472984  | -1.932696 |
| H  | 1.864396  | 2.437089  | -0.965035 |
| S  | 3.062950  | -1.046399 | -1.363307 |
| C  | 3.384765  | -0.600886 | 0.196679  |
| S  | 3.061559  | -1.331080 | 1.651574  |
| Cl | 4.264163  | 1.037657  | 0.358130  |
| H  | 1.310246  | 1.107148  | 1.082798  |
| C  | -0.155630 | -0.224414 | 0.140085  |
| H  | 0.549176  | -1.073245 | 0.205844  |
| H  | -0.845156 | -0.280445 | 1.004346  |
| O  | -0.873166 | -0.257051 | -1.070921 |
| C  | -1.953655 | -1.137228 | -1.071649 |
| H  | -2.201153 | -1.335812 | -2.127157 |
| H  | -1.680100 | -2.110167 | -0.620405 |
| C  | -3.180805 | -0.576976 | -0.376628 |
| C  | -4.268872 | -1.407510 | -0.087704 |
| C  | -3.250933 | 0.780571  | -0.049969 |
| C  | -5.416075 | -0.890089 | 0.510582  |
| H  | -4.214192 | -2.471622 | -0.333537 |
| C  | -4.397911 | 1.295843  | 0.556183  |
| H  | -2.388142 | 1.418883  | -0.258736 |
| C  | -5.483750 | 0.466314  | 0.833978  |
| H  | -6.258876 | -1.548274 | 0.730665  |
| H  | -4.440701 | 2.355792  | 0.814286  |
| H  | -6.379359 | 0.873006  | 1.307189  |

**[TS, Approximation: B Orientation: Upward]**

|    |           |           |           |
|----|-----------|-----------|-----------|
| C  | -0.007202 | -0.715542 | -1.319779 |
| C  | -1.040214 | -0.917559 | -0.305053 |
| O  | 0.079322  | 0.588415  | -0.920549 |
| H  | -0.669780 | -1.003997 | 0.716660  |
| H  | -2.006073 | -1.395499 | -0.497153 |
| S  | -2.529660 | 0.961750  | -0.002385 |
| C  | -3.996922 | 0.210688  | 0.289969  |
| S  | -4.307574 | -1.332410 | 0.784346  |
| Cl | -5.448050 | 1.267225  | -0.046198 |
| H  | -0.379299 | -0.869773 | -2.360877 |
| C  | 1.276712  | -1.527229 | -1.181950 |
| H  | 1.157895  | -2.543077 | -1.610380 |
| H  | 2.053803  | -0.996237 | -1.764545 |
| O  | 1.642367  | -1.620384 | 0.174894  |
| C  | 3.007336  | -1.761437 | 0.412731  |
| H  | 3.111462  | -2.161860 | 1.434632  |
| H  | 3.459172  | -2.510617 | -0.267933 |
| C  | 3.780544  | -0.458778 | 0.320774  |
| C  | 5.176406  | -0.471275 | 0.423105  |
| C  | 3.110513  | 0.759341  | 0.170031  |
| C  | 5.900479  | 0.718374  | 0.385340  |
| H  | 5.700740  | -1.424643 | 0.537150  |

|   |          |          |           |
|---|----------|----------|-----------|
| C | 3.842429 | 1.948526 | 0.124571  |
| H | 2.019741 | 0.765266 | 0.050931  |
| C | 5.232044 | 1.935270 | 0.235857  |
| H | 6.988987 | 0.696963 | 0.468913  |
| H | 3.313674 | 2.895270 | -0.003021 |
| H | 5.796005 | 2.869415 | 0.201293  |

**[P, Approximation: B Orientation: Upward]**

|    |           |           |           |
|----|-----------|-----------|-----------|
| C  | -0.122139 | 0.148356  | 1.348905  |
| C  | -1.335471 | 0.691201  | 0.537975  |
| O  | 0.214402  | -1.063776 | 0.938078  |
| H  | -1.010679 | 1.003916  | -0.464754 |
| H  | -1.912394 | 1.499405  | 1.011778  |
| S  | -2.399952 | -0.763313 | 0.341555  |
| C  | -3.852835 | -0.069788 | -0.257564 |
| S  | -4.223297 | 1.461290  | -0.670142 |
| Cl | -5.068072 | -1.360143 | -0.446606 |
| H  | -0.449507 | 0.220960  | 2.439221  |
| C  | 1.000078  | 1.206493  | 1.257782  |
| H  | 0.705375  | 2.163575  | 1.738338  |
| H  | 1.869131  | 0.799831  | 1.805611  |
| O  | 1.335271  | 1.445754  | -0.094776 |
| C  | 2.667737  | 1.761318  | -0.331989 |
| H  | 2.712980  | 2.237038  | -1.326127 |
| H  | 3.039446  | 2.514451  | 0.393163  |
| C  | 3.595409  | 0.558967  | -0.329526 |
| C  | 4.969235  | 0.748199  | -0.521478 |
| C  | 3.088669  | -0.735025 | -0.165586 |
| C  | 5.837454  | -0.340726 | -0.559324 |
| H  | 5.361885  | 1.761952  | -0.646829 |
| C  | 3.968429  | -1.821077 | -0.196784 |
| H  | 2.012053  | -0.885160 | 0.029015  |
| C  | 5.335666  | -1.633840 | -0.396526 |
| H  | 6.906897  | -0.181570 | -0.713151 |
| H  | 3.571356  | -2.828991 | -0.056884 |
| H  | 6.011883  | -2.490902 | -0.421430 |

**[R, Approximation: B Orientation: Downward]**

|    |           |           |           |
|----|-----------|-----------|-----------|
| C  | 0.275809  | 0.675603  | -0.270476 |
| C  | 0.476218  | 1.265796  | -1.588537 |
| O  | -0.394753 | 1.868033  | -0.638565 |
| H  | -0.021983 | 0.815211  | -2.451485 |
| H  | 1.415212  | 1.798009  | -1.769769 |
| S  | 3.109910  | -1.225574 | -0.662903 |
| C  | 3.981711  | -0.089030 | 0.172223  |
| Cl | 5.404168  | -0.789650 | 1.144166  |
| S  | 3.831545  | 1.558279  | 0.303667  |
| H  | 1.084776  | 0.800251  | 0.458555  |
| C  | -0.586166 | -0.537938 | -0.064325 |
| H  | 0.071316  | -1.417465 | 0.061273  |
| H  | -1.165800 | -0.412069 | 0.869628  |
| O  | -1.446138 | -0.709418 | -1.164428 |
| C  | -2.588967 | -1.462296 | -0.895427 |
| H  | -2.990123 | -1.783170 | -1.870443 |
| H  | -2.340403 | -2.383798 | -0.334372 |
| C  | -3.662351 | -0.687580 | -0.154047 |
| C  | -4.757210 | -1.359287 | 0.400009  |
| C  | -3.588231 | 0.704407  | -0.047953 |
| C  | -5.770855 | -0.651879 | 1.043309  |
| H  | -4.814900 | -2.448788 | 0.326371  |
| C  | -4.600443 | 1.410530  | 0.604349  |

|   |           |           |           |
|---|-----------|-----------|-----------|
| H | -2.718492 | 1.222097  | -0.461242 |
| C | -5.694873 | 0.738080  | 1.146784  |
| H | -6.620828 | -1.187206 | 1.470914  |
| H | -4.529327 | 2.496527  | 0.689989  |
| H | -6.484300 | 1.293814  | 1.656027  |

**[TS, Approximation: B Orientation: Downward]**

|    |           |           |           |
|----|-----------|-----------|-----------|
| C  | -0.045282 | -0.759873 | -1.510824 |
| C  | 1.061880  | -0.978462 | -0.563594 |
| O  | -0.613888 | -1.865593 | -0.976623 |
| H  | 0.839706  | -0.752120 | 0.478044  |
| H  | 1.717305  | -1.826319 | -0.754735 |
| S  | 2.703444  | 0.571953  | -0.787589 |
| C  | 3.859845  | -0.014474 | 0.290576  |
| Cl | 5.357349  | 1.006900  | 0.315554  |
| S  | 3.825429  | -1.322485 | 1.278585  |
| H  | 0.266240  | -0.825949 | -2.582848 |
| C  | -0.816849 | 0.545373  | -1.347860 |
| H  | -0.278816 | 1.385832  | -1.831892 |
| H  | -1.789508 | 0.424549  | -1.861500 |
| O  | -1.003918 | 0.822650  | 0.019685  |
| C  | -2.141532 | 1.564204  | 0.323325  |
| H  | -1.982301 | 1.996029  | 1.325140  |
| H  | -2.264450 | 2.418430  | -0.372366 |
| C  | -3.416048 | 0.740205  | 0.346599  |
| C  | -4.650699 | 1.374514  | 0.526223  |
| C  | -3.366921 | -0.652291 | 0.225376  |
| C  | -5.826503 | 0.630512  | 0.596225  |
| H  | -4.689449 | 2.464077  | 0.615994  |
| C  | -4.550277 | -1.392400 | 0.288417  |
| H  | -2.401585 | -1.144265 | 0.048029  |
| C  | -5.778300 | -0.759993 | 0.478124  |
| H  | -6.783711 | 1.135890  | 0.740085  |
| H  | -4.506116 | -2.478701 | 0.186198  |
| H  | -6.697649 | -1.346597 | 0.529483  |

**[P, Approximation: B Orientation: Downward]**

|    |           |           |           |
|----|-----------|-----------|-----------|
| C  | 0.018697  | 1.075005  | 1.192713  |
| C  | 1.283007  | 1.011839  | 0.269249  |
| O  | -0.759968 | 2.053640  | 0.789708  |
| H  | 0.964728  | 0.749932  | -0.748849 |
| H  | 1.762439  | 1.999282  | 0.264814  |
| S  | 2.513167  | -0.213732 | 0.819045  |
| C  | 3.815702  | -0.026349 | -0.285499 |
| Cl | 5.109944  | -1.172505 | 0.129925  |
| S  | 3.971083  | 0.985580  | -1.542814 |
| H  | 0.435143  | 1.165327  | 2.254634  |
| C  | -0.654310 | -0.318695 | 1.204273  |
| H  | -0.036602 | -1.089640 | 1.714971  |
| H  | -1.596289 | -0.209768 | 1.771472  |
| O  | -0.914447 | -0.734252 | -0.121658 |
| C  | -2.034220 | -1.541133 | -0.280628 |
| H  | -1.927051 | -2.054509 | -1.251091 |
| H  | -2.072197 | -2.336427 | 0.492270  |
| C  | -3.346015 | -0.776008 | -0.281670 |
| C  | -4.552123 | -1.474814 | -0.411152 |
| C  | -3.359455 | 0.619945  | -0.184365 |
| C  | -5.766660 | -0.793516 | -0.453300 |
| H  | -4.537735 | -2.566678 | -0.483018 |
| C  | -4.583161 | 1.294970  | -0.220893 |
| H  | -2.414086 | 1.170629  | -0.035839 |
| C  | -5.783941 | 0.599754  | -0.359909 |



|   |           |           |           |
|---|-----------|-----------|-----------|
| H | -6.701149 | -1.348961 | -0.557919 |
| H | -4.590916 | 2.383955  | -0.136516 |
| H | -6.733147 | 1.138779  | -0.390654 |

Neutral reaction (using  $\text{N}(\text{CH}_3)_4^+$  as a counter cation):

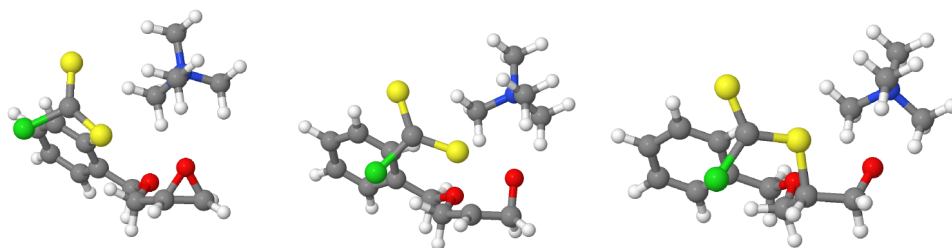

**Figure S27.** Reactant (left), transition state (center) and product (right) of the reaction between  $\text{CS}_2\text{Cl}^-$  +  $\text{N}(\text{CH}_3)_4^+$  and R1i (upward attack to  $\text{C}_A$ ).

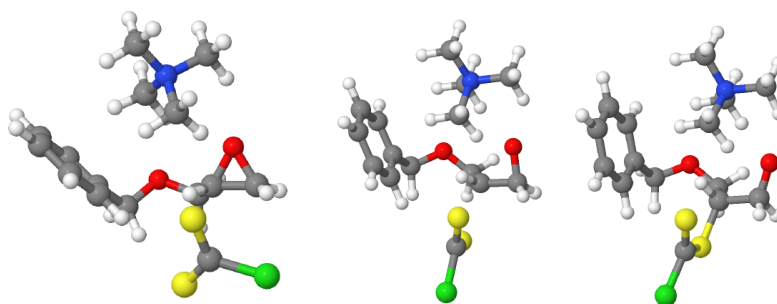

**Figure S28.** Reactant (left), transition state (center) and product (right) of the reaction between  $\text{CS}_2\text{Cl}^-$  +  $\text{N}(\text{CH}_3)_4^+$  and R1i (downward attack to  $\text{C}_A$ ).

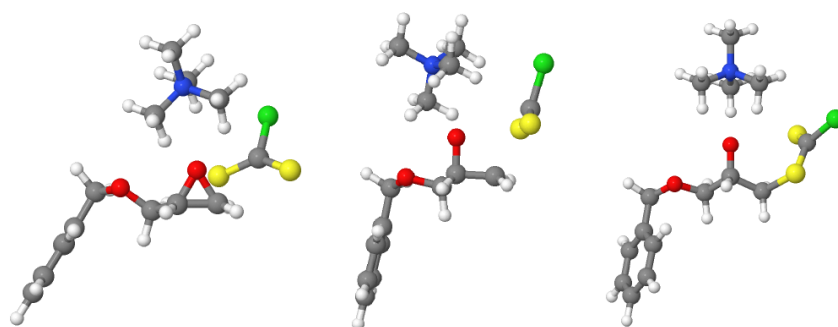

**Figure S29.** Reactant (left), transition state (center) and product (right) of the reaction between  $\text{CS}_2\text{Cl}^-$  +  $\text{N}(\text{CH}_3)_4^+$  and R1i (upward attack to  $\text{C}_B$ ).

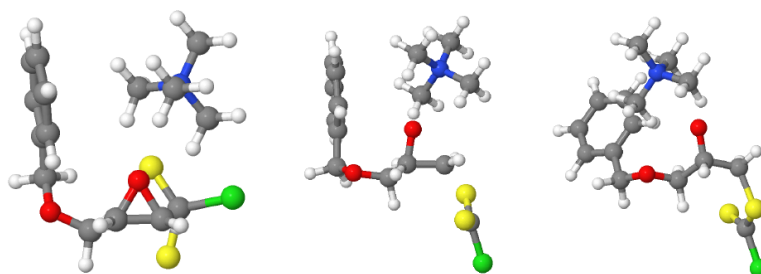

**Figure S30.** Reactant (left), transition state (center) and product (right) of the reaction between  $\text{CS}_2\text{Cl}^-$  +  $\text{N}(\text{CH}_3)_4^+$  and R1i (downward attack to  $\text{C}_B$ ).

| Approximation | Orientation | R   | TS   | P    |
|---------------|-------------|-----|------|------|
| A             | upward      | 0.0 | 54.8 | 12.1 |
| A             | downward    | 0.0 | 28.0 | 11.2 |
| B             | upward      | 0.0 | 58.5 | 9.1  |
| B             | downward    | 0.0 | 26.2 | 4.6  |

**Table S5.** Energies of the reactants (R), transition state (TS) and products (P) involved in the solvated reaction between  $\text{CS}_2\text{Cl}^- + \text{N}(\text{CH}_3)_4^+$  and R1i across various approximations and orientations. All energies are reported, relative to the reactant complex, as the Morokuma-corrected Gibbs free energies (373.15 K).

| Atom         | R     | TS    | P     |
|--------------|-------|-------|-------|
| $\text{C}_A$ | +0.49 | +0.05 | -0.02 |
| $\text{C}_B$ | +0.47 | +0.79 | +0.91 |
| $\text{S}'$  | +0.14 | +0.29 | +0.43 |
| O            | -1.02 | -1.10 | -1.32 |

**Table S6.** Atomic charges (in electrons) for the most relevant atoms involved in the reaction between  $\text{CS}_2\text{Cl}^- + \text{N}(\text{CH}_3)_4^+$  and R1i (upward attack to  $\text{C}_A$ ). The results for the reactants (R), transition state (TS) and product (P) are shown.

| Atom         | R     | TS    | P     |
|--------------|-------|-------|-------|
| $\text{C}_A$ | +0.40 | +0.03 | -0.06 |
| $\text{C}_B$ | +0.47 | +0.74 | +0.92 |
| $\text{S}'$  | +0.17 | +0.22 | +0.35 |
| O            | -1.05 | -1.12 | -1.30 |

**Table S7.** Atomic charges (in electrons) for the most relevant atoms involved in the reaction between  $\text{CS}_2\text{Cl}^- + \text{N}(\text{CH}_3)_4^+$  and R1i (downward attack to  $\text{C}_A$ ). The results for the reactants (R), transition state (TS) and product (P) are shown.

| Atom         | R     | TS    | P     |
|--------------|-------|-------|-------|
| $\text{C}_A$ | +0.47 | +0.78 | +0.90 |
| $\text{C}_B$ | +0.47 | +0.07 | -0.03 |
| $\text{S}'$  | +0.24 | +0.40 | +0.43 |
| O            | -1.03 | -1.09 | -1.32 |

**Table S8.** Atomic charges (in electrons) for the most relevant atoms involved in the reaction between  $\text{CS}_2\text{Cl}^- + \text{N}(\text{CH}_3)_4^+$  and R1i (upward attack to  $\text{C}_B$ ). The results for the reactants (R), transition state (TS) and product (P) are shown.

| Atom         | R     | TS    | P     |
|--------------|-------|-------|-------|
| $\text{C}_A$ | +0.45 | +0.71 | +0.87 |
| $\text{C}_B$ | +0.44 | +0.07 | -0.02 |
| $\text{S}'$  | +0.23 | +0.25 | +0.35 |
| O            | -1.05 | -1.11 | -1.31 |

**Table S9.** Atomic charges (in electrons) for the most relevant atoms involved in the reaction between  $\text{CS}_2\text{Cl}^- + \text{N}(\text{CH}_3)_4^+$  and R1i (downward attack to  $\text{C}_B$ ). The results for the reactants (R), transition state (TS) and product (P) are shown.

| Atomic Pair                | R    | TS   | P    |
|----------------------------|------|------|------|
| O- $\text{C}_A$            | 0.90 | 0.39 | 0.12 |
| O- $\text{C}_B$            | 0.93 | 0.95 | 0.98 |
| $\text{C}_A$ - $\text{S}'$ | 0.02 | 0.39 | 0.96 |

**Table S10.** Delocalization Index (DI, in electron pairs) for the most relevant atomic pairs involved in the reaction between  $\text{CS}_2\text{Cl}^- + \text{N}(\text{CH}_3)_4^+$  and R1i (upward attack to  $\text{C}_A$ ). The results for the reactants (R), transition state (TS) and product (P) are shown.

| Atomic Pair        | R    | TS   | P    |
|--------------------|------|------|------|
| O-C <sub>A</sub>   | 0.89 | 0.46 | 0.13 |
| O-C <sub>B</sub>   | 0.91 | 0.94 | 1.00 |
| C <sub>A</sub> -S' | 0.03 | 0.49 | 0.98 |

**Table S11.** Delocalization Index (DI, in electron pairs) for the most relevant atomic pairs involved in the reaction between CS<sub>2</sub>Cl<sup>-</sup> + N(CH<sub>3</sub>)<sub>4</sub><sup>+</sup> and R1i (downward attack to C<sub>A</sub>). The results for the reactants (R), transition state (TS) and product (P) are shown.

| Atomic Pair        | R    | TS   | P    |
|--------------------|------|------|------|
| O-C <sub>A</sub>   | 0.91 | 0.96 | 0.97 |
| O-C <sub>B</sub>   | 0.92 | 0.41 | 0.12 |
| C <sub>B</sub> -S' | 0.02 | 0.52 | 1.01 |

**Table S12.** Delocalization Index (DI, in electron pairs) for the most relevant atomic pairs involved in the reaction between CS<sub>2</sub>Cl<sup>-</sup> + N(CH<sub>3</sub>)<sub>4</sub><sup>+</sup> and R1i (upward attack to C<sub>B</sub>). The results for the reactants (R), transition state (TS) and product (P) are shown.

| Atomic Pair        | R    | TS   | P    |
|--------------------|------|------|------|
| O-C <sub>A</sub>   | 0.89 | 0.92 | 0.96 |
| O-C <sub>B</sub>   | 0.92 | 0.50 | 0.13 |
| C <sub>B</sub> -S' | 0.01 | 0.52 | 1.01 |

**Table S13.** Delocalization Index (DI, in electron pairs) for the most relevant atomic pairs involved in the reaction between CS<sub>2</sub>Cl<sup>-</sup> + N(CH<sub>3</sub>)<sub>4</sub><sup>+</sup> and R1i (downward attack to C<sub>B</sub>). The results for the reactants (R), transition state (TS) and product (P) are shown.

The upcoming section comprises the optimized geometries of the reactants (R), transition state (TS) and product (P) involved in the reaction across different approximations and orientations. All values are reported as XYZ Cartesian Coordinates in Angstroms.

**[R, Approximation: A Orientation: Upward]**

|    |           |           |           |
|----|-----------|-----------|-----------|
| C  | -2.296475 | -3.060882 | -1.628479 |
| C  | -1.305132 | -2.109745 | -2.140400 |
| O  | -2.303048 | -1.699922 | -1.228375 |
| H  | -3.133953 | -3.366868 | -2.263364 |
| H  | -1.427271 | -1.715441 | -3.155702 |
| S  | -0.089962 | 3.184243  | 0.375716  |
| C  | 0.191420  | 2.341017  | -1.040424 |
| S  | -0.785109 | 1.308383  | -1.897508 |
| Cl | 1.837574  | 2.614433  | -1.764708 |
| H  | -1.988726 | -3.766196 | -0.850668 |
| C  | 0.122478  | -2.129825 | -1.653732 |
| H  | 0.685233  | -2.856289 | -2.271143 |
| H  | 0.575616  | -1.135180 | -1.806107 |
| O  | 0.135259  | -2.512144 | -0.302692 |
| C  | 1.381019  | -2.904373 | 0.205076  |
| H  | 1.898809  | -3.564839 | -0.516467 |
| H  | 1.171087  | -3.513398 | 1.098709  |
| C  | 2.301033  | -1.766409 | 0.600185  |
| C  | 1.911911  | -0.428361 | 0.514766  |
| C  | 3.570137  | -2.073701 | 1.106990  |
| C  | 2.771213  | 0.588942  | 0.940509  |
| H  | 0.936584  | -0.170226 | 0.096988  |
| C  | 4.428004  | -1.062430 | 1.529989  |
| H  | 3.885148  | -3.118825 | 1.174164  |
| C  | 4.028065  | 0.273809  | 1.450911  |
| H  | 2.444772  | 1.627882  | 0.857902  |
| H  | 5.414011  | -1.316271 | 1.923711  |
| H  | 4.699644  | 1.067853  | 1.781347  |

|   |           |           |           |
|---|-----------|-----------|-----------|
| C | -1.323816 | -0.100584 | 1.419971  |
| H | -0.757160 | 0.806313  | 1.170945  |
| H | -0.936283 | -0.556828 | 2.339923  |
| N | -2.742992 | 0.305114  | 1.662336  |
| C | -3.282176 | 0.971047  | 0.439101  |
| H | -4.324059 | 1.253075  | 0.634798  |
| H | -2.658004 | 1.847662  | 0.225757  |
| H | -3.204972 | 0.264036  | -0.394263 |
| C | -3.550785 | -0.903753 | 1.962442  |
| H | -3.484534 | -1.576376 | 1.098835  |
| H | -3.141900 | -1.391268 | 2.855315  |
| H | -4.591225 | -0.604579 | 2.136258  |
| C | -2.790071 | 1.260947  | 2.799388  |
| H | -2.170989 | 2.127637  | 2.536274  |
| H | -3.829418 | 1.569586  | 2.962136  |
| H | -2.394853 | 0.767284  | 3.694878  |
| H | -1.302869 | -0.819584 | 0.592913  |

**[TS, Approximation: A Orientation: Upward]**

|    |           |           |           |
|----|-----------|-----------|-----------|
| C  | 1.899177  | -0.721856 | 2.958826  |
| C  | 0.672678  | 0.051388  | 2.709355  |
| O  | 2.376658  | -0.554183 | 1.684154  |
| H  | 2.526804  | -0.280630 | 3.761909  |
| H  | 0.464439  | 0.982145  | 3.238281  |
| S  | -0.246373 | 2.736479  | -1.591675 |
| C  | -0.176542 | 2.365696  | 0.019269  |
| S  | 1.145422  | 1.801066  | 0.878012  |
| Cl | -1.698045 | 2.569302  | 0.976844  |
| H  | 1.670374  | -1.771879 | 3.253899  |
| C  | -0.541642 | -0.616129 | 2.179668  |
| H  | -1.047459 | -0.989930 | 3.103634  |
| H  | -1.229571 | 0.111840  | 1.721954  |
| O  | -0.243981 | -1.680168 | 1.327282  |
| C  | -1.357590 | -2.446814 | 0.954185  |
| H  | -1.904919 | -2.799663 | 1.849315  |
| H  | -0.952391 | -3.340271 | 0.453535  |
| C  | -2.321282 | -1.737955 | 0.023159  |
| C  | -1.943387 | -0.585451 | -0.670059 |
| C  | -3.609599 | -2.250903 | -0.163425 |
| C  | -2.841589 | 0.055604  | -1.524057 |
| H  | -0.945566 | -0.167239 | -0.516326 |
| C  | -4.500591 | -1.626043 | -1.033452 |
| H  | -3.918302 | -3.146776 | 0.381994  |
| C  | -4.119830 | -0.466906 | -1.712436 |
| H  | -2.531797 | 0.977530  | -2.021011 |
| H  | -5.502503 | -2.036702 | -1.171390 |
| H  | -4.823969 | 0.033716  | -2.379072 |
| C  | 1.517696  | -0.811051 | -1.264917 |
| H  | 1.143567  | 0.122490  | -1.708727 |
| H  | 1.057681  | -1.681472 | -1.750831 |
| N  | 2.995936  | -0.886498 | -1.487205 |
| C  | 3.646833  | 0.332559  | -0.919651 |
| H  | 4.721429  | 0.273845  | -1.133611 |
| H  | 3.201912  | 1.215554  | -1.392652 |
| H  | 3.444546  | 0.337147  | 0.160178  |
| C  | 3.518218  | -2.081433 | -0.766246 |
| H  | 3.276009  | -1.937435 | 0.297518  |
| H  | 3.025219  | -2.974745 | -1.168133 |
| H  | 4.601524  | -2.142169 | -0.926813 |
| C  | 3.284596  | -0.984237 | -2.938145 |
| H  | 2.880965  | -0.095204 | -3.436807 |
| H  | 4.369975  | -1.038219 | -3.084134 |

|   |          |           |           |
|---|----------|-----------|-----------|
| H | 2.805170 | -1.886708 | -3.335619 |
| H | 1.353005 | -0.822608 | -0.178337 |

**[P, Approximation: A Orientation: Upward]**

|    |           |           |           |
|----|-----------|-----------|-----------|
| C  | 1.738126  | 1.111344  | 2.392453  |
| C  | 0.271936  | 1.143139  | 1.870731  |
| O  | 2.589419  | 0.535095  | 1.533350  |
| H  | 1.981177  | 2.182054  | 2.635459  |
| H  | -0.300708 | 1.938389  | 2.369718  |
| S  | -1.250382 | 2.576995  | -2.045968 |
| C  | -1.035269 | 2.191004  | -0.478173 |
| S  | 0.484264  | 1.612143  | 0.104806  |
| Cl | -2.350501 | 2.394513  | 0.672536  |
| H  | 1.655826  | 0.614597  | 3.399155  |
| C  | -0.510074 | -0.152634 | 2.012792  |
| H  | -0.475439 | -0.448624 | 3.080527  |
| H  | -1.569981 | 0.020722  | 1.755426  |
| O  | 0.020440  | -1.177468 | 1.210355  |
| C  | -0.814312 | -2.298578 | 1.117809  |
| H  | -1.108186 | -2.660388 | 2.121548  |
| H  | -0.208991 | -3.094051 | 0.653988  |
| C  | -2.057139 | -2.054398 | 0.283278  |
| C  | -2.031820 | -1.115907 | -0.753810 |
| C  | -3.236505 | -2.761976 | 0.529964  |
| C  | -3.169672 | -0.882104 | -1.524400 |
| H  | -1.113256 | -0.553363 | -0.936260 |
| C  | -4.370830 | -2.542814 | -0.252016 |
| H  | -3.270539 | -3.486197 | 1.348031  |
| C  | -4.341338 | -1.598944 | -1.278410 |
| H  | -3.140544 | -0.128673 | -2.314038 |
| H  | -5.286407 | -3.101157 | -0.048527 |
| H  | -5.232960 | -1.415336 | -1.880170 |
| C  | 2.501644  | -1.430279 | -0.675600 |
| H  | 1.904496  | -1.220819 | -1.572062 |
| H  | 2.570175  | -2.513463 | -0.512655 |
| N  | 3.885518  | -0.907961 | -0.900139 |
| C  | 3.808395  | 0.566950  | -1.128958 |
| H  | 4.824279  | 0.940032  | -1.309451 |
| H  | 3.176326  | 0.748638  | -2.006842 |
| H  | 3.365750  | 0.992023  | -0.210396 |
| C  | 4.682772  | -1.149525 | 0.339663  |
| H  | 4.156146  | -0.622735 | 1.153728  |
| H  | 4.725767  | -2.231363 | 0.515935  |
| H  | 5.693508  | -0.752658 | 0.183981  |
| C  | 4.513166  | -1.578815 | -2.061557 |
| H  | 3.911055  | -1.377528 | -2.955664 |
| H  | 5.527462  | -1.184279 | -2.196609 |
| H  | 4.552638  | -2.658076 | -1.871848 |
| H  | 2.106829  | -0.904730 | 0.211228  |

**[R, Approximation: A Orientation: Downward]**

|    |           |           |           |
|----|-----------|-----------|-----------|
| C  | -1.891521 | 1.444177  | 1.782715  |
| C  | -0.939739 | 0.356830  | 1.565161  |
| O  | -0.490543 | 1.692525  | 1.793839  |
| H  | -2.435740 | 1.841661  | 0.920165  |
| H  | -0.800854 | 0.011025  | 0.532161  |
| S  | -1.889825 | 0.555672  | -1.927621 |
| C  | -2.970794 | -0.284824 | -0.978736 |
| S  | -2.884157 | -1.792060 | -0.295083 |
| Cl | -4.520544 | 0.628715  | -0.614590 |
| H  | -2.384475 | 1.540688  | 2.756022  |
| C  | -0.613256 | -0.644633 | 2.635842  |

|   |           |           |           |
|---|-----------|-----------|-----------|
| H | -0.546313 | -0.125691 | 3.604273  |
| H | -1.425640 | -1.390156 | 2.695371  |
| O | 0.626856  | -1.268728 | 2.398158  |
| C | 0.578460  | -2.378330 | 1.512129  |
| H | -0.448055 | -2.532306 | 1.142085  |
| H | 0.881605  | -3.278599 | 2.072915  |
| C | 1.496831  | -2.184196 | 0.330062  |
| C | 2.876130  | -2.384266 | 0.465096  |
| C | 0.985070  | -1.766800 | -0.903900 |
| C | 3.733894  | -2.170437 | -0.613651 |
| H | 3.277457  | -2.717667 | 1.425486  |
| C | 1.843071  | -1.551300 | -1.985217 |
| H | -0.093569 | -1.615894 | -1.025843 |
| C | 3.217683  | -1.751392 | -1.842958 |
| H | 4.806271  | -2.340083 | -0.499846 |
| H | 1.424674  | -1.236346 | -2.943782 |
| H | 3.886242  | -1.597058 | -2.692340 |
| C | 1.012507  | 2.074703  | -0.992745 |
| H | 0.865821  | 2.931707  | -1.660828 |
| H | 0.162121  | 1.969487  | -0.311629 |
| N | 2.238860  | 2.309285  | -0.170570 |
| C | 2.001631  | 3.456141  | 0.749161  |
| H | 1.170947  | 3.187925  | 1.412058  |
| H | 2.917040  | 3.640149  | 1.323645  |
| H | 1.746045  | 4.338518  | 0.150582  |
| C | 3.391058  | 2.599850  | -1.062949 |
| H | 3.183586  | 3.519801  | -1.621297 |
| H | 4.292826  | 2.721812  | -0.451530 |
| H | 3.515972  | 1.757824  | -1.754001 |
| C | 2.531799  | 1.081868  | 0.627907  |
| H | 1.651566  | 0.815802  | 1.224543  |
| H | 2.771729  | 0.270647  | -0.068249 |
| H | 3.387876  | 1.288911  | 1.281399  |
| H | 1.146342  | 1.152175  | -1.569560 |

**[TS, Approximation: A Orientation: Downward]**

|    |           |           |           |
|----|-----------|-----------|-----------|
| C  | 0.762329  | -2.737139 | 0.455490  |
| C  | 0.678598  | -1.362954 | 0.968392  |
| O  | -0.606506 | -2.665840 | 0.382487  |
| H  | 1.310161  | -2.826523 | -0.501910 |
| H  | 0.414214  | -0.608439 | 0.227737  |
| S  | 1.978792  | -0.223088 | -1.888644 |
| C  | 3.057693  | -0.157693 | -0.647281 |
| S  | 2.855167  | -0.489649 | 0.999661  |
| Cl | 4.728985  | 0.356654  | -1.042277 |
| H  | 1.175458  | -3.468462 | 1.181508  |
| C  | 0.236449  | -1.150276 | 2.400155  |
| H  | -0.249830 | -2.077205 | 2.731799  |
| H  | 1.107617  | -0.971823 | 3.056196  |
| O  | -0.708283 | -0.121413 | 2.556115  |
| C  | -0.200732 | 1.198967  | 2.507511  |
| H  | 0.900461  | 1.195685  | 2.566896  |
| H  | -0.584204 | 1.731809  | 3.393084  |
| C  | -0.637296 | 1.937076  | 1.260846  |
| C  | -1.946598 | 2.425811  | 1.157074  |
| C  | 0.238199  | 2.124743  | 0.187620  |
| C  | -2.371996 | 3.084753  | 0.003831  |
| H  | -2.633043 | 2.299028  | 1.998798  |
| C  | -0.182437 | 2.784425  | -0.969357 |
| H  | 1.261337  | 1.747566  | 0.260200  |
| C  | -1.487969 | 3.264459  | -1.064217 |
| H  | -3.390443 | 3.474157  | -0.057797 |

|   |           |           |           |
|---|-----------|-----------|-----------|
| H | 0.517206  | 2.916375  | -1.796430 |
| H | -1.815543 | 3.787840  | -1.964318 |
| C | -1.860817 | -0.531899 | -1.476278 |
| H | -1.908084 | -0.539423 | -2.571944 |
| H | -1.045717 | -1.166344 | -1.107610 |
| N | -3.129802 | -1.113330 | -0.940604 |
| C | -3.189589 | -2.555598 | -1.314609 |
| H | -2.318949 | -3.043823 | -0.854117 |
| H | -4.129408 | -2.975135 | -0.936067 |
| H | -3.153480 | -2.633185 | -2.407859 |
| C | -4.294154 | -0.382852 | -1.497181 |
| H | -4.301368 | -0.499879 | -2.587105 |
| H | -5.214028 | -0.796587 | -1.067604 |
| H | -4.197813 | 0.677709  | -1.233909 |
| C | -3.124137 | -1.002332 | 0.549714  |
| H | -2.239604 | -1.538045 | 0.916800  |
| H | -3.062079 | 0.058434  | 0.815993  |
| H | -4.053577 | -1.444787 | 0.928964  |
| H | -1.763691 | 0.496120  | -1.103731 |

**[P, Approximation: A Orientation: Downward]**

|    |           |           |           |
|----|-----------|-----------|-----------|
| C  | 0.457713  | -2.695855 | 0.461948  |
| C  | 0.730813  | -1.238546 | 0.959625  |
| O  | -0.852082 | -2.894246 | 0.305991  |
| H  | 1.085526  | -2.821814 | -0.460335 |
| H  | 0.232172  | -0.536211 | 0.276904  |
| S  | 1.741012  | -0.335481 | -1.990417 |
| C  | 2.778072  | -0.397064 | -0.747488 |
| S  | 2.508490  | -0.810422 | 0.908739  |
| Cl | 4.475600  | 0.038851  | -0.953499 |
| H  | 0.961598  | -3.358586 | 1.226215  |
| C  | 0.190377  | -1.043106 | 2.380512  |
| H  | -0.515664 | -1.867413 | 2.554155  |
| H  | 1.001807  | -1.132173 | 3.130321  |
| O  | -0.548456 | 0.135401  | 2.600765  |
| C  | 0.144325  | 1.358155  | 2.472657  |
| H  | 1.236574  | 1.206984  | 2.496112  |
| H  | -0.121407 | 1.977306  | 3.345377  |
| C  | -0.253318 | 2.090192  | 1.208492  |
| C  | -1.573198 | 2.540670  | 1.063300  |
| C  | 0.646668  | 2.298453  | 0.161675  |
| C  | -1.984238 | 3.176778  | -0.106185 |
| H  | -2.279016 | 2.395189  | 1.885441  |
| C  | 0.238034  | 2.930947  | -1.015603 |
| H  | 1.680752  | 1.960577  | 0.267325  |
| C  | -1.077827 | 3.367574  | -1.153684 |
| H  | -3.010836 | 3.537599  | -0.199407 |
| H  | 0.954092  | 3.077167  | -1.826196 |
| H  | -1.396220 | 3.867077  | -2.070345 |
| C  | -1.855879 | -0.599495 | -1.457633 |
| H  | -1.996126 | -0.619982 | -2.545582 |
| H  | -1.123966 | -1.349012 | -1.124299 |
| N  | -3.144611 | -0.985296 | -0.807196 |
| C  | -3.437500 | -2.403726 | -1.168871 |
| H  | -2.581020 | -2.998145 | -0.810962 |
| H  | -4.370606 | -2.702004 | -0.675703 |
| H  | -3.548660 | -2.468909 | -2.258183 |
| C  | -4.232546 | -0.085987 | -1.253724 |
| H  | -4.338603 | -0.164250 | -2.342438 |
| H  | -5.166672 | -0.382541 | -0.761839 |
| H  | -3.969779 | 0.942192  | -0.975451 |
| C  | -2.975757 | -0.907050 | 0.677755  |



|   |           |           |           |
|---|-----------|-----------|-----------|
| H | -2.184484 | -1.639792 | 0.924266  |
| H | -2.664901 | 0.109893  | 0.942823  |
| H | -3.937889 | -1.155068 | 1.143685  |
| H | -1.581765 | 0.412079  | -1.125882 |

**[R, Approximation: B Orientation: Upward]**

|    |           |           |           |
|----|-----------|-----------|-----------|
| C  | 0.807626  | -0.580792 | -2.201085 |
| C  | -0.410864 | -1.383869 | -2.363605 |
| O  | -0.468487 | 0.026626  | -2.251570 |
| H  | -0.814904 | -1.933141 | -1.504861 |
| S  | -3.590956 | -2.347383 | -0.807232 |
| C  | -3.101364 | -1.609087 | 0.580759  |
| Cl | -4.454626 | -0.750991 | 1.512266  |
| S  | -1.598330 | -1.461847 | 1.296007  |
| H  | 1.435178  | -0.381392 | -3.078395 |
| C  | 1.502651  | -0.534503 | -0.876132 |
| H  | 2.342499  | -1.253583 | -0.876560 |
| H  | 0.792178  | -0.839606 | -0.084999 |
| O  | 1.966241  | 0.779217  | -0.644677 |
| C  | 2.651149  | 0.915943  | 0.572622  |
| H  | 2.060993  | 0.487188  | 1.405296  |
| H  | 2.740227  | 1.999052  | 0.754900  |
| C  | 4.034218  | 0.297552  | 0.558130  |
| C  | 4.590160  | -0.242457 | 1.720463  |
| C  | 4.784528  | 0.291562  | -0.622475 |
| C  | 5.882606  | -0.767646 | 1.709197  |
| H  | 4.004037  | -0.256704 | 2.642750  |
| C  | 6.072418  | -0.240658 | -0.637365 |
| H  | 4.341623  | 0.701823  | -1.532514 |
| C  | 6.626468  | -0.768176 | 0.529962  |
| H  | 6.305803  | -1.187582 | 2.623311  |
| H  | 6.648147  | -0.244014 | -1.564671 |
| H  | 7.634846  | -1.185077 | 0.518483  |
| H  | -0.657557 | -1.783752 | -3.352311 |
| C  | -0.642385 | 2.094883  | -0.059232 |
| H  | -0.138895 | 2.817561  | 0.594292  |
| H  | -0.298919 | 2.189091  | -1.093486 |
| N  | -2.112139 | 2.352997  | -0.003157 |
| C  | -2.400842 | 3.744295  | -0.433967 |
| H  | -3.486030 | 3.899155  | -0.419894 |
| H  | -1.912022 | 4.440291  | 0.257915  |
| H  | -2.012693 | 3.884996  | -1.449225 |
| C  | -2.585742 | 2.152051  | 1.396150  |
| H  | -2.047707 | 2.852513  | 2.045858  |
| H  | -3.663895 | 2.344298  | 1.433010  |
| H  | -2.380691 | 1.113456  | 1.687928  |
| C  | -2.807154 | 1.392415  | -0.913535 |
| H  | -2.547364 | 1.647331  | -1.946097 |
| H  | -2.443884 | 0.384227  | -0.693817 |
| H  | -3.887754 | 1.464722  | -0.744840 |
| H  | -0.473929 | 1.066885  | 0.281747  |

**[TS, Approximation: B Orientation: Upward]**

|    |           |           |           |
|----|-----------|-----------|-----------|
| C  | 0.420107  | -1.102840 | -1.387070 |
| C  | -0.371517 | -2.291537 | -1.038332 |
| O  | -0.703634 | -0.342023 | -1.567636 |
| H  | -0.416353 | -2.614724 | 0.005129  |
| S  | -2.758272 | -2.210246 | -0.906694 |
| C  | -3.003628 | -1.515753 | 0.590550  |
| Cl | -4.689026 | -0.843209 | 0.766630  |
| S  | -1.997738 | -1.316842 | 1.883088  |
| H  | 1.043996  | -1.241110 | -2.303408 |

|   |           |           |           |
|---|-----------|-----------|-----------|
| C | 1.346606  | -0.654981 | -0.265009 |
| H | 2.166237  | -1.388744 | -0.131847 |
| H | 0.772264  | -0.611607 | 0.682274  |
| O | 1.865311  | 0.619815  | -0.573949 |
| C | 2.752546  | 1.115080  | 0.386372  |
| H | 2.334107  | 1.006657  | 1.405936  |
| H | 2.855556  | 2.195402  | 0.190087  |
| C | 4.125100  | 0.472893  | 0.333077  |
| C | 4.939833  | 0.432302  | 1.467868  |
| C | 4.607300  | -0.052896 | -0.869585 |
| C | 6.221866  | -0.112653 | 1.401054  |
| H | 4.565605  | 0.828557  | 2.415378  |
| C | 5.885310  | -0.605844 | -0.935860 |
| H | 3.962309  | -0.030384 | -1.750403 |
| C | 6.697845  | -0.633911 | 0.198115  |
| H | 6.848394  | -0.138272 | 2.294450  |
| H | 6.249850  | -1.017437 | -1.878835 |
| H | 7.698363  | -1.066438 | 0.145895  |
| H | -0.505779 | -3.076472 | -1.784803 |
| C | -0.831216 | 1.926459  | 0.203375  |
| H | -0.455866 | 2.585796  | 0.996613  |
| H | -0.155139 | 1.881514  | -0.655233 |
| N | -2.158245 | 2.454406  | -0.235831 |
| C | -1.994032 | 3.843603  | -0.733323 |
| H | -2.974656 | 4.236288  | -1.026491 |
| H | -1.564669 | 4.458234  | 0.066527  |
| H | -1.320671 | 3.825907  | -1.597636 |
| C | -3.093940 | 2.439150  | 0.921696  |
| H | -2.708937 | 3.116185  | 1.693538  |
| H | -4.082424 | 2.771433  | 0.582489  |
| H | -3.151771 | 1.414221  | 1.309284  |
| C | -2.712665 | 1.600914  | -1.330275 |
| H | -1.964603 | 1.515529  | -2.123984 |
| H | -2.883600 | 0.592942  | -0.942593 |
| H | -3.645996 | 2.061367  | -1.676106 |
| H | -0.979395 | 0.900022  | 0.556308  |

**[P, Approximation: B Orientation: Upward]**

|    |           |           |           |
|----|-----------|-----------|-----------|
| C  | 0.331527  | -0.493118 | -0.374831 |
| C  | -0.121177 | -1.882671 | 0.168370  |
| O  | -0.640289 | 0.419235  | -0.317881 |
| H  | -0.350396 | -1.832248 | 1.243028  |
| S  | -1.628807 | -2.408032 | -0.679483 |
| C  | -2.908889 | -1.852720 | 0.329841  |
| Cl | -4.436956 | -2.083286 | -0.544191 |
| S  | -2.903201 | -1.259440 | 1.835980  |
| H  | 0.712172  | -0.694745 | -1.417449 |
| C  | 1.581508  | -0.113552 | 0.429664  |
| H  | 2.317585  | -0.942973 | 0.449594  |
| H  | 1.274510  | 0.098676  | 1.474267  |
| O  | 2.160687  | 1.037717  | -0.138412 |
| C  | 3.317957  | 1.465034  | 0.510088  |
| H  | 3.169816  | 1.508670  | 1.606893  |
| H  | 3.506528  | 2.497238  | 0.170681  |
| C  | 4.540687  | 0.620377  | 0.202785  |
| C  | 5.619996  | 0.574525  | 1.089738  |
| C  | 4.617823  | -0.093461 | -0.997124 |
| C  | 6.763046  | -0.162124 | 0.779930  |
| H  | 5.563265  | 1.119834  | 2.035543  |
| C  | 5.756274  | -0.837153 | -1.304986 |
| H  | 3.766711  | -0.063501 | -1.680620 |
| C  | 6.833875  | -0.871120 | -0.419200 |

|   |           |           |           |
|---|-----------|-----------|-----------|
| H | 7.598856  | -0.189374 | 1.481536  |
| H | 5.803033  | -1.394129 | -2.242709 |
| H | 7.724805  | -1.453357 | -0.660527 |
| H | 0.608335  | -2.686880 | -0.013462 |
| C | -2.450094 | 2.204860  | 1.142804  |
| H | -2.063052 | 3.121922  | 1.604420  |
| H | -1.666307 | 1.433605  | 1.035169  |
| N | -2.894492 | 2.532817  | -0.245812 |
| C | -1.716335 | 3.050658  | -1.006206 |
| H | -2.031489 | 3.242744  | -2.039349 |
| H | -1.386344 | 3.983861  | -0.533428 |
| H | -0.944566 | 2.261104  | -0.950900 |
| C | -3.980284 | 3.539434  | -0.217627 |
| H | -3.616599 | 4.442755  | 0.286782  |
| H | -4.273453 | 3.777200  | -1.247149 |
| H | -4.835295 | 3.123827  | 0.328932  |
| C | -3.370444 | 1.274386  | -0.898686 |
| H | -2.500229 | 0.592671  | -0.910685 |
| H | -4.197122 | 0.868394  | -0.302392 |
| H | -3.717473 | 1.520152  | -1.910100 |
| H | -3.317483 | 1.834513  | 1.702870  |

**[R, Approximation: B Orientation: Downward]**

|    |           |           |           |
|----|-----------|-----------|-----------|
| C  | -0.353360 | 1.623001  | 2.042823  |
| C  | -1.321342 | 0.557015  | 2.320377  |
| O  | -0.070375 | 0.273597  | 1.706895  |
| H  | -2.201015 | 0.448632  | 1.676159  |
| H  | -1.428366 | 0.191126  | 3.346540  |
| S  | -3.844396 | 1.558394  | -0.426857 |
| C  | -3.009129 | 0.202156  | -0.851203 |
| Cl | -3.689307 | -1.372984 | -0.104922 |
| S  | -1.671151 | -0.027782 | -1.810152 |
| H  | 0.246270  | 2.005948  | 2.878300  |
| C  | -0.559265 | 2.580145  | 0.903805  |
| H  | -1.159702 | 3.428666  | 1.269822  |
| H  | -1.133595 | 2.081349  | 0.104842  |
| O  | 0.660112  | 3.096273  | 0.418778  |
| C  | 1.149478  | 2.557543  | -0.777867 |
| H  | 1.473807  | 3.396387  | -1.417509 |
| H  | 0.349102  | 2.027230  | -1.325979 |
| C  | 2.328099  | 1.625127  | -0.591289 |
| C  | 2.945445  | 1.066854  | -1.718880 |
| C  | 2.833822  | 1.323892  | 0.674079  |
| C  | 4.052061  | 0.231738  | -1.583397 |
| H  | 2.557529  | 1.302276  | -2.713757 |
| C  | 3.935130  | 0.475368  | 0.813017  |
| H  | 2.362940  | 1.772865  | 1.548868  |
| C  | 4.551103  | -0.069682 | -0.313102 |
| H  | 4.530311  | -0.184518 | -2.472201 |
| H  | 4.324687  | 0.254708  | 1.809043  |
| H  | 5.422951  | -0.717583 | -0.205116 |
| N  | 0.737297  | -2.733217 | 0.246346  |
| C  | 1.096709  | -4.058499 | -0.318998 |
| H  | 2.185856  | -4.114651 | -0.429024 |
| H  | 0.612702  | -4.165777 | -1.296286 |
| H  | 0.743913  | -4.841909 | 0.362146  |
| C  | -0.747719 | -2.621535 | 0.362126  |
| H  | -1.107735 | -3.410109 | 1.033964  |
| H  | -1.190275 | -2.715781 | -0.634737 |
| H  | -0.987763 | -1.626327 | 0.748517  |
| C  | 1.233339  | -1.645391 | -0.649170 |
| H  | 2.327845  | -1.697204 | -0.686650 |

|   |          |           |           |
|---|----------|-----------|-----------|
| H | 0.900800 | -0.687914 | -0.230635 |
| H | 0.795781 | -1.786552 | -1.643821 |
| C | 1.357691 | -2.571226 | 1.590395  |
| H | 0.972156 | -3.355609 | 2.252520  |
| H | 1.091982 | -1.576809 | 1.968397  |
| H | 2.445442 | -2.662973 | 1.486336  |

**[TS, Approximation: B Orientation: Downward]**

|    |           |           |           |
|----|-----------|-----------|-----------|
| C  | 0.689850  | -0.401583 | 1.875449  |
| C  | 1.542531  | 0.747360  | 1.552369  |
| O  | -0.297455 | 0.558749  | 1.887825  |
| H  | 1.474347  | 1.143487  | 0.539860  |
| H  | 1.799187  | 1.419989  | 2.369247  |
| S  | 3.759535  | 0.146560  | 1.170973  |
| C  | 3.802025  | 0.061009  | -0.514540 |
| Cl | 5.383641  | -0.526207 | -1.127997 |
| S  | 2.661762  | 0.425116  | -1.648980 |
| H  | 0.900781  | -0.879739 | 2.852965  |
| C  | 0.593138  | -1.468823 | 0.806715  |
| H  | 1.590148  | -1.914279 | 0.626066  |
| H  | 0.263440  | -0.996015 | -0.135580 |
| O  | -0.313615 | -2.470529 | 1.217409  |
| C  | -1.045498 | -3.039718 | 0.173813  |
| H  | -1.370067 | -4.036069 | 0.516858  |
| H  | -0.420688 | -3.199751 | -0.724144 |
| C  | -2.278930 | -2.233506 | -0.183817 |
| C  | -2.808657 | -2.250083 | -1.477616 |
| C  | -2.944889 | -1.516177 | 0.816468  |
| C  | -4.003814 | -1.587843 | -1.764515 |
| H  | -2.285135 | -2.795269 | -2.267126 |
| C  | -4.148991 | -0.871888 | 0.535533  |
| H  | -2.498970 | -1.469465 | 1.811380  |
| C  | -4.684456 | -0.906434 | -0.754431 |
| H  | -4.409182 | -1.613282 | -2.777774 |
| H  | -4.677224 | -0.343599 | 1.332250  |
| H  | -5.631487 | -0.408101 | -0.971206 |
| N  | -1.921641 | 2.589324  | -0.185611 |
| C  | -2.665759 | 3.452603  | -1.135369 |
| H  | -3.553806 | 2.910692  | -1.480911 |
| H  | -2.013750 | 3.685416  | -1.985451 |
| H  | -2.961216 | 4.375552  | -0.622295 |
| C  | -0.676397 | 3.274889  | 0.264028  |
| H  | -0.947278 | 4.251537  | 0.682771  |
| H  | -0.011472 | 3.399687  | -0.599030 |
| H  | -0.212072 | 2.633541  | 1.022927  |
| C  | -1.558292 | 1.296614  | -0.844098 |
| H  | -2.481637 | 0.791875  | -1.156503 |
| H  | -1.025674 | 0.706738  | -0.085133 |
| H  | -0.923597 | 1.515560  | -1.711126 |
| C  | -2.758831 | 2.295268  | 1.013784  |
| H  | -2.952014 | 3.237108  | 1.541472  |
| H  | -2.193864 | 1.593635  | 1.644640  |
| H  | -3.699557 | 1.848313  | 0.674695  |

**[P, Approximation: B Orientation: Downward]**

|   |           |          |           |
|---|-----------|----------|-----------|
| C | -0.635443 | 1.234397 | -0.138386 |
| C | -1.833262 | 1.518519 | 0.804772  |
| O | 0.510834  | 1.465208 | 0.522934  |
| H | -1.865796 | 0.797907 | 1.634665  |
| H | -1.688286 | 2.524891 | 1.221141  |
| S | -3.475280 | 1.586369 | 0.025703  |

|    |           |           |           |
|----|-----------|-----------|-----------|
| C  | -4.163267 | 0.022443  | 0.292552  |
| Cl | -5.753960 | -0.023165 | -0.472447 |
| S  | -3.579569 | -1.258455 | 1.090948  |
| H  | -0.787888 | 1.898817  | -1.037599 |
| C  | -0.726187 | -0.196335 | -0.684810 |
| H  | -1.682339 | -0.385525 | -1.213408 |
| H  | -0.658592 | -0.902674 | 0.162569  |
| O  | 0.352294  | -0.383138 | -1.580215 |
| C  | 0.700384  | -1.713893 | -1.804059 |
| H  | 1.246736  | -1.750518 | -2.761048 |
| H  | -0.200943 | -2.345118 | -1.932173 |
| C  | 1.579762  | -2.311965 | -0.719385 |
| C  | 2.059951  | -3.618735 | -0.864538 |
| C  | 1.930365  | -1.577598 | 0.418623  |
| C  | 2.883386  | -4.186072 | 0.105458  |
| H  | 1.785698  | -4.197707 | -1.750971 |
| C  | 2.749843  | -2.153165 | 1.393605  |
| H  | 1.534994  | -0.561741 | 0.541634  |
| C  | 3.231805  | -3.452508 | 1.241155  |
| H  | 3.252329  | -5.205493 | -0.022296 |
| H  | 3.003999  | -1.580837 | 2.288939  |
| H  | 3.870386  | -3.897124 | 2.006535  |
| N  | 3.487728  | 2.346872  | -0.021156 |
| C  | 4.891806  | 2.771141  | -0.231992 |
| H  | 5.539084  | 1.886672  | -0.195942 |
| H  | 5.174407  | 3.476033  | 0.558982  |
| H  | 4.973851  | 3.254791  | -1.212587 |
| C  | 2.571308  | 3.525919  | -0.056436 |
| H  | 2.647119  | 3.992539  | -1.045979 |
| H  | 2.887897  | 4.232911  | 0.720096  |
| H  | 1.561020  | 3.122483  | 0.139347  |
| C  | 3.343965  | 1.678911  | 1.307898  |
| H  | 3.966305  | 0.775444  | 1.306831  |
| H  | 2.276591  | 1.438162  | 1.430854  |
| H  | 3.692489  | 2.375677  | 2.080392  |
| C  | 3.069393  | 1.390025  | -1.090885 |
| H  | 3.160687  | 1.898607  | -2.058497 |
| H  | 2.025935  | 1.107689  | -0.874878 |
| H  | 3.737238  | 0.520136  | -1.056508 |

Neutral reaction (using Choline as a counter cation):

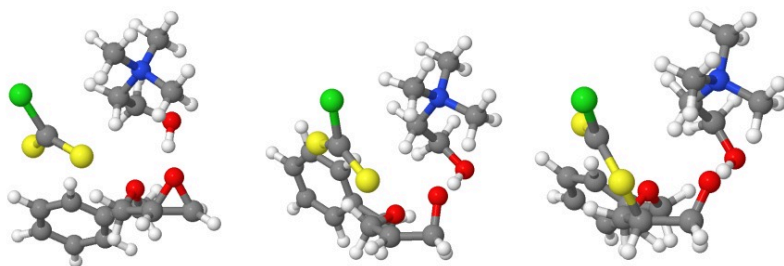

**Figure S31.** Reactant (left), transition state (center) and product (right) of the reaction between  $\text{CS}_2\text{Cl}^-$  + Choline and R1i (upward attack to  $\text{C}_A$ ).

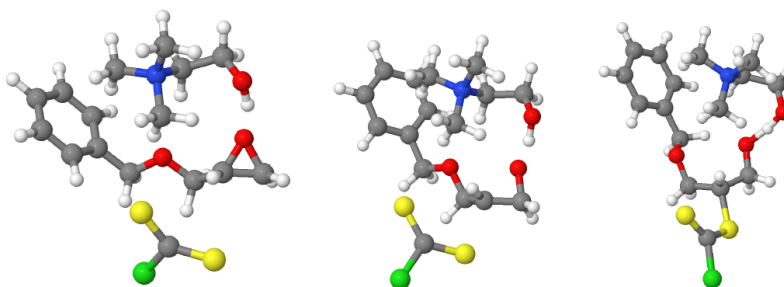

**Figure S32.** Reactant (left), transition state (center) and product (right) of the reaction between  $\text{CS}_2\text{Cl}^-$  + Choline and R1i (downward attack to  $\text{C}_A$ ).

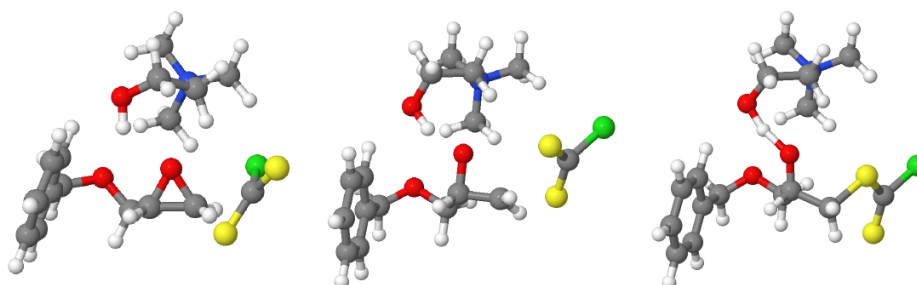

**Figure S33.** Reactant (left), transition state (center) and product (right) of the reaction between  $\text{CS}_2\text{Cl}^-$  + Choline and R1i (upward attack to  $\text{C}_B$ ).

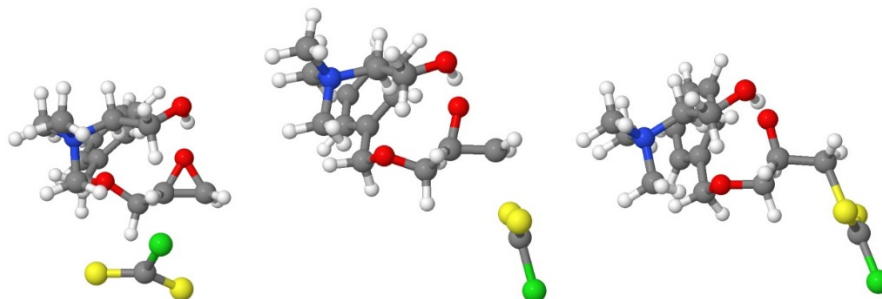

**Figure S34.** Reactant (left), transition state (center) and product (right) of the reaction between  $\text{CS}_2\text{Cl}^-$  + Choline and R1i (downward attack to  $\text{C}_B$ ).

| Approximation | Orientation | R   | TS   | P    |
|---------------|-------------|-----|------|------|
| A             | upward      | 0.0 | 51.8 | 14.9 |
| A             | downward    | 0.0 | 26.1 | 1.0  |
| B             | upward      | 0.0 | 49.9 | 0.8  |
| B             | downward    | 0.0 | 25.8 | 5.2  |

**Table S14.** Energies of the reactants (R), transition state (TS) and products (P) involved in the solvated reaction between  $\text{CS}_2\text{Cl}^-$  + Choline and R1i across various approximations and orientations. All energies are reported, relative to the reactant complex, as the Morokuma-corrected Gibbs free energies (373.15 K).

| Atom         | R     | TS    | P     |
|--------------|-------|-------|-------|
| $\text{C}_A$ | +0.48 | +0.03 | -0.03 |
| $\text{C}_B$ | +0.47 | +0.80 | +0.87 |
| $\text{S}'$  | +0.11 | +0.25 | +0.42 |
| O            | -1.02 | -1.12 | -1.28 |

**Table S15.** Atomic charges (in electrons) for the most relevant atoms involved in the reaction between  $\text{CS}_2\text{Cl}^-$  + Choline and R1i (upward attack to  $\text{C}_A$ ). The results for the reactants (R), transition state (TS) and product (P) are shown.

| Atom         | R     | TS    | P     |
|--------------|-------|-------|-------|
| $\text{C}_A$ | +0.42 | +0.08 | -0.03 |
| $\text{C}_B$ | +0.48 | +0.72 | +0.83 |
| $\text{S}'$  | +0.20 | +0.25 | +0.35 |
| O            | -1.04 | -1.08 | -1.26 |

**Table S16.** Atomic charges (in electrons) for the most relevant atoms involved in the reaction between  $\text{CS}_2\text{Cl}^-$  + Choline and R1i (downward attack to  $\text{C}_A$ ). The results for the reactants (R), transition state (TS) and product (P) are shown.

| Atom         | R     | TS    | P     |
|--------------|-------|-------|-------|
| $\text{C}_A$ | +0.43 | +0.69 | +0.82 |
| $\text{C}_B$ | +0.45 | +0.07 | -0.01 |
| $\text{S}'$  | +0.12 | +0.27 | +0.39 |
| O            | -1.03 | -1.08 | -1.28 |

**Table S17.** Atomic charges (in electrons) for the most relevant atoms involved in the reaction between  $\text{CS}_2\text{Cl}^-$  + Choline and R1i (upward attack to  $\text{C}_B$ ). The results for the reactants (R), transition state (TS) and product (P) are shown.

| Atom         | R     | TS    | P     |
|--------------|-------|-------|-------|
| $\text{C}_A$ | +0.43 | +0.64 | +0.83 |
| $\text{C}_B$ | +0.48 | +0.11 | -0.02 |
| $\text{S}'$  | +0.15 | +0.20 | +0.34 |
| O            | -1.03 | -1.06 | -1.24 |

**Table S18.** Atomic charges (in electrons) for the most relevant atoms involved in the reaction between  $\text{CS}_2\text{Cl}^-$  + Choline and R1i (downward attack to  $\text{C}_B$ ). The results for the reactants (R), transition state (TS) and product (P) are shown.

| Atomic Pair        | R    | TS   | P    |
|--------------------|------|------|------|
| O-C <sub>A</sub>   | 0.89 | 0.34 | 0.11 |
| O-C <sub>B</sub>   | 0.93 | 0.95 | 0.96 |
| C <sub>A</sub> -S' | 0.02 | 0.25 | 0.97 |

**Table S19.** Delocalization Index (DI, in electron pairs) for the most relevant atomic pairs involved in the reaction between CS<sub>2</sub>Cl<sup>-</sup> + Choline and R1i (upward attack to C<sub>A</sub>). The results for the reactants (R), transition state (TS) and product (P) are shown.

| Atomic Pair        | R    | TS   | P    |
|--------------------|------|------|------|
| O-C <sub>A</sub>   | 0.88 | 0.47 | 0.11 |
| O-C <sub>B</sub>   | 0.91 | 0.93 | 0.96 |
| C <sub>A</sub> -S' | 0.03 | 0.49 | 0.98 |

**Table S20.** Delocalization Index (DI, in electron pairs) for the most relevant atomic pairs involved in the reaction between CS<sub>2</sub>Cl<sup>-</sup> + Choline and R1i (downward attack to C<sub>A</sub>). The results for the reactants (R), transition state (TS) and product (P) are shown.

| Atomic Pair        | R    | TS   | P    |
|--------------------|------|------|------|
| O-C <sub>A</sub>   | 0.91 | 0.93 | 0.94 |
| O-C <sub>B</sub>   | 0.91 | 0.42 | 0.11 |
| C <sub>B</sub> -S' | 0.02 | 0.44 | 0.99 |

**Table S21.** Delocalization Index (DI, in electron pairs) for the most relevant atomic pairs involved in the reaction between CS<sub>2</sub>Cl<sup>-</sup> + Choline and R1i (upward attack to C<sub>B</sub>). The results for the reactants (R), transition state (TS) and product (P) are shown.

| Atomic Pair        | R    | TS   | P    |
|--------------------|------|------|------|
| O-C <sub>A</sub>   | 0.88 | 0.92 | 0.96 |
| O-C <sub>B</sub>   | 0.90 | 0.52 | 0.12 |
| C <sub>B</sub> -S' | 0.00 | 0.47 | 1.02 |

**Table S22.** Delocalization Index (DI, in electron pairs) for the most relevant atomic pairs involved in the reaction between CS<sub>2</sub>Cl<sup>-</sup> + Choline and R1i (downward attack to C<sub>B</sub>). The results for the reactants (R), transition state (TS) and product (P) are shown.

The upcoming section comprises the optimized geometries of the reactants (R), transition state (TS) and product (P) involved in the reaction across different approximations and orientations. All values are reported as XYZ Cartesian Coordinates in Angstroms.

**[R, Approximation: A Orientation: Upward]**

|    |           |           |           |
|----|-----------|-----------|-----------|
| C  | 0.474213  | 2.913126  | 2.364873  |
| C  | 0.338885  | 1.455222  | 2.436362  |
| O  | -0.580460 | 2.235805  | 1.699968  |
| H  | 0.170948  | 3.528417  | 3.217655  |
| H  | -0.069313 | 1.003743  | 3.347126  |
| S  | -0.370891 | -2.554688 | -0.100115 |
| C  | -1.773375 | -2.200293 | 0.707617  |
| S  | -2.094893 | -1.128704 | 1.943067  |
| Cl | -3.243994 | -3.128342 | 0.114123  |
| H  | 1.230307  | 3.353133  | 1.704812  |
| C  | 1.207338  | 0.539697  | 1.610474  |
| H  | 2.119133  | 0.275886  | 2.172876  |
| H  | 0.652527  | -0.390521 | 1.402140  |
| O  | 1.520943  | 1.172366  | 0.386217  |



|   |           |           |           |
|---|-----------|-----------|-----------|
| C | 2.869541  | 1.486344  | 0.157129  |
| H | 3.308840  | 1.989317  | 1.039255  |
| H | 2.874137  | 2.216621  | -0.668329 |
| C | 3.713424  | 0.287199  | -0.219529 |
| C | 3.127509  | -0.952577 | -0.482373 |
| C | 5.102442  | 0.424115  | -0.324682 |
| C | 3.921581  | -2.042043 | -0.846414 |
| H | 2.045639  | -1.071805 | -0.388507 |
| C | 5.892735  | -0.660772 | -0.695559 |
| H | 5.567984  | 1.390791  | -0.114202 |
| C | 5.302975  | -1.899564 | -0.957203 |
| H | 3.450476  | -3.007503 | -1.040369 |
| H | 6.974766  | -0.542196 | -0.776046 |
| H | 5.922279  | -2.751734 | -1.241959 |
| C | -1.543664 | 0.516836  | -1.273486 |
| N | -2.898970 | 1.203001  | -1.261937 |
| C | -3.947478 | 0.158963  | -1.068787 |
| H | -4.922247 | 0.657357  | -1.005282 |
| H | -3.924199 | -0.530664 | -1.920407 |
| H | -3.733908 | -0.382271 | -0.138556 |
| C | -2.982299 | 2.164308  | -0.121369 |
| H | -2.823195 | 1.605580  | 0.808297  |
| H | -2.192020 | 2.909439  | -0.239876 |
| H | -3.977901 | 2.623825  | -0.137275 |
| C | -3.150511 | 1.926623  | -2.534682 |
| H | -3.017843 | 1.231259  | -3.372446 |
| H | -4.180307 | 2.302317  | -2.519490 |
| H | -2.447350 | 2.763059  | -2.610750 |
| C | -0.418406 | 1.306899  | -1.917292 |
| H | -1.675775 | -0.439668 | -1.796948 |
| H | -1.311526 | 0.294544  | -0.221306 |
| O | -0.187224 | 2.546968  | -1.314971 |
| H | -0.617047 | 1.480967  | -2.985311 |
| H | 0.466294  | 0.648699  | -1.860550 |
| H | 0.167002  | 2.350876  | -0.428515 |

**[TS, Approximation: A Orientation: Upward]**

|    |           |           |           |
|----|-----------|-----------|-----------|
| C  | 0.698696  | -1.366361 | 3.009614  |
| C  | 0.076520  | -0.041926 | 2.839863  |
| O  | 1.154114  | -1.528171 | 1.729584  |
| H  | 1.488938  | -1.343267 | 3.786161  |
| H  | 0.382416  | 0.840275  | 3.401815  |
| S  | 0.363111  | 2.397322  | -0.410255 |
| C  | 1.836641  | 2.192402  | 0.317965  |
| S  | 2.262829  | 1.472595  | 1.757242  |
| Cl | 3.262096  | 2.834521  | -0.622316 |
| H  | -0.070605 | -2.103297 | 3.339623  |
| C  | -1.101482 | 0.158010  | 1.995095  |
| H  | -1.875648 | 0.523463  | 2.711146  |
| H  | -0.916518 | 1.013558  | 1.307393  |
| O  | -1.504025 | -0.999531 | 1.335238  |
| C  | -2.884105 | -1.143751 | 1.128528  |
| H  | -3.431115 | -1.066030 | 2.087444  |
| H  | -3.014890 | -2.175923 | 0.766461  |
| C  | -3.471151 | -0.168879 | 0.129761  |
| C  | -2.656261 | 0.486652  | -0.796479 |
| C  | -4.850369 | 0.064168  | 0.106115  |
| C  | -3.209189 | 1.364033  | -1.730134 |
| H  | -1.576422 | 0.329609  | -0.766351 |
| C  | -5.405661 | 0.929678  | -0.834166 |
| H  | -5.495297 | -0.436185 | 0.833204  |
| C  | -4.585227 | 1.584144  | -1.754762 |

|   |           |           |           |
|---|-----------|-----------|-----------|
| H | -2.556639 | 1.882082  | -2.435595 |
| H | -6.483209 | 1.102902  | -0.842621 |
| H | -5.018629 | 2.270859  | -2.483655 |
| C | 0.653710  | -1.296540 | -1.201085 |
| N | 2.083797  | -1.620042 | -1.586178 |
| C | 2.865323  | -0.353722 | -1.487925 |
| H | 3.865613  | -0.519969 | -1.905187 |
| H | 2.342357  | 0.434967  | -2.041571 |
| H | 2.933608  | -0.081615 | -0.427839 |
| C | 2.700753  | -2.620430 | -0.661216 |
| H | 2.549169  | -2.269175 | 0.368847  |
| H | 2.199337  | -3.583083 | -0.792346 |
| H | 3.765511  | -2.690349 | -0.915597 |
| C | 2.140927  | -2.126930 | -2.979977 |
| H | 1.752462  | -1.353992 | -3.653812 |
| H | 3.184741  | -2.351961 | -3.228801 |
| H | 1.538079  | -3.037640 | -3.059874 |
| C | -0.264829 | -2.492375 | -0.986153 |
| H | 0.274846  | -0.650818 | -2.005833 |
| H | 0.714913  | -0.721574 | -0.264529 |
| O | 0.013271  | -3.221835 | 0.155287  |
| H | -0.245887 | -3.164661 | -1.864270 |
| H | -1.282073 | -2.050793 | -0.974683 |
| H | 0.345049  | -2.575361 | 0.860167  |

**[P, Approximation: A Orientation: Upward]**

|    |           |           |           |
|----|-----------|-----------|-----------|
| C  | 0.803593  | -0.084977 | 2.760993  |
| C  | 0.299576  | 1.260306  | 2.157234  |
| O  | 1.353247  | -0.932696 | 1.870004  |
| H  | 1.504917  | 0.197714  | 3.583961  |
| H  | 0.146958  | 1.987499  | 2.970999  |
| S  | 0.385281  | 1.833406  | -1.426099 |
| C  | 1.584468  | 2.142497  | -0.385448 |
| S  | 1.749234  | 2.033685  | 1.320610  |
| Cl | 3.142589  | 2.770823  | -0.997812 |
| H  | -0.101153 | -0.487154 | 3.286764  |
| C  | -1.041751 | 1.141998  | 1.439608  |
| H  | -1.799934 | 1.163477  | 2.243154  |
| H  | -1.236990 | 2.011950  | 0.791394  |
| O  | -1.154484 | -0.060869 | 0.726151  |
| C  | -2.317564 | -0.804085 | 0.974937  |
| H  | -2.567631 | -0.784039 | 2.052245  |
| H  | -2.071596 | -1.851065 | 0.740858  |
| C  | -3.511413 | -0.337227 | 0.170030  |
| C  | -3.347072 | 0.532400  | -0.910860 |
| C  | -4.795535 | -0.798572 | 0.482406  |
| C  | -4.449009 | 0.935587  | -1.667341 |
| H  | -2.342422 | 0.890316  | -1.146246 |
| C  | -5.894663 | -0.401398 | -0.275534 |
| H  | -4.932984 | -1.476350 | 1.329118  |
| C  | -5.724466 | 0.469304  | -1.353939 |
| H  | -4.308327 | 1.619070  | -2.506852 |
| H  | -6.890850 | -0.768527 | -0.021753 |
| H  | -6.585944 | 0.784636  | -1.945011 |
| C  | 1.145532  | -1.550463 | -0.941194 |
| N  | 2.595105  | -2.006686 | -0.864526 |
| C  | 3.426245  | -0.778637 | -0.721391 |
| H  | 4.487061  | -1.057709 | -0.747106 |
| H  | 3.192806  | -0.097038 | -1.548907 |
| H  | 3.155256  | -0.325644 | 0.242380  |
| C  | 2.872988  | -2.895236 | 0.308513  |
| H  | 2.589800  | -2.350557 | 1.218490  |

|   |           |           |           |
|---|-----------|-----------|-----------|
| H | 2.276729  | -3.807533 | 0.212788  |
| H | 3.944272  | -3.131580 | 0.288236  |
| C | 2.951601  | -2.725478 | -2.112923 |
| H | 2.850385  | -2.038451 | -2.961257 |
| H | 3.985567  | -3.082864 | -2.039551 |
| H | 2.270389  | -3.575863 | -2.235182 |
| C | 0.108221  | -2.580552 | -0.529813 |
| H | 0.997146  | -1.213990 | -1.976112 |
| H | 1.049845  | -0.708922 | -0.246655 |
| O | 0.057040  | -2.792886 | 0.831790  |
| H | 0.269659  | -3.537623 | -1.069563 |
| H | -0.844267 | -2.173673 | -0.935724 |
| H | 0.508374  | -1.977902 | 1.326614  |

**[R, Approximation: A Orientation: Downward]**

|    |           |           |           |
|----|-----------|-----------|-----------|
| C  | -2.088330 | -2.805650 | -1.631485 |
| C  | -1.489181 | -1.640310 | -0.984055 |
| O  | -0.678681 | -2.722097 | -1.452508 |
| H  | -2.598495 | -3.547959 | -1.011612 |
| H  | -1.565567 | -1.553258 | 0.106648  |
| S  | -1.749115 | 0.819237  | 1.752271  |
| C  | -3.186131 | 0.647020  | 0.930856  |
| S  | -4.214615 | -0.636657 | 0.780883  |
| Cl | -3.706908 | 2.164877  | 0.006030  |
| H  | -2.421193 | -2.736526 | -2.671606 |
| C  | -1.330991 | -0.346458 | -1.718151 |
| H  | -1.306959 | -0.532224 | -2.808673 |
| H  | -2.207074 | 0.287173  | -1.494272 |
| O  | -0.141178 | 0.282216  | -1.299766 |
| C  | -0.185160 | 1.687158  | -1.466006 |
| H  | -1.048999 | 2.093387  | -0.912692 |
| H  | -0.310979 | 1.931636  | -2.537589 |
| C  | 1.092611  | 2.286379  | -0.946285 |
| C  | 1.143037  | 2.824284  | 0.344511  |
| C  | 2.254148  | 2.273381  | -1.728013 |
| C  | 2.337235  | 3.347819  | 0.842742  |
| H  | 0.234443  | 2.817533  | 0.952740  |
| C  | 3.449108  | 2.791794  | -1.229773 |
| H  | 2.214857  | 1.858953  | -2.738556 |
| C  | 3.491597  | 3.329984  | 0.058461  |
| H  | 2.365277  | 3.774117  | 1.847240  |
| H  | 4.347725  | 2.785485  | -1.849454 |
| H  | 4.423593  | 3.745280  | 0.446348  |
| H  | 0.292499  | -3.615866 | -0.301805 |
| O  | 1.090606  | -3.889772 | 0.192496  |
| C  | 2.184874  | -3.408439 | -0.524617 |
| H  | 3.081342  | -3.934215 | -0.162516 |
| H  | 2.109868  | -3.629225 | -1.604493 |
| C  | 2.393314  | -1.902597 | -0.423412 |
| H  | 3.350319  | -1.644942 | -0.898315 |
| H  | 1.590396  | -1.339824 | -0.923926 |
| N  | 2.443142  | -1.364607 | 0.992210  |
| C  | 3.186145  | -0.073174 | 0.970582  |
| H  | 2.712783  | 0.583722  | 0.232361  |
| H  | 3.130866  | 0.380246  | 1.966820  |
| H  | 4.229899  | -0.268343 | 0.697855  |
| C  | 3.119334  | -2.305933 | 1.924282  |
| H  | 4.118805  | -2.538232 | 1.537154  |
| H  | 3.202403  | -1.815678 | 2.901247  |
| H  | 2.513052  | -3.214084 | 2.007640  |
| C  | 1.048981  | -1.093374 | 1.474401  |
| H  | 0.581708  | -0.371298 | 0.792814  |

|   |          |           |          |
|---|----------|-----------|----------|
| H | 0.497507 | -2.037961 | 1.472305 |
| H | 1.107491 | -0.683899 | 2.489888 |

**[TS, Approximation: A Orientation: Downward]**

|    |           |           |           |
|----|-----------|-----------|-----------|
| C  | 1.701803  | 2.508891  | -1.615945 |
| C  | 1.658275  | 1.188539  | -0.981154 |
| O  | 0.331398  | 2.445544  | -1.463882 |
| H  | 2.227952  | 3.284261  | -1.029883 |
| H  | 1.495860  | 1.174318  | 0.094536  |
| S  | 2.225424  | -1.275171 | 1.177480  |
| C  | 3.631585  | -0.692749 | 0.541130  |
| S  | 3.889214  | 0.523794  | -0.599296 |
| Cl | 5.157096  | -1.439641 | 1.115529  |
| H  | 2.065323  | 2.523375  | -2.660885 |
| C  | 1.138042  | 0.006148  | -1.760386 |
| H  | 1.026171  | 0.294964  | -2.821013 |
| H  | 1.862796  | -0.819933 | -1.699920 |
| O  | -0.097670 | -0.433533 | -1.238937 |
| C  | -0.348818 | -1.780684 | -1.563789 |
| H  | 0.436946  | -2.425495 | -1.129920 |
| H  | -0.325427 | -1.914925 | -2.662366 |
| C  | -1.698844 | -2.177163 | -1.032076 |
| C  | -1.816954 | -3.059032 | 0.045399  |
| C  | -2.859349 | -1.627965 | -1.593341 |
| C  | -3.074627 | -3.394453 | 0.552525  |
| H  | -0.914429 | -3.484169 | 0.490866  |
| C  | -4.114807 | -1.957650 | -1.087433 |
| H  | -2.768909 | -0.938097 | -2.436147 |
| C  | -4.224311 | -2.843101 | -0.011626 |
| H  | -3.154751 | -4.089572 | 1.390026  |
| H  | -5.013187 | -1.530588 | -1.537147 |
| H  | -5.207684 | -3.108368 | 0.380533  |
| H  | -0.385002 | 3.349772  | -0.475653 |
| O  | -1.084862 | 3.782207  | 0.123946  |
| C  | -2.285501 | 3.238709  | -0.304874 |
| H  | -3.116233 | 3.782789  | 0.174732  |
| H  | -2.435200 | 3.348006  | -1.396385 |
| C  | -2.421597 | 1.742937  | -0.034924 |
| H  | -3.441493 | 1.413337  | -0.279846 |
| H  | -1.695830 | 1.169395  | -0.632165 |
| N  | -2.168388 | 1.345168  | 1.409692  |
| C  | -2.864389 | 0.056876  | 1.674171  |
| H  | -2.542669 | -0.669527 | 0.920073  |
| H  | -2.587874 | -0.292901 | 2.676254  |
| H  | -3.946984 | 0.217759  | 1.611307  |
| C  | -2.662622 | 2.375452  | 2.361494  |
| H  | -3.725417 | 2.561339  | 2.165240  |
| H  | -2.532641 | 1.989638  | 3.379433  |
| H  | -2.075330 | 3.288577  | 2.218661  |
| C  | -0.701456 | 1.136857  | 1.616420  |
| H  | -0.373386 | 0.326508  | 0.952501  |
| H  | -0.195854 | 2.070388  | 1.353810  |
| H  | -0.532380 | 0.875475  | 2.668006  |

**[P, Approximation: A Orientation: Downward]**

|   |           |           |           |
|---|-----------|-----------|-----------|
| C | 1.248312  | 1.146398  | -1.796806 |
| C | 1.846246  | 0.133312  | -0.791821 |
| O | -0.096583 | 1.270433  | -1.657192 |
| H | 1.795622  | 2.106443  | -1.635727 |
| H | 1.643833  | 0.465569  | 0.237029  |
| S | 3.455984  | -0.765578 | 1.879814  |
| C | 4.261777  | -0.352935 | 0.536781  |

|    |           |           |           |
|----|-----------|-----------|-----------|
| S  | 3.663543  | 0.179883  | -0.998191 |
| Cl | 6.021293  | -0.384467 | 0.477541  |
| H  | 1.559088  | 0.804912  | -2.817376 |
| C  | 1.378738  | -1.317444 | -0.955491 |
| H  | 1.451181  | -1.601843 | -2.021698 |
| H  | 2.052870  | -1.976473 | -0.386352 |
| O  | 0.082669  | -1.544513 | -0.462734 |
| C  | -0.938359 | -1.592840 | -1.430868 |
| H  | -0.714246 | -2.390114 | -2.168216 |
| H  | -0.998660 | -0.628438 | -1.962990 |
| C  | -2.246241 | -1.912990 | -0.753456 |
| C  | -2.278219 | -2.626147 | 0.450478  |
| C  | -3.455714 | -1.517423 | -1.337705 |
| C  | -3.496114 | -2.941210 | 1.054414  |
| H  | -1.334472 | -2.922478 | 0.909898  |
| C  | -4.673598 | -1.833523 | -0.735921 |
| H  | -3.438574 | -0.952454 | -2.273301 |
| C  | -4.697459 | -2.546723 | 0.463996  |
| H  | -3.506806 | -3.500116 | 1.992133  |
| H  | -5.608170 | -1.520357 | -1.205050 |
| H  | -5.649539 | -2.795215 | 0.936024  |
| H  | -0.422774 | 2.455945  | -1.189483 |
| O  | -0.850033 | 3.368043  | -0.730737 |
| C  | -2.202524 | 3.197544  | -0.883433 |
| H  | -2.754978 | 4.053205  | -0.449379 |
| H  | -2.527894 | 3.147895  | -1.946298 |
| C  | -2.734932 | 1.899871  | -0.272380 |
| H  | -3.833204 | 1.874672  | -0.321127 |
| H  | -2.319591 | 1.032286  | -0.801881 |
| N  | -2.363502 | 1.693725  | 1.185092  |
| C  | -3.307113 | 0.702881  | 1.767419  |
| H  | -3.285227 | -0.201798 | 1.148939  |
| H  | -2.987781 | 0.466453  | 2.789428  |
| H  | -4.316153 | 1.131884  | 1.774115  |
| C  | -2.444816 | 2.970307  | 1.943436  |
| H  | -3.448595 | 3.395172  | 1.822379  |
| H  | -2.253995 | 2.753911  | 3.001241  |
| H  | -1.683211 | 3.649723  | 1.544948  |
| C  | -0.972016 | 1.151767  | 1.299659  |
| H  | -0.910345 | 0.200287  | 0.756673  |
| H  | -0.298518 | 1.875228  | 0.835464  |
| H  | -0.755991 | 1.009901  | 2.366289  |

**[R, Approximation: B Orientation: Upward]**

|    |           |           |           |
|----|-----------|-----------|-----------|
| C  | -1.486957 | -1.344216 | 0.722873  |
| C  | -0.465983 | -1.654198 | 1.730269  |
| O  | -0.838134 | -0.312548 | 1.448820  |
| H  | 0.540945  | -1.946095 | 1.409266  |
| S  | 3.211993  | -1.121884 | 1.718508  |
| C  | 3.270538  | -1.711656 | 0.163661  |
| Cl | 4.602472  | -0.955124 | -0.885649 |
| S  | 2.360154  | -2.848861 | -0.617235 |
| H  | -2.542250 | -1.478556 | 0.985174  |
| C  | -1.128037 | -1.338186 | -0.740772 |
| H  | -1.618757 | -2.170617 | -1.273610 |
| H  | -0.039058 | -1.463249 | -0.842203 |
| O  | -1.452103 | -0.096542 | -1.343837 |
| C  | -2.726135 | -0.007362 | -1.954069 |
| H  | -2.826233 | -0.794605 | -2.721331 |
| H  | -2.735174 | 0.967010  | -2.463527 |
| C  | -3.869750 | -0.095118 | -0.970689 |
| C  | -4.778904 | -1.153753 | -1.016558 |

|   |           |           |           |
|---|-----------|-----------|-----------|
| C | -3.991326 | 0.868890  | 0.039171  |
| C | -5.797122 | -1.255527 | -0.066055 |
| H | -4.685522 | -1.910487 | -1.799611 |
| C | -5.003251 | 0.766445  | 0.989615  |
| H | -3.273363 | 1.692244  | 0.083295  |
| C | -5.907614 | -0.297699 | 0.939803  |
| H | -6.501252 | -2.088114 | -0.109683 |
| H | -5.089433 | 1.518942  | 1.775346  |
| H | -6.699607 | -0.377613 | 1.686351  |
| H | -0.788589 | -2.022652 | 2.709023  |
| C | 1.730898  | 1.259476  | -1.263081 |
| H | 0.656182  | 1.278334  | -1.468678 |
| H | 2.035384  | 0.277346  | -0.882150 |
| N | 2.047735  | 2.290921  | -0.224813 |
| C | 1.749548  | 3.645093  | -0.766116 |
| H | 1.925546  | 4.387505  | 0.021474  |
| H | 2.425124  | 3.830243  | -1.609364 |
| H | 0.706425  | 3.670034  | -1.097298 |
| C | 3.502489  | 2.206540  | 0.103082  |
| H | 4.075313  | 2.280684  | -0.828394 |
| H | 3.754950  | 3.035305  | 0.774768  |
| H | 3.697845  | 1.241786  | 0.590207  |
| C | 1.260709  | 2.003926  | 1.038239  |
| H | 2.303951  | 1.495525  | -2.167725 |
| C | -0.153743 | 2.566242  | 1.060935  |
| H | 1.828951  | 2.434321  | 1.874352  |
| H | 1.260213  | 0.911168  | 1.150578  |
| O | -0.907824 | 2.291164  | -0.081720 |
| H | -0.618287 | 2.162699  | 1.976207  |
| H | -0.122425 | 3.661110  | 1.167225  |
| H | -1.049080 | 1.330346  | -0.178290 |

**[TS, Approximation: B Orientation: Upward]**

|    |           |           |           |
|----|-----------|-----------|-----------|
| C  | 1.098701  | -1.208068 | -0.367375 |
| C  | 0.064051  | -2.070502 | -0.937623 |
| O  | 0.472215  | -0.101907 | -0.917650 |
| H  | -0.583065 | -2.682003 | -0.302836 |
| S  | -2.244544 | -1.227826 | -1.533438 |
| C  | -3.173326 | -1.673662 | -0.203474 |
| Cl | -4.909758 | -1.177863 | -0.363658 |
| S  | -2.750814 | -2.440483 | 1.188899  |
| H  | 2.113838  | -1.406219 | -0.771122 |
| C  | 1.122052  | -1.186559 | 1.160428  |
| H  | 1.688089  | -2.050132 | 1.559574  |
| H  | 0.084323  | -1.270924 | 1.525690  |
| O  | 1.635732  | 0.027690  | 1.659068  |
| C  | 3.000553  | 0.025769  | 1.996871  |
| H  | 3.206750  | -0.751379 | 2.756877  |
| H  | 3.189501  | 1.005342  | 2.460642  |
| C  | 3.928322  | -0.169086 | 0.817648  |
| C  | 4.814516  | -1.247096 | 0.771138  |
| C  | 3.874388  | 0.719731  | -0.264517 |
| C  | 5.640495  | -1.441611 | -0.338215 |
| H  | 4.853967  | -1.947546 | 1.609392  |
| C  | 4.694734  | 0.524173  | -1.372462 |
| H  | 3.167074  | 1.552535  | -0.237986 |
| C  | 5.579007  | -0.557250 | -1.412942 |
| H  | 6.327667  | -2.289224 | -0.363954 |
| H  | 4.643540  | 1.217589  | -2.213929 |
| H  | 6.219090  | -0.708871 | -2.283910 |
| H  | 0.177642  | -2.373399 | -1.978901 |
| C  | -1.388174 | 1.195478  | 1.187993  |

|   |           |          |           |
|---|-----------|----------|-----------|
| H | -0.334197 | 1.378449 | 1.417506  |
| H | -1.471038 | 0.273600 | 0.603534  |
| N | -1.916090 | 2.322770 | 0.348619  |
| C | -1.696070 | 3.604428 | 1.065252  |
| H | -2.038969 | 4.432874 | 0.433016  |
| H | -2.269843 | 3.582023 | 1.999141  |
| H | -0.626753 | 3.699026 | 1.283603  |
| C | -3.375014 | 2.101626 | 0.140594  |
| H | -3.859046 | 1.971042 | 1.115568  |
| H | -3.795233 | 2.969199 | -0.381596 |
| H | -3.503326 | 1.196236 | -0.464973 |
| C | -1.267966 | 2.344271 | -1.021285 |
| H | -1.998613 | 1.146687 | 2.098228  |
| C | 0.142867  | 2.912887 | -1.057132 |
| H | -1.926960 | 2.943212 | -1.665443 |
| H | -1.262762 | 1.300035 | -1.360073 |
| O | 1.004828  | 2.312553 | -0.150964 |
| H | 0.472657  | 2.796185 | -2.108185 |
| H | 0.125014  | 3.997321 | -0.858589 |
| H | 0.947868  | 1.321690 | -0.329818 |

**[P, Approximation: B Orientation: Upward]**

|    |           |           |           |
|----|-----------|-----------|-----------|
| C  | 0.680377  | -0.870447 | -0.656455 |
| C  | -0.262197 | -1.838058 | -1.401467 |
| O  | 0.421940  | 0.399966  | -1.048330 |
| H  | -0.253867 | -2.879388 | -1.049440 |
| S  | -1.973830 | -1.218589 | -1.348309 |
| C  | -2.772431 | -2.207037 | -0.181187 |
| Cl | -4.433040 | -1.610304 | -0.008760 |
| S  | -2.244136 | -3.465911 | 0.688389  |
| H  | 1.702579  | -1.227833 | -0.936330 |
| C  | 0.530557  | -1.072908 | 0.862525  |
| H  | 0.879572  | -2.078841 | 1.168449  |
| H  | -0.538097 | -1.003445 | 1.129038  |
| O  | 1.186844  | -0.073083 | 1.611624  |
| C  | 2.487324  | -0.379687 | 2.038725  |
| H  | 2.491792  | -1.328117 | 2.609631  |
| H  | 2.766603  | 0.425452  | 2.735975  |
| C  | 3.515722  | -0.462067 | 0.930728  |
| C  | 4.334673  | -1.585305 | 0.798436  |
| C  | 3.645121  | 0.592347  | 0.016953  |
| C  | 5.276920  | -1.662653 | -0.229463 |
| H  | 4.228902  | -2.414018 | 1.503479  |
| C  | 4.581277  | 0.512080  | -1.010937 |
| H  | 2.988713  | 1.462757  | 0.097949  |
| C  | 5.399417  | -0.613586 | -1.137949 |
| H  | 5.909267  | -2.547424 | -0.323763 |
| H  | 4.670173  | 1.333635  | -1.724329 |
| H  | 6.129700  | -0.672228 | -1.947191 |
| H  | -0.017026 | -1.809763 | -2.471726 |
| C  | -1.465309 | 1.665222  | 1.130093  |
| H  | -0.377250 | 1.580847  | 1.212349  |
| H  | -1.861298 | 0.805247  | 0.579360  |
| N  | -1.802221 | 2.899859  | 0.351482  |
| C  | -1.345665 | 4.089780  | 1.117224  |
| H  | -1.541817 | 4.993107  | 0.526875  |
| H  | -1.904871 | 4.128001  | 2.059660  |
| H  | -0.273499 | 3.974098  | 1.310429  |
| C  | -3.277231 | 2.950222  | 0.177855  |
| H  | -3.752772 | 2.900059  | 1.164597  |
| H  | -3.549343 | 3.884384  | -0.326872 |
| H  | -3.584101 | 2.089127  | -0.428242 |

|   |           |          |           |
|---|-----------|----------|-----------|
| C | -1.162946 | 2.860617 | -1.026271 |
| H | -1.946365 | 1.751891 | 2.112840  |
| C | 0.314539  | 3.255973 | -1.040452 |
| H | -1.750875 | 3.538781 | -1.660810 |
| H | -1.255122 | 1.821233 | -1.369288 |
| O | 1.076081  | 2.541091 | -0.146230 |
| H | 0.625019  | 3.112693 | -2.097587 |
| H | 0.406737  | 4.341604 | -0.846378 |
| H | 0.912119  | 1.495538 | -0.448066 |

**[R, Approximation: B Orientation: Downward]**

|    |           |           |           |
|----|-----------|-----------|-----------|
| C  | -0.360881 | -0.833026 | 1.068069  |
| C  | -0.492264 | -1.431205 | 2.390670  |
| O  | 0.224776  | -0.210576 | 2.213185  |
| H  | 0.126629  | -2.293202 | 2.656563  |
| H  | -1.451630 | -1.343074 | 2.908051  |
| S  | -2.428989 | -1.485930 | -2.100196 |
| C  | -2.859171 | -1.956522 | -0.573166 |
| Cl | -3.855545 | -0.629497 | 0.375482  |
| S  | -2.601460 | -3.325399 | 0.298507  |
| H  | -1.233832 | -0.306460 | 0.667401  |
| C  | 0.600029  | -1.351631 | 0.048292  |
| H  | 0.079525  | -2.062599 | -0.618411 |
| H  | 1.433585  | -1.869923 | 0.553870  |
| O  | 1.079036  | -0.240050 | -0.691120 |
| C  | 2.195006  | -0.532410 | -1.491238 |
| H  | 2.233515  | 0.236709  | -2.279479 |
| H  | 2.060689  | -1.502840 | -2.002453 |
| C  | 3.501836  | -0.524355 | -0.722871 |
| C  | 4.678091  | -0.933213 | -1.361530 |
| C  | 3.562027  | -0.090271 | 0.603854  |
| C  | 5.897081  | -0.899508 | -0.689040 |
| H  | 4.636324  | -1.281955 | -2.396788 |
| C  | 4.783838  | -0.063367 | 1.279547  |
| H  | 2.644339  | 0.207820  | 1.115990  |
| C  | 5.953230  | -0.462973 | 0.636036  |
| H  | 6.807467  | -1.219952 | -1.198640 |
| H  | 4.818153  | 0.270368  | 2.318125  |
| H  | 6.906777  | -0.440855 | 1.166031  |
| N  | -0.909723 | 2.828574  | -0.848434 |
| C  | -1.851165 | 3.977281  | -0.922113 |
| H  | -2.789978 | 3.706045  | -0.427709 |
| H  | -2.044751 | 4.198863  | -1.977914 |
| H  | -1.394878 | 4.844944  | -0.429818 |
| C  | 0.293384  | 3.117076  | -1.677604 |
| H  | 0.760644  | 4.041590  | -1.319633 |
| H  | -0.018337 | 3.225737  | -2.722622 |
| H  | 0.987244  | 2.274386  | -1.572510 |
| C  | -1.565632 | 1.595197  | -1.392246 |
| H  | -2.431746 | 1.322190  | -0.778778 |
| H  | -0.826877 | 0.786952  | -1.383793 |
| H  | -1.891722 | 1.800464  | -2.418438 |
| C  | -0.441669 | 2.598825  | 0.562911  |
| C  | -1.528306 | 2.399747  | 1.620291  |
| H  | 0.164292  | 3.471841  | 0.842626  |
| H  | 0.214102  | 1.716233  | 0.519653  |
| O  | -0.901530 | 2.228672  | 2.853165  |
| H  | -2.192090 | 1.552875  | 1.364448  |
| H  | -2.159867 | 3.297943  | 1.694191  |
| H  | -0.448913 | 1.366370  | 2.821896  |

**[TS, Approximation: B Orientation: Downward]**



|    |           |           |           |
|----|-----------|-----------|-----------|
| C  | 0.729454  | -1.088297 | 0.337281  |
| C  | 1.820753  | -1.225108 | 1.292417  |
| O  | 0.027226  | -0.955950 | 1.529037  |
| H  | 2.220450  | -0.320127 | 1.748305  |
| H  | 1.934657  | -2.182945 | 1.795595  |
| S  | 3.862257  | -1.582916 | 0.086333  |
| C  | 4.466621  | -0.014552 | -0.067968 |
| Cl | 6.002967  | 0.039517  | -1.008645 |
| S  | 3.893290  | 1.421141  | 0.494881  |
| H  | 0.496219  | -1.999878 | -0.248858 |
| C  | 0.714676  | 0.133339  | -0.544702 |
| H  | 1.484502  | 0.054536  | -1.334087 |
| H  | 0.937668  | 1.020921  | 0.069146  |
| O  | -0.578137 | 0.235580  | -1.125796 |
| C  | -0.896231 | 1.521240  | -1.588900 |
| H  | -1.614040 | 1.403367  | -2.418505 |
| H  | -0.002334 | 2.010396  | -2.017441 |
| C  | -1.509984 | 2.407963  | -0.521347 |
| C  | -2.045454 | 3.647524  | -0.891392 |
| C  | -1.569990 | 2.008588  | 0.817924  |
| C  | -2.635638 | 4.477101  | 0.058568  |
| H  | -1.997905 | 3.964863  | -1.936766 |
| C  | -2.161906 | 2.844635  | 1.768631  |
| H  | -1.138517 | 1.051052  | 1.127214  |
| C  | -2.696787 | 4.075566  | 1.394634  |
| H  | -3.048705 | 5.441252  | -0.243220 |
| H  | -2.195256 | 2.528701  | 2.812862  |
| H  | -3.155845 | 4.725454  | 2.141454  |
| N  | -3.603094 | -1.702517 | -0.729435 |
| C  | -4.780131 | -2.609069 | -0.657904 |
| H  | -4.436612 | -3.647714 | -0.621894 |
| H  | -5.396966 | -2.453085 | -1.550853 |
| H  | -5.353051 | -2.368591 | 0.245062  |
| C  | -4.074873 | -0.291498 | -0.816409 |
| H  | -4.635306 | -0.051380 | 0.094366  |
| H  | -4.713819 | -0.184496 | -1.700694 |
| H  | -3.196106 | 0.358620  | -0.889231 |
| C  | -2.796105 | -2.010439 | -1.947043 |
| H  | -2.554451 | -3.078170 | -1.960691 |
| H  | -1.881502 | -1.403199 | -1.911038 |
| H  | -3.396793 | -1.757653 | -2.829232 |
| C  | -2.754901 | -1.815028 | 0.511410  |
| C  | -2.059885 | -3.156367 | 0.749171  |
| H  | -3.413233 | -1.592513 | 1.362332  |
| H  | -1.995204 | -1.024208 | 0.433784  |
| O  | -1.373490 | -3.085313 | 1.948490  |
| H  | -1.396617 | -3.394275 | -0.106191 |
| H  | -2.800238 | -3.971481 | 0.818247  |
| H  | -0.771047 | -2.283345 | 1.893831  |

**[P, Approximation: B Orientation: Downward]**

|    |           |           |           |
|----|-----------|-----------|-----------|
| C  | 0.833175  | -0.771810 | 0.716747  |
| C  | 2.225788  | -0.857231 | 1.383330  |
| O  | -0.107924 | -0.657770 | 1.681818  |
| H  | 2.470712  | 0.074177  | 1.913484  |
| H  | 2.185260  | -1.676875 | 2.113954  |
| S  | 3.612008  | -1.293540 | 0.291991  |
| C  | 4.340959  | 0.220925  | -0.122039 |
| Cl | 5.696526  | -0.092965 | -1.206182 |
| S  | 3.963064  | 1.724790  | 0.339794  |
| H  | 0.729747  | -1.704982 | 0.095281  |
| C  | 0.769309  | 0.389186  | -0.274732 |

|   |           |           |           |
|---|-----------|-----------|-----------|
| H | 1.603738  | 0.370277  | -1.001358 |
| H | 0.821399  | 1.334318  | 0.293742  |
| O | -0.460399 | 0.305976  | -0.981183 |
| C | -0.908435 | 1.521607  | -1.511404 |
| H | -1.528520 | 1.286999  | -2.394201 |
| H | -0.057770 | 2.123790  | -1.882480 |
| C | -1.731071 | 2.337999  | -0.531253 |
| C | -2.382757 | 3.492607  | -0.981506 |
| C | -1.865008 | 1.947762  | 0.806143  |
| C | -3.163300 | 4.250627  | -0.112186 |
| H | -2.276987 | 3.799749  | -2.025962 |
| C | -2.648896 | 2.714111  | 1.673856  |
| H | -1.339643 | 1.056332  | 1.174818  |
| C | -3.299887 | 3.860350  | 1.221744  |
| H | -3.666806 | 5.148708  | -0.474902 |
| H | -2.742992 | 2.409150  | 2.717934  |
| H | -3.909364 | 4.453414  | 1.905921  |
| N | -3.221041 | -2.046791 | -0.835578 |
| C | -4.221369 | -3.144427 | -0.854024 |
| H | -3.706012 | -4.101885 | -0.726140 |
| H | -4.745463 | -3.128902 | -1.817152 |
| H | -4.932117 | -2.987826 | -0.034142 |
| C | -3.909858 | -0.743208 | -1.042689 |
| H | -4.616309 | -0.583965 | -0.220016 |
| H | -4.438741 | -0.766000 | -2.003044 |
| H | -3.151250 | 0.048003  | -1.031197 |
| C | -2.235075 | -2.242506 | -1.938292 |
| H | -1.825247 | -3.255364 | -1.878099 |
| H | -1.439114 | -1.494980 | -1.818642 |
| H | -2.756320 | -2.111415 | -2.894097 |
| C | -2.516790 | -1.974599 | 0.497962  |
| C | -1.657382 | -3.177208 | 0.901942  |
| H | -3.297642 | -1.815032 | 1.254410  |
| H | -1.866289 | -1.088571 | 0.464332  |
| O | -1.051510 | -2.888863 | 2.100642  |
| H | -0.930425 | -3.397504 | 0.089458  |
| H | -2.290048 | -4.080311 | 1.008187  |
| H | -0.606360 | -1.923207 | 2.003678  |

## Nucleophilic attack to the Thiirane

### Solvated studies

Neutral reaction (using  $\text{N}(\text{CH}_3)_4^+$  as a counter cation):

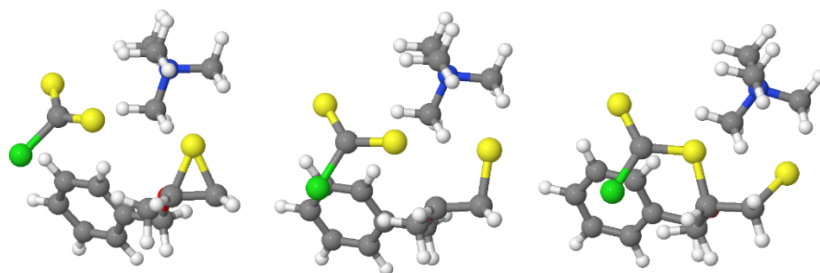

**Figure S35.** Reactant (left), transition state (center) and product (right) of the reaction between  $\text{CS}_2\text{Cl}^-$  +  $\text{N}(\text{CH}_3)_4^+$  and 4-R1i (upward attack to  $\text{C}_A$ ).

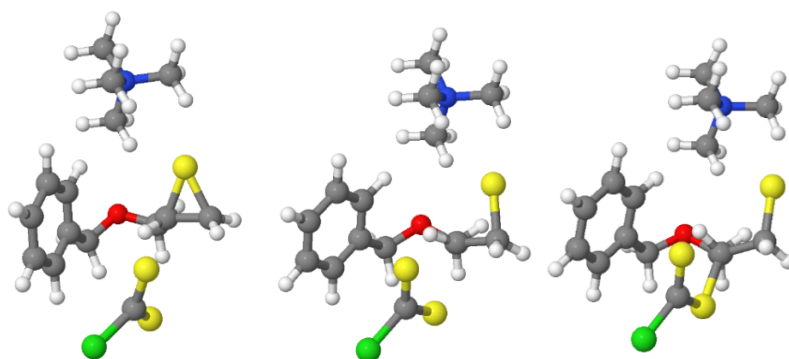

**Figure S36.** Reactant (left), transition state (center) and product (right) of the reaction between  $\text{CS}_2\text{Cl}^-$  +  $\text{N}(\text{CH}_3)_4^+$  and 4-R1i (downward attack to  $\text{C}_A$ ).

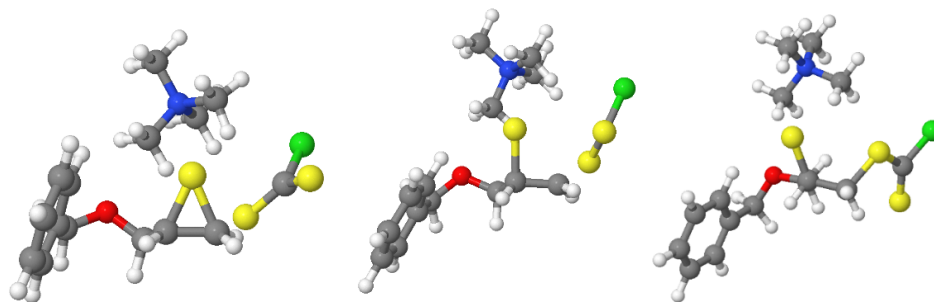

**Figure S37.** Reactant (left), transition state (center) and product (right) of the reaction between  $\text{CS}_2\text{Cl}^-$  +  $\text{N}(\text{CH}_3)_4^+$  and 4-R1i (upward attack to  $\text{C}_B$ ).

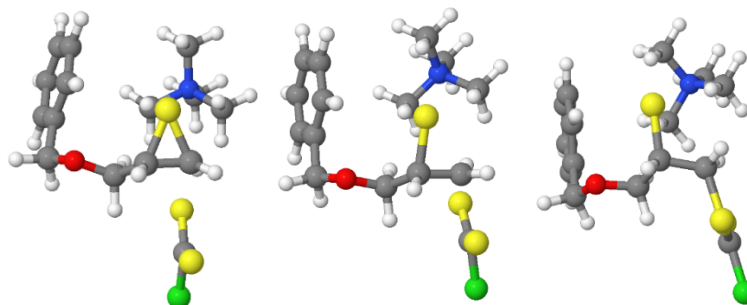

**Figure S38.** Reactant (left), transition state (center) and product (right) of the reaction between  $\text{CS}_2\text{Cl}^-$  +  $\text{N}(\text{CH}_3)_4^+$  and 4-R1i (downward attack to  $\text{C}_B$ ).

| Approximation | Orientation | R   | TS   | P    |
|---------------|-------------|-----|------|------|
| A             | upward      | 0.0 | 48.0 | 13.4 |
| A             | downward    | 0.0 | 19.5 | 2.7  |
| B             | upward      | 0.0 | 50.2 | 9.4  |
| B             | downward    | 0.0 | 23.4 | 11.6 |

**Table S23.** Energies of the reactants (R), transition state (TS) and products (P) involved in the solvated reaction between  $\text{CS}_2\text{Cl}^- + \text{N}(\text{CH}_3)_4^+$  and 4-R1i across various approximations and orientations. All energies are reported, relative to the reactant complex, as the Morokuma-corrected Gibbs free energies (373.15 K).

| Atom         | R     | TS    | P     |
|--------------|-------|-------|-------|
| $\text{C}_A$ | +0.01 | +0.03 | +0.01 |
| $\text{C}_B$ | -0.01 | +0.07 | +0.06 |
| $\text{S}'$  | +0.15 | +0.30 | +0.43 |
| S            | -0.10 | -0.46 | -0.62 |

**Table S24.** Atomic charges (in electrons) for the most relevant atoms involved in the reaction between  $\text{CS}_2\text{Cl}^- + \text{N}(\text{CH}_3)_4^+$  and 4-R1i (upward attack to  $\text{C}_A$ ). The results for the reactants (R), transition state (TS) and product (P) are shown.

| Atom         | R     | TS    | P  |
|--------------|-------|-------|----|
| $\text{C}_A$ | -0.04 | -0.03 | -- |
| $\text{C}_B$ | -0.01 | +0.06 | -- |
| $\text{S}'$  | +0.11 | +0.19 | -- |
| S            | -0.22 | -0.52 | -- |

**Table S25.** Atomic charges (in electrons) for the most relevant atoms involved in the reaction between  $\text{CS}_2\text{Cl}^- + \text{N}(\text{CH}_3)_4^+$  and 4-R1i (downward attack to  $\text{C}_A$ ). The results for the reactants (R), transition state (TS) and product (P) are shown.

| Atom         | R     | TS    | P     |
|--------------|-------|-------|-------|
| $\text{C}_A$ | -0.04 | +0.02 | +0.03 |
| $\text{C}_B$ | -0.02 | +0.03 | +0.01 |
| $\text{S}'$  | +0.25 | +0.41 | +0.42 |
| S            | -0.13 | -0.43 | -0.61 |

**Table S26.** Atomic charges (in electrons) for the most relevant atoms involved in the reaction between  $\text{CS}_2\text{Cl}^- + \text{N}(\text{CH}_3)_4^+$  and 4-R1i (upward attack to  $\text{C}_B$ ). The results for the reactants (R), transition state (TS) and product (P) are shown.

| Atom         | R     | TS    | P     |
|--------------|-------|-------|-------|
| $\text{C}_A$ | +0.00 | +0.05 | +0.05 |
| $\text{C}_B$ | -0.01 | +0.01 | +0.00 |
| $\text{S}'$  | +0.28 | +0.28 | +0.37 |
| S            | -0.14 | -0.47 | -0.61 |

**Table S27.** Atomic charges (in electrons) for the most relevant atoms involved in the reaction between  $\text{CS}_2\text{Cl}^- + \text{N}(\text{CH}_3)_4^+$  and 4-R1i (downward attack to  $\text{C}_B$ ). The results for the reactants (R), transition state (TS) and product (P) are shown.

| Atomic Pair        | R    | TS   | P    |
|--------------------|------|------|------|
| S-C <sub>A</sub>   | 1.02 | 0.33 | 0.08 |
| S-C <sub>B</sub>   | 1.05 | 1.05 | 1.15 |
| C <sub>A</sub> -S' | 0.02 | 0.42 | 0.95 |

**Table S28.** Delocalization Index (DI, in electron pairs) for the most relevant atomic pairs involved in the reaction between CS<sub>2</sub>Cl<sup>-</sup> + N(CH<sub>3</sub>)<sub>4</sub><sup>+</sup> and 4-R1i (upward attack to C<sub>A</sub>). The results for the reactants (R), transition state (TS) and product (P) are shown.

| Atomic Pair        | R    | TS   | P  |
|--------------------|------|------|----|
| S-C <sub>A</sub>   | 1.00 | 0.45 | -- |
| S-C <sub>B</sub>   | 1.03 | 1.06 | -- |
| C <sub>A</sub> -S' | 0.04 | 0.45 | -- |

**Table S29.** Delocalization Index (DI, in electron pairs) for the most relevant atomic pairs involved in the reaction between CS<sub>2</sub>Cl<sup>-</sup> + N(CH<sub>3</sub>)<sub>4</sub><sup>+</sup> and 4-R1i (downward attack to C<sub>A</sub>). The results for the reactants (R), transition state (TS) and product (P) are shown.

| Atomic Pair        | R    | TS   | P    |
|--------------------|------|------|------|
| S-C <sub>A</sub>   | 1.03 | 1.04 | 1.13 |
| S-C <sub>B</sub>   | 1.04 | 0.39 | 0.09 |
| C <sub>B</sub> -S' | 0.03 | 0.48 | 0.99 |

**Table S30.** Delocalization Index (DI, in electron pairs) for the most relevant atomic pairs involved in the reaction between CS<sub>2</sub>Cl<sup>-</sup> + N(CH<sub>3</sub>)<sub>4</sub><sup>+</sup> and 4-R1i (upward attack to C<sub>B</sub>). The results for the reactants (R), transition state (TS) and product (P) are shown.

| Atomic Pair        | R    | TS   | P    |
|--------------------|------|------|------|
| S-C <sub>A</sub>   | 1.02 | 1.05 | 1.12 |
| S-C <sub>B</sub>   | 1.05 | 0.48 | 0.11 |
| C <sub>B</sub> -S' | 0.01 | 0.50 | 0.98 |

**Table S31.** Delocalization Index (DI, in electron pairs) for the most relevant atomic pairs involved in the reaction between CS<sub>2</sub>Cl<sup>-</sup> + N(CH<sub>3</sub>)<sub>4</sub><sup>+</sup> and 4-R1i (downward attack to C<sub>B</sub>). The results for the reactants (R), transition state (TS) and product (P) are shown.

The upcoming section comprises the optimized geometries of the reactants (R), transition state (TS) and product (P) involved in the reaction across different approximations and orientations. All values are reported as XYZ Cartesian Coordinates in Angstroms.

**[R, Approximation: A Orientation: Upward]**

|    |           |           |           |
|----|-----------|-----------|-----------|
| C  | 2.427260  | 3.448845  | -0.947274 |
| C  | 1.465599  | 2.595405  | -1.677745 |
| S  | 2.875406  | 1.690228  | -0.981742 |
| H  | 3.080133  | 4.114635  | -1.517258 |
| H  | 1.489190  | 2.639672  | -2.770747 |
| S  | -0.510328 | -3.178684 | -0.438851 |
| C  | -0.362608 | -1.976760 | -1.591528 |
| S  | 0.926754  | -1.018115 | -2.003610 |
| Cl | -1.877555 | -1.669992 | -2.555655 |
| H  | 2.109879  | 3.817743  | 0.031444  |
| C  | 0.075250  | 2.374139  | -1.131320 |
| H  | -0.545122 | 3.238948  | -1.437571 |
| H  | -0.355642 | 1.467628  | -1.588843 |
| O  | 0.119558  | 2.283046  | 0.270341  |
| C  | -1.030827 | 2.700827  | 0.951644  |
| H  | -1.387931 | 3.667811  | 0.548216  |

|   |           |           |           |
|---|-----------|-----------|-----------|
| H | -0.719053 | 2.887821  | 1.992100  |
| C | -2.170378 | 1.702661  | 0.957019  |
| C | -2.027602 | 0.417747  | 0.430854  |
| C | -3.387573 | 2.065166  | 1.547939  |
| C | -3.079192 | -0.500031 | 0.505783  |
| H | -1.090680 | 0.132132  | -0.053011 |
| C | -4.436784 | 1.153479  | 1.622016  |
| H | -3.510105 | 3.072110  | 1.956622  |
| C | -4.282964 | -0.134970 | 1.103493  |
| H | -2.939374 | -1.497931 | 0.085140  |
| H | -5.380383 | 1.447851  | 2.085320  |
| H | -5.105039 | -0.850345 | 1.160747  |
| C | 1.005530  | -0.499359 | 1.561926  |
| H | 0.329352  | -1.155199 | 0.999359  |
| H | 0.511399  | -0.122549 | 2.466613  |
| N | 2.180796  | -1.324279 | 1.982327  |
| C | 2.873584  | -1.848490 | 0.768934  |
| H | 3.730200  | -2.451560 | 1.093363  |
| H | 2.153053  | -2.444039 | 0.193993  |
| H | 3.197223  | -0.996261 | 0.161532  |
| C | 3.117307  | -0.483169 | 2.769668  |
| H | 3.428883  | 0.360808  | 2.142897  |
| H | 2.598489  | -0.117277 | 3.663415  |
| H | 3.986495  | -1.086833 | 3.056582  |
| C | 1.702210  | -2.471238 | 2.799547  |
| H | 1.020262  | -3.065200 | 2.178287  |
| H | 2.565636  | -3.073699 | 3.106058  |
| H | 1.176311  | -2.083326 | 3.679622  |
| H | 1.351025  | 0.332144  | 0.934745  |

**[TS, Approximation: A Orientation: Upward]**

|    |           |           |           |
|----|-----------|-----------|-----------|
| C  | -1.701189 | -3.310870 | 0.074860  |
| C  | -0.656809 | -2.667322 | -0.718757 |
| S  | -2.999714 | -1.998087 | 0.089222  |
| H  | -2.086274 | -4.220343 | -0.405015 |
| H  | -0.537672 | -2.966147 | -1.760681 |
| S  | 0.233106  | 2.246319  | -2.145093 |
| C  | 0.186982  | 0.592615  | -2.216436 |
| S  | -1.105173 | -0.400584 | -1.787917 |
| Cl | 1.666096  | -0.247454 | -2.798123 |
| H  | -1.358186 | -3.521465 | 1.096412  |
| C  | 0.607741  | -2.278439 | -0.031000 |
| H  | 1.120969  | -3.252125 | 0.153879  |
| H  | 1.266763  | -1.684185 | -0.680801 |
| O  | 0.340377  | -1.644028 | 1.187606  |
| C  | 1.449299  | -1.528860 | 2.040623  |
| H  | 1.927907  | -2.515448 | 2.190049  |
| H  | 1.046161  | -1.216493 | 3.016878  |
| C  | 2.485381  | -0.526922 | 1.573765  |
| C  | 2.158356  | 0.441866  | 0.623305  |
| C  | 3.778915  | -0.547078 | 2.106055  |
| C  | 3.106787  | 1.371592  | 0.197544  |
| H  | 1.154680  | 0.445338  | 0.194254  |
| C  | 4.723509  | 0.392998  | 1.697982  |
| H  | 4.049666  | -1.307853 | 2.843037  |
| C  | 4.391017  | 1.352547  | 0.739232  |
| H  | 2.830263  | 2.095195  | -0.572685 |
| H  | 5.729831  | 0.368850  | 2.120082  |
| H  | 5.137053  | 2.076941  | 0.408355  |
| C  | -1.267102 | 1.131034  | 1.251782  |
| H  | -0.674741 | 1.631220  | 0.473487  |
| H  | -0.810321 | 1.274221  | 2.239629  |

|   |           |           |           |
|---|-----------|-----------|-----------|
| N | -2.621180 | 1.766439  | 1.270372  |
| C | -3.236148 | 1.658499  | -0.086188 |
| H | -4.206748 | 2.168564  | -0.064305 |
| H | -2.556340 | 2.123428  | -0.811587 |
| H | -3.344397 | 0.594452  | -0.328509 |
| C | -3.475817 | 1.052900  | 2.258323  |
| H | -3.513461 | -0.006319 | 1.967881  |
| H | -3.025059 | 1.160769  | 3.252172  |
| H | -4.477767 | 1.498290  | 2.246422  |
| C | -2.493008 | 3.199115  | 1.639057  |
| H | -1.855328 | 3.692820  | 0.896117  |
| H | -3.489965 | 3.655218  | 1.644655  |
| H | -2.037710 | 3.271050  | 2.633634  |
| H | -1.386705 | 0.063476  | 1.021026  |

**[P, Approximation: A Orientation: Upward]**

|    |           |           |           |
|----|-----------|-----------|-----------|
| C  | 1.605087  | -2.151656 | -2.121115 |
| C  | 0.273194  | -1.914062 | -1.396274 |
| S  | 2.942448  | -0.957764 | -1.798369 |
| H  | 1.941799  | -3.165667 | -1.848597 |
| H  | -0.305640 | -2.849647 | -1.395036 |
| S  | -0.721955 | -1.435745 | 2.899075  |
| C  | -0.697552 | -1.838730 | 1.318389  |
| S  | 0.710722  | -1.559924 | 0.357818  |
| Cl | -2.094871 | -2.598768 | 0.574508  |
| H  | 1.358872  | -2.190601 | -3.196980 |
| C  | -0.636317 | -0.839876 | -1.981551 |
| H  | -0.697776 | -1.017717 | -3.073315 |
| H  | -1.654013 | -0.967364 | -1.571417 |
| O  | -0.177505 | 0.462073  | -1.727601 |
| C  | -1.109340 | 1.452478  | -2.063101 |
| H  | -1.505636 | 1.296217  | -3.084091 |
| H  | -0.555414 | 2.404941  | -2.080140 |
| C  | -2.260262 | 1.550554  | -1.079637 |
| C  | -2.100814 | 1.099582  | 0.233981  |
| C  | -3.486140 | 2.101925  | -1.463060 |
| C  | -3.150263 | 1.187123  | 1.147624  |
| H  | -1.145009 | 0.659095  | 0.525508  |
| C  | -4.531604 | 2.207927  | -0.546123 |
| H  | -3.626024 | 2.445545  | -2.491272 |
| C  | -4.368027 | 1.746456  | 0.760619  |
| H  | -3.014884 | 0.805145  | 2.161653  |
| H  | -5.484436 | 2.639723  | -0.857609 |
| H  | -5.191640 | 1.815040  | 1.473162  |
| C  | 1.719008  | 1.759075  | 0.325626  |
| H  | 0.996491  | 1.513515  | 1.113897  |
| H  | 1.535107  | 2.771275  | -0.056456 |
| N  | 3.089853  | 1.732760  | 0.922425  |
| C  | 3.363533  | 0.368361  | 1.467866  |
| H  | 4.357516  | 0.378296  | 1.931662  |
| H  | 2.594488  | 0.134150  | 2.213838  |
| H  | 3.320339  | -0.342907 | 0.624469  |
| C  | 4.077401  | 2.035836  | -0.152369 |
| H  | 3.914785  | 1.319153  | -0.968482 |
| H  | 3.905690  | 3.060100  | -0.504094 |
| H  | 5.088589  | 1.939244  | 0.259830  |
| C  | 3.192181  | 2.737672  | 2.009077  |
| H  | 2.468918  | 2.482852  | 2.792408  |
| H  | 4.209809  | 2.719322  | 2.416789  |
| H  | 2.967994  | 3.729676  | 1.599546  |
| H  | 1.683994  | 1.012724  | -0.484146 |

**[R, Approximation: A Orientation: Downward]**

|    |           |           |           |
|----|-----------|-----------|-----------|
| C  | 0.033701  | -2.569043 | -0.951554 |
| C  | 0.056947  | -1.414934 | -0.041565 |
| S  | -1.122837 | -1.237869 | -1.418881 |
| H  | 0.895661  | -2.676454 | -1.615509 |
| H  | 0.923827  | -0.759947 | -0.159400 |
| S  | 3.098146  | -0.784389 | -1.757734 |
| C  | 3.632433  | -0.725359 | -0.191859 |
| S  | 3.222093  | -1.600571 | 1.161315  |
| Cl | 4.921141  | 0.569599  | 0.116694  |
| H  | -0.438895 | -3.494938 | -0.610410 |
| C  | -0.487223 | -1.574816 | 1.353960  |
| H  | -1.326982 | -2.287968 | 1.342496  |
| H  | 0.325530  | -1.999678 | 1.972739  |
| O  | -0.972520 | -0.392773 | 1.942892  |
| C  | 0.020447  | 0.567536  | 2.247826  |
| H  | 0.942592  | 0.067995  | 2.594078  |
| H  | -0.377966 | 1.159783  | 3.087023  |
| C  | 0.348255  | 1.477528  | 1.084399  |
| C  | -0.680947 | 2.019391  | 0.305796  |
| C  | 1.673078  | 1.762371  | 0.751142  |
| C  | -0.389413 | 2.827101  | -0.790515 |
| H  | -1.717838 | 1.788495  | 0.562203  |
| C  | 1.969111  | 2.559224  | -0.355917 |
| H  | 2.487245  | 1.318957  | 1.329420  |
| C  | 0.939626  | 3.094333  | -1.127199 |
| H  | -1.198013 | 3.243565  | -1.395573 |
| H  | 3.013523  | 2.725567  | -0.624715 |
| H  | 1.170705  | 3.708350  | -1.999214 |
| C  | -4.181683 | 0.958971  | -1.050006 |
| H  | -4.768901 | 0.950738  | -1.975480 |
| H  | -3.154671 | 0.630039  | -1.248749 |
| N  | -4.804984 | 0.011939  | -0.080246 |
| C  | -4.802263 | -1.363318 | -0.658465 |
| H  | -3.760104 | -1.659997 | -0.835213 |
| H  | -5.281114 | -2.041132 | 0.057299  |
| H  | -5.362928 | -1.348323 | -1.600353 |
| C  | -6.204883 | 0.432237  | 0.198656  |
| H  | -6.771646 | 0.414689  | -0.739257 |
| H  | -6.644248 | -0.266604 | 0.919394  |
| H  | -6.193655 | 1.446080  | 0.614987  |
| C  | -4.011901 | 0.015005  | 1.184398  |
| H  | -2.968443 | -0.242154 | 0.960824  |
| H  | -4.059550 | 1.019483  | 1.621724  |
| H  | -4.447441 | -0.715837 | 1.875460  |
| H  | -4.181188 | 1.962614  | -0.608766 |

**[TS, Approximation: A Orientation: Downward]**

|    |           |           |           |
|----|-----------|-----------|-----------|
| C  | -0.113916 | -2.783673 | -0.484713 |
| C  | 0.122137  | -1.562916 | 0.279764  |
| S  | -1.717764 | -2.068497 | -0.998045 |
| H  | 0.582860  | -2.911468 | -1.320787 |
| H  | 0.384601  | -0.678519 | -0.299635 |
| S  | 2.444349  | -0.485187 | -1.904785 |
| C  | 3.098075  | -0.785278 | -0.432674 |
| S  | 2.464443  | -1.634289 | 0.885994  |
| Cl | 4.747632  | -0.132849 | -0.108568 |
| H  | -0.207249 | -3.698048 | 0.115892  |
| C  | -0.437671 | -1.415866 | 1.681820  |
| H  | -1.353155 | -2.018770 | 1.752583  |
| H  | 0.283430  | -1.818301 | 2.416473  |
| O  | -0.787667 | -0.100090 | 2.031851  |



|   |           |           |           |
|---|-----------|-----------|-----------|
| C | 0.288382  | 0.770947  | 2.295107  |
| H | 1.134884  | 0.219621  | 2.740901  |
| H | -0.073321 | 1.486200  | 3.052886  |
| C | 0.773396  | 1.544330  | 1.085975  |
| C | -0.085963 | 1.822093  | 0.019334  |
| C | 2.088219  | 2.015807  | 1.036267  |
| C | 0.356367  | 2.567497  | -1.072781 |
| H | -1.097490 | 1.412394  | 0.038725  |
| C | 2.532229  | 2.762311  | -0.053737 |
| H | 2.782476  | 1.765751  | 1.842589  |
| C | 1.665690  | 3.045224  | -1.109080 |
| H | -0.318724 | 2.761897  | -1.908768 |
| H | 3.568797  | 3.101013  | -0.090936 |
| H | 2.018867  | 3.614911  | -1.970106 |
| C | -3.774460 | 0.874326  | -1.394634 |
| H | -4.455024 | 0.875244  | -2.254417 |
| H | -2.944972 | 0.171719  | -1.555489 |
| N | -4.538388 | 0.443938  | -0.186133 |
| C | -5.072631 | -0.933704 | -0.394544 |
| H | -4.224317 | -1.625870 | -0.483013 |
| H | -5.688138 | -1.199326 | 0.472800  |
| H | -5.679061 | -0.940559 | -1.307369 |
| C | -5.662529 | 1.385037  | 0.056909  |
| H | -6.342379 | 1.355133  | -0.802818 |
| H | -6.190568 | 1.077543  | 0.966698  |
| H | -5.255757 | 2.395210  | 0.181178  |
| C | -3.616177 | 0.433088  | 0.988511  |
| H | -2.764855 | -0.215805 | 0.748133  |
| H | -3.274660 | 1.457688  | 1.176559  |
| H | -4.160876 | 0.050923  | 1.859776  |
| H | -3.388411 | 1.885245  | -1.217856 |

**[P, Approximation: A Orientation: Downward]**

|    |           |           |           |
|----|-----------|-----------|-----------|
| C  | -0.518440 | -2.601363 | 0.075228  |
| C  | 0.092232  | -1.287887 | 0.572538  |
| S  | -2.236956 | -2.415991 | -0.501748 |
| H  | 0.120288  | -2.969618 | -0.743566 |
| H  | 0.048064  | -0.541954 | -0.234297 |
| S  | 2.061203  | -0.739960 | -1.960766 |
| C  | 2.680161  | -1.112862 | -0.517619 |
| S  | 1.881208  | -1.513088 | 0.965547  |
| Cl | 4.425165  | -1.172680 | -0.246913 |
| H  | -0.451785 | -3.349509 | 0.885638  |
| C  | -0.598682 | -0.738223 | 1.822821  |
| H  | -1.642682 | -1.077302 | 1.767429  |
| H  | -0.151977 | -1.167549 | 2.741352  |
| O  | -0.642369 | 0.667121  | 1.917079  |
| C  | 0.570618  | 1.319221  | 2.203255  |
| H  | 1.228381  | 0.676524  | 2.815366  |
| H  | 0.314277  | 2.196570  | 2.821141  |
| C  | 1.321343  | 1.800205  | 0.977563  |
| C  | 0.628997  | 2.204239  | -0.166810 |
| C  | 2.717152  | 1.889254  | 0.989184  |
| C  | 1.316328  | 2.704123  | -1.272919 |
| H  | -0.458030 | 2.111717  | -0.186999 |
| C  | 3.406868  | 2.383782  | -0.116534 |
| H  | 3.271466  | 1.544994  | 1.866337  |
| C  | 2.706971  | 2.797896  | -1.250174 |
| H  | 0.763469  | 3.010571  | -2.162915 |
| H  | 4.497031  | 2.431950  | -0.098403 |
| H  | 3.246551  | 3.176984  | -2.119510 |
| C  | -4.275212 | 0.244802  | -1.755519 |

|   |           |           |           |
|---|-----------|-----------|-----------|
| H | -5.227025 | -0.070587 | -2.199232 |
| H | -3.539762 | -0.574983 | -1.757571 |
| N | -4.521980 | 0.637354  | -0.335933 |
| C | -5.088314 | -0.525369 | 0.409067  |
| H | -4.336823 | -1.330905 | 0.404248  |
| H | -5.302638 | -0.203325 | 1.434933  |
| H | -6.012037 | -0.841578 | -0.089770 |
| C | -5.469904 | 1.777555  | -0.283736 |
| H | -6.424717 | 1.465352  | -0.722943 |
| H | -5.614733 | 2.069191  | 0.763008  |
| H | -5.049125 | 2.614557  | -0.852947 |
| C | -3.217343 | 1.019461  | 0.286848  |
| H | -2.541212 | 0.161038  | 0.162908  |
| H | -2.836666 | 1.907577  | -0.230028 |
| H | -3.380025 | 1.235655  | 1.349062  |
| H | -3.879220 | 1.117351  | -2.288512 |

**[R, Approximation: B Orientation: Upward]**

|    |           |           |           |
|----|-----------|-----------|-----------|
| C  | 1.555047  | -1.393331 | 0.242914  |
| C  | 0.507829  | -2.361972 | -0.152646 |
| S  | 0.644943  | -0.933350 | -1.259625 |
| H  | -0.424459 | -2.387743 | 0.422666  |
| S  | -3.001781 | -2.414759 | -0.996754 |
| C  | -3.361513 | -1.401543 | 0.246699  |
| Cl | -4.938105 | -0.438116 | 0.028591  |
| S  | -2.560654 | -1.049641 | 1.670649  |
| H  | 2.593947  | -1.676408 | 0.049102  |
| C  | 1.301173  | -0.534888 | 1.461876  |
| H  | 1.785716  | -1.001966 | 2.340703  |
| H  | 0.215651  | -0.524297 | 1.644029  |
| O  | 1.714498  | 0.808088  | 1.342209  |
| C  | 3.057187  | 1.061380  | 1.673862  |
| H  | 3.296864  | 0.638114  | 2.666633  |
| H  | 3.143670  | 2.156168  | 1.754459  |
| C  | 4.047334  | 0.546922  | 0.651207  |
| C  | 5.158889  | -0.205059 | 1.035747  |
| C  | 3.838913  | 0.805680  | -0.708744 |
| C  | 6.053357  | -0.689854 | 0.079000  |
| H  | 5.322616  | -0.422354 | 2.094190  |
| C  | 4.723637  | 0.317386  | -1.665655 |
| H  | 2.958265  | 1.375658  | -1.013108 |
| C  | 5.834898  | -0.432734 | -1.272819 |
| H  | 6.917193  | -1.279038 | 0.391542  |
| H  | 4.544803  | 0.515318  | -2.723892 |
| H  | 6.527347  | -0.818875 | -2.022633 |
| H  | 0.820217  | -3.313764 | -0.589049 |
| C  | -0.708674 | 2.135558  | 0.343149  |
| H  | -0.498925 | 2.965152  | 1.028332  |
| H  | 0.101077  | 2.014161  | -0.383422 |
| N  | -1.981222 | 2.420776  | -0.383720 |
| C  | -1.885244 | 3.725871  | -1.085720 |
| H  | -2.809350 | 3.888604  | -1.652767 |
| H  | -1.754317 | 4.520539  | -0.342090 |
| H  | -1.025697 | 3.698240  | -1.765246 |
| C  | -3.103869 | 2.463134  | 0.597807  |
| H  | -2.884493 | 3.243914  | 1.335848  |
| H  | -4.030532 | 2.692955  | 0.060116  |
| H  | -3.182903 | 1.480841  | 1.082703  |
| C  | -2.218386 | 1.332228  | -1.379827 |
| H  | -1.489358 | 1.445133  | -2.190675 |
| H  | -2.064809 | 0.365238  | -0.888432 |
| H  | -3.242452 | 1.415221  | -1.760820 |

H -0.843326 1.198360 0.894729

**[TS, Approximation: B Orientation: Upward]**

C 1.108464 -1.291141 -0.089301  
C 0.118144 -2.361832 -0.026177  
S 0.378947 -0.499696 -1.582904  
H -0.428692 -2.513231 0.909117  
S -2.178079 -2.286170 -0.873965  
C -3.032109 -1.555052 0.353475  
Cl -4.658114 -0.938388 -0.196703  
S -2.630422 -1.257069 1.933491  
H 2.104371 -1.679022 -0.353029  
C 1.139561 -0.439883 1.175330  
H 1.724620 -0.968376 1.951906  
H 0.106116 -0.359299 1.550612  
O 1.637759 0.867003 1.002495  
C 2.933082 1.105348 1.478670  
H 3.043352 0.744477 2.518737  
H 3.046647 2.201341 1.508769  
C 4.037811 0.520889 0.622680  
C 5.281564 0.223350 1.188517  
C 3.843983 0.315995 -0.747030  
C 6.322033 -0.263586 0.398140  
H 5.436374 0.371576 2.260599  
C 4.881737 -0.182223 -1.535044  
H 2.862659 0.519600 -1.187526  
C 6.123697 -0.468534 -0.967481  
H 7.287833 -0.493239 0.851958  
H 4.713844 -0.350972 -2.600449  
H 6.934099 -0.857592 -1.586393  
H 0.307233 -3.258113 -0.619633  
C -1.007272 2.080984 0.428546  
H -0.823922 2.801391 1.234767  
H -0.169537 2.034475 -0.274488  
N -2.251437 2.485968 -0.294113  
C -2.128079 3.894288 -0.751956  
H -3.021517 4.158874 -1.329589  
H -2.038842 4.545602 0.125122  
H -1.232939 3.980415 -1.378443  
C -3.414120 2.357182 0.628123  
H -3.244192 3.009288 1.493004  
H -4.323327 2.659171 0.095080  
H -3.493515 1.311851 0.952926  
C -2.448633 1.598126 -1.477942  
H -1.632492 1.780532 -2.185252  
H -2.402167 0.551291 -1.157936  
H -3.421020 1.831385 -1.927863  
H -1.175365 1.076879 0.833529

**[P, Approximation: B Orientation: Upward]**

C 0.618974 -0.758946 -0.842600  
C -0.291671 -1.891550 -1.320083  
S 0.348936 0.747178 -1.841572  
H -0.218763 -2.816892 -0.727858  
S -2.051273 -1.408326 -1.371919  
C -2.735681 -2.096479 0.052631  
Cl -4.445520 -1.618747 0.111755  
S -2.092036 -3.003359 1.232133  
H 1.644404 -1.130166 -1.017645  
C 0.449790 -0.559144 0.664222  
H 0.594761 -1.521886 1.192026  
H -0.589808 -0.237454 0.858233

|   |           |           |           |
|---|-----------|-----------|-----------|
| O | 1.290171  | 0.417015  | 1.238381  |
| C | 2.484624  | -0.032938 | 1.811620  |
| H | 2.332432  | -1.005729 | 2.316302  |
| H | 2.742215  | 0.693638  | 2.600927  |
| C | 3.662604  | -0.137967 | 0.862959  |
| C | 4.802995  | -0.845120 | 1.261156  |
| C | 3.655189  | 0.503815  | -0.378129 |
| C | 5.923652  | -0.907969 | 0.435181  |
| H | 4.812149  | -1.354440 | 2.228910  |
| C | 4.774855  | 0.429954  | -1.208884 |
| H | 2.752293  | 1.025499  | -0.711906 |
| C | 5.912095  | -0.268725 | -0.805665 |
| H | 6.806130  | -1.464308 | 0.756854  |
| H | 4.749926  | 0.920828  | -2.183783 |
| H | 6.785513  | -0.322555 | -1.458063 |
| H | -0.063509 | -2.113461 | -2.370583 |
| C | -0.652202 | 2.714454  | 1.080591  |
| H | -0.158708 | 3.645069  | 1.386275  |
| H | -0.019238 | 2.138799  | 0.388355  |
| N | -1.915185 | 3.067006  | 0.363053  |
| C | -1.560361 | 3.823893  | -0.871106 |
| H | -2.481788 | 4.061352  | -1.415475 |
| H | -1.039757 | 4.743844  | -0.580377 |
| H | -0.903996 | 3.180209  | -1.471977 |
| C | -2.792692 | 3.885925  | 1.234523  |
| H | -2.262049 | 4.804927  | 1.510138  |
| H | -3.710519 | 4.129587  | 0.686390  |
| H | -3.034273 | 3.307470  | 2.133817  |
| C | -2.611931 | 1.806524  | -0.034457 |
| H | -1.926021 | 1.255003  | -0.698400 |
| H | -2.835809 | 1.231259  | 0.872966  |
| H | -3.541972 | 2.069510  | -0.553408 |
| H | -0.906301 | 2.111198  | 1.960020  |

**[R, Approximation: B Orientation: Downward]**

|    |           |           |           |
|----|-----------|-----------|-----------|
| C  | 1.694369  | -2.236776 | 1.477219  |
| C  | 2.355300  | -1.060055 | 2.072646  |
| S  | 0.822905  | -1.553228 | 2.922468  |
| H  | 2.314718  | -0.113231 | 1.521089  |
| H  | 3.273930  | -1.216020 | 2.643046  |
| S  | 3.704424  | -0.192689 | -1.426641 |
| C  | 2.530291  | 0.912286  | -1.123727 |
| Cl | 0.926922  | 0.627711  | -2.056481 |
| S  | 2.515378  | 2.259890  | -0.138948 |
| H  | 2.146193  | -3.216334 | 1.661272  |
| C  | 1.045826  | -2.078961 | 0.136067  |
| H  | 1.824867  | -2.104442 | -0.649591 |
| H  | 0.569371  | -1.082801 | 0.079086  |
| O  | 0.109941  | -3.104528 | -0.080146 |
| C  | -0.650576 | -2.879543 | -1.234640 |
| H  | -1.036417 | -3.859015 | -1.559776 |
| H  | -0.024306 | -2.480329 | -2.053214 |
| C  | -1.820726 | -1.949495 | -0.987370 |
| C  | -2.258457 | -1.057169 | -1.970446 |
| C  | -2.508351 | -2.014169 | 0.230396  |
| C  | -3.390156 | -0.267414 | -1.756322 |
| H  | -1.709962 | -0.983451 | -2.912645 |
| C  | -3.638101 | -1.226809 | 0.446981  |
| H  | -2.142847 | -2.692121 | 1.003900  |
| C  | -4.088631 | -0.359018 | -0.550715 |
| H  | -3.731889 | 0.414400  | -2.537843 |
| H  | -4.176052 | -1.297449 | 1.394451  |

|   |           |          |           |
|---|-----------|----------|-----------|
| H | -4.986105 | 0.242112 | -0.390485 |
| N | -1.337137 | 2.552321 | 0.821530  |
| C | -1.127214 | 3.023134 | -0.578927 |
| H | -1.690357 | 2.363895 | -1.250936 |
| H | -0.054659 | 2.960737 | -0.804416 |
| H | -1.490694 | 4.054912 | -0.654043 |
| C | -0.551245 | 3.407937 | 1.753375  |
| H | -0.899114 | 4.443229 | 1.658303  |
| H | 0.506634  | 3.328687 | 1.476365  |
| H | -0.706714 | 3.045805 | 2.776137  |
| C | -0.866588 | 1.137304 | 0.940670  |
| H | -1.414222 | 0.525270 | 0.213261  |
| H | -1.053722 | 0.783490 | 1.961388  |
| H | 0.208261  | 1.126270 | 0.717954  |
| C | -2.779847 | 2.630994 | 1.163586  |
| H | -3.108036 | 3.674093 | 1.083880  |
| H | -2.919123 | 2.265946 | 2.187892  |
| H | -3.335654 | 1.998196 | 0.462736  |

**[TS, Approximation: B Orientation: Downward]**

|    |           |           |           |
|----|-----------|-----------|-----------|
| C  | 0.861089  | -1.162162 | 1.887062  |
| C  | 1.688829  | 0.046148  | 1.903835  |
| S  | -0.434392 | -0.153360 | 2.701393  |
| H  | 1.506943  | 0.814483  | 1.152242  |
| H  | 2.167356  | 0.339607  | 2.835974  |
| S  | 3.744124  | -0.467581 | 0.900555  |
| C  | 3.575536  | 0.179695  | -0.646188 |
| Cl | 4.981570  | -0.178669 | -1.695949 |
| S  | 2.361204  | 1.070369  | -1.324885 |
| H  | 1.223712  | -1.957411 | 2.552013  |
| C  | 0.533660  | -1.713093 | 0.520827  |
| H  | 1.463389  | -2.084574 | 0.045028  |
| H  | 0.141679  | -0.903758 | -0.119531 |
| O  | -0.392673 | -2.763387 | 0.643036  |
| C  | -1.096251 | -3.025006 | -0.535355 |
| H  | -1.470909 | -4.058553 | -0.457775 |
| H  | -0.432822 | -2.990035 | -1.419854 |
| C  | -2.278538 | -2.095737 | -0.735436 |
| C  | -2.747129 | -1.785375 | -2.015999 |
| C  | -2.953510 | -1.586575 | 0.380071  |
| C  | -3.890279 | -1.001464 | -2.183485 |
| H  | -2.217372 | -2.169227 | -2.891729 |
| C  | -4.095170 | -0.803227 | 0.213666  |
| H  | -2.554697 | -1.793558 | 1.374852  |
| C  | -4.571656 | -0.513198 | -1.067244 |
| H  | -4.251547 | -0.775856 | -3.188638 |
| H  | -4.620838 | -0.422984 | 1.092347  |
| H  | -5.474428 | 0.087518  | -1.195945 |
| N  | -1.581261 | 2.675193  | 0.020154  |
| C  | -1.904877 | 3.674355  | -1.029491 |
| H  | -2.809854 | 3.351419  | -1.556992 |
| H  | -1.062347 | 3.732139  | -1.728364 |
| H  | -2.069134 | 4.648900  | -0.554737 |
| C  | -0.342901 | 3.083051  | 0.746207  |
| H  | -0.498565 | 4.082496  | 1.169258  |
| H  | 0.492816  | 3.088073  | 0.035789  |
| H  | -0.160554 | 2.344686  | 1.539096  |
| C  | -1.364292 | 1.333568  | -0.600876 |
| H  | -2.280406 | 1.036843  | -1.127219 |
| H  | -1.146125 | 0.634479  | 0.218129  |
| H  | -0.516957 | 1.398645  | -1.293599 |
| C  | -2.705286 | 2.569567  | 0.992197  |

|   |           |          |          |
|---|-----------|----------|----------|
| H | -2.842137 | 3.541608 | 1.480562 |
| H | -2.442629 | 1.797133 | 1.726725 |
| H | -3.611377 | 2.281903 | 0.446383 |

**[P, Approximation: B Orientation: Downward]**

|    |           |           |           |
|----|-----------|-----------|-----------|
| C  | 0.984373  | -0.399071 | 1.883281  |
| C  | 2.007268  | 0.675407  | 1.515280  |
| S  | -0.483563 | 0.471836  | 2.544254  |
| H  | 1.642295  | 1.321429  | 0.705113  |
| H  | 2.209806  | 1.296303  | 2.396861  |
| S  | 3.664634  | 0.069201  | 1.002591  |
| C  | 3.628461  | 0.127539  | -0.723334 |
| Cl | 5.168637  | -0.457972 | -1.342539 |
| S  | 2.461542  | 0.621943  | -1.738260 |
| H  | 1.417591  | -1.034993 | 2.674988  |
| C  | 0.689991  | -1.313392 | 0.703360  |
| H  | 1.633932  | -1.681566 | 0.248508  |
| H  | 0.155811  | -0.747186 | -0.080419 |
| O  | -0.066547 | -2.421301 | 1.123407  |
| C  | -0.747720 | -3.049786 | 0.080462  |
| H  | -0.991066 | -4.067135 | 0.428156  |
| H  | -0.105935 | -3.162345 | -0.814926 |
| C  | -2.038208 | -2.345080 | -0.293906 |
| C  | -2.545795 | -2.400323 | -1.595481 |
| C  | -2.763949 | -1.671523 | 0.696051  |
| C  | -3.776459 | -1.816643 | -1.903922 |
| H  | -1.976300 | -2.912781 | -2.375444 |
| C  | -3.995953 | -1.094774 | 0.389102  |
| H  | -2.326002 | -1.570770 | 1.691413  |
| C  | -4.509515 | -1.168994 | -0.908253 |
| H  | -4.165578 | -1.874278 | -2.922341 |
| H  | -4.560749 | -0.584799 | 1.172820  |
| H  | -5.479985 | -0.726490 | -1.142962 |
| N  | -2.019408 | 2.591982  | -0.386446 |
| C  | -2.550872 | 3.400448  | -1.510961 |
| H  | -3.380914 | 2.856461  | -1.976925 |
| H  | -1.748286 | 3.557544  | -2.241038 |
| H  | -2.900282 | 4.364400  | -1.122613 |
| C  | -0.864405 | 3.292524  | 0.249461  |
| H  | -1.201674 | 4.278689  | 0.590891  |
| H  | -0.070824 | 3.400515  | -0.500344 |
| H  | -0.524907 | 2.669667  | 1.094352  |
| C  | -1.564460 | 1.255162  | -0.874782 |
| H  | -2.419250 | 0.732263  | -1.323633 |
| H  | -1.195919 | 0.712865  | 0.009647  |
| H  | -0.767808 | 1.405176  | -1.613671 |
| C  | -3.079742 | 2.376161  | 0.640051  |
| H  | -3.367260 | 3.348118  | 1.058099  |
| H  | -2.657668 | 1.720343  | 1.414880  |
| H  | -3.937510 | 1.897017  | 0.153804  |

Neutral reaction (using Choline as a counter cation):

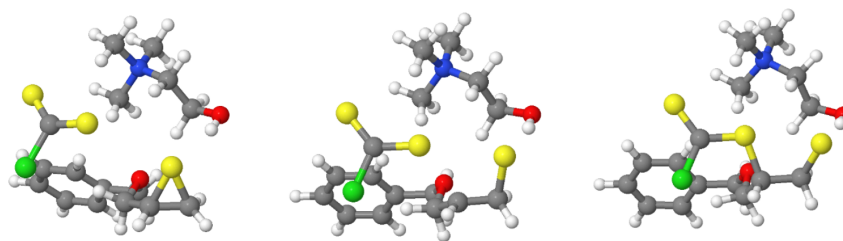

**Figure S39.** Reactant (left), transition state (center) and product (right) of the reaction between  $\text{CS}_2\text{Cl}^-$  + Choline and 4-R1i (upward attack to  $\text{C}_A$ ).

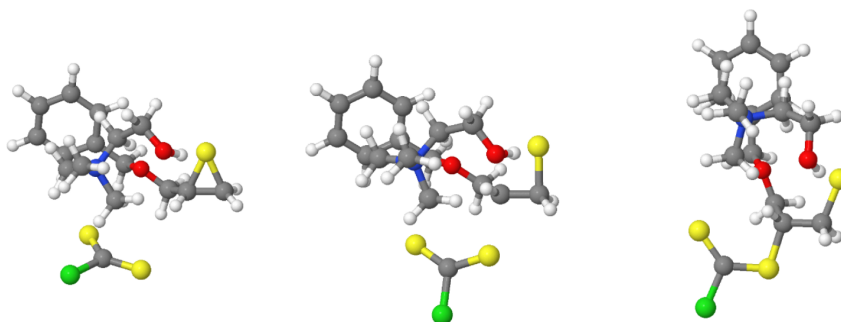

**Figure S40.** Reactant (left), transition state (center) and product (right) of the reaction between  $\text{CS}_2\text{Cl}^-$  + Choline and 4-R1i (downward attack to  $\text{C}_A$ ).

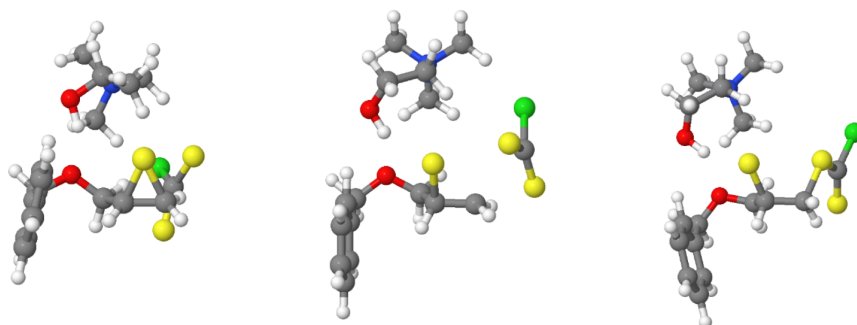

**Figure S41.** Reactant (left), transition state (center) and product (right) of the reaction between  $\text{CS}_2\text{Cl}^-$  + Choline and 4-R1i (upward attack to  $\text{C}_B$ ).

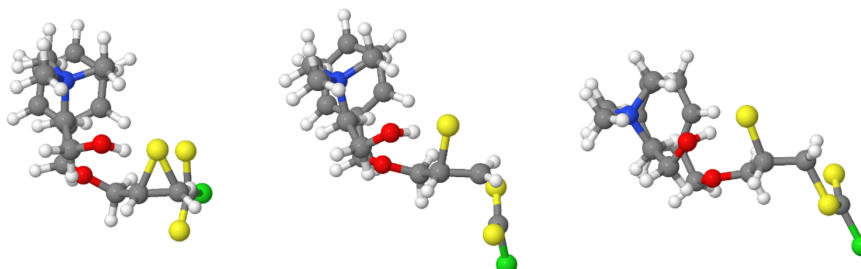

**Figure S42.** Reactant (left), transition state (center) and product (right) of the reaction between  $\text{CS}_2\text{Cl}^-$  + Choline and 4-R1i (downward attack to  $\text{C}_B$ ).

| Approximation | Orientation | R   | TS   | P    |
|---------------|-------------|-----|------|------|
| A             | upward      | 0.0 | 44.8 | 10.9 |
| A             | downward    | 0.0 | 24.9 | 9.5  |
| B             | upward      | 0.0 | 47.9 | 9.8  |
| B             | downward    | 0.0 | 14.0 | -2.8 |

**Table S32.** Energies of the reactants (R), transition state (TS) and products (P) involved in the solvated reaction between  $\text{CS}_2\text{Cl}^-$  + Choline and 4-R1i across various approximations and orientations. All energies are reported, relative to the reactant complex, as the Morokuma-corrected Gibbs free energies (373.15 K).

| Atom         | R     | TS    | P     |
|--------------|-------|-------|-------|
| $\text{C}_A$ | -0.02 | +0.05 | +0.01 |
| $\text{C}_B$ | -0.02 | +0.05 | +0.03 |
| $\text{S}'$  | +0.11 | +0.24 | +0.43 |
| S            | -0.09 | -0.41 | -0.52 |

**Table S33.** Atomic charges (in electrons) for the most relevant atoms involved in the reaction between  $\text{CS}_2\text{Cl}^-$  + Choline and 4-R1i (upward attack to  $\text{C}_A$ ). The results for the reactants (R), transition state (TS) and product (P) are shown.

| Atom         | R     | TS    | P     |
|--------------|-------|-------|-------|
| $\text{C}_A$ | -0.02 | +0.01 | +0.01 |
| $\text{C}_B$ | +0.01 | +0.05 | +0.05 |
| $\text{S}'$  | +0.16 | +0.24 | +0.38 |
| S            | -0.14 | -0.43 | -0.57 |

**Table S34.** Atomic charges (in electrons) for the most relevant atoms involved in the reaction between  $\text{CS}_2\text{Cl}^-$  + Choline and 4-R1i (downward attack to  $\text{C}_A$ ). The results for the reactants (R), transition state (TS) and product (P) are shown.

| Atom         | R     | TS    | P     |
|--------------|-------|-------|-------|
| $\text{C}_A$ | -0.03 | +0.01 | +0.03 |
| $\text{C}_B$ | -0.03 | +0.01 | +0.01 |
| $\text{S}'$  | +0.08 | +0.28 | +0.41 |
| S            | -0.14 | -0.43 | -0.60 |

**Table S35.** Atomic charges (in electrons) for the most relevant atoms involved in the reaction between  $\text{CS}_2\text{Cl}^-$  + Choline and 4-R1i (upward attack to  $\text{C}_B$ ). The results for the reactants (R), transition state (TS) and product (P) are shown.

| Atom         | R     | TS    | P     |
|--------------|-------|-------|-------|
| $\text{C}_A$ | -0.01 | +0.03 | +0.05 |
| $\text{C}_B$ | -0.02 | +0.01 | +0.00 |
| $\text{S}'$  | +0.13 | +0.21 | +0.34 |
| S            | -0.20 | -0.46 | -0.60 |

**Table S36.** Atomic charges (in electrons) for the most relevant atoms involved in the reaction between  $\text{CS}_2\text{Cl}^-$  + Choline and 4-R1i (downward attack to  $\text{C}_B$ ). The results for the reactants (R), transition state (TS) and product (P) are shown.



| Atomic Pair        | R    | TS   | P    |
|--------------------|------|------|------|
| S-C <sub>A</sub>   | 1.01 | 0.36 | 0.09 |
| S-C <sub>B</sub>   | 1.05 | 1.07 | 1.16 |
| C <sub>A</sub> -S' | 0.01 | 0.38 | 0.94 |

**Table S37.** Delocalization Index (DI, in electron pairs) for the most relevant atomic pairs involved in the reaction between CS<sub>2</sub>Cl<sup>-</sup> + Choline and 4-R1i (upward attack to C<sub>A</sub>). The results for the reactants (R), transition state (TS) and product (P) are shown.

| Atomic Pair        | R    | TS   | P    |
|--------------------|------|------|------|
| S-C <sub>A</sub>   | 1.00 | 0.42 | 0.09 |
| S-C <sub>B</sub>   | 1.04 | 1.08 | 1.15 |
| C <sub>A</sub> -S' | 0.02 | 0.49 | 0.96 |

**Table S38.** Delocalization Index (DI, in electron pairs) for the most relevant atomic pairs involved in the reaction between CS<sub>2</sub>Cl<sup>-</sup> + Choline and 4-R1i (downward attack to C<sub>A</sub>). The results for the reactants (R), transition state (TS) and product (P) are shown.

| Atomic Pair        | R    | TS   | P    |
|--------------------|------|------|------|
| S-C <sub>A</sub>   | 1.02 | 1.04 | 1.12 |
| S-C <sub>B</sub>   | 1.04 | 0.42 | 0.09 |
| C <sub>B</sub> -S' | 0.03 | 0.43 | 0.98 |

**Table S39.** Delocalization Index (DI, in electron pairs) for the most relevant atomic pairs involved in the reaction between CS<sub>2</sub>Cl<sup>-</sup> + Choline and 4-R1i (upward attack to C<sub>B</sub>). The results for the reactants (R), transition state (TS) and product (P) are shown.

| Atomic Pair        | R    | TS   | P    |
|--------------------|------|------|------|
| S-C <sub>A</sub>   | 1.00 | 1.04 | 1.12 |
| S-C <sub>B</sub>   | 1.01 | 0.51 | 0.10 |
| C <sub>B</sub> -S' | 0.03 | 0.46 | 0.99 |

**Table S40.** Delocalization Index (DI, in electron pairs) for the most relevant atomic pairs involved in the reaction between CS<sub>2</sub>Cl<sup>-</sup> + Choline and 4-R1i (downward attack to C<sub>B</sub>). The results for the reactants (R), transition state (TS) and product (P) are shown.

The upcoming section comprises the optimized geometries of the reactants (R), transition state (TS) and product (P) involved in the reaction across different approximations and orientations. All values are reported as XYZ Cartesian Coordinates in Angstroms.

**[R, Approximation: A Orientation: Upward]**

|    |           |           |           |
|----|-----------|-----------|-----------|
| C  | 2.445016  | -3.213720 | 0.977560  |
| C  | 1.305162  | -2.608048 | 1.693394  |
| H  | 2.991567  | -4.033252 | 1.450313  |
| H  | 1.112624  | -2.977212 | 2.705363  |
| S  | -1.656490 | 2.845067  | 1.030259  |
| C  | -0.990864 | 1.620837  | 1.928202  |
| S  | 0.595810  | 1.164116  | 2.169100  |
| Cl | -2.206135 | 0.566675  | 2.804879  |
| H  | 2.381304  | -3.253883 | -0.113897 |
| C  | 0.039379  | -2.199048 | 0.981507  |
| H  | -0.626812 | -3.081402 | 0.955853  |
| H  | -0.464276 | -1.413843 | 1.568836  |
| O  | 0.312478  | -1.753296 | -0.326204 |
| C  | -0.516022 | -2.265448 | -1.336169 |
| H  | -0.582906 | -3.367368 | -1.260354 |
| H  | -0.006084 | -2.048416 | -2.290309 |
| C  | -1.909389 | -1.671285 | -1.361198 |

|   |           |           |           |
|---|-----------|-----------|-----------|
| C | -2.243098 | -0.578398 | -0.560262 |
| C | -2.879318 | -2.207482 | -2.217403 |
| C | -3.523977 | -0.024321 | -0.606734 |
| H | -1.503630 | -0.160295 | 0.122850  |
| C | -4.155504 | -1.652637 | -2.271782 |
| H | -2.631772 | -3.068511 | -2.844314 |
| C | -4.481812 | -0.558575 | -1.465362 |
| H | -3.749826 | 0.826062  | 0.040733  |
| H | -4.903783 | -2.079110 | -2.942425 |
| H | -5.484677 | -0.130104 | -1.504439 |
| C | 2.719822  | 1.266113  | -1.127343 |
| N | 1.565380  | 2.095996  | -1.616803 |
| C | 1.470981  | 3.309586  | -0.749903 |
| H | 0.673128  | 3.952183  | -1.137697 |
| H | 1.221437  | 2.986116  | 0.269561  |
| H | 2.436483  | 3.828498  | -0.780243 |
| C | 1.769029  | 2.522600  | -3.025952 |
| H | 2.694319  | 3.107268  | -3.088661 |
| H | 1.831253  | 1.641832  | -3.673427 |
| H | 0.912654  | 3.138269  | -3.324658 |
| C | 0.294447  | 1.316098  | -1.500947 |
| H | 0.264200  | 0.874015  | -0.497207 |
| H | -0.549988 | 1.998715  | -1.643476 |
| H | 0.287287  | 0.531692  | -2.266564 |
| C | 2.834145  | -0.123757 | -1.749792 |
| H | 2.577962  | 1.164035  | -0.040489 |
| H | 3.635974  | 1.839808  | -1.323500 |
| O | 4.029048  | -0.709702 | -1.319136 |
| H | 2.874960  | -0.064157 | -2.848527 |
| H | 1.963979  | -0.732542 | -1.456495 |
| H | 3.869658  | -1.012843 | -0.413392 |
| S | 2.780768  | -1.550564 | 1.643583  |

**[TS, Approximation: A Orientation: Upward]**

|    |           |           |           |
|----|-----------|-----------|-----------|
| C  | 1.773337  | -3.095501 | -0.705409 |
| C  | 0.614243  | -2.739620 | 0.101252  |
| H  | 1.943948  | -4.182352 | -0.714764 |
| H  | 0.397933  | -3.355716 | 0.976378  |
| S  | -0.996677 | 1.453629  | 2.799647  |
| C  | -0.697304 | -0.106871 | 2.367289  |
| S  | 0.749701  | -0.771790 | 1.782922  |
| Cl | -2.051177 | -1.280469 | 2.543168  |
| H  | 1.713367  | -2.701852 | -1.728652 |
| C  | -0.572821 | -2.133089 | -0.570927 |
| H  | -0.961901 | -2.966438 | -1.202691 |
| H  | -1.362479 | -1.867089 | 0.145091  |
| O  | -0.204413 | -1.053753 | -1.385595 |
| C  | -1.139045 | -0.727128 | -2.384129 |
| H  | -1.367919 | -1.614387 | -3.003560 |
| H  | -0.632292 | -0.001771 | -3.041082 |
| C  | -2.426291 | -0.129870 | -1.853983 |
| C  | -2.468694 | 0.469325  | -0.593001 |
| C  | -3.586927 | -0.149492 | -2.634185 |
| C  | -3.648944 | 1.033481  | -0.110347 |
| H  | -1.574140 | 0.473819  | 0.030848  |
| C  | -4.764117 | 0.429359  | -2.162479 |
| H  | -3.570308 | -0.625757 | -3.617947 |
| C  | -4.799508 | 1.019440  | -0.897594 |
| H  | -3.658242 | 1.469895  | 0.890853  |
| H  | -5.663516 | 0.408512  | -2.780471 |
| H  | -5.726087 | 1.458241  | -0.523987 |
| C  | 3.006210  | 1.302894  | -0.479677 |

|   |           |           |           |
|---|-----------|-----------|-----------|
| N | 2.061731  | 2.442171  | -0.187633 |
| C | 2.164033  | 2.762168  | 1.266276  |
| H | 1.566803  | 3.658203  | 1.472160  |
| H | 1.767250  | 1.912014  | 1.834972  |
| H | 3.218513  | 2.939401  | 1.508152  |
| C | 2.430150  | 3.644425  | -0.980026 |
| H | 3.428885  | 3.976013  | -0.673142 |
| H | 2.428988  | 3.391522  | -2.045697 |
| H | 1.693712  | 4.432392  | -0.783397 |
| C | 0.654297  | 2.046619  | -0.497377 |
| H | 0.475011  | 1.060337  | -0.050531 |
| H | -0.021518 | 2.797355  | -0.071394 |
| H | 0.529731  | 2.000553  | -1.585391 |
| C | 2.785557  | 0.579475  | -1.808398 |
| H | 2.883169  | 0.572738  | 0.333471  |
| H | 4.023088  | 1.717331  | -0.450437 |
| O | 3.860807  | -0.274531 | -2.032654 |
| H | 2.740907  | 1.295208  | -2.646753 |
| H | 1.826797  | 0.032493  | -1.766991 |
| H | 3.776205  | -0.994358 | -1.364510 |
| S | 3.082338  | -2.258148 | 0.288763  |

**[P, Approximation: A Orientation: Upward]**

|    |           |           |           |
|----|-----------|-----------|-----------|
| C  | 1.628353  | -2.023124 | -1.825849 |
| C  | 0.373672  | -2.095484 | -0.937310 |
| H  | 1.512297  | -2.817561 | -2.581993 |
| H  | 0.095321  | -3.141243 | -0.747995 |
| S  | -0.724485 | -0.541268 | 3.028886  |
| C  | -0.558958 | -1.470746 | 1.691940  |
| S  | 0.850778  | -1.385840 | 0.699356  |
| Cl | -1.741085 | -2.725066 | 1.341882  |
| H  | 1.605782  | -1.067839 | -2.374029 |
| C  | -0.796525 | -1.350636 | -1.560396 |
| H  | -0.925174 | -1.740756 | -2.589104 |
| H  | -1.737918 | -1.534249 | -1.017434 |
| O  | -0.507113 | 0.028607  | -1.600698 |
| C  | -1.496264 | 0.799578  | -2.230073 |
| H  | -1.751603 | 0.376347  | -3.219187 |
| H  | -1.044908 | 1.788202  | -2.413089 |
| C  | -2.755431 | 0.958665  | -1.401933 |
| C  | -2.707966 | 0.830315  | -0.010950 |
| C  | -3.976085 | 1.255750  | -2.014709 |
| C  | -3.861255 | 0.987460  | 0.756426  |
| H  | -1.759644 | 0.585229  | 0.471558  |
| C  | -5.127761 | 1.430383  | -1.248181 |
| H  | -4.026677 | 1.345478  | -3.102870 |
| C  | -5.074332 | 1.292881  | 0.139382  |
| H  | -3.808382 | 0.860842  | 1.839516  |
| H  | -6.075137 | 1.661638  | -1.738288 |
| H  | -5.979066 | 1.414947  | 0.737041  |
| C  | 3.127700  | 1.330022  | 0.113698  |
| N  | 2.283076  | 2.241393  | 0.978462  |
| C  | 2.380813  | 1.767945  | 2.388891  |
| H  | 1.890399  | 2.500403  | 3.041558  |
| H  | 1.871337  | 0.799685  | 2.467715  |
| H  | 3.440459  | 1.669905  | 2.651597  |
| C  | 2.799644  | 3.634541  | 0.894842  |
| H  | 3.809248  | 3.660685  | 1.320137  |
| H  | 2.827355  | 3.945213  | -0.155255 |
| H  | 2.132568  | 4.293203  | 1.463439  |
| C  | 0.846609  | 2.222740  | 0.561347  |
| H  | 0.520666  | 1.181135  | 0.455162  |

|   |          |           |           |
|---|----------|-----------|-----------|
| H | 0.259985 | 2.738136  | 1.331400  |
| H | 0.746095 | 2.744639  | -0.396479 |
| C | 2.770691 | 1.313119  | -1.372903 |
| H | 3.030141 | 0.306720  | 0.501890  |
| H | 4.168898 | 1.656091  | 0.238049  |
| O | 3.753689 | 0.625816  | -2.067893 |
| H | 2.722229 | 2.340556  | -1.775347 |
| H | 1.767649 | 0.862421  | -1.495609 |
| H | 3.733229 | -0.321326 | -1.753653 |
| S | 3.197566 | -2.198390 | -0.924275 |

**[R, Approximation: A Orientation: Downward]**

|    |           |           |           |
|----|-----------|-----------|-----------|
| C  | 2.439681  | 3.016020  | -1.891221 |
| C  | 1.660946  | 1.887660  | -1.352588 |
| H  | 3.419734  | 3.223403  | -1.456433 |
| H  | 2.123195  | 1.343364  | -0.524594 |
| S  | 0.574618  | -2.556885 | -1.170314 |
| C  | 2.029885  | -2.359283 | -0.406145 |
| S  | 3.313599  | -1.354030 | -0.699694 |
| Cl | 2.236789  | -3.439617 | 1.094237  |
| H  | 2.342681  | 3.250200  | -2.954880 |
| C  | 0.780287  | 1.056204  | -2.241618 |
| H  | 0.534126  | 1.626007  | -3.158038 |
| H  | 1.323295  | 0.131712  | -2.517021 |
| O  | -0.396239 | 0.732192  | -1.542018 |
| C  | -1.344104 | 0.073815  | -2.354764 |
| H  | -0.900875 | -0.832053 | -2.799666 |
| H  | -1.648730 | 0.749609  | -3.177981 |
| C  | -2.535332 | -0.285629 | -1.508887 |
| C  | -2.922711 | -1.615903 | -1.330130 |
| C  | -3.239902 | 0.724851  | -0.842415 |
| C  | -3.994962 | -1.934571 | -0.494183 |
| H  | -2.367250 | -2.410106 | -1.833451 |
| C  | -4.307623 | 0.409514  | -0.004542 |
| H  | -2.937973 | 1.765799  | -0.984504 |
| C  | -4.685704 | -0.924025 | 0.173166  |
| H  | -4.286143 | -2.977756 | -0.360953 |
| H  | -4.854060 | 1.204878  | 0.506411  |
| H  | -5.523985 | -1.172986 | 0.826323  |
| H  | 1.303877  | 3.172852  | 1.429486  |
| O  | 1.047968  | 2.883831  | 2.322957  |
| C  | -0.339190 | 2.713290  | 2.350231  |
| H  | -0.649179 | 2.735637  | 3.405458  |
| H  | -0.871982 | 3.546880  | 1.857345  |
| C  | -0.854134 | 1.442778  | 1.684725  |
| H  | -1.935181 | 1.364471  | 1.871114  |
| H  | -0.697097 | 1.445329  | 0.595006  |
| N  | -0.234997 | 0.157083  | 2.177257  |
| C  | -1.110463 | -0.974418 | 1.750286  |
| H  | -1.274556 | -0.888315 | 0.669434  |
| H  | -0.588957 | -1.916949 | 1.958083  |
| H  | -2.059832 | -0.916444 | 2.296321  |
| C  | -0.082438 | 0.147914  | 3.654330  |
| H  | -1.051423 | 0.371664  | 4.117467  |
| H  | 0.255127  | -0.850573 | 3.955423  |
| H  | 0.666139  | 0.895868  | 3.938887  |
| C  | 1.100664  | -0.048060 | 1.531923  |
| H  | 0.925793  | -0.131024 | 0.453324  |
| H  | 1.740218  | 0.803125  | 1.779424  |
| H  | 1.526397  | -0.985480 | 1.908710  |
| S  | 1.006970  | 3.530644  | -0.892494 |

**[TS, Approximation: A Orientation: Downward]**

|    |           |           |           |
|----|-----------|-----------|-----------|
| C  | -2.493311 | -2.271721 | -1.568512 |
| C  | -1.643439 | -1.188953 | -1.063194 |
| H  | -3.194507 | -2.677520 | -0.828651 |
| H  | -1.172915 | -1.365155 | -0.101620 |
| S  | -1.302619 | 2.498172  | 0.040296  |
| C  | -2.743067 | 1.751838  | 0.310567  |
| S  | -3.252269 | 0.167952  | 0.005478  |
| Cl | -4.046790 | 2.737649  | 1.053852  |
| H  | -3.014674 | -2.030610 | -2.504338 |
| C  | -0.934641 | -0.253841 | -2.006093 |
| H  | -0.852191 | -0.735797 | -2.996051 |
| H  | -1.508030 | 0.683457  | -2.119741 |
| O  | 0.337096  | 0.030066  | -1.480102 |
| C  | 1.018022  | 1.023371  | -2.207981 |
| H  | 0.414165  | 1.947451  | -2.243738 |
| H  | 1.179397  | 0.680947  | -3.248328 |
| C  | 2.336264  | 1.285884  | -1.532230 |
| C  | 2.603553  | 2.512211  | -0.918780 |
| C  | 3.291194  | 0.263498  | -1.457711 |
| C  | 3.806373  | 2.716963  | -0.238569 |
| H  | 1.859567  | 3.310663  | -0.968028 |
| C  | 4.490283  | 0.463914  | -0.777466 |
| H  | 3.082948  | -0.695211 | -1.939557 |
| C  | 4.749049  | 1.692592  | -0.163650 |
| H  | 4.005359  | 3.680187  | 0.234358  |
| H  | 5.231498  | -0.336440 | -0.731703 |
| H  | 5.690694  | 1.852762  | 0.364559  |
| H  | -0.693589 | -3.440901 | 0.309578  |
| O  | -0.346535 | -3.290881 | 1.227680  |
| C  | 1.038396  | -3.191519 | 1.112042  |
| H  | 1.511295  | -3.693813 | 1.972362  |
| H  | 1.408440  | -3.709320 | 0.209147  |
| C  | 1.558937  | -1.766790 | 0.987603  |
| H  | 2.657796  | -1.789222 | 0.949277  |
| H  | 1.184553  | -1.282825 | 0.072971  |
| N  | 1.201589  | -0.836913 | 2.130361  |
| C  | 2.091944  | 0.355724  | 2.037207  |
| H  | 1.992521  | 0.781659  | 1.031114  |
| H  | 1.777623  | 1.088745  | 2.789470  |
| H  | 3.126527  | 0.041235  | 2.217399  |
| C  | 1.391096  | -1.499928 | 3.446121  |
| H  | 2.407657  | -1.908633 | 3.498623  |
| H  | 1.245624  | -0.750756 | 4.233218  |
| H  | 0.649659  | -2.299573 | 3.552103  |
| C  | -0.216125 | -0.369298 | 2.011825  |
| H  | -0.320377 | 0.162708  | 1.056554  |
| H  | -0.871279 | -1.243990 | 2.054936  |
| H  | -0.418559 | 0.317713  | 2.842806  |
| S  | -1.006771 | -3.311534 | -1.817176 |

**[P, Approximation: A Orientation: Downward]**

|    |          |           |           |
|----|----------|-----------|-----------|
| C  | 1.717366 | 1.583515  | -2.080374 |
| C  | 1.876444 | 0.449541  | -1.068341 |
| H  | 2.277801 | 2.459718  | -1.715371 |
| H  | 1.470690 | 0.751297  | -0.094080 |
| S  | 2.536228 | -1.208521 | 1.608705  |
| C  | 3.751050 | -0.686067 | 0.668438  |
| S  | 3.686232 | 0.220767  | -0.799040 |
| Cl | 5.432034 | -1.011102 | 1.078509  |
| H  | 2.195458 | 1.278013  | -3.028178 |
| C  | 1.231955 | -0.872508 | -1.492729 |

|   |           |           |           |
|---|-----------|-----------|-----------|
| H | 1.080702  | -0.863323 | -2.588584 |
| H | 1.890148  | -1.725751 | -1.244348 |
| O | -0.004310 | -1.035791 | -0.843783 |
| C | -0.597493 | -2.277565 | -1.121762 |
| H | -0.115947 | -3.084675 | -0.537282 |
| H | -0.466174 | -2.523976 | -2.192856 |
| C | -2.068312 | -2.197364 | -0.812307 |
| C | -2.690704 | -3.092441 | 0.060176  |
| C | -2.825850 | -1.183137 | -1.413111 |
| C | -4.057123 | -2.981535 | 0.330496  |
| H | -2.101461 | -3.880546 | 0.534810  |
| C | -4.188342 | -1.072864 | -1.145069 |
| H | -2.320622 | -0.476876 | -2.079345 |
| C | -4.806814 | -1.971442 | -0.270476 |
| H | -4.535303 | -3.686651 | 1.012660  |
| H | -4.773815 | -0.284712 | -1.622850 |
| H | -5.875229 | -1.886753 | -0.063726 |
| H | -0.265939 | 3.120789  | -0.608307 |
| O | -0.691232 | 3.517296  | 0.214172  |
| C | -2.034245 | 3.193596  | 0.075322  |
| H | -2.635626 | 3.865690  | 0.708973  |
| H | -2.388572 | 3.343470  | -0.962181 |
| C | -2.347984 | 1.736971  | 0.386604  |
| H | -3.429764 | 1.559336  | 0.304005  |
| H | -1.806797 | 1.088582  | -0.319701 |
| N | -1.937178 | 1.274623  | 1.772327  |
| C | -2.734462 | 0.064085  | 2.112024  |
| H | -2.610631 | -0.670071 | 1.306526  |
| H | -2.365676 | -0.346360 | 3.059646  |
| H | -3.789713 | 0.347324  | 2.204336  |
| C | -2.169228 | 2.328915  | 2.793633  |
| H | -3.215672 | 2.653228  | 2.744852  |
| H | -1.953415 | 1.904333  | 3.781251  |
| H | -1.495153 | 3.167245  | 2.586615  |
| C | -0.487332 | 0.901878  | 1.770968  |
| H | -0.341479 | 0.079732  | 1.057604  |
| H | 0.078672  | 1.783699  | 1.455360  |
| H | -0.212492 | 0.595154  | 2.787886  |
| S | -0.030431 | 2.006813  | -2.369210 |

**[R, Approximation: B Orientation: Upward]**

|    |           |           |           |
|----|-----------|-----------|-----------|
| C  | -1.511744 | -1.374921 | 0.794414  |
| C  | -0.774278 | -1.959082 | 1.932608  |
| H  | 0.300438  | -2.138949 | 1.810004  |
| S  | 2.782278  | -1.182859 | 1.471192  |
| C  | 2.952708  | -1.981460 | 0.013597  |
| Cl | 4.299344  | -1.291281 | -1.060947 |
| S  | 2.135296  | -3.256326 | -0.629900 |
| H  | -2.561395 | -1.659928 | 0.679147  |
| C  | -0.739382 | -1.084460 | -0.471277 |
| H  | -0.861295 | -1.915933 | -1.187904 |
| H  | 0.328694  | -1.013109 | -0.215788 |
| O  | -1.089198 | 0.136886  | -1.095234 |
| C  | -2.221483 | 0.117112  | -1.944262 |
| H  | -2.127160 | -0.708866 | -2.669956 |
| H  | -2.181235 | 1.064012  | -2.503643 |
| C  | -3.529604 | 0.010526  | -1.196042 |
| C  | -4.445994 | -1.002112 | -1.485666 |
| C  | -3.815180 | 0.921219  | -0.171102 |
| C  | -5.633724 | -1.110354 | -0.759553 |
| H  | -4.224314 | -1.719724 | -2.279515 |
| C  | -4.994588 | 0.809094  | 0.559702  |

|   |           |           |           |
|---|-----------|-----------|-----------|
| H | -3.095861 | 1.712303  | 0.058836  |
| C | -5.906162 | -0.208394 | 0.267136  |
| H | -6.342364 | -1.907225 | -0.991226 |
| H | -5.204974 | 1.516576  | 1.363413  |
| H | -6.829604 | -0.296458 | 0.841883  |
| H | -1.306896 | -2.655814 | 2.584026  |
| C | 1.911447  | 1.407647  | -1.301920 |
| H | 0.852301  | 1.553273  | -1.528772 |
| H | 2.092335  | 0.397591  | -0.916311 |
| N | 2.322391  | 2.385831  | -0.247327 |
| C | 2.206239  | 3.766906  | -0.786727 |
| H | 2.452453  | 4.481770  | 0.007566  |
| H | 2.915798  | 3.870811  | -1.615671 |
| H | 1.181482  | 3.919339  | -1.142281 |
| C | 3.745308  | 2.110525  | 0.115119  |
| H | 4.347830  | 2.136751  | -0.800212 |
| H | 4.082242  | 2.882419  | 0.816726  |
| H | 3.798077  | 1.113049  | 0.573189  |
| C | 1.471756  | 2.201328  | 0.993624  |
| H | 2.532693  | 1.579751  | -2.188900 |
| C | 0.127721  | 2.913306  | 0.977971  |
| H | 2.062017  | 2.575628  | 1.841798  |
| H | 1.347421  | 1.115093  | 1.119779  |
| O | -0.665605 | 2.640875  | -0.137204 |
| H | -0.362020 | 2.627801  | 1.926337  |
| H | 0.271016  | 4.003651  | 1.016905  |
| H | -0.828223 | 1.678800  | -0.218899 |
| S | -1.230379 | -0.211129 | 2.159998  |

**[TS, Approximation: B Orientation: Upward]**

|    |           |           |           |
|----|-----------|-----------|-----------|
| C  | 1.202184  | -1.331308 | -0.387591 |
| C  | 0.233057  | -2.258981 | -0.953367 |
| H  | -0.434267 | -2.831359 | -0.297970 |
| S  | -2.090212 | -1.391058 | -1.411328 |
| C  | -2.926443 | -2.132670 | -0.156961 |
| Cl | -4.291961 | -1.126452 | 0.517176  |
| S  | -2.637874 | -3.573763 | 0.580143  |
| H  | 2.245426  | -1.656385 | -0.525718 |
| C  | 0.868363  | -0.962986 | 1.055645  |
| H  | 1.258220  | -1.742080 | 1.738755  |
| H  | -0.229605 | -0.957991 | 1.155784  |
| O  | 1.310898  | 0.307679  | 1.463997  |
| C  | 2.608210  | 0.365355  | 2.014820  |
| H  | 2.678858  | -0.308300 | 2.888395  |
| H  | 2.724194  | 1.398393  | 2.374653  |
| C  | 3.700688  | 0.033622  | 1.024797  |
| C  | 4.581436  | -1.027456 | 1.249755  |
| C  | 3.808449  | 0.773448  | -0.159148 |
| C  | 5.557922  | -1.350762 | 0.306327  |
| H  | 4.496592  | -1.611673 | 2.169641  |
| C  | 4.774384  | 0.445036  | -1.106732 |
| H  | 3.113414  | 1.596116  | -0.340972 |
| C  | 5.650402  | -0.617803 | -0.876106 |
| H  | 6.240495  | -2.182080 | 0.490945  |
| H  | 4.840218  | 1.016891  | -2.033753 |
| H  | 6.405912  | -0.874423 | -1.620744 |
| H  | 0.484290  | -2.738226 | -1.901546 |
| C  | -1.766793 | 1.423005  | 1.112033  |
| H  | -0.714921 | 1.569799  | 1.375382  |
| H  | -1.897310 | 0.493251  | 0.544612  |
| N  | -2.222407 | 2.550932  | 0.237016  |
| C  | -2.077088 | 3.837194  | 0.967078  |

|   |           |           |           |
|---|-----------|-----------|-----------|
| H | -2.362785 | 4.660300  | 0.300788  |
| H | -2.739582 | 3.815840  | 1.840330  |
| H | -1.034270 | 3.938763  | 1.286504  |
| C | -3.655408 | 2.319332  | -0.100919 |
| H | -4.226157 | 2.228873  | 0.830942  |
| H | -4.021525 | 3.165838  | -0.693267 |
| H | -3.727079 | 1.383917  | -0.668886 |
| C | -1.441714 | 2.560931  | -1.059067 |
| H | -2.401291 | 1.413211  | 2.006641  |
| C | -0.053658 | 3.186680  | -0.973051 |
| H | -2.043377 | 3.125290  | -1.785370 |
| H | -1.379579 | 1.509811  | -1.374852 |
| O | 0.730521  | 2.729064  | 0.083526  |
| H | 0.413122  | 2.999201  | -1.957731 |
| H | -0.138435 | 4.279145  | -0.866338 |
| H | 0.895319  | 1.771074  | -0.044700 |
| S | 0.813024  | -0.037667 | -1.635559 |

**[P, Approximation: B Orientation: Upward]**

|    |           |           |           |
|----|-----------|-----------|-----------|
| C  | 0.850468  | -1.072327 | -0.674549 |
| C  | -0.020539 | -2.212381 | -1.202788 |
| H  | 0.013437  | -3.130285 | -0.596427 |
| S  | -1.773190 | -1.711814 | -1.345904 |
| C  | -2.556229 | -2.510864 | -0.031336 |
| Cl | -4.272336 | -2.059220 | -0.075656 |
| S  | -1.987919 | -3.479903 | 1.137830  |
| H  | 1.892700  | -1.414670 | -0.794786 |
| C  | 0.567325  | -0.879860 | 0.819668  |
| H  | 0.911291  | -1.769033 | 1.385227  |
| H  | -0.523842 | -0.815476 | 0.963907  |
| O  | 1.105864  | 0.288788  | 1.388333  |
| C  | 2.376692  | 0.168986  | 1.976426  |
| H  | 2.362386  | -0.607096 | 2.765235  |
| H  | 2.562789  | 1.138059  | 2.463899  |
| C  | 3.490654  | -0.131168 | 0.998715  |
| C  | 4.292570  | -1.264912 | 1.149351  |
| C  | 3.709344  | 0.721518  | -0.090491 |
| C  | 5.304014  | -1.548257 | 0.229647  |
| H  | 4.118847  | -1.937898 | 1.993117  |
| C  | 4.712134  | 0.435875  | -1.013308 |
| H  | 3.066340  | 1.593610  | -0.223369 |
| C  | 5.511382  | -0.698812 | -0.855726 |
| H  | 5.923554  | -2.437836 | 0.356696  |
| H  | 4.864571  | 1.097584  | -1.867622 |
| H  | 6.294846  | -0.920885 | -1.582584 |
| H  | 0.269529  | -2.446282 | -2.235142 |
| C  | -1.801780 | 1.542256  | 0.929939  |
| H  | -0.744556 | 1.565849  | 1.214507  |
| H  | -1.955595 | 0.775312  | 0.161204  |
| N  | -2.187097 | 2.868273  | 0.347425  |
| C  | -1.944993 | 3.934951  | 1.355512  |
| H  | -2.191805 | 4.907638  | 0.913118  |
| H  | -2.587959 | 3.741649  | 2.222470  |
| H  | -0.890477 | 3.896150  | 1.648652  |
| C  | -3.635099 | 2.820716  | 0.007995  |
| H  | -4.201709 | 2.566367  | 0.911399  |
| H  | -3.946336 | 3.799880  | -0.373540 |
| H  | -3.786748 | 2.049985  | -0.756946 |
| C  | -1.416701 | 3.134635  | -0.930305 |
| H  | -2.447006 | 1.358800  | 1.798798  |
| C  | 0.013930  | 3.631865  | -0.728401 |



|   |           |          |           |
|---|-----------|----------|-----------|
| H | -1.989930 | 3.887169 | -1.490066 |
| H | -1.409522 | 2.180246 | -1.474463 |
| O | 0.757983  | 2.892488 | 0.180391  |
| H | 0.460365  | 3.634615 | -1.741238 |
| H | 0.001875  | 4.679950 | -0.388212 |
| H | 0.855090  | 1.977646 | -0.210497 |
| S | 0.597823  | 0.421359 | -1.691991 |

**[R, Approximation: B Orientation: Downward]**

|    |           |           |           |
|----|-----------|-----------|-----------|
| C  | 0.550677  | -2.275469 | -0.602532 |
| C  | 1.406049  | -2.748838 | 0.498515  |
| H  | 2.255629  | -2.115088 | 0.773581  |
| H  | 1.525507  | -3.825188 | 0.640640  |
| S  | 4.354782  | -1.217986 | -0.880068 |
| C  | 4.295555  | -0.026987 | 0.276467  |
| Cl | 5.821659  | 0.973445  | 0.415607  |
| S  | 3.090898  | 0.417183  | 1.340259  |
| H  | 0.041173  | -3.042432 | -1.196313 |
| C  | 0.896565  | -1.015291 | -1.342326 |
| H  | 1.504823  | -1.272877 | -2.228345 |
| H  | 1.509651  | -0.366849 | -0.694185 |
| O  | -0.309280 | -0.387796 | -1.737860 |
| C  | -0.179867 | 0.950285  | -2.154036 |
| H  | -0.796538 | 1.092425  | -3.056102 |
| H  | 0.864471  | 1.161136  | -2.446034 |
| C  | -0.613660 | 1.939459  | -1.089665 |
| C  | -1.321435 | 3.091467  | -1.445286 |
| C  | -0.292487 | 1.731622  | 0.259176  |
| C  | -1.687334 | 4.032882  | -0.480447 |
| H  | -1.581914 | 3.259962  | -2.493542 |
| C  | -0.654684 | 2.672970  | 1.222887  |
| H  | 0.257303  | 0.836707  | 0.562236  |
| C  | -1.351524 | 3.827374  | 0.857129  |
| H  | -2.232006 | 4.931079  | -0.777239 |
| H  | -0.375195 | 2.507151  | 2.265196  |
| H  | -1.625460 | 4.566247  | 1.612144  |
| N  | -4.002601 | -0.162143 | 0.482524  |
| C  | -3.497946 | -0.530980 | 1.840422  |
| H  | -3.377269 | -1.616965 | 1.880397  |
| H  | -4.228345 | -0.191680 | 2.584593  |
| H  | -2.535938 | -0.026868 | 1.996800  |
| C  | -4.110970 | 1.323554  | 0.409492  |
| H  | -3.103706 | 1.749177  | 0.498322  |
| H  | -4.745896 | 1.670461  | 1.233145  |
| H  | -4.553221 | 1.598902  | -0.554377 |
| C  | -5.341059 | -0.774844 | 0.267441  |
| H  | -5.261263 | -1.855880 | 0.425397  |
| H  | -5.671557 | -0.555398 | -0.754848 |
| H  | -6.040708 | -0.338227 | 0.989176  |
| C  | -3.012188 | -0.606115 | -0.571741 |
| C  | -3.100617 | -2.067612 | -0.986489 |
| H  | -2.017142 | -0.354965 | -0.185562 |
| H  | -3.186642 | 0.018775  | -1.459523 |
| O  | -3.086913 | -2.989169 | 0.067028  |
| H  | -2.260719 | -2.207870 | -1.689057 |
| H  | -4.025003 | -2.242953 | -1.556603 |
| H  | -2.180533 | -3.052280 | 0.417488  |
| S  | -0.186330 | -2.065771 | 1.063698  |

**[TS, Approximation: B Orientation: Downward]**

|   |          |           |          |
|---|----------|-----------|----------|
| C | 1.138352 | -1.267834 | 0.033300 |
| C | 2.183482 | -1.580010 | 1.002036 |

|    |           |           |           |
|----|-----------|-----------|-----------|
| H  | 2.542651  | -0.798280 | 1.671827  |
| H  | 2.412278  | -2.619129 | 1.225894  |
| S  | 4.266848  | -1.419610 | -0.258685 |
| C  | 4.769388  | 0.154844  | 0.080880  |
| Cl | 6.292562  | 0.592101  | -0.778439 |
| S  | 4.109272  | 1.311512  | 1.047638  |
| H  | 1.011573  | -2.030119 | -0.746792 |
| C  | 1.120747  | 0.126662  | -0.535254 |
| H  | 1.973927  | 0.250219  | -1.230265 |
| H  | 1.239195  | 0.860649  | 0.279649  |
| O  | -0.101033 | 0.304177  | -1.221067 |
| C  | -0.418255 | 1.627011  | -1.562299 |
| H  | -0.821028 | 1.632238  | -2.588186 |
| H  | 0.493811  | 2.251423  | -1.580042 |
| C  | -1.438041 | 2.248251  | -0.626355 |
| C  | -2.324875 | 3.217996  | -1.105505 |
| C  | -1.504293 | 1.877759  | 0.723189  |
| C  | -3.253185 | 3.819720  | -0.254796 |
| H  | -2.287632 | 3.506790  | -2.159201 |
| C  | -2.429222 | 2.484080  | 1.575662  |
| H  | -0.842514 | 1.095911  | 1.107463  |
| C  | -3.306067 | 3.456161  | 1.091138  |
| H  | -3.936723 | 4.575811  | -0.645350 |
| H  | -2.460799 | 2.193708  | 2.627843  |
| H  | -4.026044 | 3.930462  | 1.760141  |
| N  | -3.999584 | -1.173255 | -0.120286 |
| C  | -3.692244 | -1.298644 | 1.337273  |
| H  | -3.146333 | -2.232848 | 1.492603  |
| H  | -4.639016 | -1.297357 | 1.890920  |
| H  | -3.071119 | -0.443912 | 1.630965  |
| C  | -4.693603 | 0.125743  | -0.351479 |
| H  | -3.994265 | 0.941477  | -0.128144 |
| H  | -5.566764 | 0.182162  | 0.309222  |
| H  | -5.007583 | 0.174223  | -1.400624 |
| C  | -4.887244 | -2.292667 | -0.534467 |
| H  | -4.398535 | -3.238511 | -0.276446 |
| H  | -5.059778 | -2.226854 | -1.615289 |
| H  | -5.837958 | -2.195571 | 0.002841  |
| C  | -2.709450 | -1.161359 | -0.913468 |
| C  | -2.117309 | -2.529855 | -1.220577 |
| H  | -1.998803 | -0.554433 | -0.340247 |
| H  | -2.920385 | -0.643845 | -1.860217 |
| O  | -1.965591 | -3.367894 | -0.115895 |
| H  | -1.159466 | -2.309638 | -1.725847 |
| H  | -2.744854 | -3.059435 | -1.953807 |
| H  | -1.255951 | -2.991095 | 0.452802  |
| S  | 0.025727  | -1.538426 | 1.469409  |

**[P, Approximation: B Orientation: Downward]**

|    |           |           |           |
|----|-----------|-----------|-----------|
| C  | 1.240784  | -1.161466 | 0.324305  |
| C  | 2.585698  | -1.371786 | 1.018292  |
| H  | 2.758092  | -0.625383 | 1.806415  |
| H  | 2.600884  | -2.369403 | 1.474963  |
| S  | 4.045589  | -1.371098 | -0.090161 |
| C  | 4.698718  | 0.227449  | 0.038852  |
| Cl | 6.113694  | 0.336440  | -1.008939 |
| S  | 4.213750  | 1.488014  | 0.929657  |
| H  | 1.161698  | -1.892499 | -0.499645 |
| C  | 1.144029  | 0.222880  | -0.297015 |
| H  | 2.020348  | 0.424549  | -0.946168 |
| H  | 1.135247  | 0.984203  | 0.504032  |
| O  | -0.028193 | 0.294636  | -1.081610 |

|   |           |           |           |
|---|-----------|-----------|-----------|
| C | -0.401291 | 1.579259  | -1.490543 |
| H | -0.804920 | 1.506773  | -2.513955 |
| H | 0.483077  | 2.241781  | -1.551709 |
| C | -1.447007 | 2.218607  | -0.594094 |
| C | -2.281761 | 3.218350  | -1.106273 |
| C | -1.595927 | 1.828815  | 0.742774  |
| C | -3.242109 | 3.829048  | -0.299547 |
| H | -2.180419 | 3.521281  | -2.152039 |
| C | -2.552285 | 2.447362  | 1.551317  |
| H | -0.985484 | 1.013035  | 1.146975  |
| C | -3.378243 | 3.447023  | 1.035951  |
| H | -3.886283 | 4.605970  | -0.715515 |
| H | -2.651574 | 2.138677  | 2.594298  |
| H | -4.124833 | 3.927369  | 1.670834  |
| N | -3.951099 | -1.243671 | -0.202790 |
| C | -3.686441 | -1.371474 | 1.263492  |
| H | -3.127642 | -2.295630 | 1.430380  |
| H | -4.651469 | -1.384632 | 1.784936  |
| H | -3.078882 | -0.515188 | 1.578129  |
| C | -4.676244 | 0.034754  | -0.444209 |
| H | -4.011623 | 0.868034  | -0.182357 |
| H | -5.576017 | 0.055200  | 0.182123  |
| H | -4.951197 | 0.089725  | -1.503998 |
| C | -4.788397 | -2.387253 | -0.650611 |
| H | -4.269782 | -3.316589 | -0.390284 |
| H | -4.935973 | -2.316532 | -1.734975 |
| H | -5.755001 | -2.331648 | -0.135893 |
| C | -2.639035 | -1.184860 | -0.959900 |
| C | -1.985459 | -2.531547 | -1.240691 |
| H | -1.960445 | -0.571010 | -0.355889 |
| H | -2.845798 | -0.673896 | -1.911558 |
| O | -1.834405 | -3.347558 | -0.125468 |
| H | -1.020621 | -2.267269 | -1.713749 |
| H | -2.564115 | -3.088106 | -1.996243 |
| H | -1.194011 | -2.880826 | 0.488620  |
| S | -0.067323 | -1.473751 | 1.567866  |

#### 4. Optimized geometries

The current section gathers the energetically minimized geometries of the different stationary points found across the computational studies for the transformation of **(R)-1a/(S)-1a** to **(R)-2a/(S)-2a**. All values are reported, as XYZ Cartesian coordinates, in Angstroms.

| [CS <sub>2</sub> CLi] |           |           |           |
|-----------------------|-----------|-----------|-----------|
| C                     | 0.026058  | -0.000301 | 0.003157  |
| S                     | -0.714650 | 1.508126  | 0.007361  |
| Cl                    | 1.785779  | -0.000974 | -0.006500 |
| Li                    | -2.537424 | 0.001420  | -0.048004 |
| S                     | -0.716744 | -1.507245 | 0.007361  |

| [CSOCIL] |           |           |          |
|----------|-----------|-----------|----------|
| C        | 0.000000  | 0.311590  | 0.000000 |
| S        | -1.343371 | -0.730351 | 0.000000 |
| Cl       | 1.623290  | -0.423061 | 0.000000 |
| Li       | -1.926908 | 1.572707  | 0.000000 |
| O        | -0.040159 | 1.536250  | 0.000000 |

| [LiCl] |          |          |           |
|--------|----------|----------|-----------|
| Cl     | 0.000000 | 0.000000 | 0.308267  |
| Li     | 0.000000 | 0.000000 | -1.746846 |

| [1D] |           |           |           |
|------|-----------|-----------|-----------|
| C    | -1.053341 | -0.215288 | 1.571349  |
| C    | 0.255350  | 0.511042  | 1.151635  |
| H    | 0.114745  | 1.546037  | 0.813172  |
| H    | 0.969321  | 0.484207  | 1.984782  |
| O    | -0.814334 | -1.522146 | 1.807607  |
| C    | -2.149100 | 0.039869  | 0.524741  |
| C    | -2.766825 | -1.035751 | -0.113843 |
| C    | -2.559717 | 1.339274  | 0.199358  |
| C    | -3.760661 | -0.822982 | -1.071516 |
| H    | -2.460445 | -2.042919 | 0.170504  |
| C    | -3.550987 | 1.556834  | -0.754617 |
| H    | -2.104309 | 2.195194  | 0.706028  |
| C    | -4.153479 | 0.473281  | -1.397942 |
| H    | -4.234825 | -1.675659 | -1.561867 |
| H    | -3.858802 | 2.575916  | -0.996538 |
| H    | -4.930649 | 0.641733  | -2.145448 |
| S    | 0.959142  | -0.473389 | -0.218922 |
| C    | 2.615625  | 0.025255  | -0.419473 |
| Cl   | 3.119202  | 1.418265  | 0.512274  |
| S    | 3.618146  | -0.732092 | -1.438184 |
| Li   | 0.290493  | -2.647334 | 1.250723  |
| H    | -1.376066 | 0.342652  | 2.483226  |

| [R1A] |           |           |           |
|-------|-----------|-----------|-----------|
| C     | -1.606400 | 0.578760  | -0.223970 |
| C     | -2.568750 | 0.019180  | 0.742360  |
| O     | -2.462830 | -0.484630 | -0.566420 |
| H     | -3.490370 | 0.565950  | 0.969490  |
| H     | -2.189870 | -0.635950 | 1.535160  |
| C     | -0.150040 | 0.270120  | -0.127580 |
| C     | 0.784660  | 1.307200  | -0.057530 |
| C     | 0.290690  | -1.056700 | -0.091690 |
| C     | 2.143900  | 1.022040  | 0.062850  |
| H     | 0.444361  | 2.344530  | -0.099610 |
| C     | 1.649890  | -1.340160 | 0.026260  |
| H     | -0.444730 | -1.859500 | -0.172260 |

|   |           |           |           |
|---|-----------|-----------|-----------|
| C | 2.579440  | -0.302380 | 0.106610  |
| H | 2.866851  | 1.837720  | 0.117960  |
| H | 1.987100  | -2.377880 | 0.049680  |
| H | 3.643660  | -0.525980 | 0.196890  |
| H | -1.854730 | 1.539810  | -0.689800 |

[TS-R1A]

|   |           |           |           |
|---|-----------|-----------|-----------|
| C | -1.606400 | 0.578760  | -0.223970 |
| C | -2.568750 | 0.019180  | 0.742360  |
| O | -2.462830 | -0.484630 | -0.566420 |
| H | -3.490370 | 0.565950  | 0.969490  |
| H | -2.189870 | -0.635950 | 1.535160  |
| C | -0.150040 | 0.270120  | -0.127580 |
| C | 0.784660  | 1.307200  | -0.057530 |
| C | 0.290690  | -1.056700 | -0.091690 |
| C | 2.143900  | 1.022040  | 0.062850  |
| H | 0.444361  | 2.344530  | -0.099610 |
| C | 1.649890  | -1.340160 | 0.026260  |
| H | -0.444730 | -1.859500 | -0.172260 |
| C | 2.579440  | -0.302380 | 0.106610  |
| H | 2.866851  | 1.837720  | 0.117960  |
| H | 1.987100  | -2.377880 | 0.049680  |
| H | 3.643660  | -0.525980 | 0.196890  |
| H | -1.854730 | 1.539810  | -0.689800 |

[TS-R1B]

|    |           |           |           |
|----|-----------|-----------|-----------|
| C  | 0.034127  | 2.424296  | 0.040867  |
| C  | -0.633180 | 1.420731  | -0.805190 |
| O  | -1.241127 | 2.624286  | 0.536782  |
| H  | 0.803022  | 2.099583  | 0.761595  |
| S  | 1.568524  | 0.390417  | -1.401706 |
| C  | 1.967045  | -0.246321 | 0.102772  |
| Cl | 3.600432  | -0.944369 | 0.149068  |
| S  | 1.126597  | -0.372920 | 1.543363  |
| Li | -1.038554 | 1.151512  | 1.689784  |
| H  | 0.445211  | 3.250923  | -0.562875 |
| C  | -1.494035 | 0.210325  | -0.464065 |
| C  | -1.151600 | -1.114041 | -0.784179 |
| C  | -2.781560 | 0.432262  | 0.067627  |
| C  | -2.024665 | -2.166002 | -0.523845 |
| H  | -0.188314 | -1.334173 | -1.237324 |
| C  | -3.648813 | -0.628457 | 0.339302  |
| H  | -3.109396 | 1.454722  | 0.250199  |
| C  | -3.272739 | -1.935976 | 0.052563  |
| H  | -1.714207 | -3.181974 | -0.772100 |
| H  | -4.632062 | -0.415347 | 0.761997  |
| H  | -3.948011 | -2.766776 | 0.261994  |
| H  | -0.908319 | 1.837637  | -1.782887 |

[TS-R1C]

|   |           |           |           |
|---|-----------|-----------|-----------|
| C | -0.683129 | -0.133768 | 0.162301  |
| C | -0.066512 | 0.078698  | -1.155040 |
| O | -0.247046 | -1.432374 | 0.232813  |
| H | -0.235305 | 0.539300  | 0.923475  |
| C | -2.189742 | 0.051417  | 0.144354  |
| C | -2.760699 | 1.320235  | 0.288790  |
| C | -3.009322 | -1.061512 | -0.046007 |
| C | -4.144409 | 1.473060  | 0.240337  |
| H | -2.118068 | 2.189850  | 0.450185  |
| C | -4.395577 | -0.907776 | -0.085773 |
| H | -2.537615 | -2.040055 | -0.145997 |
| C | -4.964225 | 0.357942  | 0.053396  |

|    |           |           |           |
|----|-----------|-----------|-----------|
| H  | -4.587287 | 2.463655  | 0.357004  |
| H  | -5.035747 | -1.780695 | -0.225892 |
| H  | -6.048460 | 0.477435  | 0.021009  |
| H  | 0.605700  | 0.903141  | -1.402504 |
| H  | -0.469101 | -0.521298 | -1.974225 |
| S  | 2.390548  | -0.922608 | -1.290077 |
| C  | 2.760503  | 0.044374  | 0.055747  |
| S  | 2.847839  | -0.432751 | 1.637361  |
| Cl | 3.015670  | 1.759439  | -0.298808 |
| Li | 1.346786  | -2.111027 | 0.569672  |

**[TS-R1D]**

|    |           |           |           |
|----|-----------|-----------|-----------|
| C  | -1.287047 | 0.974822  | -1.129908 |
| C  | 0.086676  | 0.750514  | -0.636164 |
| O  | -0.969793 | 2.241740  | -0.659897 |
| H  | 0.885735  | 1.142007  | -1.259851 |
| H  | 0.182494  | 0.684709  | 0.445137  |
| S  | 1.448674  | -1.152726 | -0.593112 |
| C  | 2.704362  | -0.278051 | 0.110418  |
| Cl | 4.148121  | -1.258526 | 0.410386  |
| S  | 2.848301  | 1.326971  | 0.576175  |
| Li | 0.585637  | 2.812198  | 0.089447  |
| C  | -2.402045 | 0.251869  | -0.421319 |
| C  | -2.791942 | -1.019913 | -0.853562 |
| C  | -3.034554 | 0.831095  | 0.678772  |
| C  | -3.800762 | -1.708534 | -0.184541 |
| H  | -2.299454 | -1.472370 | -1.718319 |
| C  | -4.049677 | 0.142778  | 1.345005  |
| H  | -2.726753 | 1.828766  | 0.994689  |
| C  | -4.432640 | -1.127161 | 0.916780  |
| H  | -4.098688 | -2.701865 | -0.524394 |
| H  | -4.545803 | 0.602300  | 2.201777  |
| H  | -5.225968 | -1.665189 | 1.438270  |
| H  | -1.394018 | 0.913634  | -2.224929 |

**[1A]**

|    |           |           |           |
|----|-----------|-----------|-----------|
| C  | -0.322804 | 0.302499  | 0.700951  |
| C  | 0.181035  | -0.887621 | 1.571919  |
| H  | 1.109340  | -0.522134 | 2.074043  |
| H  | -0.575986 | -0.954642 | 2.390444  |
| O  | 0.356025  | -2.038343 | 0.887463  |
| C  | -1.773000 | 0.229077  | 0.278157  |
| C  | -2.455995 | 1.395068  | -0.089446 |
| C  | -2.446502 | -0.999248 | 0.243251  |
| C  | -3.793105 | 1.340110  | -0.477226 |
| H  | -1.932959 | 2.354640  | -0.066015 |
| C  | -3.785935 | -1.050058 | -0.141345 |
| H  | -1.896529 | -1.900952 | 0.521434  |
| C  | -4.461031 | 0.115411  | -0.503966 |
| H  | -4.316684 | 2.256371  | -0.755163 |
| H  | -4.306332 | -2.009313 | -0.158686 |
| H  | -5.508777 | 0.070440  | -0.806005 |
| S  | 0.624993  | 0.289441  | -0.903231 |
| C  | 2.296170  | 0.281209  | -0.375275 |
| Cl | 2.725333  | 1.495080  | 0.787906  |
| S  | 3.399270  | -0.743964 | -0.988565 |
| Li | 1.116596  | -2.253891 | -0.616196 |
| H  | -0.121925 | 1.271332  | 1.181060  |

**[1B]**

|   |           |          |          |
|---|-----------|----------|----------|
| C | -0.162526 | 1.126392 | 0.360887 |
| C | -0.412237 | 2.620897 | 0.012376 |

|    |           |           |           |
|----|-----------|-----------|-----------|
| H  | -0.754615 | 2.647488  | -1.050639 |
| H  | -1.315154 | 2.888332  | 0.610341  |
| O  | 0.657590  | 3.396069  | 0.254543  |
| C  | -1.354399 | 0.256804  | 0.059719  |
| C  | -1.732276 | -0.034804 | -1.256514 |
| C  | -2.161099 | -0.198047 | 1.108739  |
| C  | -2.888809 | -0.767679 | -1.515880 |
| H  | -1.106104 | 0.304527  | -2.084887 |
| C  | -3.318922 | -0.930351 | 0.851083  |
| H  | -1.870348 | 0.020216  | 2.139219  |
| C  | -3.685980 | -1.217490 | -0.463090 |
| H  | -3.167575 | -0.990751 | -2.547172 |
| H  | -3.933997 | -1.282189 | 1.681138  |
| H  | -4.589205 | -1.794870 | -0.667098 |
| S  | 1.342798  | 0.672689  | -0.588328 |
| C  | 1.851958  | -0.885875 | -0.031638 |
| Cl | 1.070299  | -1.506501 | 1.411588  |
| S  | 3.039223  | -1.712063 | -0.765654 |
| Li | 2.083074  | 4.129814  | 0.456949  |
| H  | 0.105366  | 1.070671  | 1.424525  |

**[1C]**

|    |           |           |           |
|----|-----------|-----------|-----------|
| C  | -0.990930 | 0.991701  | 0.574757  |
| C  | 0.104028  | -0.080247 | 0.316102  |
| H  | 0.048053  | -0.947572 | 0.987417  |
| H  | 0.052238  | -0.409384 | -0.731041 |
| O  | -0.747607 | 2.101790  | -0.155515 |
| C  | -2.334593 | 0.324127  | 0.273537  |
| C  | -2.840996 | -0.697619 | 1.085236  |
| C  | -3.067046 | 0.728135  | -0.842969 |
| C  | -4.054199 | -1.311441 | 0.779205  |
| H  | -2.283665 | -1.009626 | 1.973414  |
| C  | -4.283148 | 0.116531  | -1.151273 |
| H  | -2.661549 | 1.540315  | -1.447266 |
| C  | -4.778836 | -0.906458 | -0.343629 |
| H  | -4.440175 | -2.105189 | 1.421712  |
| H  | -4.850502 | 0.442892  | -2.025335 |
| H  | -5.730716 | -1.383925 | -0.582743 |
| S  | 1.700454  | 0.769260  | 0.569702  |
| C  | 2.955689  | -0.273622 | -0.036353 |
| Cl | 2.445096  | -1.862515 | -0.557819 |
| S  | 4.504184  | 0.191807  | -0.088060 |
| Li | 0.576782  | 2.937428  | -0.726213 |
| H  | -0.983831 | 1.184927  | 1.675558  |

**[S1a]**

|   |           |           |           |
|---|-----------|-----------|-----------|
| C | 1.606420  | 0.578899  | -0.223713 |
| C | 2.568757  | 0.018851  | 0.742293  |
| O | 2.462784  | -0.484336 | -0.566745 |
| H | 2.190012  | -0.636560 | 1.534908  |
| H | 3.490414  | 0.565431  | 0.969730  |
| C | 0.150047  | 0.270162  | -0.127449 |
| C | -0.784677 | 1.307192  | -0.057436 |
| C | -0.290654 | -1.056681 | -0.091603 |
| C | -2.143945 | 1.021995  | 0.062827  |
| H | -0.444442 | 2.344537  | -0.099468 |
| C | -1.649837 | -1.340182 | 0.026190  |
| H | 0.444782  | -1.859468 | -0.172130 |
| C | -2.579438 | -0.302426 | 0.106533  |
| H | -2.866902 | 1.837649  | 0.117912  |
| H | -1.987031 | -2.377896 | 0.049558  |
| H | -3.643646 | -0.526069 | 0.196724  |

|   |          |          |           |
|---|----------|----------|-----------|
| H | 1.854510 | 1.540212 | -0.689116 |
|---|----------|----------|-----------|

**[TS-1A]**

|    |           |           |           |
|----|-----------|-----------|-----------|
| C  | 0.005791  | 1.504338  | 1.238727  |
| C  | 0.598290  | 0.164797  | 0.939570  |
| O  | 0.008259  | 2.133120  | 0.029086  |
| H  | -1.000254 | 1.355923  | 1.687807  |
| H  | 0.019713  | -0.747232 | 1.123948  |
| S  | -1.163690 | -0.706427 | -1.399349 |
| C  | -2.430831 | -0.351156 | -0.352149 |
| S  | -3.354239 | 1.030196  | -0.284712 |
| Cl | -2.790145 | -1.609952 | 0.862706  |
| Li | -1.177454 | 1.752490  | -1.216298 |
| C  | 1.902521  | -0.020604 | 0.414287  |
| C  | 2.376219  | -1.343292 | 0.245593  |
| C  | 2.765032  | 1.075301  | 0.154126  |
| C  | 3.691694  | -1.568929 | -0.130457 |
| H  | 1.692163  | -2.177315 | 0.418018  |
| C  | 4.074566  | 0.838567  | -0.222710 |
| H  | 2.354640  | 2.083526  | 0.222421  |
| C  | 4.535787  | -0.478731 | -0.360425 |
| H  | 4.063637  | -2.586182 | -0.253529 |
| H  | 4.746491  | 1.673185  | -0.424566 |
| H  | 5.569674  | -0.655235 | -0.663292 |
| H  | 0.625151  | 1.998038  | 2.024996  |

**[TS-1B]**

|    |           |           |           |
|----|-----------|-----------|-----------|
| C  | -0.247697 | 1.792599  | -0.946148 |
| C  | -0.549273 | 0.692586  | -0.028488 |
| O  | -0.687872 | 2.616014  | 0.083921  |
| H  | 0.816934  | 1.882891  | -1.233368 |
| S  | 1.049461  | -1.025136 | -0.797545 |
| C  | 2.385720  | -0.366206 | -0.038022 |
| Cl | 3.861586  | -1.330299 | -0.232600 |
| S  | 2.612905  | 1.021286  | 0.889080  |
| Li | 0.796877  | 2.784026  | 1.070531  |
| H  | -0.866639 | 1.810221  | -1.858370 |
| H  | 0.091276  | 0.586854  | 0.843539  |
| C  | -1.879443 | 0.067503  | 0.059838  |
| C  | -2.048252 | -1.063956 | 0.870575  |
| C  | -2.979631 | 0.584097  | -0.637769 |
| C  | -3.289557 | -1.685695 | 0.961251  |
| H  | -1.189267 | -1.466790 | 1.412069  |
| C  | -4.224258 | -0.029981 | -0.531086 |
| H  | -2.867772 | 1.493318  | -1.229496 |
| C  | -4.379924 | -1.169088 | 0.259883  |
| H  | -3.408152 | -2.573900 | 1.583333  |
| H  | -5.079514 | 0.384919  | -1.066333 |
| H  | -5.355457 | -1.652172 | 0.335094  |

**[TS-1C]**

|    |           |           |           |
|----|-----------|-----------|-----------|
| C  | 1.286988  | 0.975065  | -1.129276 |
| C  | -0.086660 | 0.750576  | -0.635418 |
| O  | 0.969676  | 2.241850  | -0.658944 |
| H  | -0.182521 | 0.684632  | 0.445873  |
| H  | -0.885713 | 1.142063  | -1.259095 |
| S  | -1.448548 | -1.152698 | -0.592855 |
| C  | -2.704585 | -0.278151 | 0.110218  |
| Cl | -4.147982 | -1.259031 | 0.410601  |
| S  | -2.849140 | 1.327031  | 0.575243  |
| Li | -0.586489 | 2.812471  | 0.088820  |
| C  | 2.402178  | 0.252051  | -0.421075 |



|   |          |           |           |
|---|----------|-----------|-----------|
| C | 3.034680 | 0.830927  | 0.679203  |
| C | 2.792282 | -1.019466 | -0.853914 |
| C | 4.050023 | 0.142525  | 1.345013  |
| H | 2.726701 | 1.828393  | 0.995589  |
| C | 3.801313 | -1.708177 | -0.185307 |
| H | 2.299785 | -1.471640 | -1.718815 |
| C | 4.433198 | -1.127149 | 0.916191  |
| H | 4.546159 | 0.601773  | 2.201927  |
| H | 4.099401 | -2.701298 | -0.525630 |
| H | 5.226701 | -1.665239 | 1.437351  |
| H | 1.393756 | 0.914102  | -2.224331 |

**[TS-1D]**

|    |           |           |           |
|----|-----------|-----------|-----------|
| C  | -1.141341 | -0.947131 | 0.786769  |
| C  | -0.140853 | -1.099729 | -0.278818 |
| O  | -0.362687 | -0.107660 | 1.535602  |
| H  | 0.086072  | -0.202893 | -0.862172 |
| H  | 0.236021  | -2.056093 | -0.644242 |
| S  | 2.388470  | -1.376086 | 0.537391  |
| C  | 2.837035  | 0.142041  | -0.089167 |
| S  | 2.693763  | 1.605364  | 0.668724  |
| Cl | 3.496080  | 0.124880  | -1.722156 |
| Li | 1.266633  | 0.166890  | 2.067410  |
| C  | -2.434844 | -0.346611 | 0.261899  |
| C  | -3.433162 | -1.159132 | -0.286151 |
| C  | -2.610748 | 1.037192  | 0.303371  |
| C  | -4.599650 | -0.588968 | -0.790839 |
| H  | -3.299964 | -2.244063 | -0.306830 |
| C  | -3.782605 | 1.605950  | -0.196116 |
| H  | -1.821950 | 1.648274  | 0.744591  |
| C  | -4.775758 | 0.795637  | -0.745967 |
| H  | -5.378721 | -1.225681 | -1.213519 |
| H  | -3.922188 | 2.687682  | -0.155411 |
| H  | -5.691719 | 1.241951  | -1.136733 |
| H  | -1.363492 | -1.915466 | 1.276181  |

**[1A']**

|    |           |           |           |
|----|-----------|-----------|-----------|
| C  | 0.049714  | -0.753438 | 1.702409  |
| H  | 0.728292  | -1.598259 | 1.977592  |
| C  | 0.407452  | -0.475300 | 0.212732  |
| H  | 0.107255  | -1.333753 | -0.401872 |
| O  | -1.249647 | -1.011698 | 1.897776  |
| C  | 1.863129  | -0.161318 | -0.008417 |
| C  | 2.664503  | -1.031838 | -0.755705 |
| C  | 2.452640  | 0.968744  | 0.574935  |
| C  | 4.026437  | -0.782271 | -0.915928 |
| H  | 2.213151  | -1.914866 | -1.213509 |
| C  | 3.813011  | 1.221919  | 0.409234  |
| H  | 1.840955  | 1.659890  | 1.160087  |
| C  | 4.603758  | 0.346083  | -0.334548 |
| H  | 4.638682  | -1.471574 | -1.499786 |
| H  | 4.257795  | 2.107863  | 0.865350  |
| H  | 5.669292  | 0.543837  | -0.461998 |
| S  | -0.585249 | 0.970414  | -0.356345 |
| C  | -2.215114 | 0.419033  | -0.416141 |
| Cl | -2.466814 | -1.281204 | -0.962937 |
| S  | -3.510182 | 1.369896  | -0.206205 |
| Li | -2.805066 | -1.398675 | 1.555980  |
| H  | 0.426508  | 0.122314  | 2.283284  |

**[1B']**

|   |          |          |          |
|---|----------|----------|----------|
| C | 0.273556 | 2.374341 | 0.010112 |
|---|----------|----------|----------|

|    |           |           |           |
|----|-----------|-----------|-----------|
| H  | -0.609117 | 3.050404  | -0.107489 |
| C  | -0.221264 | 1.262098  | 0.965032  |
| O  | 0.755801  | 1.910098  | -1.155154 |
| C  | -1.424478 | 0.465518  | 0.506206  |
| C  | -2.067877 | 0.764930  | -0.699541 |
| C  | -1.937111 | -0.562502 | 1.306379  |
| C  | -3.195234 | 0.045177  | -1.096382 |
| H  | -1.661742 | 1.547331  | -1.341346 |
| C  | -3.060603 | -1.282972 | 0.909448  |
| H  | -1.437258 | -0.811010 | 2.245984  |
| C  | -3.693578 | -0.982281 | -0.297275 |
| H  | -3.684995 | 0.287654  | -2.041348 |
| H  | -3.443521 | -2.083408 | 1.544866  |
| H  | -4.572599 | -1.547217 | -0.611874 |
| S  | 1.233257  | 0.246240  | 1.477894  |
| C  | 1.860923  | -0.567179 | 0.087840  |
| Cl | 0.674884  | -1.246179 | -1.078729 |
| S  | 3.427180  | -0.923861 | -0.093357 |
| Li | 1.187474  | 0.837061  | -2.315296 |
| H  | 1.013908  | 2.970294  | 0.591374  |
| H  | -0.459525 | 1.718182  | 1.941826  |

**[1C']**

|    |           |           |           |
|----|-----------|-----------|-----------|
| C  | -0.627039 | -0.487884 | 0.665566  |
| C  | 0.007239  | -0.926059 | -0.686648 |
| H  | -0.495844 | -1.798781 | -1.129072 |
| H  | -0.010256 | -0.103227 | -1.414705 |
| O  | 0.042170  | 0.539480  | 1.211991  |
| C  | -2.101101 | -0.193358 | 0.361156  |
| C  | -3.021697 | -1.231640 | 0.179178  |
| C  | -2.539959 | 1.125115  | 0.232528  |
| C  | -4.352838 | -0.957616 | -0.130096 |
| H  | -2.692220 | -2.268721 | 0.292993  |
| C  | -3.871297 | 1.404768  | -0.078107 |
| H  | -1.818201 | 1.926653  | 0.395100  |
| C  | -4.781774 | 0.364418  | -0.261482 |
| H  | -5.061274 | -1.777629 | -0.262291 |
| H  | -4.202588 | 2.440942  | -0.172501 |
| H  | -5.824558 | 0.581701  | -0.499260 |
| S  | 1.715272  | -1.495868 | -0.443366 |
| C  | 2.665680  | -0.088564 | -0.154469 |
| Cl | 2.134256  | 1.425898  | -0.965768 |
| S  | 4.064973  | -0.099225 | 0.656746  |
| Li | 1.119782  | 1.770034  | 1.341244  |
| H  | -0.621336 | -1.400742 | 1.308306  |

**[1D']**

|   |           |           |           |
|---|-----------|-----------|-----------|
| C | -0.572419 | -1.354163 | -0.536499 |
| C | 0.167243  | -1.501942 | 0.827510  |
| H | -0.497528 | -1.827138 | 1.641516  |
| H | 1.000057  | -2.212946 | 0.746653  |
| O | 0.246478  | -0.870883 | -1.486466 |
| C | -1.842357 | -0.522628 | -0.339386 |
| C | -1.876944 | 0.802555  | -0.776850 |
| C | -2.968683 | -1.055145 | 0.296215  |
| C | -3.014362 | 1.585466  | -0.577718 |
| H | -0.991244 | 1.198680  | -1.276363 |
| C | -4.108527 | -0.277177 | 0.495593  |
| H | -2.957076 | -2.096875 | 0.631278  |
| C | -4.133461 | 1.048263  | 0.058660  |
| H | -3.028992 | 2.621556  | -0.921941 |
| H | -4.983164 | -0.707369 | 0.987395  |

|    |           |           |           |
|----|-----------|-----------|-----------|
| H  | -5.025187 | 1.658914  | 0.211127  |
| S  | 0.805810  | 0.101828  | 1.394312  |
| C  | 2.121197  | 0.474907  | 0.346770  |
| Cl | 3.117779  | -0.922689 | -0.225428 |
| S  | 2.615582  | 1.975942  | 0.010742  |
| Li | 1.684442  | -0.676488 | -2.266713 |
| H  | -0.916645 | -2.397722 | -0.742150 |

**[2A]**

|    |           |           |           |
|----|-----------|-----------|-----------|
| C  | 0.210388  | 0.154664  | 1.461019  |
| C  | -0.442083 | 0.561389  | 0.119100  |
| H  | -0.310749 | 1.640038  | -0.032753 |
| O  | 1.528551  | -0.349446 | 1.229056  |
| S  | 0.568677  | -0.294139 | -1.147827 |
| C  | 2.025624  | -0.092086 | -0.074301 |
| Cl | 2.491037  | 1.716613  | -0.054004 |
| S  | 3.401710  | -1.143536 | -0.451258 |
| Li | 2.806731  | -1.654869 | 1.681342  |
| H  | -0.358104 | -0.647357 | 1.950204  |
| H  | 0.269735  | 1.022705  | 2.132864  |
| C  | -1.909031 | 0.216807  | 0.029629  |
| C  | -2.858028 | 1.236045  | -0.086644 |
| C  | -2.344680 | -1.114199 | 0.079492  |
| C  | -4.219467 | 0.934964  | -0.144970 |
| H  | -2.525700 | 2.275323  | -0.134201 |
| C  | -3.702376 | -1.415488 | 0.020556  |
| H  | -1.607469 | -1.918006 | 0.148042  |
| C  | -4.644393 | -0.390426 | -0.090194 |
| H  | -4.948797 | 1.741463  | -0.236424 |
| H  | -4.028661 | -2.456189 | 0.055479  |
| H  | -5.708406 | -0.627449 | -0.138396 |

**[2B]**

|    |           |           |           |
|----|-----------|-----------|-----------|
| C  | 0.258494  | 0.700058  | -1.376115 |
| C  | -0.463170 | 1.067868  | -0.065738 |
| H  | -0.538056 | 2.160045  | 0.020205  |
| O  | 1.656914  | 0.673315  | -1.124030 |
| S  | 0.683827  | 0.512412  | 1.266186  |
| C  | 1.962848  | -0.032345 | 0.064393  |
| Cl | 1.661748  | -1.833498 | -0.339458 |
| S  | 3.643296  | 0.253107  | 0.555613  |
| Li | 3.385906  | 1.390237  | -1.395568 |
| H  | 0.078077  | 1.442212  | -2.163108 |
| C  | -1.847306 | 0.468773  | 0.011380  |
| C  | -2.971501 | 1.297430  | -0.017013 |
| C  | -2.023641 | -0.919680 | 0.078392  |
| C  | -4.255975 | 0.751326  | 0.014579  |
| H  | -2.840114 | 2.381184  | -0.060891 |
| C  | -3.303913 | -1.464211 | 0.107094  |
| H  | -1.143495 | -1.567362 | 0.120838  |
| C  | -4.424234 | -0.629837 | 0.074765  |
| H  | -5.126003 | 1.409799  | -0.004584 |
| H  | -3.430053 | -2.546742 | 0.161686  |
| H  | -5.427165 | -1.058927 | 0.102423  |
| H  | -0.059510 | -0.292574 | -1.726040 |

**[2C]**

|   |           |          |           |
|---|-----------|----------|-----------|
| C | 0.354170  | 0.961974 | 0.256086  |
| C | -0.187665 | 1.381078 | -1.112096 |
| H | 0.190953  | 2.369314 | -1.401490 |
| H | 0.065211  | 0.643250 | -1.886581 |
| O | -0.583476 | 0.013661 | 0.805014  |

|    |           |           |           |
|----|-----------|-----------|-----------|
| C  | 1.739815  | 0.368974  | 0.212516  |
| C  | 2.840933  | 1.159738  | 0.549942  |
| C  | 1.938942  | -0.950724 | -0.208162 |
| C  | 4.133031  | 0.641687  | 0.460974  |
| H  | 2.685638  | 2.187767  | 0.886420  |
| C  | 3.229797  | -1.468318 | -0.289483 |
| H  | 1.073061  | -1.564129 | -0.467706 |
| C  | 4.328630  | -0.673452 | 0.042377  |
| H  | 4.988066  | 1.265842  | 0.725524  |
| H  | 3.379683  | -2.498770 | -0.615766 |
| H  | 5.338537  | -1.081429 | -0.023441 |
| S  | -1.982838 | 1.433510  | -0.857987 |
| C  | -1.827105 | -0.096579 | 0.119113  |
| Cl | -1.574071 | -1.513126 | -1.087065 |
| S  | -3.154141 | -0.426917 | 1.248601  |
| Li | -1.251256 | -0.533835 | 2.489014  |
| H  | 0.348008  | 1.841757  | 0.918579  |

**[2D]**

|    |           |           |           |
|----|-----------|-----------|-----------|
| C  | -0.300560 | -1.037008 | -0.392897 |
| C  | 0.280657  | -1.600804 | 0.920421  |
| H  | -0.514003 | -1.905989 | 1.612370  |
| H  | 0.943843  | -2.451961 | 0.718975  |
| O  | 0.589344  | -0.011184 | -0.858730 |
| C  | -1.677730 | -0.431960 | -0.246456 |
| C  | -1.839720 | 0.833391  | 0.335789  |
| C  | -2.804934 | -1.139950 | -0.671230 |
| C  | -3.115562 | 1.375114  | 0.490075  |
| H  | -0.962791 | 1.381193  | 0.694967  |
| C  | -4.080031 | -0.597728 | -0.512105 |
| H  | -2.681973 | -2.121688 | -1.134706 |
| C  | -4.237162 | 0.660833  | 0.067334  |
| H  | -3.233620 | 2.357985  | 0.949216  |
| H  | -4.953599 | -1.157828 | -0.849375 |
| H  | -5.234435 | 1.086511  | 0.188630  |
| S  | 1.240842  | -0.236453 | 1.630564  |
| C  | 1.739652  | 0.230805  | -0.062661 |
| Cl | 2.998851  | -1.002887 | -0.655657 |
| S  | 2.273440  | 1.914373  | -0.248136 |
| Li | 0.415764  | 1.727611  | -1.567858 |
| H  | -0.322103 | -1.835389 | -1.148977 |

**[TS-2A]**

|    |           |           |           |
|----|-----------|-----------|-----------|
| C  | 0.076280  | -0.054360 | 1.700951  |
| C  | -0.417636 | 0.386383  | 0.288779  |
| H  | -0.166389 | 1.441350  | 0.121169  |
| O  | 1.421738  | -0.046620 | 1.801218  |
| S  | 0.577447  | -0.599815 | -0.893304 |
| C  | 2.163189  | -0.074020 | -0.420846 |
| Cl | 2.418608  | 1.668400  | -0.353562 |
| S  | 3.492746  | -1.070648 | -0.531462 |
| Li | 2.971679  | -0.693215 | 1.840428  |
| H  | -0.379806 | -1.049538 | 1.899837  |
| H  | -0.415231 | 0.659282  | 2.399206  |
| C  | -1.886955 | 0.160931  | 0.057828  |
| C  | -2.430736 | -1.131090 | 0.070076  |
| C  | -2.742328 | 1.252620  | -0.126741 |
| C  | -3.799512 | -1.323904 | -0.103369 |
| H  | -1.774690 | -1.994005 | 0.208584  |
| C  | -4.113119 | 1.060404  | -0.293733 |
| H  | -2.326737 | 2.262548  | -0.139376 |
| C  | -4.644598 | -0.228388 | -0.283439 |

|   |           |           |           |
|---|-----------|-----------|-----------|
| H | -4.208526 | -2.335547 | -0.097299 |
| H | -4.767686 | 1.921889  | -0.435629 |
| H | -5.716797 | -0.380226 | -0.417756 |

**[TS-2B]**

|    |           |           |           |
|----|-----------|-----------|-----------|
| C  | 0.475652  | 1.572494  | -1.480036 |
| C  | -0.259316 | 1.534402  | -0.119902 |
| H  | -0.529399 | 2.559566  | 0.180714  |
| O  | 1.142177  | 0.419325  | -1.727931 |
| S  | 1.060924  | 1.139333  | 1.102714  |
| C  | 1.749055  | -0.313522 | 0.422445  |
| Cl | 0.681138  | -1.702250 | 0.260158  |
| S  | 3.391292  | -0.578552 | 0.435550  |
| Li | 2.541826  | -0.512500 | -1.883886 |
| H  | 1.132753  | 2.467956  | -1.463275 |
| H  | -0.311120 | 1.777913  | -2.239172 |
| C  | -1.497436 | 0.670009  | -0.050134 |
| C  | -2.337076 | 0.752444  | 1.066565  |
| C  | -1.845980 | -0.191728 | -1.095760 |
| C  | -3.501525 | -0.008058 | 1.140423  |
| H  | -2.069527 | 1.417418  | 1.891976  |
| C  | -3.014099 | -0.949777 | -1.024822 |
| H  | -1.173045 | -0.290869 | -1.948909 |
| C  | -3.844824 | -0.861559 | 0.091307  |
| H  | -4.144578 | 0.067083  | 2.018958  |
| H  | -3.272366 | -1.620699 | -1.846115 |
| H  | -4.757126 | -1.457954 | 0.145486  |

**[TS-2C]**

|    |           |           |           |
|----|-----------|-----------|-----------|
| C  | 0.471842  | -0.833881 | -0.545820 |
| C  | -0.060688 | -1.226152 | 0.872641  |
| H  | 0.376540  | -2.165056 | 1.239991  |
| H  | 0.130720  | -0.431373 | 1.605748  |
| O  | -0.353361 | 0.067199  | -1.134156 |
| C  | 1.892425  | -0.312233 | -0.348657 |
| C  | 2.978066  | -1.189252 | -0.279692 |
| C  | 2.110113  | 1.058520  | -0.188631 |
| C  | 4.266095  | -0.704211 | -0.050856 |
| H  | 2.814585  | -2.262143 | -0.414872 |
| C  | 3.396429  | 1.544888  | 0.040240  |
| H  | 1.251540  | 1.729406  | -0.254757 |
| C  | 4.477932  | 0.664990  | 0.110258  |
| H  | 5.108134  | -1.397310 | -0.003967 |
| H  | 3.558715  | 2.617669  | 0.161870  |
| H  | 5.485279  | 1.046516  | 0.285659  |
| S  | -1.840748 | -1.487733 | 0.720819  |
| C  | -2.275151 | 0.096326  | 0.139318  |
| Cl | -1.672529 | 1.459986  | 1.067143  |
| S  | -3.585322 | 0.324927  | -0.865146 |
| Li | -1.577276 | 0.434123  | -2.251906 |
| H  | 0.540931  | -1.786510 | -1.115725 |

**[TS-2D]**

|   |           |           |           |
|---|-----------|-----------|-----------|
| C | -0.432406 | -1.143519 | -0.655395 |
| C | 0.205697  | -1.630874 | 0.687680  |
| H | -0.529796 | -2.057619 | 1.383646  |
| H | 0.999331  | -2.365194 | 0.498135  |
| O | 0.451129  | -0.385683 | -1.338391 |
| C | -1.757287 | -0.437131 | -0.378001 |
| C | -1.793704 | 0.949542  | -0.203703 |
| C | -2.947365 | -1.162692 | -0.270105 |
| C | -2.996402 | 1.597307  | 0.077341  |

|    |           |           |           |
|----|-----------|-----------|-----------|
| H  | -0.862578 | 1.517646  | -0.276225 |
| C  | -4.152834 | -0.518349 | 0.007890  |
| H  | -2.930553 | -2.246729 | -0.415047 |
| C  | -4.179739 | 0.865447  | 0.182192  |
| H  | -3.010400 | 2.679864  | 0.217182  |
| H  | -5.075418 | -1.097122 | 0.081644  |
| H  | -5.121679 | 1.372934  | 0.397366  |
| S  | 0.915466  | -0.179353 | 1.503350  |
| C  | 2.022957  | 0.307908  | 0.255003  |
| Cl | 3.135583  | -0.935075 | -0.327062 |
| S  | 2.377535  | 1.903965  | -0.036254 |
| Li | 1.262404  | 0.903619  | -2.041531 |
| H  | -0.671575 | -2.092525 | -1.185872 |

**[3A]**

|    |           |           |           |
|----|-----------|-----------|-----------|
| C  | 0.253978  | 0.066909  | 1.021573  |
| C  | -0.388158 | -0.417788 | -0.274200 |
| H  | 0.042216  | 0.182399  | -1.094206 |
| O  | 1.683074  | -0.246742 | 1.000480  |
| S  | -0.032281 | -2.193227 | -0.578978 |
| C  | 2.563718  | 0.387623  | 0.263292  |
| Cl | 2.241841  | 2.058866  | -0.041069 |
| S  | 3.889316  | -0.379772 | -0.296614 |
| Li | 2.062261  | -2.144229 | 0.277806  |
| H  | 0.138593  | 1.145137  | 1.195375  |
| C  | -1.863671 | -0.065745 | -0.187693 |
| C  | -2.295376 | 1.197343  | -0.611143 |
| C  | -2.797460 | -0.945217 | 0.369904  |
| C  | -3.632136 | 1.573822  | -0.487248 |
| H  | -1.573076 | 1.891136  | -1.050826 |
| C  | -4.133412 | -0.568198 | 0.499882  |
| H  | -2.461087 | -1.937683 | 0.675534  |
| C  | -4.555622 | 0.690694  | 0.071516  |
| H  | -3.953965 | 2.557962  | -0.832591 |
| H  | -4.852445 | -1.266780 | 0.931785  |
| H  | -5.603516 | 0.980477  | 0.166489  |
| H  | -0.123113 | -0.495405 | 1.883531  |

**[3B]**

|    |           |           |           |
|----|-----------|-----------|-----------|
| C  | -0.902797 | 0.830373  | 1.600038  |
| C  | -0.144203 | 1.771103  | 0.664417  |
| H  | 0.256009  | 2.552371  | 1.331258  |
| O  | -1.689927 | -0.107864 | 0.801861  |
| S  | -1.281183 | 2.574911  | -0.532101 |
| C  | -1.261301 | -1.218240 | 0.247689  |
| Cl | 0.013391  | -2.046184 | 1.057108  |
| S  | -1.984897 | -1.784210 | -1.103944 |
| Li | -2.611890 | 0.748861  | -0.789863 |
| H  | -0.254873 | 0.251459  | 2.271821  |
| C  | 1.047061  | 1.025490  | 0.072047  |
| C  | 2.138187  | 0.736682  | 0.905377  |
| C  | 1.059514  | 0.533448  | -1.234565 |
| C  | 3.194382  | -0.050968 | 0.457667  |
| H  | 2.152492  | 1.129851  | 1.926245  |
| C  | 2.112017  | -0.267371 | -1.684263 |
| H  | 0.235450  | 0.800204  | -1.898361 |
| C  | 3.177585  | -0.568526 | -0.839828 |
| H  | 4.034349  | -0.264022 | 1.121476  |
| H  | 2.098778  | -0.651902 | -2.705770 |
| H  | 4.000399  | -1.192673 | -1.192608 |
| H  | -1.660572 | 1.372993  | 2.175045  |

**[3C]**

|    |           |           |           |
|----|-----------|-----------|-----------|
| C  | 0.050570  | 0.972877  | -0.579355 |
| C  | 0.719544  | 1.840253  | 0.468784  |
| H  | 0.116896  | 2.758566  | 0.538716  |
| H  | 0.664258  | 1.347843  | 1.453291  |
| O  | 0.925440  | -0.205579 | -0.847278 |
| C  | -1.384634 | 0.544002  | -0.370903 |
| C  | -2.150097 | 1.033269  | 0.689579  |
| C  | -1.967984 | -0.339425 | -1.286971 |
| C  | -3.480269 | 0.638346  | 0.835120  |
| H  | -1.710908 | 1.720971  | 1.413263  |
| C  | -3.291835 | -0.741345 | -1.134884 |
| H  | -1.374113 | -0.723107 | -2.120141 |
| C  | -4.052048 | -0.251844 | -0.071436 |
| H  | -4.069885 | 1.026723  | 1.666961  |
| H  | -3.734285 | -1.435870 | -1.850710 |
| H  | -5.090919 | -0.563375 | 0.047728  |
| S  | 2.446462  | 2.280312  | 0.040809  |
| C  | 1.262311  | -1.149814 | -0.003007 |
| Cl | 0.164427  | -1.509820 | 1.276058  |
| S  | 2.674927  | -1.955612 | -0.190132 |
| Li | 2.897124  | 0.407201  | -1.136265 |
| H  | 0.133225  | 1.485098  | -1.547472 |

**[3D]**

|    |           |           |           |
|----|-----------|-----------|-----------|
| C  | -0.131214 | 0.011718  | 0.806862  |
| C  | 0.210170  | 1.414179  | 1.285697  |
| H  | -0.520783 | 1.669410  | 2.069423  |
| H  | 1.189594  | 1.357949  | 1.788866  |
| O  | 0.764860  | -0.287710 | -0.341159 |
| C  | -1.531770 | -0.257592 | 0.309592  |
| C  | -1.850338 | -1.560524 | -0.092846 |
| C  | -2.517977 | 0.731580  | 0.276627  |
| C  | -3.135434 | -1.873362 | -0.527055 |
| H  | -1.080885 | -2.336652 | -0.062077 |
| C  | -3.808678 | 0.413471  | -0.148537 |
| H  | -2.265519 | 1.756073  | 0.551627  |
| C  | -4.119367 | -0.883576 | -0.552531 |
| H  | -3.372465 | -2.891778 | -0.838734 |
| H  | -4.573715 | 1.191141  | -0.170556 |
| H  | -5.129388 | -1.125255 | -0.887738 |
| S  | 0.242526  | 2.708039  | -0.013358 |
| C  | 2.034637  | -0.595941 | -0.243208 |
| Cl | 2.503889  | -1.471772 | 1.174235  |
| S  | 3.083846  | -0.199362 | -1.426799 |
| Li | 0.944788  | 1.297277  | -1.636565 |
| H  | 0.111674  | -0.729471 | 1.581074  |

**[TS-3A]**

|    |           |           |           |
|----|-----------|-----------|-----------|
| C  | 0.175046  | -0.619216 | -1.050881 |
| C  | -0.423293 | -0.300819 | 0.347248  |
| H  | -0.272527 | -1.183479 | 0.984952  |
| O  | 1.472553  | -0.028169 | -1.242742 |
| S  | 0.494103  | 1.055425  | 1.139653  |
| C  | 2.399948  | -0.108857 | -0.279550 |
| Cl | 2.464049  | -1.648374 | 0.541520  |
| S  | 3.717406  | 0.898932  | -0.355058 |
| Li | 1.547512  | 1.998018  | -0.721211 |
| H  | 0.256603  | -1.703068 | -1.216227 |
| H  | -0.428641 | -0.178376 | -1.852921 |
| C  | -1.923162 | -0.116576 | 0.188404  |
| C  | -2.525280 | 1.142188  | 0.102185  |

|   |           |           |           |
|---|-----------|-----------|-----------|
| C | -2.727209 | -1.256429 | 0.057946  |
| C | -3.897207 | 1.258301  | -0.120493 |
| H | -1.908064 | 2.032204  | 0.236430  |
| C | -4.098520 | -1.142293 | -0.165940 |
| H | -2.272287 | -2.247162 | 0.141099  |
| C | -4.688108 | 0.118062  | -0.258984 |
| H | -4.352979 | 2.248533  | -0.177172 |
| H | -4.709302 | -2.041839 | -0.260816 |
| H | -5.762034 | 0.210970  | -0.428719 |

**[TS-3B]**

|    |           |           |           |
|----|-----------|-----------|-----------|
| C  | 0.175046  | -0.619216 | -1.050881 |
| C  | -0.423293 | -0.300819 | 0.347248  |
| H  | -0.272527 | -1.183479 | 0.984952  |
| O  | 1.472553  | -0.028169 | -1.242742 |
| S  | 0.494103  | 1.055425  | 1.139653  |
| C  | 2.399948  | -0.108857 | -0.279550 |
| Cl | 2.464049  | -1.648374 | 0.541520  |
| S  | 3.717406  | 0.898932  | -0.355058 |
| Li | 1.547512  | 1.998018  | -0.721211 |
| H  | 0.256603  | -1.703068 | -1.216227 |
| H  | -0.428641 | -0.178376 | -1.852921 |
| C  | -1.923162 | -0.116576 | 0.188404  |
| C  | -2.525280 | 1.142188  | 0.102185  |
| C  | -2.727209 | -1.256429 | 0.057946  |
| C  | -3.897207 | 1.258301  | -0.120493 |
| H  | -1.908064 | 2.032204  | 0.236430  |
| C  | -4.098520 | -1.142293 | -0.165940 |
| H  | -2.272287 | -2.247162 | 0.141099  |
| C  | -4.688108 | 0.118062  | -0.258984 |
| H  | -4.352979 | 2.248533  | -0.177172 |
| H  | -4.709302 | -2.041839 | -0.260816 |
| H  | -5.762034 | 0.210970  | -0.428719 |

**[TS-3C]**

|    |           |           |           |
|----|-----------|-----------|-----------|
| C  | 0.153900  | -0.827745 | -0.827250 |
| C  | -0.413972 | -1.916310 | 0.102960  |
| H  | -0.065990 | -2.886378 | -0.280198 |
| H  | -0.008269 | -1.798025 | 1.117664  |
| O  | -0.788602 | 0.268307  | -0.985063 |
| C  | 1.533252  | -0.312545 | -0.469424 |
| C  | 2.486889  | -1.195657 | 0.047128  |
| C  | 1.890647  | 1.020907  | -0.694560 |
| C  | 3.777151  | -0.751871 | 0.334026  |
| H  | 2.226717  | -2.239914 | 0.228949  |
| C  | 3.178201  | 1.464061  | -0.398195 |
| H  | 1.154233  | 1.719897  | -1.094230 |
| C  | 4.126204  | 0.579580  | 0.115079  |
| H  | 4.510707  | -1.451999 | 0.736958  |
| H  | 3.440651  | 2.509296  | -0.569526 |
| H  | 5.134005  | 0.928015  | 0.346026  |
| S  | -2.225080 | -1.868554 | 0.188142  |
| C  | -1.522642 | 0.732991  | 0.032887  |
| Cl | -0.706585 | 0.851104  | 1.563143  |
| S  | -2.866596 | 1.644948  | -0.314404 |
| Li | -2.683324 | -0.450559 | -1.587413 |
| H  | 0.187716  | -1.227214 | -1.852054 |

**[TS-3D]**

|   |           |           |           |
|---|-----------|-----------|-----------|
| C | 0.236920  | -0.106795 | -0.907300 |
| C | -0.300434 | 1.290811  | -1.283941 |
| H | 0.557792  | 1.914003  | -1.572142 |



|    |           |           |           |
|----|-----------|-----------|-----------|
| H  | -0.945024 | 1.208321  | -2.169271 |
| O  | -0.518917 | -0.658100 | 0.216276  |
| C  | 1.673715  | -0.142539 | -0.437271 |
| C  | 2.247344  | 0.947881  | 0.229262  |
| C  | 2.426599  | -1.306329 | -0.617809 |
| C  | 3.555556  | 0.869658  | 0.705979  |
| H  | 1.669711  | 1.865932  | 0.367976  |
| C  | 3.735604  | -1.382518 | -0.144543 |
| H  | 1.981453  | -2.158607 | -1.136330 |
| C  | 4.301092  | -0.294620 | 0.519820  |
| H  | 3.996724  | 1.725823  | 1.218797  |
| H  | 4.316074  | -2.293682 | -0.296884 |
| H  | 5.326362  | -0.352015 | 0.888799  |
| S  | -1.261157 | 2.055457  | 0.053774  |
| C  | -1.850888 | -0.565938 | 0.274555  |
| Cl | -2.667475 | -0.792606 | -1.249059 |
| S  | -2.607004 | -0.816378 | 1.727670  |
| Li | -0.589957 | 0.651983  | 1.803055  |
| H  | 0.102717  | -0.809560 | -1.741953 |

**[TS-4A]**

|    |           |           |           |
|----|-----------|-----------|-----------|
| C  | -0.137513 | 0.757505  | 1.095284  |
| C  | 0.921825  | -0.201710 | 1.268753  |
| H  | 1.169532  | -0.166866 | 2.348840  |
| O  | -1.361130 | 0.280612  | -0.676723 |
| S  | 0.017183  | -1.825635 | 1.148058  |
| C  | -2.596054 | 0.265052  | -0.538425 |
| Cl | -3.287517 | 1.743597  | 0.184762  |
| S  | -3.604533 | -1.006810 | -0.930258 |
| Li | -1.199100 | -1.627287 | -0.823821 |
| H  | -0.961710 | 0.762267  | 1.812913  |
| C  | 2.163306  | 0.017924  | 0.432435  |
| C  | 2.739829  | 1.294772  | 0.403624  |
| C  | 2.768471  | -1.014403 | -0.286892 |
| C  | 3.888022  | 1.539715  | -0.345542 |
| H  | 2.290532  | 2.108797  | 0.979830  |
| C  | 3.921843  | -0.770430 | -1.033697 |
| H  | 2.323104  | -2.009210 | -0.253976 |
| C  | 4.481981  | 0.504886  | -1.069107 |
| H  | 4.322660  | 2.540473  | -0.361001 |
| H  | 4.384053  | -1.585795 | -1.592671 |
| H  | 5.382002  | 0.693741  | -1.656384 |
| H  | -0.048700 | 1.611671  | 0.423337  |

**[TS-4B]**

|    |           |           |           |
|----|-----------|-----------|-----------|
| C  | 0.571535  | -1.453275 | 1.638184  |
| C  | -0.157460 | -1.939707 | 0.497383  |
| H  | -0.601489 | -2.901212 | 0.828753  |
| O  | 1.996337  | 0.106315  | 0.870837  |
| S  | 1.188451  | -2.508477 | -0.653623 |
| C  | 1.532874  | 1.120989  | 0.324016  |
| Cl | 0.299861  | 2.000832  | 1.270121  |
| S  | 1.949586  | 1.691870  | -1.192927 |
| Li | 2.608617  | -0.658319 | -0.779360 |
| H  | 0.317390  | -0.519839 | 2.143850  |
| C  | -1.224956 | -0.991904 | -0.004278 |
| C  | -1.167470 | -0.397597 | -1.264535 |
| C  | -2.270322 | -0.654339 | 0.865334  |
| C  | -2.128208 | 0.542909  | -1.640103 |
| H  | -0.357033 | -0.669021 | -1.941637 |
| C  | -3.232157 | 0.278172  | 0.488088  |
| H  | -2.328188 | -1.123218 | 1.852187  |

|   |           |           |           |
|---|-----------|-----------|-----------|
| C | -3.158183 | 0.884765  | -0.767159 |
| H | -2.063911 | 1.013737  | -2.622261 |
| H | -4.040072 | 0.534967  | 1.175117  |
| H | -3.905981 | 1.622086  | -1.063391 |
| H | 1.282577  | -2.121568 | 2.129950  |

**[TS-4C]**

|    |           |           |           |
|----|-----------|-----------|-----------|
| C  | 0.252268  | 1.102850  | 0.592237  |
| C  | -0.279212 | 2.391459  | 0.171305  |
| H  | 0.262852  | 3.016990  | 0.926224  |
| H  | 0.129505  | 2.715884  | -0.797224 |
| O  | -1.040771 | -0.139823 | -0.701529 |
| C  | 1.537148  | 0.569021  | 0.238127  |
| C  | 2.236100  | 0.990514  | -0.912794 |
| C  | 2.117440  | -0.389178 | 1.094367  |
| C  | 3.492036  | 0.471393  | -1.185690 |
| H  | 1.780848  | 1.704955  | -1.598930 |
| C  | 3.381028  | -0.895772 | 0.821560  |
| H  | 1.565358  | -0.722701 | 1.974638  |
| C  | 4.063847  | -0.466468 | -0.317969 |
| H  | 4.031321  | 0.787626  | -2.078949 |
| H  | 3.832995  | -1.630126 | 1.488614  |
| H  | 5.052620  | -0.871966 | -0.539610 |
| S  | -2.050208 | 2.721679  | 0.383567  |
| C  | -1.565651 | -1.195790 | -0.322437 |
| Cl | -0.428828 | -2.436075 | 0.292456  |
| S  | -3.202042 | -1.543903 | -0.324704 |
| Li | -2.725657 | 0.853229  | -0.738707 |
| H  | -0.236293 | 0.658932  | 1.467796  |

**[TS-4D]**

|    |           |           |           |
|----|-----------|-----------|-----------|
| C  | -0.868387 | 0.281878  | -1.363179 |
| C  | -2.340924 | 0.257401  | -1.302354 |
| H  | -2.589892 | 1.215795  | -1.810996 |
| H  | -2.695864 | -0.531085 | -1.980200 |
| O  | -0.580476 | -1.582922 | -0.477829 |
| C  | 0.033681  | 1.138001  | -0.636854 |
| C  | -0.342853 | 1.881006  | 0.505379  |
| C  | 1.359673  | 1.235409  | -1.118787 |
| C  | 0.583679  | 2.711213  | 1.122625  |
| H  | -1.362655 | 1.788472  | 0.882105  |
| C  | 2.280608  | 2.057245  | -0.486436 |
| H  | 1.650744  | 0.660662  | -2.000139 |
| C  | 1.889994  | 2.794413  | 0.634557  |
| H  | 0.290696  | 3.290154  | 1.998995  |
| H  | 3.301113  | 2.128767  | -0.863340 |
| H  | 2.614348  | 3.439707  | 1.135025  |
| S  | -3.222575 | 0.204949  | 0.298020  |
| C  | 0.471361  | -1.747844 | 0.175613  |
| Cl | 1.917532  | -2.074577 | -0.807587 |
| S  | 0.610354  | -1.667894 | 1.831535  |
| Li | -1.775491 | -1.392273 | 1.072442  |
| H  | -0.441720 | -0.129679 | -2.283446 |

**[R5A]**

|   |           |          |           |
|---|-----------|----------|-----------|
| C | 0.176580  | 0.894357 | -0.266676 |
| C | 0.197144  | 2.402456 | 0.027807  |
| H | 0.434480  | 2.562888 | 1.092917  |
| H | 1.054347  | 2.798796 | -0.537839 |
| S | -1.307125 | 3.312098 | -0.471031 |
| C | 1.509506  | 0.226927 | -0.026114 |
| C | 2.043689  | 0.111969 | 1.262747  |

|    |           |           |           |
|----|-----------|-----------|-----------|
| C  | 2.265730  | -0.214319 | -1.116270 |
| C  | 3.309397  | -0.435837 | 1.456198  |
| H  | 1.460409  | 0.445935  | 2.124487  |
| C  | 3.534015  | -0.761247 | -0.923528 |
| H  | 1.854589  | -0.129625 | -2.124872 |
| C  | 4.058364  | -0.873626 | 0.362958  |
| H  | 3.713072  | -0.522563 | 2.466241  |
| H  | 4.112566  | -1.103161 | -1.783227 |
| H  | 5.049138  | -1.304585 | 0.515326  |
| S  | -1.153815 | 0.179402  | 0.800570  |
| C  | -1.720175 | -1.304334 | 0.061481  |
| Cl | -0.806594 | -1.882284 | -1.300022 |
| S  | -3.003650 | -2.092613 | 0.647000  |
| Li | -2.874695 | 1.946779  | 0.331548  |
| H  | -0.154488 | 0.750539  | -1.303552 |

**[R5C]**

|    |           |           |           |
|----|-----------|-----------|-----------|
| C  | 0.722098  | 0.922751  | 0.933389  |
| H  | 1.001790  | 1.598404  | 1.760242  |
| C  | -0.245007 | -0.078236 | 1.570679  |
| H  | 0.221484  | -0.713812 | 2.336852  |
| H  | -1.088939 | 0.446344  | 2.032592  |
| S  | -0.143129 | 1.966431  | -0.311852 |
| C  | 2.012512  | 0.293289  | 0.421441  |
| C  | 2.358475  | -1.045359 | 0.646658  |
| C  | 2.921853  | 1.093072  | -0.290384 |
| C  | 3.565131  | -1.569804 | 0.173265  |
| H  | 1.696732  | -1.712120 | 1.202554  |
| C  | 4.129620  | 0.578110  | -0.749147 |
| H  | 2.649415  | 2.130179  | -0.492503 |
| C  | 4.456998  | -0.761397 | -0.523267 |
| H  | 3.803388  | -2.618787 | 0.358186  |
| H  | 4.819921  | 1.225071  | -1.293672 |
| H  | 5.400187  | -1.169164 | -0.890430 |
| S  | -0.932803 | -1.223887 | 0.319717  |
| C  | -2.420609 | -0.466208 | -0.217000 |
| Cl | -3.427184 | 0.257299  | 0.982158  |
| S  | -2.915195 | -0.623039 | -1.768799 |
| Li | -0.463418 | 0.243468  | -1.776449 |

**[S5A]**

|    |           |           |           |
|----|-----------|-----------|-----------|
| C  | 0.357001  | -0.200177 | 0.700320  |
| C  | -0.132695 | 1.093911  | 1.358672  |
| H  | -1.085137 | 0.865814  | 1.861107  |
| H  | 0.588873  | 1.308036  | 2.164503  |
| S  | -0.335379 | 2.598354  | 0.331044  |
| C  | 1.809198  | -0.275687 | 0.271828  |
| C  | 2.372418  | -1.536522 | 0.027927  |
| C  | 2.605956  | 0.865448  | 0.131274  |
| C  | 3.706824  | -1.658190 | -0.347860 |
| H  | 1.755353  | -2.432400 | 0.138532  |
| C  | 3.945565  | 0.739398  | -0.240835 |
| H  | 2.165514  | 1.850204  | 0.296477  |
| C  | 4.498330  | -0.516317 | -0.483140 |
| H  | 4.132150  | -2.646460 | -0.529746 |
| H  | 4.559259  | 1.635809  | -0.344050 |
| H  | 5.545535  | -0.607804 | -0.776252 |
| S  | -0.620203 | -0.580170 | -0.841899 |
| C  | -2.282668 | -0.607882 | -0.286955 |
| Cl | -2.594495 | -1.496810 | 1.164799  |
| S  | -3.473676 | 0.102056  | -1.136939 |
| Li | -1.373047 | 1.724409  | -1.468528 |

|   |          |           |          |
|---|----------|-----------|----------|
| H | 0.152572 | -1.048390 | 1.370740 |
|---|----------|-----------|----------|

**[S5C]**

|    |           |           |           |
|----|-----------|-----------|-----------|
| C  | -0.762776 | -0.934481 | 0.048136  |
| C  | -0.030773 | -0.306995 | -1.156537 |
| H  | -0.493166 | -0.608186 | -2.109114 |
| H  | -0.034073 | 0.789761  | -1.108766 |
| S  | 0.116133  | -0.661113 | 1.633731  |
| C  | -2.169630 | -0.363307 | 0.051087  |
| C  | -3.247121 | -1.129450 | -0.402452 |
| C  | -2.404444 | 0.957157  | 0.456706  |
| C  | -4.535533 | -0.592969 | -0.447893 |
| H  | -3.076773 | -2.162132 | -0.717337 |
| C  | -3.686528 | 1.496458  | 0.404941  |
| H  | -1.566872 | 1.547052  | 0.837014  |
| C  | -4.758134 | 0.722317  | -0.047267 |
| H  | -5.367241 | -1.208241 | -0.795974 |
| H  | -3.854711 | 2.525778  | 0.726996  |
| H  | -5.764151 | 1.143932  | -0.080991 |
| S  | 1.699951  | -0.853326 | -1.285027 |
| C  | 2.600262  | 0.259791  | -0.272746 |
| Cl | 2.146212  | 1.922999  | -0.315033 |
| S  | 3.959174  | -0.236572 | 0.498749  |
| Li | 2.027755  | -1.780058 | 1.129886  |
| H  | -0.847956 | -2.013718 | -0.149017 |

**[TS-R5A]**

|    |           |           |           |
|----|-----------|-----------|-----------|
| C  | -1.720777 | 1.814959  | 0.501381  |
| C  | -0.653832 | 1.584482  | -0.455458 |
| H  | -1.455453 | 1.517567  | 1.526502  |
| H  | -0.924991 | 1.732081  | -1.507198 |
| S  | -0.959854 | -1.335467 | -1.541245 |
| C  | -0.242739 | -1.681990 | -0.061738 |
| S  | -0.967811 | -1.688972 | 1.441212  |
| Cl | 1.491446  | -2.033761 | -0.110177 |
| Li | -2.814482 | -0.915720 | -0.025187 |
| C  | 0.715815  | 1.351672  | -0.167280 |
| C  | 1.635527  | 1.336834  | -1.246696 |
| C  | 1.192117  | 1.172396  | 1.155856  |
| C  | 2.989916  | 1.190459  | -1.007276 |
| H  | 1.257083  | 1.443300  | -2.265109 |
| C  | 2.551731  | 1.028888  | 1.384515  |
| H  | 0.494211  | 1.147187  | 1.992052  |
| C  | 3.444637  | 1.042307  | 0.308665  |
| H  | 3.698065  | 1.183695  | -1.835987 |
| H  | 2.922677  | 0.894220  | 2.400593  |
| H  | 4.513274  | 0.923225  | 0.497256  |
| H  | -1.727489 | 2.933784  | 0.503559  |
| S  | -3.395015 | 1.306064  | -0.014649 |

**[TS-R5B]**

|    |           |           |           |
|----|-----------|-----------|-----------|
| C  | 0.253656  | 1.616019  | -1.031835 |
| C  | 0.541593  | 0.601262  | -0.017423 |
| H  | 0.821486  | 1.508626  | -1.962244 |
| S  | -1.034974 | -1.154146 | -0.712045 |
| C  | -2.433080 | -0.529960 | -0.050632 |
| Cl | -3.848963 | -1.575711 | -0.244798 |
| S  | -2.762409 | 0.891475  | 0.788915  |
| Li | -1.212115 | 2.771757  | 0.947188  |
| H  | -0.813387 | 1.727446  | -1.266019 |
| H  | -0.080148 | 0.579409  | 0.875820  |
| C  | 1.812497  | -0.136422 | 0.072364  |

|   |          |           |           |
|---|----------|-----------|-----------|
| C | 2.832685 | 0.005266  | -0.879003 |
| C | 1.987324 | -1.036337 | 1.134129  |
| C | 4.002210 | -0.739867 | -0.766138 |
| H | 2.725738 | 0.716838  | -1.698760 |
| C | 3.154484 | -1.784978 | 1.241488  |
| H | 1.188616 | -1.153809 | 1.870189  |
| C | 4.164710 | -1.637978 | 0.290013  |
| H | 4.793707 | -0.618639 | -1.506967 |
| H | 3.277233 | -2.485623 | 2.068480  |
| H | 5.082049 | -2.223070 | 0.372217  |
| S | 0.933443 | 2.905084  | 0.086225  |

**[TS-R5C]**

|    |           |           |           |
|----|-----------|-----------|-----------|
| C  | -1.121063 | 0.768183  | -1.001402 |
| C  | -0.055509 | -0.154864 | -1.344149 |
| H  | 0.781996  | 0.217936  | -1.938094 |
| H  | -0.245414 | -1.227469 | -1.385392 |
| S  | 1.443117  | -1.323173 | 0.415277  |
| C  | 2.835113  | -0.355456 | 0.233831  |
| S  | 3.248261  | 0.917654  | 1.193919  |
| Cl | 3.853308  | -0.740628 | -1.145117 |
| Li | 0.881355  | 0.559045  | 1.782239  |
| C  | -2.396159 | 0.189438  | -0.460161 |
| C  | -3.621659 | 0.766512  | -0.805497 |
| C  | -2.386063 | -0.905179 | 0.413222  |
| C  | -4.814858 | 0.259587  | -0.291697 |
| H  | -3.639448 | 1.624065  | -1.481987 |
| C  | -3.577348 | -1.415069 | 0.924066  |
| H  | -1.436913 | -1.364791 | 0.702566  |
| C  | -4.796418 | -0.833261 | 0.573286  |
| H  | -5.763652 | 0.720579  | -0.571141 |
| H  | -3.553944 | -2.271223 | 1.600335  |
| H  | -5.729517 | -1.232333 | 0.973832  |
| H  | -1.316656 | 1.421850  | -1.866367 |
| S  | -0.169063 | 1.849617  | 0.180649  |

**[TS-R5D]**

|    |           |           |           |
|----|-----------|-----------|-----------|
| C  | -1.273483 | 0.957008  | -0.799280 |
| C  | 0.104063  | 0.880018  | -0.335098 |
| H  | 0.857092  | 1.429328  | -0.894517 |
| H  | 0.280681  | 0.584408  | 0.698026  |
| S  | 1.462191  | -0.984486 | -0.852039 |
| C  | 2.798626  | -0.361331 | -0.049287 |
| Cl | 4.210953  | -1.417349 | -0.110512 |
| S  | 3.046056  | 1.070283  | 0.793866  |
| Li | 1.028564  | 2.548853  | 0.903223  |
| C  | -2.290656 | -0.016632 | -0.284545 |
| C  | -1.949518 | -1.095557 | 0.535475  |
| C  | -3.631901 | 0.164351  | -0.647122 |
| C  | -2.935102 | -1.972629 | 0.993109  |
| H  | -0.907788 | -1.276167 | 0.807261  |
| C  | -4.612804 | -0.709860 | -0.192006 |
| H  | -3.902807 | 1.010266  | -1.283284 |
| C  | -4.266456 | -1.782418 | 0.633410  |
| H  | -2.654092 | -2.813078 | 1.629775  |
| H  | -5.653760 | -0.555331 | -0.480682 |
| H  | -5.034908 | -2.469545 | 0.990993  |
| H  | -1.365725 | 1.133067  | -1.876954 |
| S  | -1.254947 | 2.603436  | 0.086329  |

**[R2a]**

|   |           |           |           |
|---|-----------|-----------|-----------|
| C | -0.211798 | -1.204693 | -0.608040 |
|---|-----------|-----------|-----------|

|   |           |           |           |
|---|-----------|-----------|-----------|
| H | -0.514318 | -2.020356 | -1.280049 |
| C | 0.404457  | -1.828383 | 0.648187  |
| H | -0.374736 | -2.124596 | 1.363759  |
| H | 1.014166  | -2.705576 | 0.391186  |
| S | 1.154796  | -0.333790 | -1.462334 |
| C | -1.415289 | -0.328932 | -0.319698 |
| C | -2.678324 | -0.932681 | -0.306671 |
| C | -1.311917 | 1.031868  | -0.012478 |
| C | -3.817089 | -0.195753 | 0.012419  |
| H | -2.770086 | -1.993692 | -0.553015 |
| C | -2.451381 | 1.768629  | 0.308705  |
| H | -0.340533 | 1.529630  | -0.034495 |
| C | -3.705101 | 1.158929  | 0.322941  |
| H | -4.794638 | -0.680439 | 0.011925  |
| H | -2.356093 | 2.829561  | 0.544731  |
| H | -4.594653 | 1.740526  | 0.569747  |
| S | 1.473540  | -0.595070 | 1.451086  |
| C | 2.024117  | 0.176138  | -0.022952 |
| S | 3.228217  | 1.275999  | -0.060518 |

**[S2a]**

|   |           |           |           |
|---|-----------|-----------|-----------|
| C | 0.379261  | 1.434837  | 0.572093  |
| C | -0.195581 | 0.467591  | -0.457461 |
| H | -0.083950 | 0.896706  | -1.463427 |
| S | 2.188275  | 1.472802  | 0.381442  |
| C | -1.647090 | 0.130004  | -0.209127 |
| C | -2.620457 | 0.548834  | -1.120417 |
| C | -2.042500 | -0.565592 | 0.940847  |
| C | -3.969850 | 0.283949  | -0.885406 |
| H | -2.318138 | 1.086189  | -2.022066 |
| C | -3.389110 | -0.830321 | 1.174625  |
| H | -1.288233 | -0.913371 | 1.650907  |
| C | -4.356442 | -0.404837 | 0.262281  |
| H | -4.719936 | 0.615429  | -1.605054 |
| H | -3.685263 | -1.375820 | 2.071964  |
| H | -5.411195 | -0.615378 | 0.445795  |
| S | 0.867936  | -1.035493 | -0.407758 |
| C | 2.377957  | -0.218547 | -0.052659 |
| S | 3.829002  | -0.958351 | -0.125759 |
| H | 0.135327  | 1.117394  | 1.596081  |
| H | -0.009147 | 2.450029  | 0.410332  |

**[TS-R6A]**

|    |           |           |           |
|----|-----------|-----------|-----------|
| C  | 0.307757  | 2.230453  | 0.624938  |
| C  | -0.224056 | 0.965505  | 1.305839  |
| S  | 1.179288  | -0.189418 | 1.578295  |
| C  | 1.810321  | -0.622347 | -0.002514 |
| Cl | 0.592919  | -1.501027 | -1.106413 |
| S  | 3.373281  | -0.918627 | -0.261220 |
| Li | -0.503935 | 0.444927  | -1.812751 |
| H  | 1.079681  | 2.664371  | 1.275102  |
| S  | 1.031424  | 1.928775  | -1.015761 |
| H  | -0.472818 | 1.208664  | 2.354353  |
| H  | -0.508269 | 2.969332  | 0.575876  |
| C  | -1.460286 | 0.337617  | 0.680285  |
| C  | -1.893640 | -0.934249 | 1.080354  |
| C  | -2.220421 | 1.025618  | -0.278834 |
| C  | -3.026617 | -1.514749 | 0.519617  |
| H  | -1.312887 | -1.485752 | 1.822259  |
| C  | -3.350740 | 0.433487  | -0.856449 |
| H  | -1.936408 | 2.035026  | -0.584640 |
| C  | -3.753436 | -0.840343 | -0.463593 |

|   |           |           |           |
|---|-----------|-----------|-----------|
| H | -3.338867 | -2.508645 | 0.844010  |
| H | -3.921873 | 0.984563  | -1.605811 |
| H | -4.633564 | -1.302493 | -0.912778 |

**[TS-R6C]**

|    |           |           |           |
|----|-----------|-----------|-----------|
| C  | -0.646436 | 1.243052  | 0.224156  |
| C  | 0.093801  | 1.160060  | -1.128011 |
| H  | 0.903163  | 1.900738  | -1.193928 |
| S  | 0.791851  | -0.480296 | -1.431882 |
| C  | 2.030708  | -0.594685 | -0.214398 |
| Cl | 3.262596  | 0.910133  | -0.336302 |
| S  | 2.635740  | -1.957977 | 0.384119  |
| Li | 2.318364  | 1.949958  | 1.470159  |
| H  | -0.891115 | 2.308849  | 0.352665  |
| S  | 0.429964  | 0.710898  | 1.596835  |
| C  | -1.956341 | 0.476734  | 0.173313  |
| C  | -3.122114 | 1.143134  | -0.221415 |
| C  | -2.026413 | -0.893462 | 0.451008  |
| C  | -4.332663 | 0.460331  | -0.339389 |
| H  | -3.081968 | 2.214987  | -0.434038 |
| C  | -3.234059 | -1.578581 | 0.327660  |
| H  | -1.124882 | -1.414974 | 0.777721  |
| C  | -4.390764 | -0.905541 | -0.067184 |
| H  | -5.233153 | 0.999010  | -0.639950 |
| H  | -3.272219 | -2.647002 | 0.547448  |
| H  | -5.336128 | -1.443535 | -0.156038 |
| H  | -0.598103 | 1.331536  | -1.966817 |

**[TS-S6A]**

|    |           |           |           |
|----|-----------|-----------|-----------|
| C  | 0.126717  | -1.713371 | 0.457168  |
| C  | 0.499971  | -0.382151 | -0.213021 |
| S  | -0.409051 | 0.999419  | 0.582042  |
| C  | -2.066133 | 0.684015  | 0.164458  |
| Cl | -2.272660 | 0.442488  | -1.750063 |
| S  | -3.356887 | 1.226993  | 0.952697  |
| Li | -2.479546 | -1.840042 | -1.522393 |
| H  | 0.539401  | -1.723773 | 1.476269  |
| S  | -1.657010 | -2.029382 | 0.569515  |
| H  | 0.197461  | -0.384213 | -1.269159 |
| H  | 0.638270  | -2.510411 | -0.105949 |
| C  | 1.977907  | -0.076283 | -0.124578 |
| C  | 2.741198  | 0.046280  | -1.289818 |
| C  | 2.608696  | 0.064820  | 1.118776  |
| C  | 4.110771  | 0.298040  | -1.217290 |
| H  | 2.256100  | -0.056580 | -2.263163 |
| C  | 3.975847  | 0.322221  | 1.191221  |
| H  | 2.024051  | -0.020250 | 2.038342  |
| C  | 4.730868  | 0.436724  | 0.023386  |
| H  | 4.694350  | 0.388690  | -2.134872 |
| H  | 4.454278  | 0.433955  | 2.165502  |
| H  | 5.802057  | 0.636158  | 0.081412  |

**[TS-S6C]**

|    |           |           |           |
|----|-----------|-----------|-----------|
| C  | -0.604431 | -1.156297 | -0.157533 |
| C  | 0.202754  | -0.768084 | -1.421073 |
| H  | 0.043872  | 0.273807  | -1.720720 |
| S  | 1.983111  | -1.019358 | -1.273375 |
| C  | 2.424331  | 0.118943  | -0.029899 |
| Cl | 1.586789  | 1.812962  | -0.245693 |
| S  | 3.799520  | 0.083459  | 0.802822  |
| Li | -0.193976 | 1.397384  | 1.305567  |
| H  | -0.761017 | -2.242836 | -0.193660 |

|   |           |           |           |
|---|-----------|-----------|-----------|
| S | 0.268239  | -0.819720 | 1.427550  |
| C | -1.963254 | -0.482558 | -0.147304 |
| C | -3.095409 | -1.203144 | 0.251326  |
| C | -2.120319 | 0.883251  | -0.440154 |
| C | -4.337747 | -0.582681 | 0.367127  |
| H | -2.991437 | -2.264291 | 0.487922  |
| C | -3.363246 | 1.508096  | -0.319220 |
| H | -1.272594 | 1.475748  | -0.803057 |
| C | -4.477906 | 0.777021  | 0.088079  |
| H | -5.204600 | -1.166711 | 0.681352  |
| H | -3.460715 | 2.568563  | -0.559122 |
| H | -5.450696 | 1.261759  | 0.180450  |
| H | -0.098878 | -1.395904 | -2.273117 |

**[4-R]**

|   |           |           |           |
|---|-----------|-----------|-----------|
| C | -1.225862 | 0.743447  | 0.136270  |
| C | -2.152077 | 0.082838  | 1.088194  |
| S | -2.512082 | -0.293043 | -0.641993 |
| H | -1.384549 | 1.813670  | -0.021982 |
| H | -2.892105 | 0.702091  | 1.601907  |
| H | -1.752499 | -0.744569 | 1.682297  |
| C | 0.205154  | 0.325524  | 0.045297  |
| C | 1.194564  | 1.304309  | -0.087704 |
| C | 0.587607  | -1.020179 | 0.120250  |
| C | 2.543247  | 0.949256  | -0.134463 |
| H | 0.904816  | 2.355427  | -0.153110 |
| C | 1.932582  | -1.374004 | 0.076389  |
| H | -0.181942 | -1.792948 | 0.188729  |
| C | 2.916241  | -0.390112 | -0.049781 |
| H | 3.303852  | 1.724809  | -0.239116 |
| H | 2.216882  | -2.426058 | 0.134099  |
| H | 3.970120  | -0.670204 | -0.087649 |

**[4-S]**

|   |           |           |           |
|---|-----------|-----------|-----------|
| C | 1.225862  | 0.743447  | 0.136270  |
| C | 2.152077  | 0.082838  | 1.088194  |
| S | 2.512082  | -0.293043 | -0.641993 |
| H | 1.752499  | -0.744569 | 1.682297  |
| H | 2.892105  | 0.702091  | 1.601907  |
| C | -0.205154 | 0.325524  | 0.045297  |
| C | -1.194564 | 1.304309  | -0.087704 |
| C | -0.587607 | -1.020179 | 0.120250  |
| C | -2.543247 | 0.949256  | -0.134463 |
| H | -0.904816 | 2.355427  | -0.153110 |
| C | -1.932582 | -1.374004 | 0.076389  |
| H | 0.181942  | -1.792948 | 0.188729  |
| C | -2.916241 | -0.390112 | -0.049781 |
| H | -3.303852 | 1.724809  | -0.239116 |
| H | -2.216882 | -2.426058 | 0.134099  |
| H | -3.970120 | -0.670204 | -0.087649 |
| H | 1.384549  | 1.813670  | -0.021982 |

**[TS-S5A]**

|    |           |           |           |
|----|-----------|-----------|-----------|
| C  | 2.766937  | 0.412956  | 1.130685  |
| C  | 1.386189  | -0.013700 | 1.377930  |
| H  | 3.045312  | 1.203777  | 1.837291  |
| H  | 0.857756  | 0.459304  | 2.211139  |
| S  | -0.444539 | 2.271175  | 0.591384  |
| C  | -1.401069 | 1.240810  | -0.336524 |
| S  | -0.994687 | 0.519214  | -1.778329 |
| Cl | -2.998643 | 0.858423  | 0.330331  |
| Li | 1.074217  | 1.749673  | -1.239214 |



|   |           |           |           |
|---|-----------|-----------|-----------|
| C | 0.683270  | -1.073752 | 0.756304  |
| C | -0.605081 | -1.391315 | 1.258961  |
| C | 1.223844  | -1.847143 | -0.305927 |
| C | -1.314022 | -2.464470 | 0.745997  |
| H | -1.035015 | -0.769906 | 2.048324  |
| C | 0.516446  | -2.931493 | -0.794565 |
| H | 2.183171  | -1.554232 | -0.736552 |
| C | -0.747590 | -3.236277 | -0.272959 |
| H | -2.308327 | -2.698850 | 1.126118  |
| H | 0.931655  | -3.532921 | -1.603464 |
| H | -1.307572 | -4.079137 | -0.682444 |
| H | 3.408400  | -0.463948 | 1.337566  |
| S | 3.122060  | 0.923362  | -0.612765 |

**[TS-S5B]**

|    |           |           |           |
|----|-----------|-----------|-----------|
| C  | 0.253506  | 1.615823  | 1.031745  |
| C  | 0.541527  | 0.601107  | 0.017306  |
| H  | -0.813551 | 1.727300  | 1.265815  |
| S  | -1.035021 | -1.154220 | 0.711950  |
| C  | -2.433127 | -0.529922 | 0.050621  |
| Cl | -3.849001 | -1.575691 | 0.244714  |
| S  | -2.762510 | 0.891650  | -0.788673 |
| Li | -1.211704 | 2.771541  | -0.948026 |
| H  | 0.821261  | 1.508305  | 1.962184  |
| H  | -0.080096 | 0.579283  | -0.876023 |
| C  | 1.812457  | -0.136563 | -0.072347 |
| C  | 1.987424  | -1.036506 | -1.134063 |
| C  | 2.832626  | 0.005344  | 0.879008  |
| C  | 3.154716  | -1.784946 | -1.241399 |
| H  | 1.188734  | -1.154147 | -1.870117 |
| C  | 4.002281  | -0.739588 | 0.766166  |
| H  | 2.725568  | 0.716957  | 1.698715  |
| C  | 4.164933  | -1.637710 | -0.289952 |
| H  | 3.277580  | -2.485608 | -2.068360 |
| H  | 4.793770  | -0.618174 | 1.506972  |
| H  | 5.082392  | -2.222613 | -0.372162 |
| S  | 0.933432  | 2.904981  | -0.086127 |

**[TS-S5C]**

|    |           |           |           |
|----|-----------|-----------|-----------|
| C  | 1.101209  | 1.523106  | -0.705476 |
| C  | -0.142659 | 1.342082  | -1.428148 |
| H  | -0.456332 | 0.355936  | -1.779760 |
| H  | -0.536384 | 2.199967  | -1.976114 |
| S  | -2.457843 | 1.095259  | -0.364596 |
| C  | -2.285690 | -0.526270 | 0.103599  |
| S  | -2.107379 | -1.088652 | 1.652318  |
| Cl | -2.225391 | -1.695481 | -1.216638 |
| Li | -1.304777 | 1.254607  | 1.734868  |
| C  | 1.939148  | 0.323022  | -0.370729 |
| C  | 3.328815  | 0.473373  | -0.303866 |
| C  | 1.382562  | -0.928685 | -0.088696 |
| C  | 4.145400  | -0.603342 | 0.035306  |
| H  | 3.772656  | 1.449341  | -0.514344 |
| C  | 2.198136  | -2.007233 | 0.249551  |
| H  | 0.302674  | -1.078983 | -0.129463 |
| C  | 3.582005  | -1.848614 | 0.312926  |
| H  | 5.227319  | -0.468679 | 0.081771  |
| H  | 1.744436  | -2.975894 | 0.465281  |
| H  | 4.219631  | -2.693503 | 0.577641  |
| H  | 1.699436  | 2.281878  | -1.231763 |
| S  | 0.457660  | 2.462433  | 0.784665  |

[TS-S5D]

|    |           |           |           |
|----|-----------|-----------|-----------|
| C  | 1.276773  | 1.008821  | -0.929903 |
| C  | -0.097790 | 0.929020  | -0.442997 |
| H  | -0.245925 | 0.732861  | 0.618593  |
| H  | -0.891128 | 1.352124  | -1.056061 |
| S  | -1.321625 | -1.079538 | -0.707809 |
| C  | -2.694475 | -0.456797 | 0.025428  |
| Cl | -4.036753 | -1.601595 | 0.102394  |
| S  | -3.036303 | 1.045512  | 0.700969  |
| Li | -1.127169 | 2.663291  | 0.570897  |
| C  | 2.282237  | 0.083672  | -0.305243 |
| C  | 2.567602  | 0.117434  | 1.064105  |
| C  | 2.902447  | -0.878242 | -1.107544 |
| C  | 3.449971  | -0.804567 | 1.620716  |
| H  | 2.110157  | 0.891071  | 1.684608  |
| C  | 3.790294  | -1.798800 | -0.550441 |
| H  | 2.686930  | -0.907195 | -2.177997 |
| C  | 4.063544  | -1.765920 | 0.815329  |
| H  | 3.667254  | -0.768600 | 2.689552  |
| H  | 4.269689  | -2.543170 | -1.188252 |
| H  | 4.758535  | -2.484390 | 1.252836  |
| H  | 1.351744  | 1.024227  | -2.022257 |
| S  | 1.173892  | 2.742312  | -0.267604 |
