# Supplementary material for: Organocatalytic CS2 insertion into epoxides in neat conditions: a straightforward approach for the efficient synthesis of Di- and tri-thiocarbonates
Source: Royal Society of Chemistry journal article supplement (doi:10.1039/d4cc05154h), 2024-12-23
Supplement: d4cc05154h2.pdf [file d4cc05154h2.pdf]

# SUPPORTING INFORMATION

## ORGANOCATALYTIC CS<sub>2</sub> INSERTION INTO EPOXIDES IN NEAT CONDITIONS: A STRAIGHTFORWARD APPROACH FOR THE EFFICIENT SYNTHESIS OF DI- AND TRI-THIOCARBONATES

Marcos López-Aguilar,<sup>a</sup> Nicolás Ríos-Lombardía,<sup>a</sup> Miguel Gallegos,<sup>b</sup> Daniel Barrena-Espés,<sup>b</sup> Joaquín García-Álvarez,<sup>\*,a</sup> Carmen Concellón<sup>\*,a</sup> and Vicente del Amo<sup>\*,a</sup>

---

<sup>a</sup>Laboratorio de Química Sintética Sostenible (QuimSinSos), Departamento de Química Orgánica e Inorgánica, (IUQOEM), Centro de Innovación en Química Avanzada (ORFEO-CINQA), Facultad de Química, Universidad de Oviedo, E33071 Oviedo, Spain.

<sup>b</sup> Departamento de Química Física y Analítica. Facultad de Química, Universidad de Oviedo E33071 Oviedo (Spain).

---

### TABLE OF CONTENTS:

|                                                                                     |       |
|-------------------------------------------------------------------------------------|-------|
| 1. General considerations.....                                                      | SI_2  |
| 2. Optimisation of the experimental procedures.....                                 | SI_4  |
| 3. Experimental procedures.....                                                     | SI_14 |
| 4. E-factor calculation.....                                                        | SI_16 |
| 5. Characterisation of cyclic trithiocarbonates 2a-j and dithiocarbonates 4h-k..... | SI_20 |
| 6. Synthesis and characterisation of bis-thioester 3.....                           | SI_48 |
| 7. HPLC analysis for determination of enantiomeric excess.....                      | SI_53 |
| 8. X-Ray analysis.....                                                              | SI_55 |
| 9. IR analysis.....                                                                 | SI_58 |

## 1. GENERAL CONSIDERATIONS:

All commercially available reagents and solvents were used without further purification excepting cyclohexene oxide **1e**, which was distilled under reduced pressure. Choline chloride (*ChCl*) and tetrabutylammonium chloride (TBACl) were dried under high vacuum before being used.  $\alpha$ -Methylstyrene oxide **1d** was prepared from the reaction of acetophenone and trimethylsulfoxonium oxide.<sup>[1]</sup> (1*R*\*,2*R*\*,6*S*\*)-7-Oxabicyclo[4.1.0]heptan-2-ol (**1f**) was obtained upon reaction of *m*CPBA with 2-cyclohexen-1-ol.<sup>[2]</sup> O-Benzyl-(1*S*\*,2*R*\*,6*S*\*)-7-oxabicyclo[4.1.0]heptan-2-ol (**1g**) was obtained by benzylation of **1f** employing benzyl bromide and sodium hydride.<sup>[3]</sup> Furfuryl glycidyl ether (**1h**) was obtained from the nucleophilic attack of furfuryl alcohol to epichlorohydrin.<sup>[4]</sup>

Flash chromatography of reaction products was carried out using Silica gel 60, particle size 400-630 micron (VWR). Analytical thin layer chromatography (TLC) was performed on DC-Alufolien Kieselgel Silica Gel 60 F254 0.2 mm plates (Merck) and compounds were visualized by UV fluorescence or using either KMnO<sub>4</sub> or vanillin stains followed by heating.

<sup>1</sup>H-NMR and proton-decoupled <sup>13</sup>C-NMR spectra were obtained using a Bruker AV-300 (<sup>1</sup>H, 300.13 MHz and <sup>13</sup>C, 75.5 MHz) spectrometer using the  $\delta$  scale (ppm) for chemical shifts. Calibration was made on the residual signal of the solvent (<sup>13</sup>C: CDCl<sub>3</sub>, 77.16 ppm; <sup>1</sup>H: CDCl<sub>3</sub>, 7.26 ppm).<sup>[5]</sup> Coupling constants (*J*-values) are given in hertz (Hz). The DEPT-135 technique was used to assign methylene (CH<sub>2</sub>) signals. Chemical shifts are reported as follows: value (description of absorption, coupling constant(s) where applicable, number of protons).

---

[1] K. Zhang, B.-H. Ren, X.-F. Liu, L.-L. Wang, M. Zhang, W.-M. Ren, X.-B. Lu, W.-Z. Zhang, *Angew. Chem. Int. Ed.*, 2022, **61**, e202207660.

[2] I. Fujimori, T. Mita, K. Maki, M. Shiro, A. Sato, S. Furusho, M. Kanai, M. Shibasaki, *J. Am. Chem. Soc.*, 2006, **128**, 16438.

[3] A. M. Al-Etaibi, N. A. Al-Awadi, M. R. Ibrahim, Y. A. Ibrahim, *Molecules*, 2010, **15**, 407.

[4] C. G. de Almeida, S. G. Reis, A. M. de Almeida, C. G. Diniz, V. L. da Silva, M. Le Hyaric, *Chem. Biol. Drug. Des.*, 2011, **78**, 876.

[5] H. E. Gojlieb, V. Kotlyar, A. Nudelman, *J. Org. Chem.*, 1997, **62**, 7512.

High resolution mass spectra (HRMS) experiments were carried out by ESI<sup>+</sup> using a Micro TOF Q spectrometer. IR spectra were recorded using NaCl plates or KBr pellets.

Optical rotations were measured using a Perkin-Elmer 241 polarimeter.

High-performance liquid chromatography (HPLC) analyses were carried out for the measurement of enantiomeric excesses (see Section 7), using a Hewlett Packard 1100 LC liquid chromatograph.

## 2. OPTIMISATION OF THE EXPERIMENTAL PROCEDURES:

Styrene oxide **1a** was adopted as the model substrate. It was treated with CS<sub>2</sub> and subjected to different reactions conditions. Conversion of **1a** into tri-thiocarbonate **2a**, di-thiocarbonates (**4a** and **4a'**), and mono-thiocarbonates (**5a** and **5a'**) was inferred by <sup>1</sup>H-NMR spectroscopy from crude reactions mixtures.

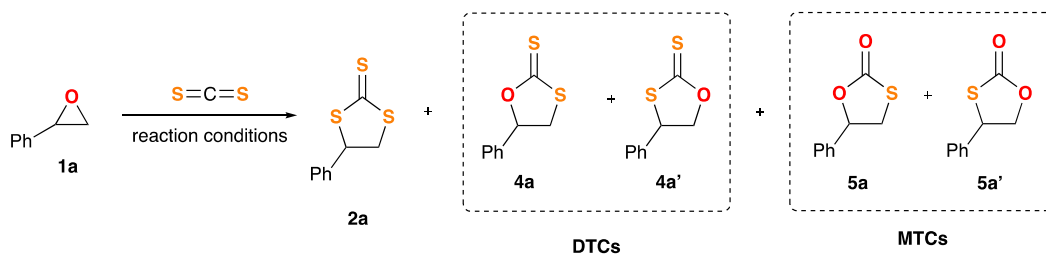

The following characteristic <sup>1</sup>H-NMR resonance signals were considered:

**2a**: 4.17 ppm (dd,  $J = 12.0, 10.3$  Hz, 1H).<sup>[6]</sup>

**4a**: 6.07 ppm (dd,  $J = 9.8, 6.7$  Hz, 1H).<sup>[7]</sup>

**4a'**: 5.23 ppm (t,  $J = 6.8$  Hz, 1H).<sup>[7]</sup>

**5a**: 3.58 ppm (dd,  $J = 11.2, 9.5$  Hz, 1H).<sup>[8]</sup>

**5a'**: 5.18 ppm (t,  $J = 7.4$  Hz, 1H).<sup>[9]</sup>

---

[6] C. Mei, X. Li, L. Liu, C. Cao, G. Pang, Y. Shi, *Tetrahedron*, 2017, **73**, 5706.

[7] J. Diebler, A. Spannenberg, T. Werner, *Org. Biomol. Chem.*, 2016,**14**, 7480.

[8] Y. Nishiyama, C. Katahira, N. Sonoda, *Tetrahedron*, 2006, **62**, 5803.

[9] W. Mahy, S. Cabezas-Hayes, G. Kociok-Köhn, C. G. Frost, *Eur. J. Org. Chem.*, 2017, **2017**, 6441.

**Table SI\_1.** Influence of temperature on the insertion of CS<sub>2</sub> into epoxide **1a**.<sup>a</sup>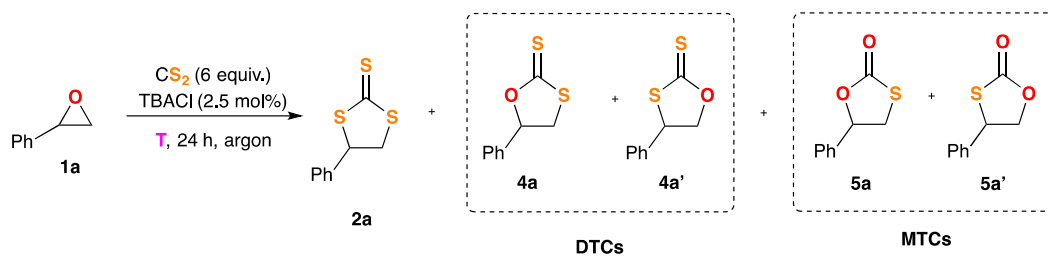

| entry | T (°C) | <b>2a</b> (%) <sup>b</sup> | <b>4a</b> (%) <sup>b</sup> | <b>4a'</b> (%) <sup>b</sup> | <b>5a</b> (%) <sup>b</sup> | <b>5a'</b> (%) <sup>b</sup> |
|-------|--------|----------------------------|----------------------------|-----------------------------|----------------------------|-----------------------------|
| 1     | 40     | 18                         | 0                          | 0                           | 0                          | 0                           |
| 2     | 50     | 66                         | 0                          | 0                           | 21                         | 0                           |
| 3     | 60     | 74                         | 1                          | 0                           | 7                          | 2                           |
| 4     | 80     | 88                         | 0                          | 0                           | 9                          | 2                           |
| 5     | 90     | 84                         | 0                          | 0                           | 8                          | 1                           |

<sup>a</sup> General conditions: styrene oxide **1a** (100  $\mu$ L, 106 mg, 0.88 mmol) was dissolved in CS<sub>2</sub> (6 equiv., 0.32 mL, 402 mg, 5.28 mmol) and treated with dry TBACl (6.0 mg, 22  $\mu$ mol). The mixture was stirred at the stated temperature for 24 h, inside a 10 mL sealed tube under an argon atmosphere. <sup>b</sup> Conversion of styrene oxide into the stated product was determined by <sup>1</sup>H NMR spectroscopy from crude reaction mixtures, using CHBr<sub>3</sub> (40  $\mu$ L, 0.457 mmol) as an analytical internal standard.

**Table SI\_2.** Influence of reaction time on the insertion of CS<sub>2</sub> into epoxide **1a**.<sup>a</sup>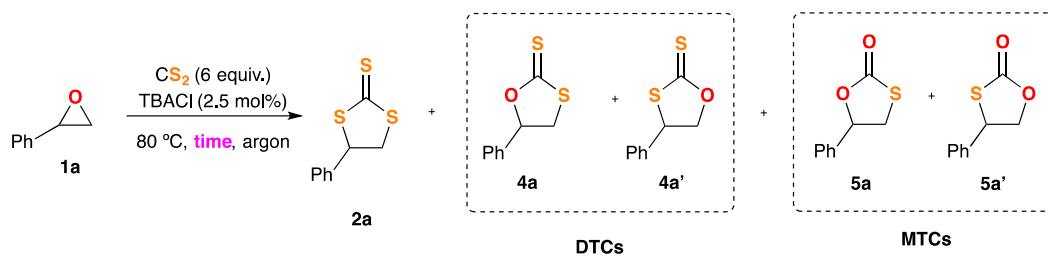

| entry | t (h) | <b>2a</b> (%) <sup>b</sup> | <b>4a</b> (%) <sup>b</sup> | <b>4a'</b> (%) <sup>b</sup> | <b>5a</b> (%) <sup>b</sup> | <b>5a'</b> (%) <sup>b</sup> |
|-------|-------|----------------------------|----------------------------|-----------------------------|----------------------------|-----------------------------|
| 1     | 6     | 76                         | 2                          | 0                           | 9                          | 2                           |
| 2     | 24    | 88                         | 0                          | 0                           | 9                          | 2                           |
| 3     | 48    | 87                         | 0                          | 0                           | 8                          | 2                           |

<sup>a</sup> General conditions: styrene oxide **1a** (100  $\mu$ L, 106 mg, 0.88 mmol) was dissolved in CS<sub>2</sub> (6 equiv., 0.32 mL, 402 mg, 5.28 mmol) and treated with dry TBACl (6.0 mg, 22  $\mu$ mol). The mixture was stirred at 80 °C for the stated time, inside a 10 mL sealed tube under an argon atmosphere. <sup>b</sup> Conversion of styrene oxide into the stated product was determined by <sup>1</sup>H NMR spectroscopy from crude reaction mixtures, using CHBr<sub>3</sub> (40  $\mu$ L, 0.457 mmol) as an analytical internal standard.

**Table SI\_3.** Influence of the equivalents of CS<sub>2</sub> on the insertion of CS<sub>2</sub> into epoxide **1a**.<sup>a</sup>

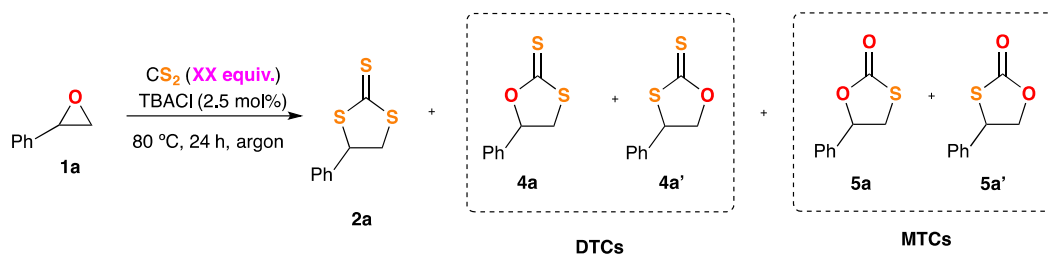

| entry | equiv. CS <sub>2</sub> | <b>2a</b> (%) <sup>b</sup> | <b>4a</b> (%) <sup>b</sup> | <b>4a'</b> (%) <sup>b</sup> | <b>5a</b> (%) <sup>b</sup> | <b>5a'</b> (%) <sup>b</sup> |
|-------|------------------------|----------------------------|----------------------------|-----------------------------|----------------------------|-----------------------------|
| 1     | 6                      | 88                         | 0                          | 0                           | 9                          | 2                           |
| 2     | 3                      | 85                         | 0                          | 0                           | 7                          | 1                           |

<sup>a</sup> General conditions: styrene oxide **1a** (100  $\mu$ L, 106 mg, 0.88 mmol) was dissolved in the indicated amount of CS<sub>2</sub> and treated with dry TBACl (6.0 mg, 22  $\mu$ mol). The mixture was stirred at 80 °C for 24 h inside a 10 mL sealed tube under an argon atmosphere. <sup>b</sup> Conversion of styrene oxide into the stated product was determined by <sup>1</sup>H NMR spectroscopy from crude reaction mixtures, using CHBr<sub>3</sub> (40  $\mu$ L, 0.457 mmol) as an analytical internal standard.

**Table SI\_4.** Influence of the nature of salts TBAX on the insertion of CS<sub>2</sub> into epoxide **1a**.<sup>a</sup>

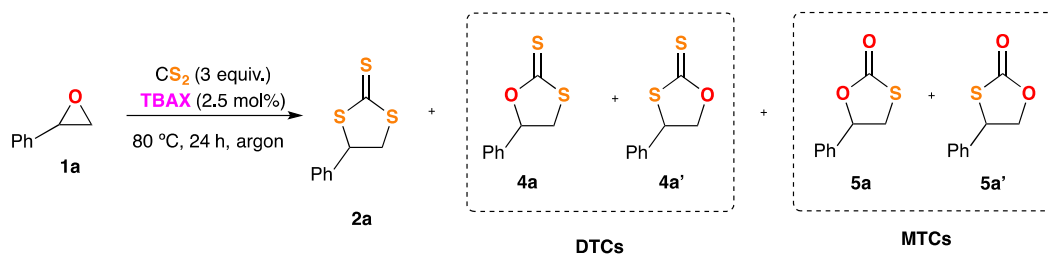

| entry          | X  | <b>2a</b> (%) <sup>b</sup> | <b>4a</b> (%) <sup>b</sup> | <b>4a'</b> (%) <sup>b</sup> | <b>5a</b> (%) <sup>b</sup> | <b>5a'</b> (%) <sup>b</sup> |
|----------------|----|----------------------------|----------------------------|-----------------------------|----------------------------|-----------------------------|
| 1 <sup>c</sup> | -- | 0                          | 0                          | 0                           | 0                          | 0                           |
| 2              | Cl | 85                         | 0                          | 0                           | 7                          | 1                           |
| 3              | Br | 72                         | 0                          | 0                           | 9                          | 0                           |
| 4              | I  | 65                         | 0                          | 0                           | 9                          | 0                           |

<sup>a</sup> General conditions: styrene oxide **1a** (100  $\mu$ L, 106 mg, 0.88 mmol) was dissolved in CS<sub>2</sub> (3 equiv., 0.16 mL, 201 mg, 2.64 mmol) and treated with the indicated dry salt TBAX (22  $\mu$ mol). The mixture was stirred at 80 °C for 24 h inside a 10 mL sealed tube under an argon atmosphere. <sup>b</sup> Conversion of styrene oxide into the stated product was determined by <sup>1</sup>H NMR spectroscopy from crude reaction mixtures, using CHBr<sub>3</sub> (40  $\mu$ L, 0.457 mmol) as an analytical internal standard. <sup>c</sup> Blank experiment without the participation of the halide catalyst.



**Table SI\_5.** Influence of the catalytic charge of TBACl on the insertion of CS<sub>2</sub> into epoxide **1a**.<sup>a</sup>

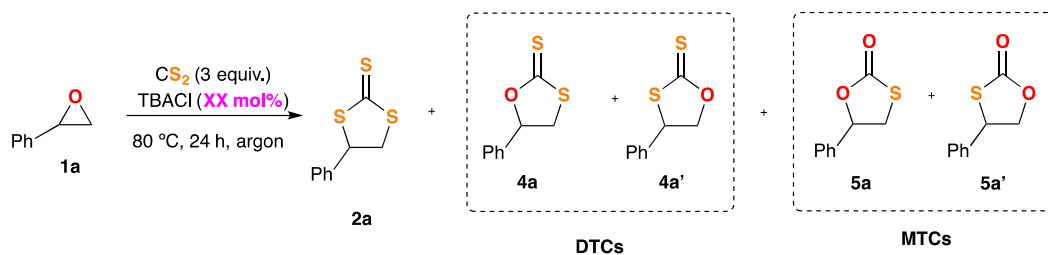

| entry | TBACl mol % | <b>2a</b> (%) <sup>b</sup> | <b>4a</b> (%) <sup>b</sup> | <b>4a'</b> (%) <sup>b</sup> | <b>5a</b> (%) <sup>b</sup> | <b>5a'</b> (%) <sup>b</sup> |
|-------|-------------|----------------------------|----------------------------|-----------------------------|----------------------------|-----------------------------|
| 1     | 1           | 88                         | 0                          | 0                           | 5                          | 1                           |
| 2     | 2.5         | 85                         | 0                          | 0                           | 7                          | 1                           |
| 3     | 5           | 89                         | 0                          | 0                           | 9                          | 1                           |

<sup>a</sup> General conditions: styrene oxide **1a** (100  $\mu$ L, 106 mg, 0.88 mmol) was dissolved in CS<sub>2</sub> (3 equiv., 0.16 mL, 201 mg, 2.64 mmol) and treated with the stated catalytic amount of dry TBACl. The mixture was stirred at 80 °C for 24 h inside a 10 mL sealed tube under an argon atmosphere. <sup>b</sup> Conversion of styrene oxide into the stated product was determined by <sup>1</sup>H NMR spectroscopy from crude reaction mixtures, using CHBr<sub>3</sub> (40  $\mu$ L, 0.457 mmol) as an analytical internal standard.

**Table SI\_6.** Influence of the nature of the cation of chloride salts of general form RCl on the insertion of CS<sub>2</sub> into epoxide **1a**.<sup>a</sup>

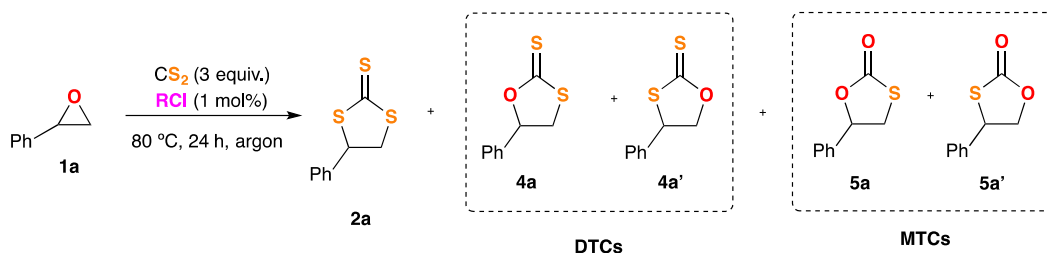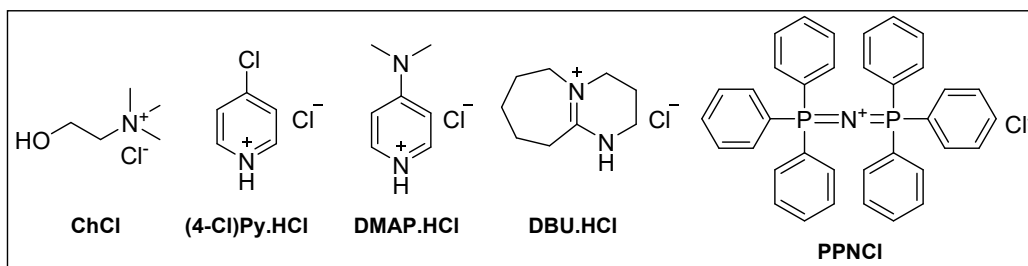

| entry | RCl                 | <b>2a</b> (%) <sup>b</sup> | <b>4a</b> (%) <sup>b</sup> | <b>4a'</b> (%) <sup>b</sup> | <b>5a</b> (%) <sup>b</sup> | <b>5a'</b> (%) <sup>b</sup> |
|-------|---------------------|----------------------------|----------------------------|-----------------------------|----------------------------|-----------------------------|
| 1     | TBACl               | 88                         | 0                          | 0                           | 5                          | 1                           |
| 2     | NaCl                | 0                          | 0                          | 0                           | 0                          | 0                           |
| 3     | LiCl                | 4                          | 17                         | 6                           | 0                          | 0                           |
| 4     | NH <sub>4</sub> Cl  | 0                          | 0                          | 0                           | 0                          | 0                           |
| 5     | NMe <sub>4</sub> Cl | 4                          | 6                          | 0                           | 0                          | 0                           |
| 6     | <i>ChCl</i>         | 51                         | 1                          | 0                           | 6                          | 2                           |
| 7     | (4-Cl)Py·HCl        | 0                          | 0                          | 0                           | 0                          | 0                           |
| 8     | DMAP·HCl            | 45                         | 0                          | 0                           | 7                          | 2                           |
| 9     | DBU·HCl             | 50                         | 0                          | 0                           | 11                         | 4                           |
| 10    | PPNCI               | 58                         | 10                         | 7                           | 0                          | 0                           |

<sup>a</sup> General conditions: styrene oxide **1a** (100 μL, 106 mg, 0.88 mmol) was dissolved in CS<sub>2</sub> (3 equiv., 0.16 mL, 201 mg, 2.64 mmol) and treated with a dry chloride salt RCl (1 mol%). The mixture was stirred at 80 °C for 24 h inside a 10 mL sealed tube under an argon atmosphere. <sup>b</sup> Conversion of styrene oxide into the stated product was determined by <sup>1</sup>H NMR spectroscopy from crude reaction mixtures, using CHBr<sub>3</sub> (40 μL, 0.457 mmol) as an analytical internal standard.

Entry 6 indicates that, upon individual optimization, the salt *ChCl* might become an optimum catalyst for the insertion of CS<sub>2</sub> into epoxide **1a**. Moreover, this salt is particularly interesting, as is rather cheap, non-toxic, and participates in the formation of most of the deep eutectic solvents reported.

**Table SI\_7.** Influence of the presence of water on the insertion of CS<sub>2</sub> into epoxide **1a**.<sup>a</sup>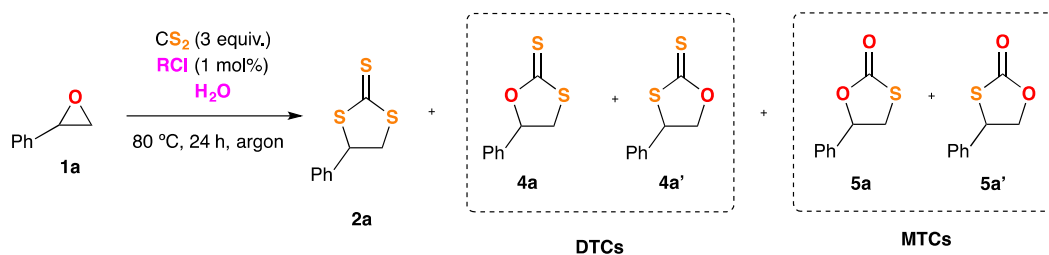

| entry | RCl         | equiv. H <sub>2</sub> O | <b>2a</b> (%) <sup>b</sup> | <b>4a</b> (%) <sup>b</sup> | <b>4a'</b> (%) <sup>b</sup> | <b>5a</b> (%) <sup>b</sup> | <b>5a'</b> (%) <sup>b</sup> |
|-------|-------------|-------------------------|----------------------------|----------------------------|-----------------------------|----------------------------|-----------------------------|
| 1     | TBACl       | --                      | 88                         | 0                          | 0                           | 5                          | 1                           |
| 2     | TBACl       | 1                       | 88                         | 0                          | 0                           | 6                          | 0                           |
| 3     | <i>ChCl</i> | --                      | 51                         | 1                          | 0                           | 6                          | 2                           |
| 4     | <i>ChCl</i> | 1                       | 55                         | 1                          | 0                           | 4                          | 1                           |

<sup>a</sup> General conditions: styrene oxide **1a** (100  $\mu$ L, 106 mg, 0.88 mmol) was dissolved in CS<sub>2</sub> (3 equiv., 0.16 mL, 201 mg, 2.64 mmol) and treated with a dry chloride salt RCl (1 mol%). In entries 2 and 4 H<sub>2</sub>O (1 equiv., 16  $\mu$ L, 16 mg, 0.88 mmol) was also added to the reaction medium. The mixtures were stirred at 80 °C for 24 h inside a 10 mL sealed tube under an argon atmosphere. <sup>b</sup> Conversion of styrene oxide into the stated product was determined by <sup>1</sup>H NMR spectroscopy from crude reaction mixtures, using CHBr<sub>3</sub> (40  $\mu$ L, 0.457 mmol) as an analytical internal standard.

Distilled water was used as an additive because the chloride salts under study (TBACl and *ChCl*) are sparingly soluble in CS<sub>2</sub>. The addition of 1 equiv. of water ensures the formation of homogeneous reaction mixtures.

**Table SI\_8.** Optimisation of *ChCl* as the catalyst for the insertion of CS<sub>2</sub> into epoxide **1a**.<sup>a</sup>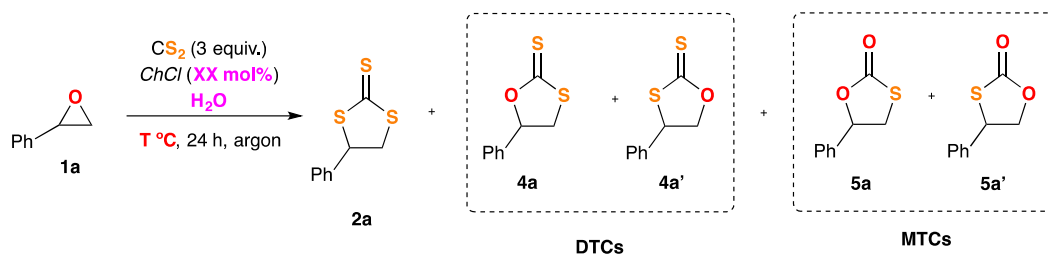

| entry | T (°C) | <i>ChCl</i> mol% | equiv.<br>H <sub>2</sub> O | <b>2a</b> (%) <sup>b</sup> | <b>4a</b> (%) <sup>b</sup> | <b>4a'</b> (%) <sup>b</sup> | <b>5a</b> (%) <sup>b</sup> | <b>5a'</b> (%) <sup>b</sup> |
|-------|--------|------------------|----------------------------|----------------------------|----------------------------|-----------------------------|----------------------------|-----------------------------|
| 1     | 80     | 1                | -                          | 51                         | 1                          | 0                           | 6                          | 2                           |
| 2     | 80     | 1                | 1                          | 55                         | 1                          | 0                           | 4                          | 1                           |
| 3     | 80     | 1                | 2                          | 66                         | 0                          | 0                           | 0                          | 0                           |
| 4     | 80     | 2.5              | 1                          | 64                         | 0                          | 0                           | 4                          | 0                           |
| 5     | 80     | 2.5              | 2                          | 78                         | 0                          | 0                           | 2                          | 0                           |
| 6     | 80     | 2.5              | 3                          | 70                         | 0                          | 0                           | 0                          | 0                           |
| 7     | 100    | 2.5              | 2                          | 93                         | 0                          | 0                           | 5                          | 0                           |
| 8     | 100    | 5                | 2                          | 78                         | 0                          | 0                           | 0                          | 0                           |
| 9     | 100    | 5                | 4                          | 75                         | 3                          | 2                           | 5                          | 0                           |

<sup>a</sup> General conditions: styrene oxide **1a** (100 μL, 106 mg, 0.88 mmol) was dissolved in CS<sub>2</sub> (3 equiv., 0.16 mL, 201 mg, 2.64 mmol) and treated with the stated catalytic amount of *ChCl* and H<sub>2</sub>O. The mixtures were stirred at 80 °C (100 °C in entries 7-9) for 24 h inside a 10 mL sealed tube under an argon atmosphere. <sup>b</sup> Conversion of styrene oxide into the stated product was determined by <sup>1</sup>H NMR spectroscopy from crude reaction mixtures, using CHBr<sub>3</sub> (40 μL, 0.457 mmol) as an analytical internal standard.

**Table SI\_9.** Optimisation of TBACl as the catalyst for the insertion of CS<sub>2</sub> into epoxide **1b**.<sup>a</sup>

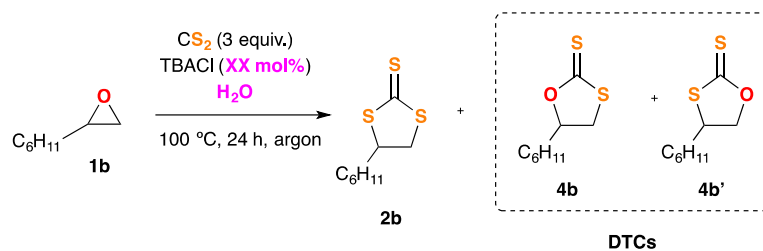

| entry          | TBACl mol % | equiv. H <sub>2</sub> O | <b>2b</b> (%) <sup>b</sup> | <b>4b</b> (%) <sup>b</sup> | <b>4b'</b> (%) <sup>b</sup> |
|----------------|-------------|-------------------------|----------------------------|----------------------------|-----------------------------|
| 1              | 2.5         | 1                       | 58                         | 31                         | 4                           |
| 2 <sup>c</sup> | 2.5         | 1                       | 0                          | 0                          | 0                           |
| 3              | 5           | 1                       | 73                         | 7                          | 7                           |
| 4              | 7.5         | 1                       | 75                         | 2                          | 7                           |
| 5              | 10          | 1                       | 79                         | 5                          | 7                           |
| 6              | 15          | 1                       | 75                         | 0                          | 2                           |
| 7              | 2.5         | 2                       | 63                         | 30                         | 4                           |
| 8              | 5           | 2                       | 71                         | 13                         | 7                           |
| 9              | 7.5         | 2                       | 77                         | 6                          | 8                           |

<sup>a</sup> General conditions: 1,2-epoxyoctane **1b** (134  $\mu\text{L}$ , 113 mg, 0.88 mmol) was dissolved in CS<sub>2</sub> (3 equiv., 0.16 mL, 201 mg, 2.64 mmol) and treated with the stated catalytic amount of TBACl and H<sub>2</sub>O. The mixtures were stirred at 100 °C for 24 h inside a 10 mL sealed tube under an argon atmosphere. <sup>b</sup> Conversion of 1,2-epoxyoctane **1b** oxide into the stated product, as determined by <sup>1</sup>H NMR spectroscopy from crude reaction mixtures, using CHBr<sub>3</sub> (40  $\mu\text{L}$ , 0.457 mmol) as an analytical internal standard. <sup>c</sup> *ChCl* was used as the catalyst.

The following characteristic <sup>1</sup>H-NMR resonance signals were considered:

**2b**: 4.43-4.34 ppm (m, 1H).<sup>[10]</sup>

**4b**: 5.14-5.05 ppm (m, 1H).<sup>[10]</sup>

Compound **4b'** displays a characteristic resonance at  $\delta = 4.72\text{-}4.60$  ppm (m, 1H). Unfortunately, it can't be separated by flash chromatography from its regioisomer **4b**.

[10] M. Okada, R. Nishiyori, S. Kaneko, K. Igawa, S. Shirakawa, *Eur. J. Org. Chem.*, 2018, **2018**, 2022.

### 3. EXPERIMENTAL PROCEDURES:

#### Standard procedure for the synthesis of TTCs or DTCs using TBACl as the catalyst (SP1)

In a 10 mL high-pressure close-capped tube are added sequentially tetrabutylammonium chloride (TBACl, 0.088 mmol, 10 mol%), the corresponding epoxide (0.88 mmol, 1 equiv.), carbon disulfide (160  $\mu$ L, 2.64 mmol, 3 equiv.) and distilled water (0.88 mmol, 1 equiv.). The resulting mixture is purged with an argon stream before the tube is sealed and it is stirred at 100 °C for 24 hours, using an oil bath. Then, the reaction vessel is allowed to reach room temperature and it is opened inside a fume hood as smelly vapors are released. The crude mixture is diluted with 10 mL of CH<sub>2</sub>Cl<sub>2</sub>, transferred into a funnel, mixed with 10 mL of brine and extracted. The aqueous phase is washed with CH<sub>2</sub>Cl<sub>2</sub> (2 x 10 mL) and the organic layers are combined, dried with MgSO<sub>4</sub> and filtered. Solvents and volatiles are removed under vacuum. For achieving analytical pure products, a flash chromatography on silica gel is performed.

In the particular case of **1a**, a greener procedure was performed and the *E*-factor value (see Section 4) calculated following the next protocol:

In a 10 mL high-pressure close-capped tube are added sequentially tetrabutylammonium chloride (TBACl, 6 mg, 0.022 mmol, 2.5 mol%), **1a** (100  $\mu$ L, 0.88 mmol, 1 equiv.), carbon disulfide (160  $\mu$ L, 2.64 mmol, 3 equiv.) and distilled water (0.88 mmol, 1 equiv.). The resulting mixture is purged with an argon stream before the tube is sealed and it is stirred at 100 °C for 24 hours, using an oil bath. Then, the reaction vessel is allowed to reach room temperature and it is opened inside a fume hood as smelly vapors are released. The crude mixture is washed with 1 mL of distilled water (stir for 30 min and then decant the aqueous phase), and finally a second treatment with 1 mL of hot distilled water (60 °C, stir for 10 min and decant the aqueous phase). Solvents and volatiles are removed under vacuum, affording **2a** (86% conversion, determined by <sup>1</sup>H-NMR using CHBr<sub>3</sub> as an internal standard) as a yellow solid.

**Standard procedure for the synthesis of TTCs or DTCs using *ChCl* as the catalyst (SP2)**

In a 10 mL high-pressure close-capped tube are added sequentially choline chloride (*ChCl*, 0.022 mmol, 2.5 mol%), the corresponding epoxide (0.88 mmol, 1 equiv.), carbon disulfide (160  $\mu$ L, 2.64 mmol, 3 equiv.) and distilled water (1.76 mmol, 2 equiv.). The resulting mixture is purged with an argon stream before the tube is sealed and it is stirred at 100 °C for 24 hours, using an oil bath. Then, the reaction vessel is allowed to reach room temperature and it is opened inside a fume hood as smelly vapors are released. The crude mixture is diluted with 10 mL of CH<sub>2</sub>Cl<sub>2</sub>, transferred into a funnel, mixed with 10 mL of brine and extracted. The aqueous phase is washed with CH<sub>2</sub>Cl<sub>2</sub> (2 x 10 mL) and the organic layers are combined, dried with MgSO<sub>4</sub> and filtered. Solvents and volatiles are removed under vacuum. For achieving analytical pure products, a flash chromatography on silica gel is performed.

#### 4. E-FACTOR CALCULATION

According to its original definition, the Sheldon *E*-factor value is defined as the quotient between total mass of waste (understanding waste as everything but the product except for water) and mass of product. *E*-factor was calculated for the insertion of CS<sub>2</sub> into epoxide **1a** according protocol described in page SI\_14.<sup>[11]</sup>

E-Factor: (mass of waste [g]) / (mass of final product [g])

Mass of waste = total amount of reactants [g] – mass of final product [g].

Amount of reactants [g]: 105.7 mg styrene oxide + 201.0 mg CS<sub>2</sub> + 6.1 mg TBACl = 0.3128 g

Mass of final product = 0.1608 g

**E- factor:** (0.3128 – 0.1608) / (0.1608) = 0.945

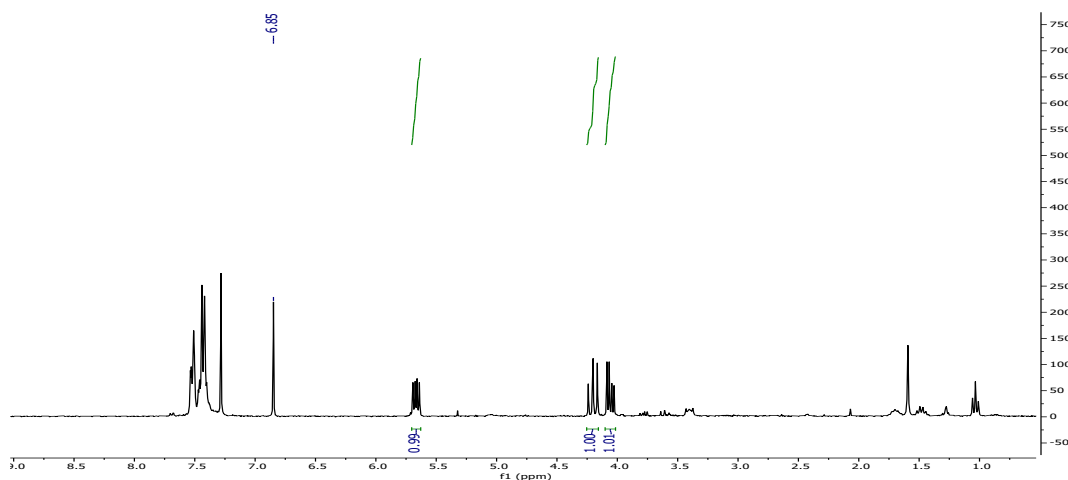

**Figure SI\_1.** <sup>1</sup>H-NMR for crude product **2a** using TBACl (2.5 mol%) as catalyst.

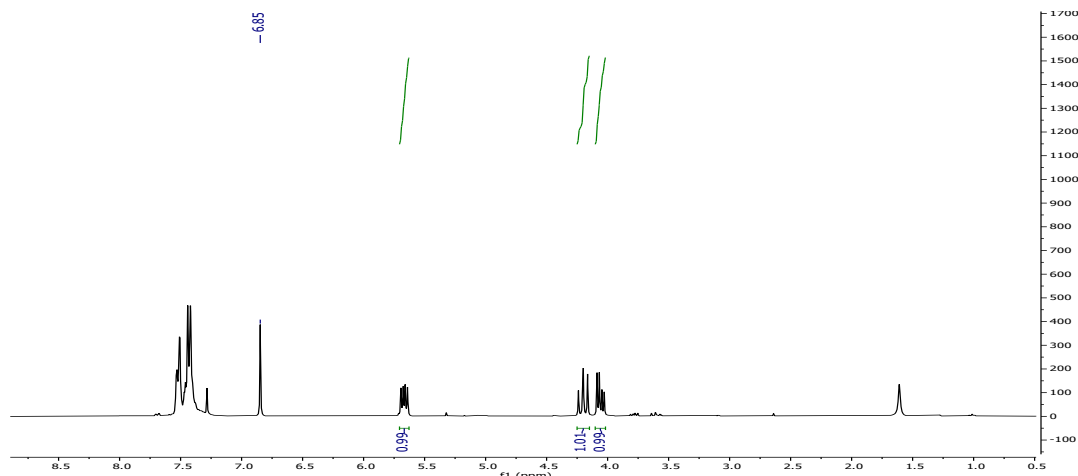

**Figure SI\_2.** <sup>1</sup>H-NMR for purified product **2a** after treatment with water (as detailed in page SI\_14)

[11] R. A. Sheldon, *Green Chem.*, 2007, **9**, 1273.



E-Factor calculation for other reactions previously described in literature without taking account the downstream process:

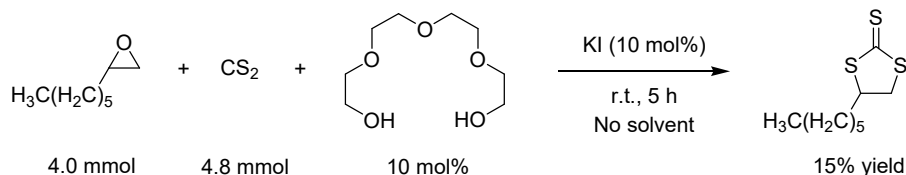

**Scheme SI\_01.** Synthesis of cyclic trithiocarbonates using KI-tetraethylene glycol complex as catalyst.<sup>[12]</sup>

E-Factor: (mass of waste [g]) / (mass of final product [g])

Mass of waste = total amount of reactants [g] – mass of final product [g].

Amount of reactants [g]: 512.8 mg 2-hexyloxirane + 365.5 mg  $\text{CS}_2$  + 77.7 mg tetraethylene glycol + 66.4 mg KI = 1.022 g

Mass of final product = 0.132 g

**E- factor:** (1.022 – 0.132) / (0.132) = 6.74

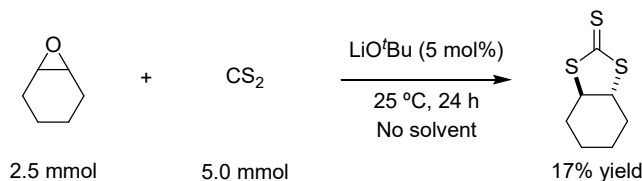

**Scheme SI\_02.** Synthesis of cyclic trithiocarbonates using LiOtBu as catalyst.<sup>[13]</sup>

E-Factor: (mass of waste [g]) / (mass of final product [g])

Mass of waste = total amount of reactants [g] – mass of final product [g].

Amount of reactants [g]: 245.4 mg cyclohexene oxide + 380.7 mg  $\text{CS}_2$  + 10.0 mg lithium *tert*-butoxide = 0.6361 g

Mass of final product = 0.0808 g

**E- factor:** (0.6361 – 0.0808) / (0.0808) = 6.87

<sup>[12]</sup> M. Okada, R. Nishiyori, S. Kaneko, K. Igawa and S. Shirakawa, *Eur. J. Org. Chem.* 2018, **2018**, 2022.

<sup>[13]</sup> J. Diebler, A. Spannenberg and T. Werner, *Org. Biomol. Chem.*, 2016, **14**, 7480.

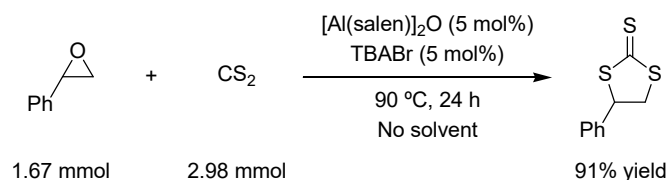

**Scheme SI\_03.** Synthesis of cyclic trithiocarbonates using a bimetallic aluminum(salen) complex as catalyst.<sup>[14]</sup>

E-Factor: (mass of waste [g]) / (mass of final product [g])

Mass of waste = total amount of reactants [g] – mass of final product [g].

Amount of reactants [g]: 200.6 mg styrene oxide + 226.9 mg CS<sub>2</sub> + 47.5 mg bimetallic aluminum(salen) complex + 26.8 mg TBABr = 0.5018 g

Mass of final product = 0.3227 g

**E- factor:** (0.5018 – 0.3227) / (0.3227) = 0.55

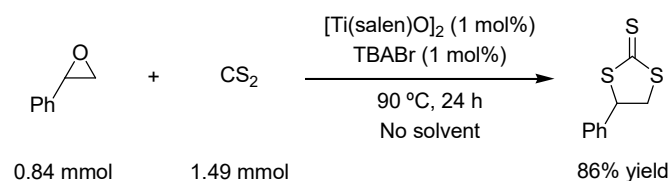

**Scheme SI\_04.** Synthesis of cyclic trithiocarbonates using a titanium(salen) catalyst.<sup>[15]</sup>

E-Factor: (mass of waste [g]) / (mass of final product [g])

Mass of waste = total amount of reactants [g] – mass of final product [g].

Amount of reactants [g]: 100.9 mg styrene oxide + 113.4 mg CS<sub>2</sub> + 10.0 mg titanium(salen) complex + 2.8 mg TBABr = 0.2271 g

Mass of final product = 0.1534 g

**E- factor:** (0.2271 – 0.1534) / (0.1534) = 0.48

<sup>[14]</sup> W. Clegg, R. W. Harrington, M. North and P. Villuendas, *J. Org. Chem.*, 2010, **75**, 6201.

<sup>[15]</sup> C. Beattie and M. North, *ChemCatChem*, 2014, **6**, 1252.

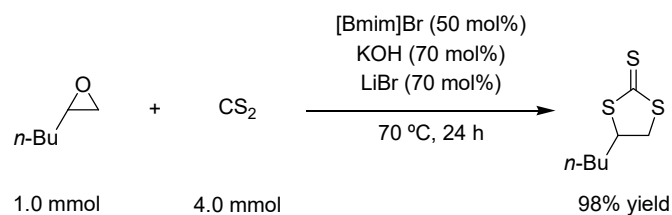

**Scheme SI\_05.** Synthesis of cyclic trithiocarbonates using N-heterocyclic carbene/LiBr complex as catalyst.<sup>[16]</sup>

E-Factor: (mass of waste [g]) / (mass of final product [g])

Mass of waste = total amount of reactants [g] – mass of final product [g].

Amount of reactants [g]: 100.2 mg 2-butyloxirane + 304.6 mg CS<sub>2</sub> + 109.6 mg [Bmim]Br + 39.3 mg KOH + 60.8 mg LiBr = 0.6145 g

Mass of final product = 0.1885 g

**E- factor:** (0.6145 – 0.1885) / (0.1885) = 2.26

<sup>[16]</sup> C. Mei, X. Li, L. Liu, C. Cao, G. Pang and Y. Shi, *Tetrahedron*, 2017, **73**, 5706.

## 5. CHARACTERISATION OF CYCLIC TRITHIOCARBONATES 2a-j AND DITHIOCARBONATES 4h-k

### 4-Phenyl-1,3-dithiolane-2-thione (2a)

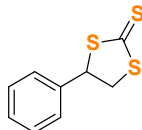

Prepared according to protocols **SP1** and **SP2**. Yellow solid (151 mg, 81% yield and 153 mg, 82% yield respectively). Purified by flash chromatography (Hexane/EtOAc, 10:1).  $^1\text{H}$  NMR (300 MHz,  $\text{CDCl}_3$ ):  $\delta$  = 7.51-7.47 (m, 2H), 7.45-7.37 (m, 3H), 5.64 (dd,  $J$  = 10.4, 5.7 Hz, 1H), 4.18 (dd,  $J$  = 12.0, 10.4 Hz, 1H), 4.03 (dd,  $J$  = 12.1, 5.7 Hz, 1H).  $^{13}\text{C}$  NMR (75 MHz,  $\text{CDCl}_3$ ):  $\delta$  = 227.5 (C), 135.2 (C), 129.3 (2 $\times$ CH), 129.3 (CH), 127.6 (2 $\times$ CH), 64.3 (CH), 49.9 ( $\text{CH}_2$ ).<sup>[6]</sup>

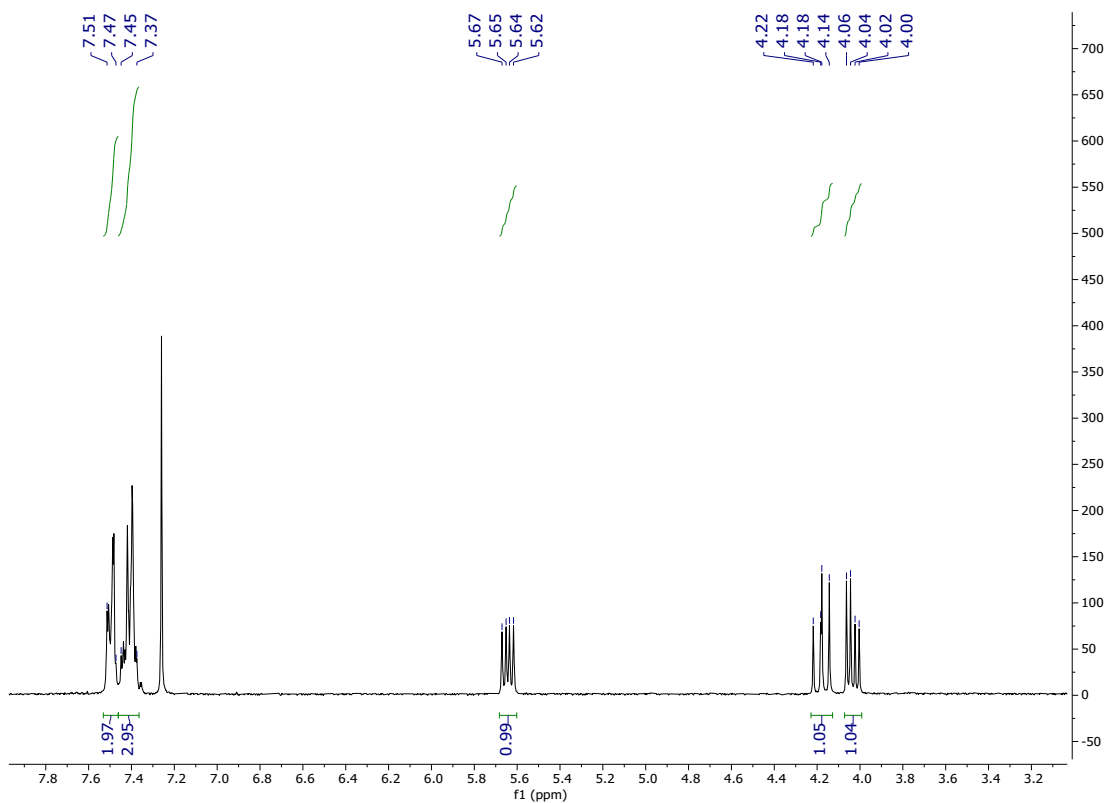

Figure SI\_3.  $^1\text{H}$ -NMR for **2a** in  $\text{CDCl}_3$  (300 MHz).

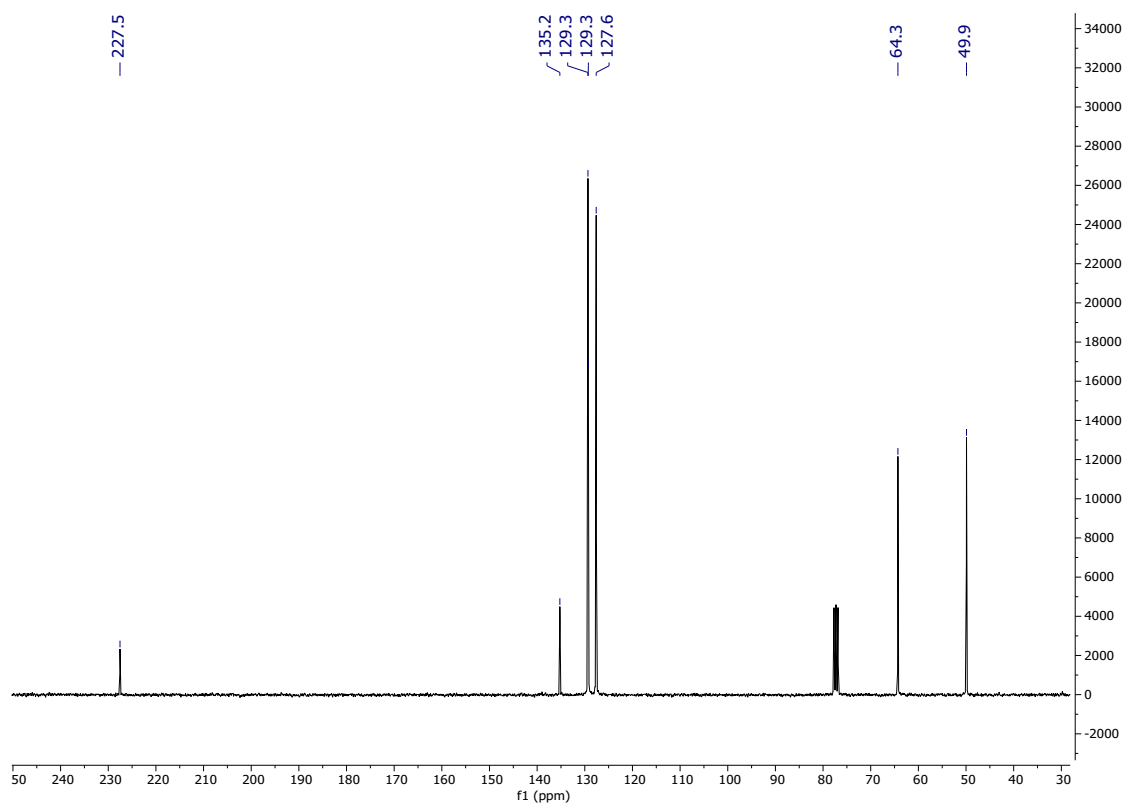

Figure SI\_4.  $^{13}\text{C}$ -NMR for **2a** in  $\text{CDCl}_3$  (75 MHz).

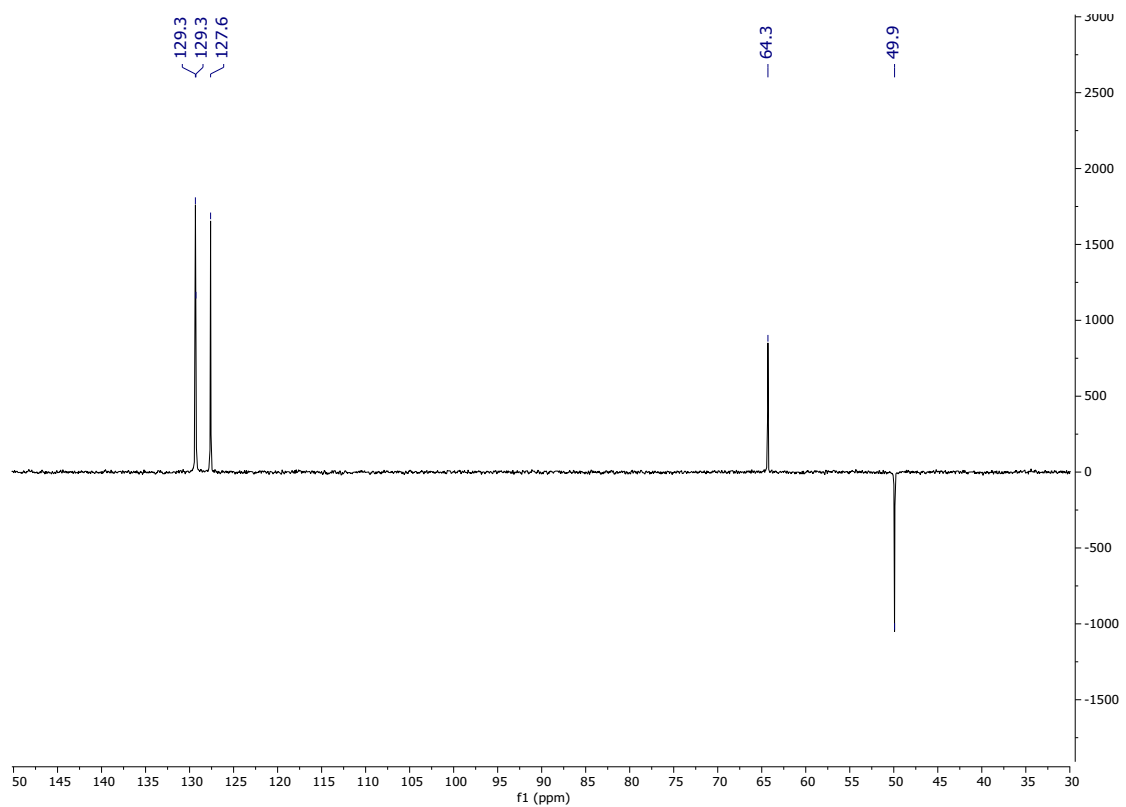

Figure SI\_5. DEPT-135 NMR for **2a** in  $\text{CDCl}_3$  (75 MHz).

#### 4-Hexyl-1,3-dithiolane-2-thione (2b)

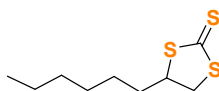

Prepared according to protocol **SP1**. Yellow oil (135 mg, 70% yield). Purified by flash chromatography (Hexane/EtOAc, 10:1).  $^1\text{H}$  NMR (300 MHz,  $\text{CDCl}_3$ ):  $\delta$  = 4.44-4.34 (m, 1H), 3.96 (dd,  $J$  = 11.9, 5.4 Hz, 1H), 3.70 (dd,  $J$  = 11.9, 7.9 Hz, 1H), 2.02-1.83 (m, 2H), 1.45-1.28 (m, 8H), 0.89 (t,  $J$  = 6.9 Hz, 3H).  $^{13}\text{C}$  NMR (75 MHz,  $\text{CDCl}_3$ ):  $\delta$  = 228.2 (C), 61.1 (CH), 48.3 ( $\text{CH}_2$ ), 33.5 ( $\text{CH}_2$ ), 31.5 ( $\text{CH}_2$ ), 28.9 ( $\text{CH}_2$ ), 28.3 ( $\text{CH}_2$ ), 22.5 ( $\text{CH}_2$ ), 14.1 ( $\text{CH}_3$ ).<sup>[10]</sup>

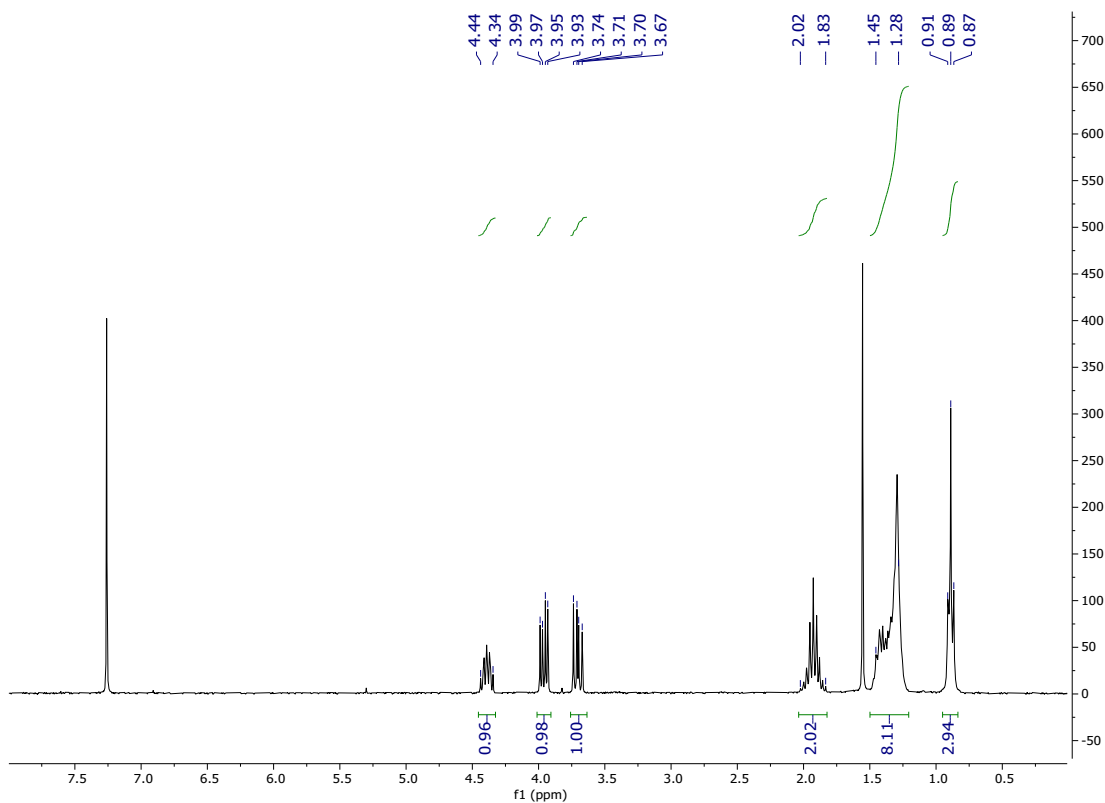

Figure SI\_6.  $^1\text{H}$ -NMR for **2b** in  $\text{CDCl}_3$  (300 MHz).

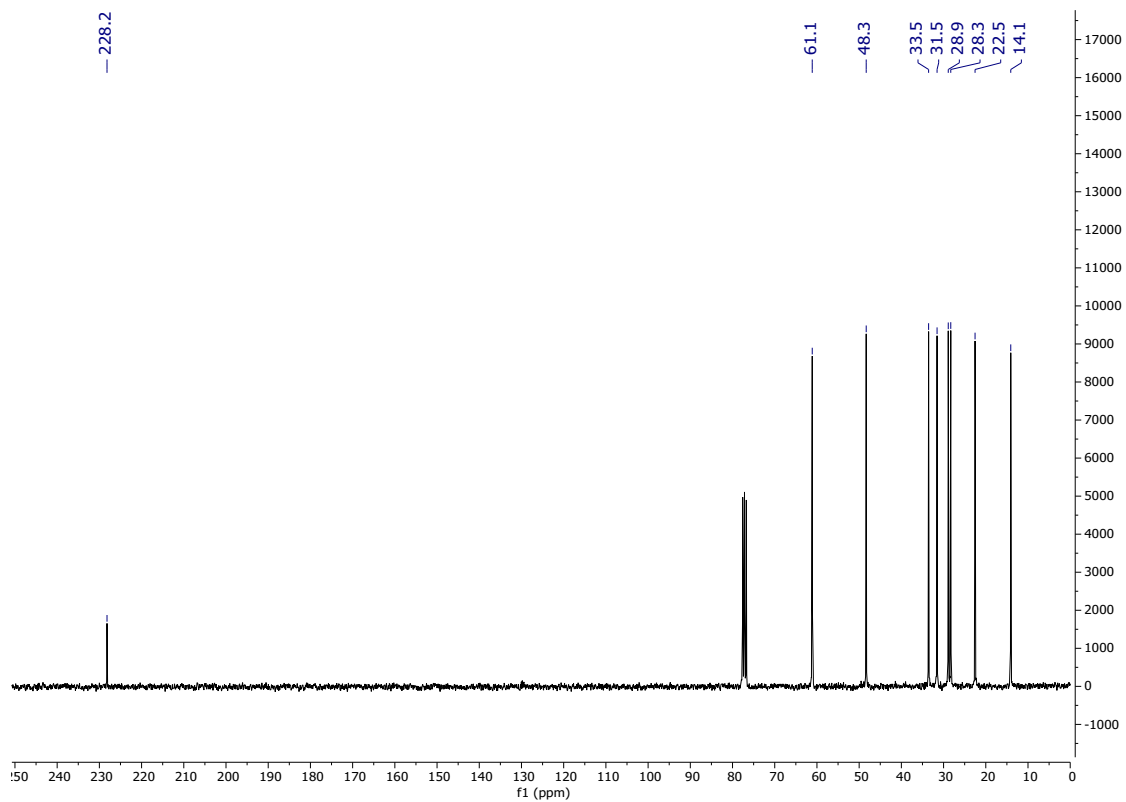

Figure SI\_7.  $^{13}\text{C}$ -NMR for **2b** in  $\text{CDCl}_3$  (75 MHz).

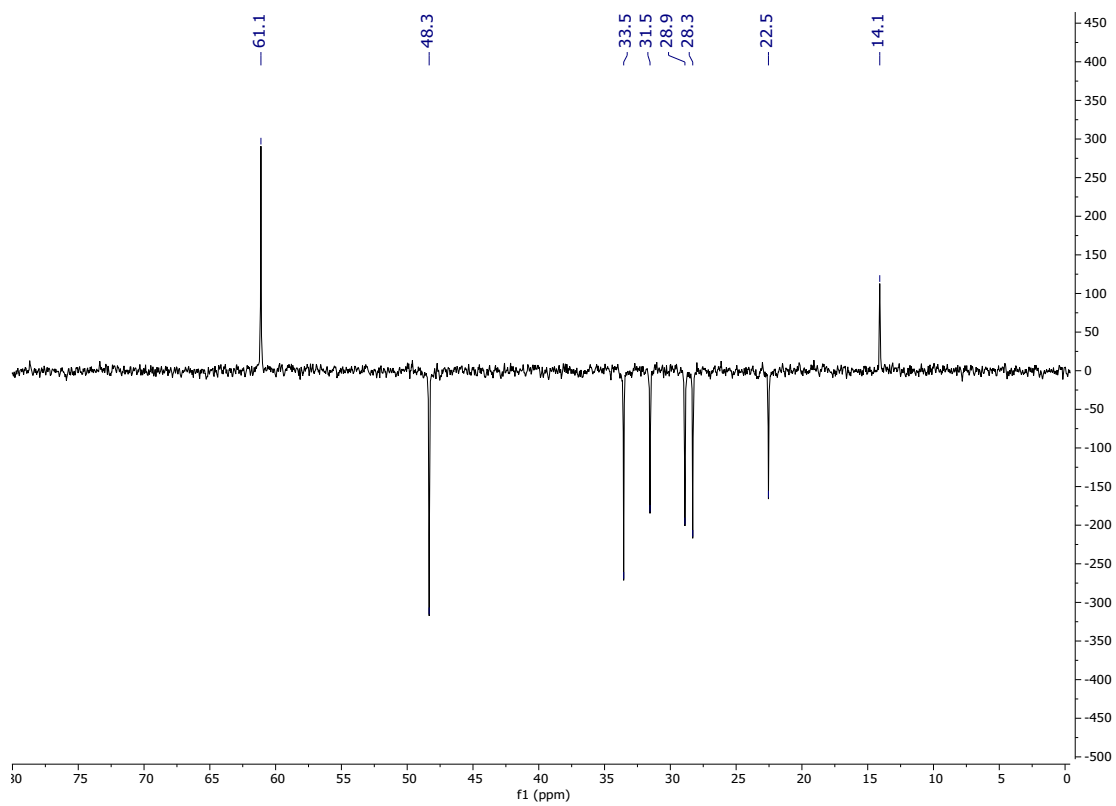

Figure SI\_8. DEPT-135 NMR for **2b** in  $\text{CDCl}_3$  (75 MHz).

#### 4-Butyl-1,3-dithiolane-2-thione (2c)

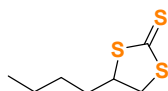

Prepared according to protocol **SP1**. Yellow oil (103 mg, 61% yield). Purified by flash chromatography (Hexane/EtOAc, 10:1).  $^1\text{H}$  NMR (300 MHz,  $\text{CDCl}_3$ ):  $\delta$  = 4.44-4.34 (m, 1H), 3.96 (dd,  $J$  = 11.9, 5.4 Hz, 1H), 3.71 (dd,  $J$  = 11.9, 7.9 Hz, 1H), 2.01-1.86 (m, 2H), 1.46-1.35 (m, 4H), 0.93 (t,  $J$  = 7.1 Hz, 3H).  $^{13}\text{C}$  NMR (75 MHz,  $\text{CDCl}_3$ ):  $\delta$  = 228.2 (C), 61.1 (CH), 48.4 ( $\text{CH}_2$ ), 33.3 ( $\text{CH}_2$ ), 30.4 ( $\text{CH}_2$ ), 22.4 ( $\text{CH}_2$ ), 13.9 ( $\text{CH}_3$ ).<sup>[6]</sup>

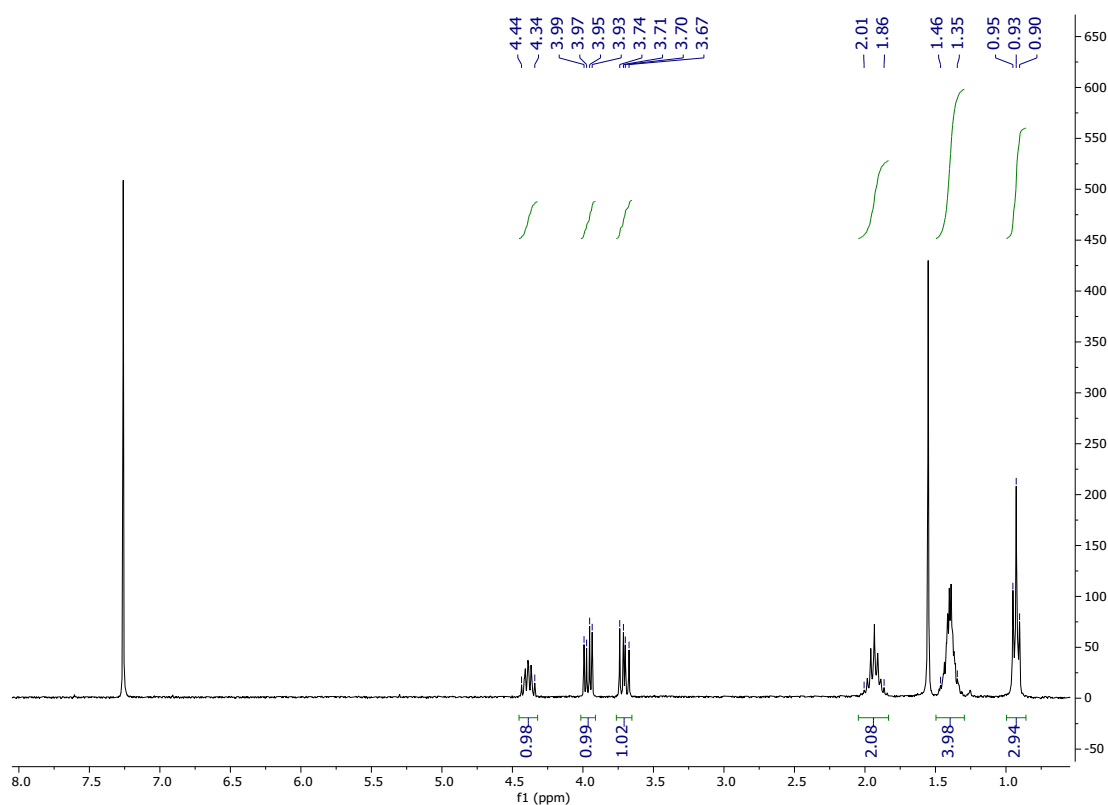

Figure SI\_9.  $^1\text{H}$ -NMR for **2c** in  $\text{CDCl}_3$  (300 MHz).



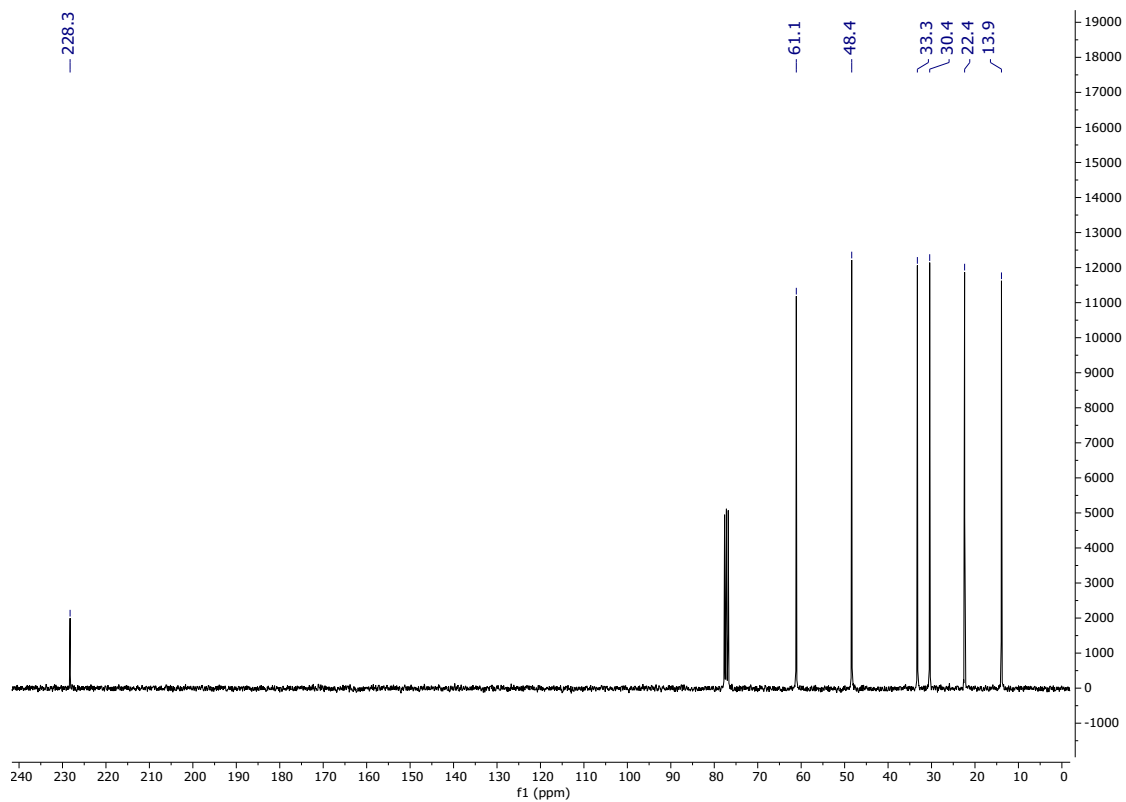

Figure SI\_10.  $^{13}\text{C}$ -NMR for **2c** in  $\text{CDCl}_3$  (75 MHz).

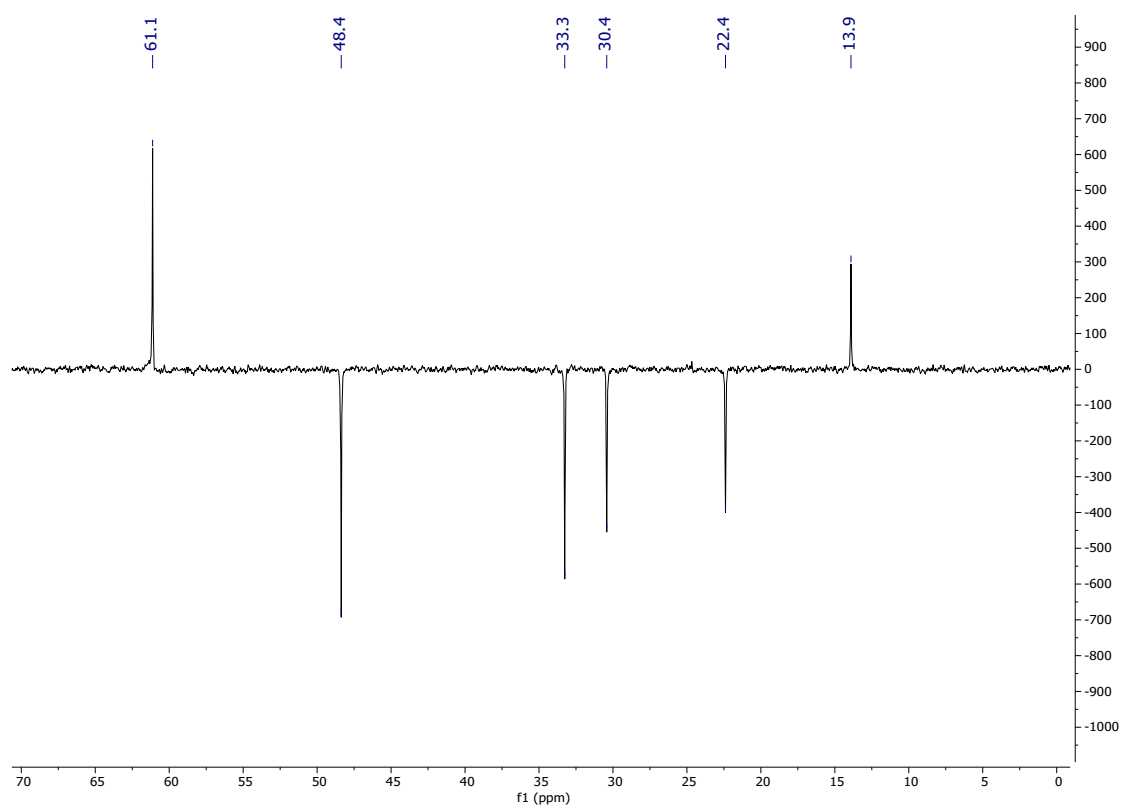

Figure SI\_11. DEPT-135 NMR for **2c** in  $\text{CDCl}_3$  (75 MHz).

#### 4-Methyl-4-phenyl-1,3-dithiolane-2-thione (2d)

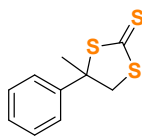

Prepared according to protocol **SP1**. Yellow oil (69 mg, 35% yield). Purified by flash chromatography (Hexane/EtOAc, 10:1). IR (NaCl):  $\nu$  3480, 3085, 3058, 3029, 2969, 2922, 2860, 2825, 1952, 1802, 1742, 1647, 1599, 1581, 1494, 1445, 1421, 1378, 1334, 1267, 1222, 1189, 1158, 1130, 1075, 1059, 1025, 1000, 925, 908, 886, 859, 762, 728, 696, 633, 618, 580  $\text{cm}^{-1}$ ;  $^1\text{H}$  NMR (300 MHz,  $\text{CDCl}_3$ ):  $\delta$  = 7.56-7.51(m, 2H), 7.45-7.33 (m, 3H), 4.42 (d,  $J$  = 12.2 Hz, 1H), 3.85 (d,  $J$  = 12.1 Hz, 1H), 2.15 (s, 3H).  $^{13}\text{C}$  NMR (75 MHz,  $\text{CDCl}_3$ ):  $\delta$  = 226.4 (C), 140.6 (C), 129.1 (2 $\times$ CH), 128.5 (CH), 126.1 (2 $\times$ CH), 71.7 (C), 55.1 ( $\text{CH}_2$ ), 28.0 ( $\text{CH}_3$ ).

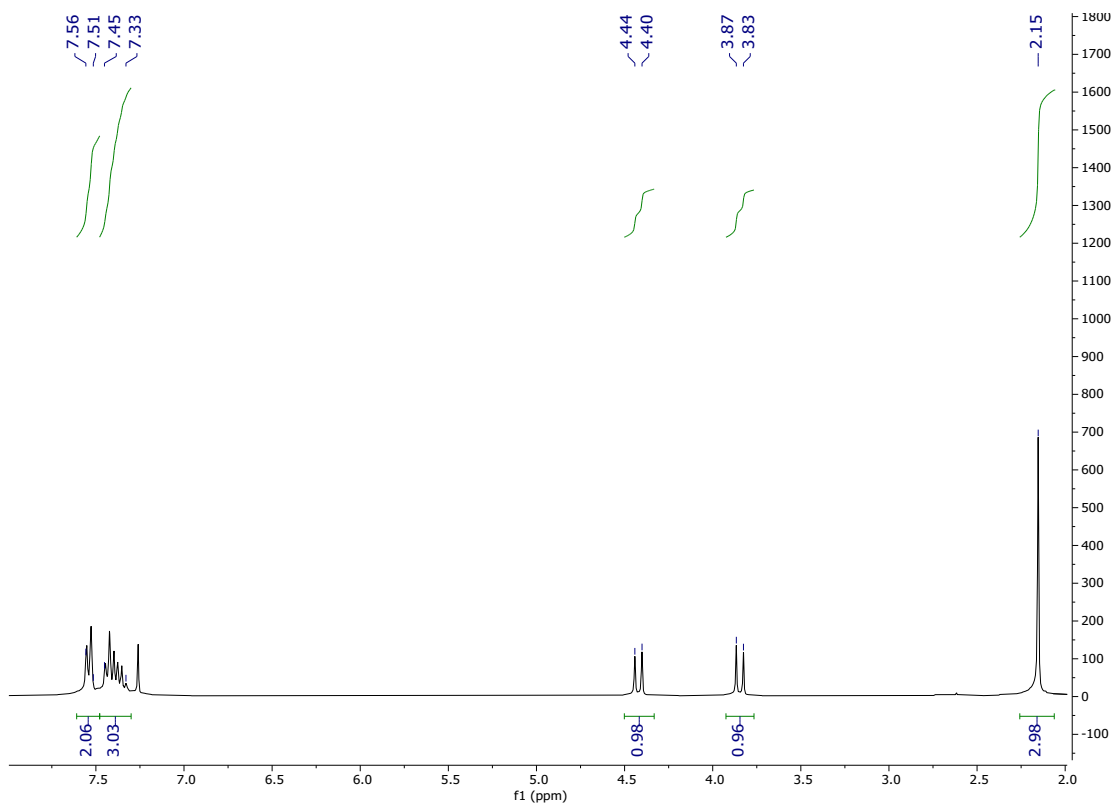

Figure SI<sub>12</sub>.  $^1\text{H}$ -NMR for **2d** in  $\text{CDCl}_3$  (300 MHz).

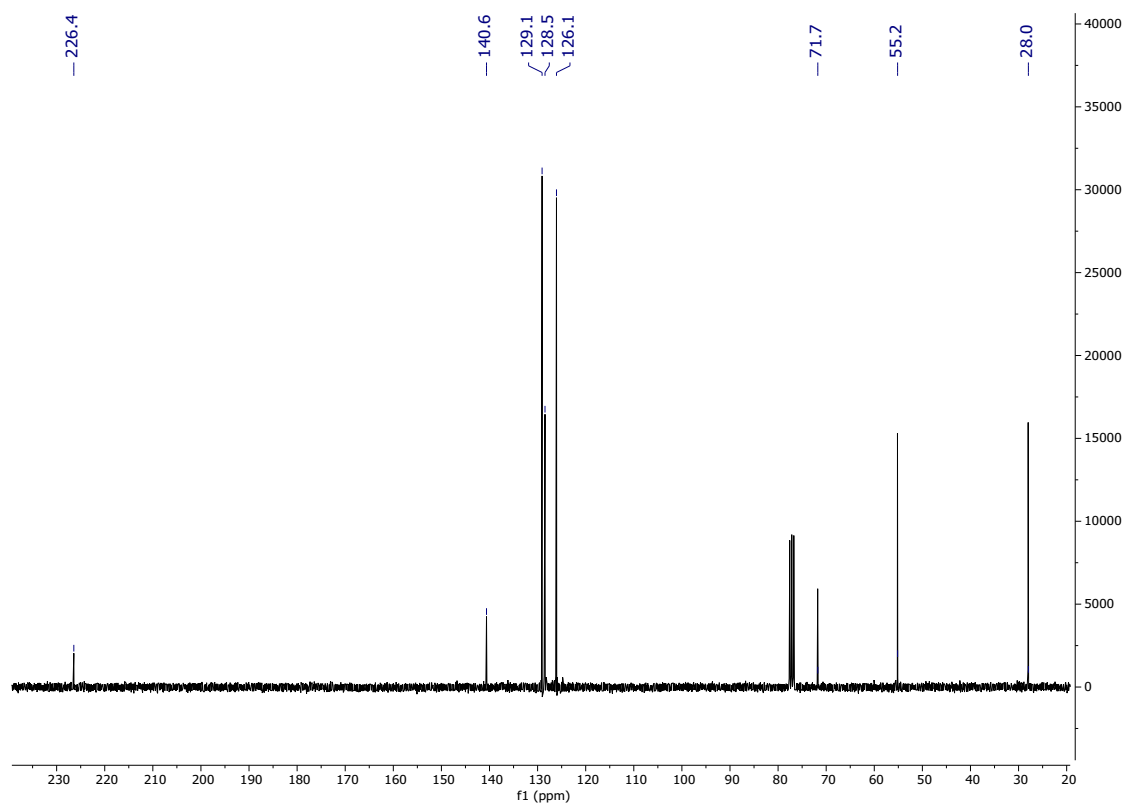

Figure SI\_13.  $^{13}\text{C}$ -NMR for **2d** in  $\text{CDCl}_3$  (75 MHz).

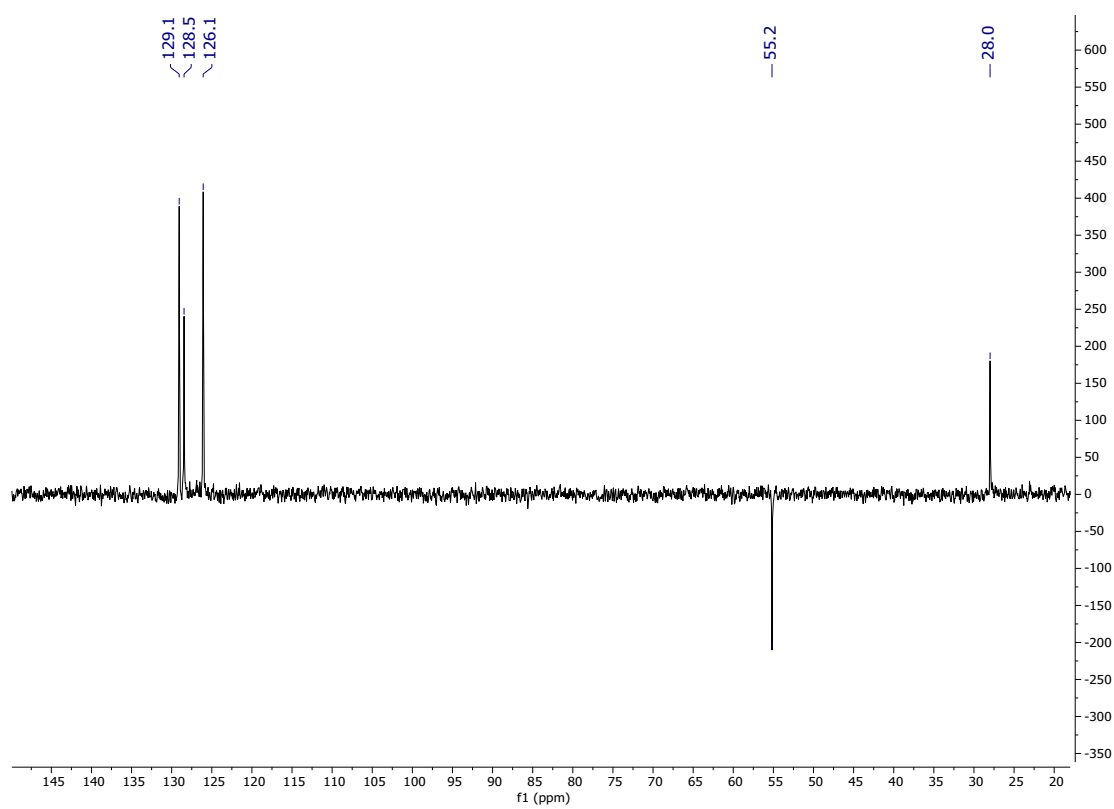

Figure SI\_14. DEPT-135 NMR for **2d** in  $\text{CDCl}_3$  (75 MHz).

**trans-Hexahydrobenzo[d][1,3]dithiole-2-thione (2e)**

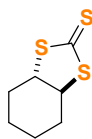

Prepared according to protocols **SP1** and **SP2**. Yellow solid (87 mg, 52% yield and 119 mg, 71% yield respectively). Purified by flash chromatography (Hexane/EtOAc, 10:1).  $^1\text{H}$  NMR (300 MHz,  $\text{CDCl}_3$ ):  $\delta$  = 4.14-4.04 (m, 2H), 2.26-2.18 (m, 2H), 2.05-1.89 (m, 2H), 1.79-1.66 (m, 2H), 1.54-1.42 (m, 2H).  $^{13}\text{C}$  NMR (75 MHz,  $\text{CDCl}_3$ ):  $\delta$  = 227.3 (C), 64.6 (2 $\times$ CH), 29.1 (2 $\times$ CH $_2$ ), 25.1 (2 $\times$ CH $_2$ ).<sup>[10]</sup>

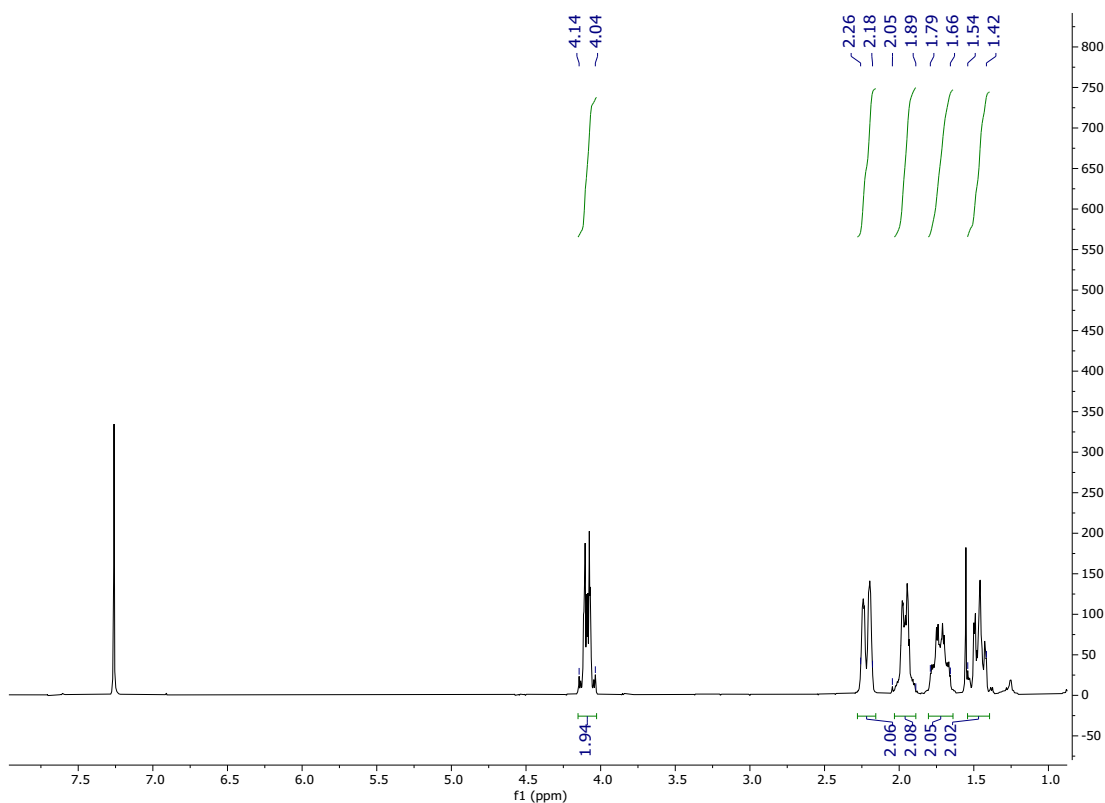

**Figure SI\_15.**  $^1\text{H}$ -NMR for **2e** in  $\text{CDCl}_3$  (300 MHz).

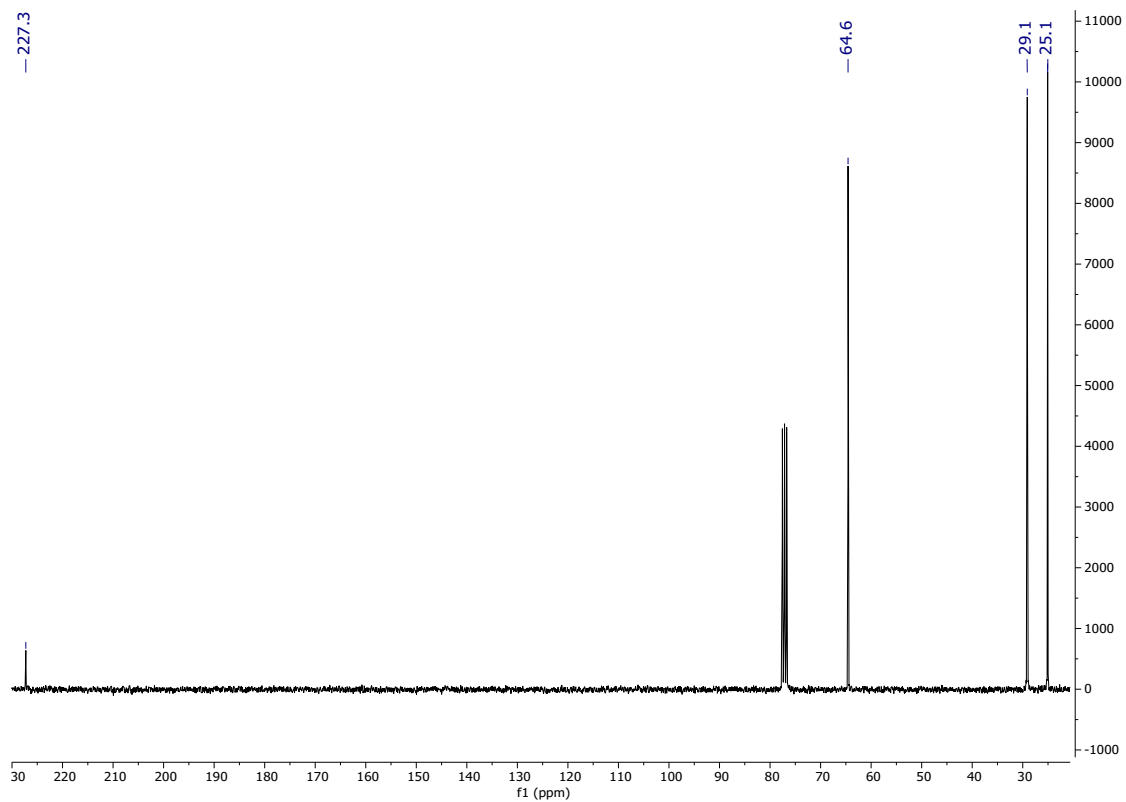

Figure SI\_16.  $^{13}\text{C}$ -NMR for **2e** in  $\text{CDCl}_3$  (75 MHz).

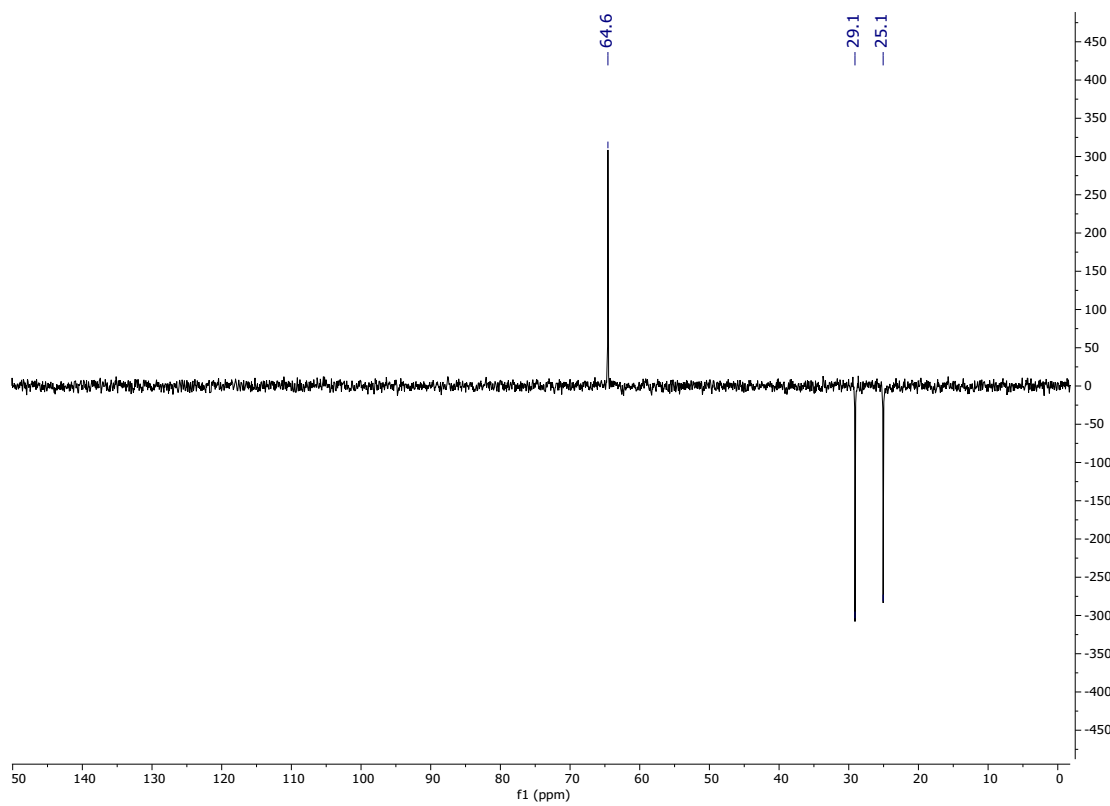

Figure SI\_17. DEPT-135 NMR for **2e** in  $\text{CDCl}_3$  (75 MHz).

***trans,cis*-4-Hydroxyhexahydrobenzo[d][1,3]dithiolane-2-thione (2f)**

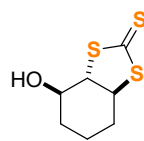

Prepared according to protocols **SP1** and **SP2**. Yellow solid (93 mg, 51% yield and 81 mg, 45% yield respectively). Purified by flash chromatography (Hexane/EtOAc, 3:1). IR (KBr):  $\nu$  3246, 2944, 2922, 2855, 1714, 1655, 1454, 1443, 1404, 1359, 1338, 1331, 1326, 1277, 1258, 1245, 1224, 1993, 1128, 1097, 1072, 1057, 1034, 1013, 971, 965, 958, 909, 901, 866, 856, 842, 775, 748, 687, 626, 570, 532, 507, 502, 464, 454  $\text{cm}^{-1}$ ;  $^1\text{H}$  NMR (300 MHz,  $\text{CDCl}_3$ ):  $\delta$  = 4.20-4.09 (m, 2H), 4.02-3.95 (m, 1H), 2.21-2.12 (m, 2H), 2.07-2.00 (m, 1H), 1.93 (d,  $J$  = 5.3 Hz, 1H), 1.73-1.41 (m, 3H).  $^{13}\text{C}$  NMR (75 MHz,  $\text{CDCl}_3$ ):  $\delta$  = 226.7 (C), 72.4 (CH), 71.6 (CH), 61.7 (CH), 34.8 ( $\text{CH}_2$ ), 28.1 ( $\text{CH}_2$ ), 23.7 ( $\text{CH}_2$ ).

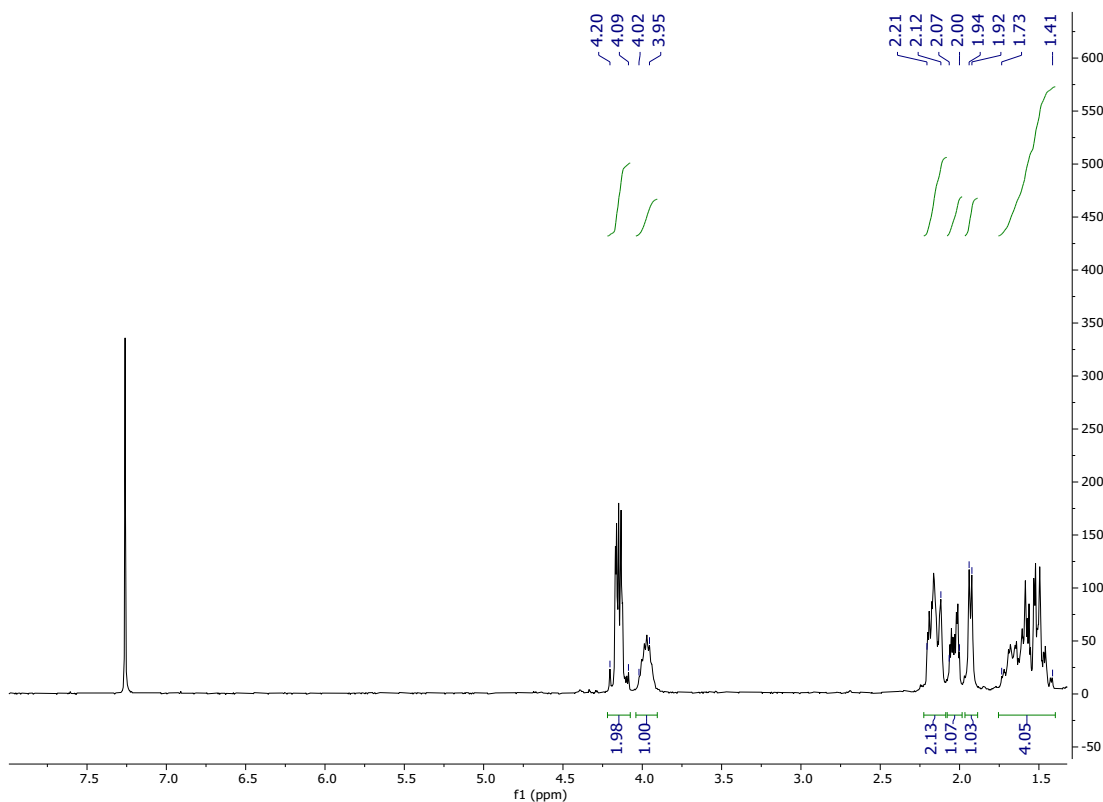

**Figure SI\_18.**  $^1\text{H}$ -NMR for **2f** in  $\text{CDCl}_3$  (300 MHz).

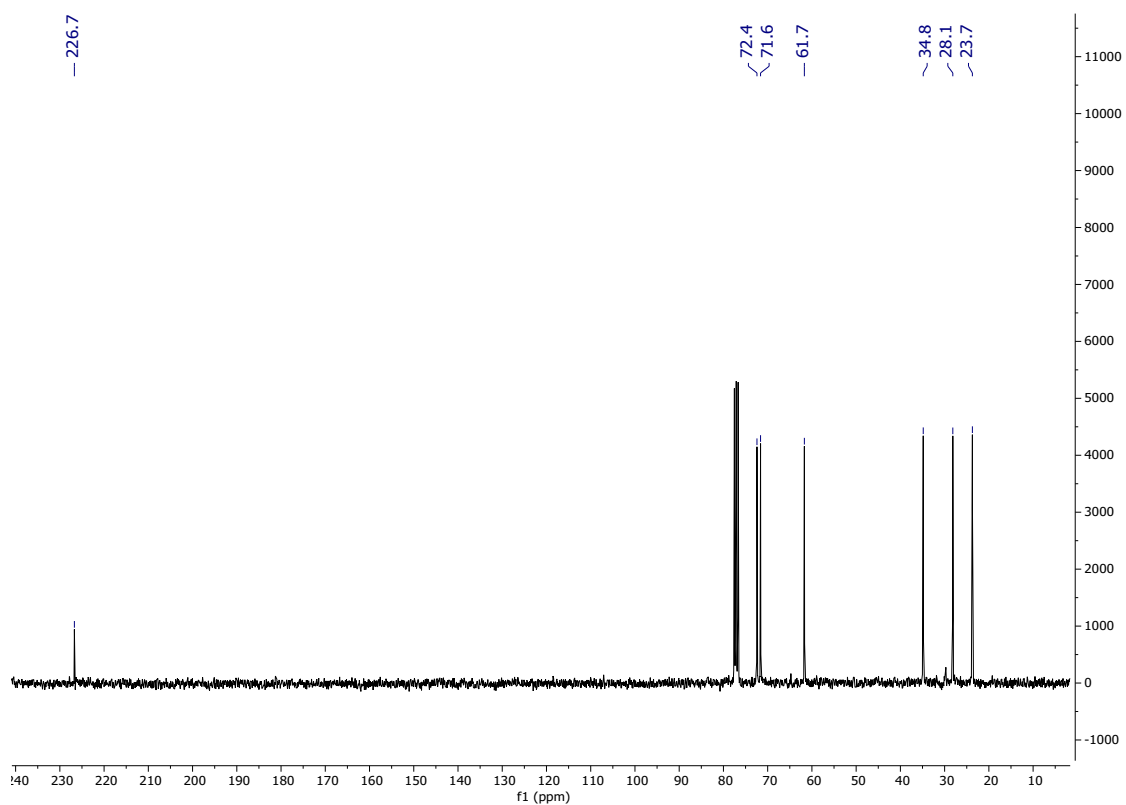

Figure SI\_19.  $^{13}\text{C}$ -NMR for **2f** in  $\text{CDCl}_3$  (75 MHz).

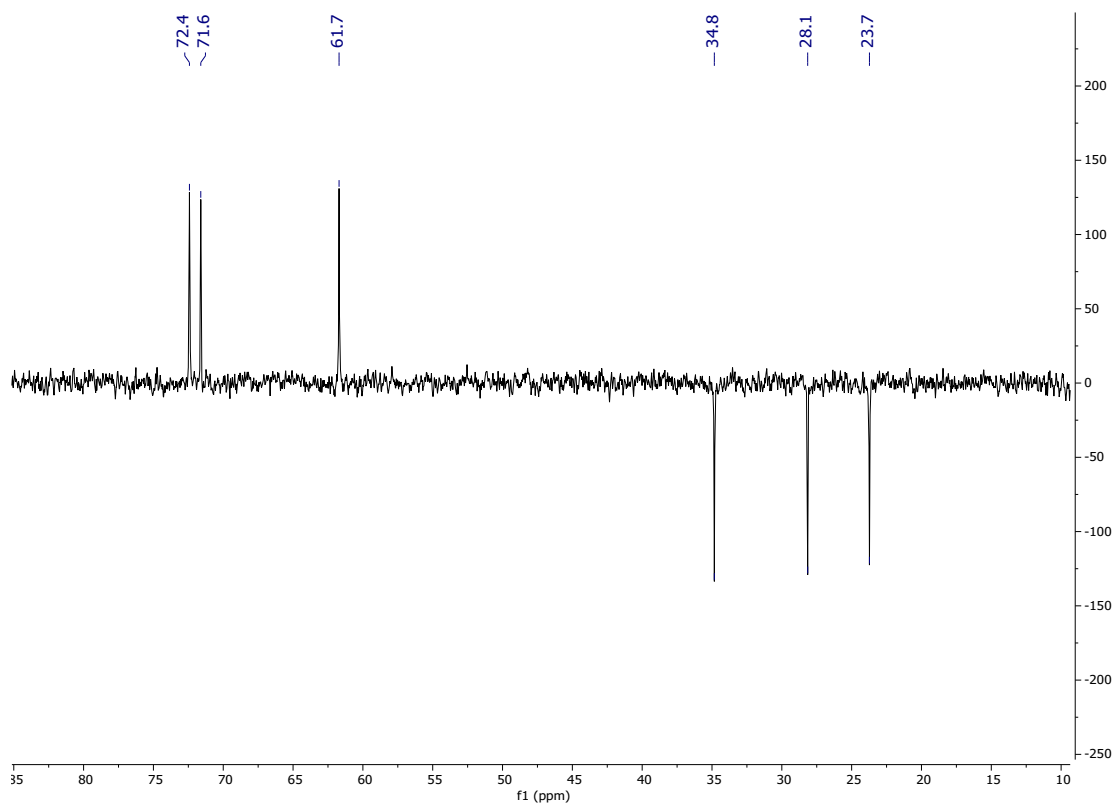

Figure SI\_20. DEPT-135 NMR for **2f** in  $\text{CDCl}_3$  (75 MHz).

***trans,cis*-4-(Benzyloxy)hexahydrobenzo[d][1,3]dithiolane-2-thione (2g)**

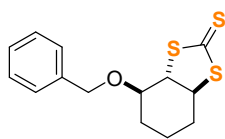

Prepared according to protocol **SP1**. Yellow solid (151 mg, 58% yield). Purified by flash chromatography (Hexane/EtOAc, 10:1). Crystallized for X-Ray diffraction analysis using THF/Hexanes. IR (KBr):  $\nu$  3083, 3057, 3024, 2942, 2928, 2893, 2861, 1978, 1959, 1899, 1879, 1816, 1759, 1715, 1658, 1600, 1495, 1469, 1453, 1442, 1398, 1362, 1347, 1337, 1328, 1308, 1282, 1268, 1242, 1233, 1211, 1188, 1175, 1159, 1132, 1106, 1074, 1059, 1051, 1027, 1005, 991, 974, 947, 929, 912, 865, 859, 845, 826, 777, 743, 699, 624, 520, 505, 477, 460  $\text{cm}^{-1}$ ;  $^1\text{H}$  NMR (300 MHz,  $\text{CDCl}_3$ ):  $\delta$  = 7.39-7.28 (m, 5H), 4.65 (d,  $J$  = 11.7 Hz, 1H), 4.50 (d,  $J$  = 11.8 Hz, 1H), 4.25 (dd,  $J$  = 12.6, 9.9 Hz, 1H), 4.11 (td,  $J$  = 12.0, 3.5 Hz, 1H), 3.73-3.65 (m, 1H), 2.39-2.30 (m, 1H), 2.17-2.01 (m, 2H), 1.74-1.60 (m, 1H), 1.53-1.36 (m, 2H).  $^{13}\text{C}$  NMR (75 MHz,  $\text{CDCl}_3$ ):  $\delta$  = 226.8 (C), 137.5 (C), 128.6 (2 $\times$ CH), 128.0 (CH), 127.7 (2 $\times$ CH), 78.7 (CH), 70.8 ( $\text{CH}_2$ ), 69.7 (CH), 61.7 (CH), 30.9 ( $\text{CH}_2$ ), 28.4 ( $\text{CH}_2$ ), 23.6 ( $\text{CH}_2$ ).

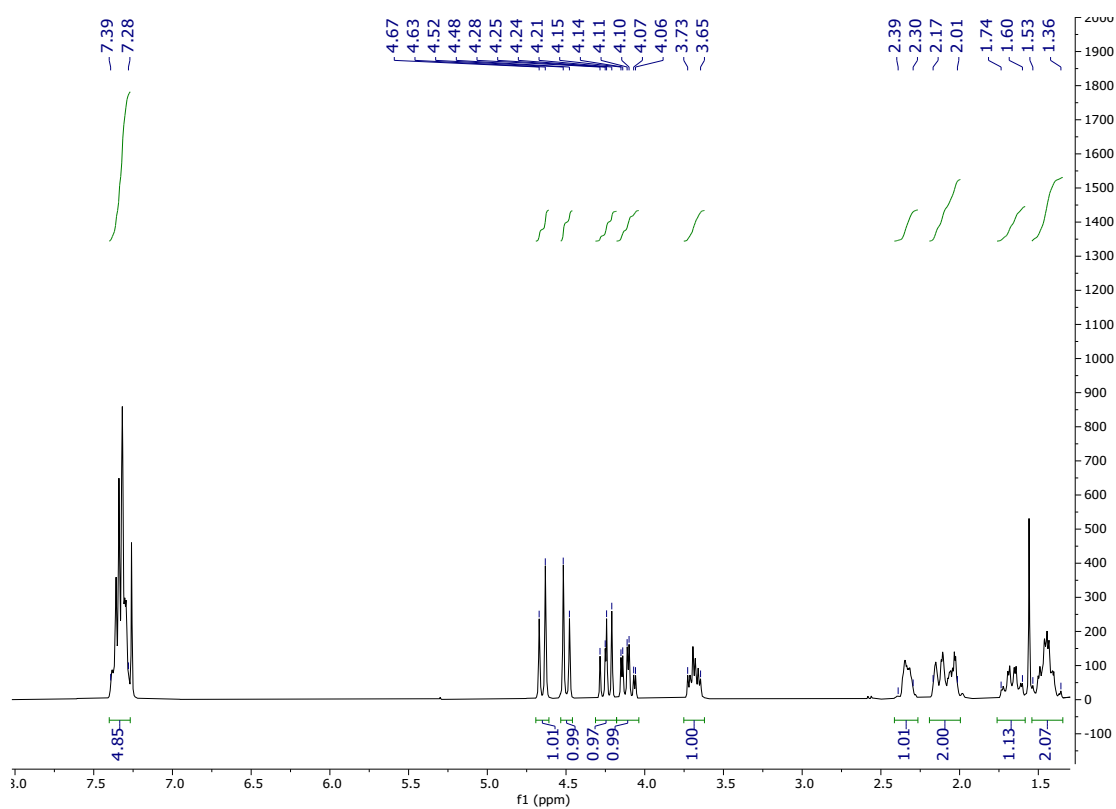

**Figure SI<sub>21</sub>**.  $^1\text{H}$ -NMR for **2g** in  $\text{CDCl}_3$  (300 MHz).



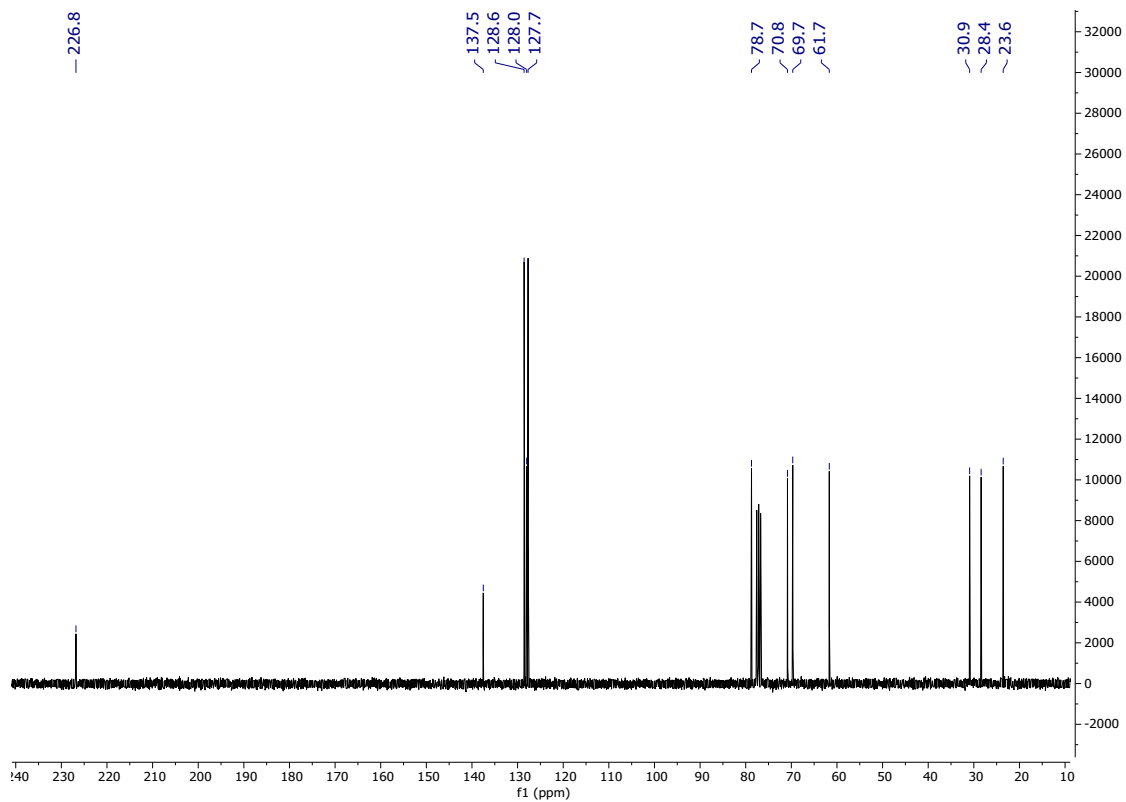

Figure SI\_22.  $^{13}\text{C}$ -NMR for **2g** in  $\text{CDCl}_3$  (75 MHz).

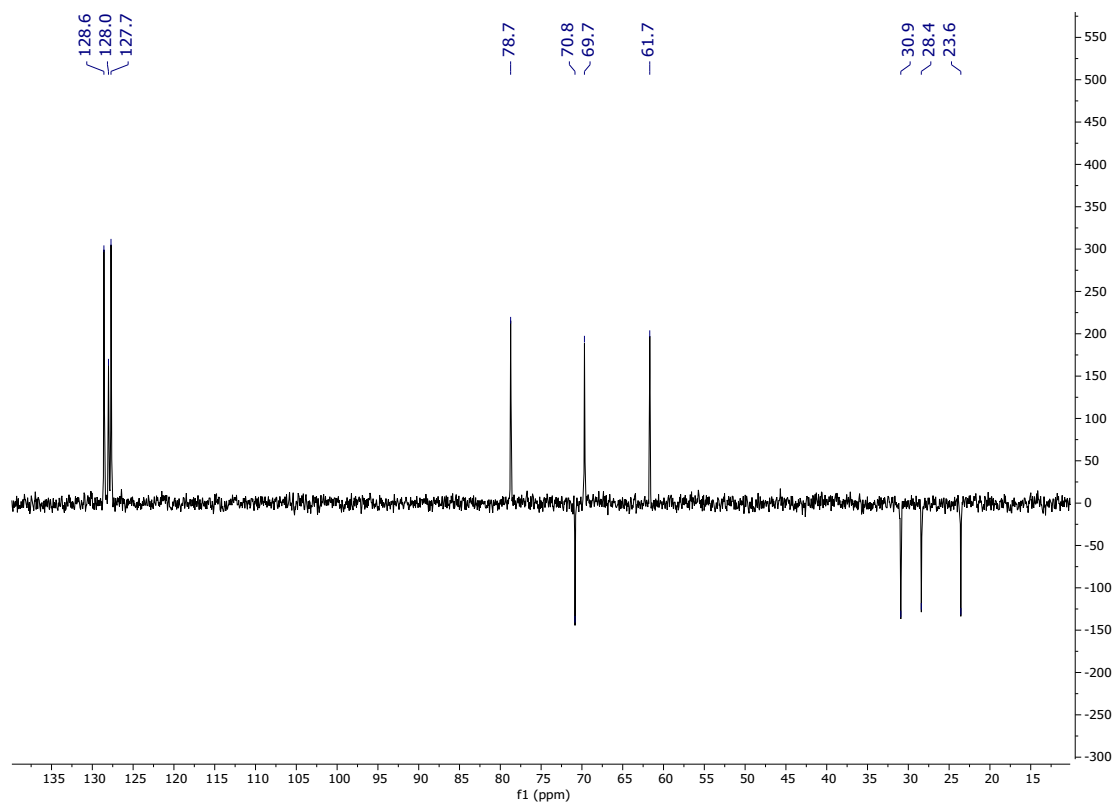

Figure SI\_23. DEPT-135 NMR for **2g** in  $\text{CDCl}_3$  (75 MHz).

#### 4-((Furan-2-ylmethoxy)methyl)-1,3-dithiolane-2-thione (2h)

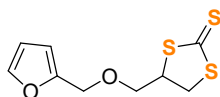

Prepared according to protocol **SP1**. Yellow oil (106 mg, 49% yield). Purified by flash chromatography (Hexane/EtOAc, 7:1).  $^1\text{H}$  NMR (300 MHz,  $\text{CDCl}_3$ ):  $\delta$  = 7.43 (s, 1H), 6.36 (s, 2H), 4.52 (s, 2H), 4.44-4.36 (m, 1H), 4.07 (dd,  $J$  = 12.1, 5.6 Hz, 1H), 3.92 (dd,  $J$  = 12.1, 4.3 Hz, 1H), 3.85 (t,  $J$  = 9.5 Hz, 1H), 3.67 (dd,  $J$  = 9.8, 5.5 Hz, 1H).  $^{13}\text{C}$  NMR (75 MHz,  $\text{CDCl}_3$ ):  $\delta$  = 227.5 (C), 150.8 (C), 143.2 (CH), 110.5 (CH), 110.1 (CH), 68.6 ( $\text{CH}_2$ ), 65.1 ( $\text{CH}_2$ ), 58.0 (CH), 45.0 ( $\text{CH}_2$ ).<sup>[6]</sup>

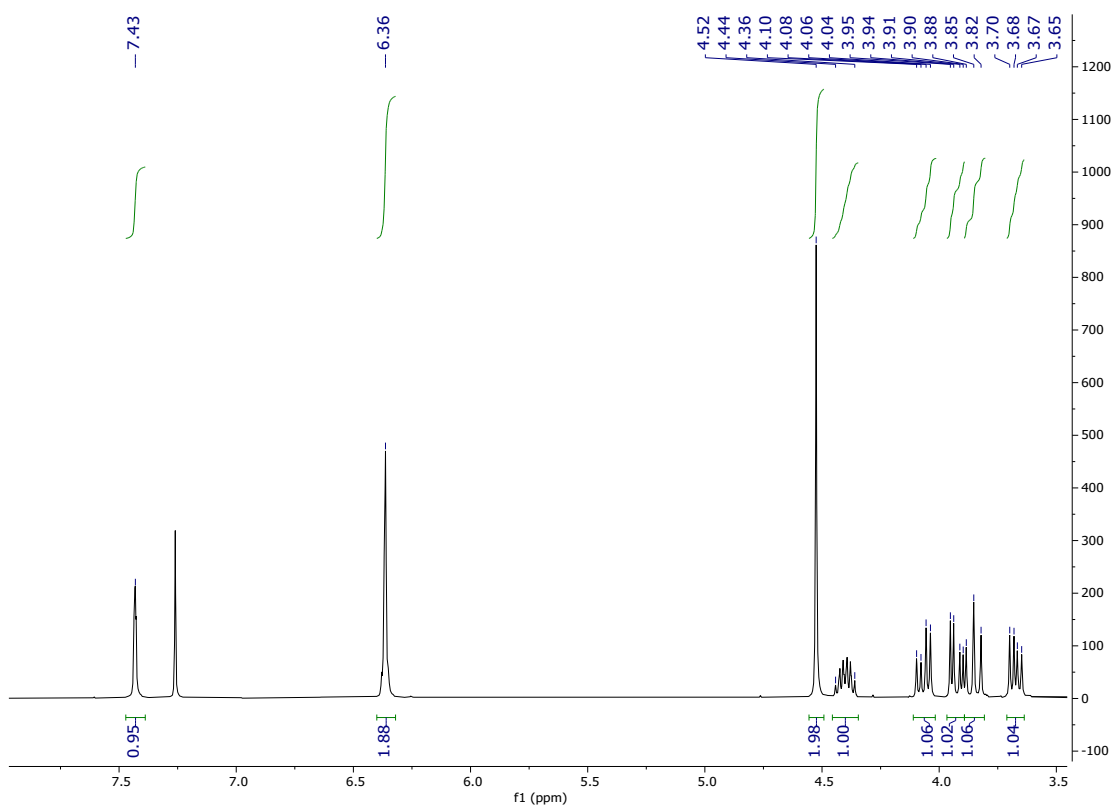

Figure SI\_24.  $^1\text{H}$ -NMR for **2h** in  $\text{CDCl}_3$  (300 MHz).

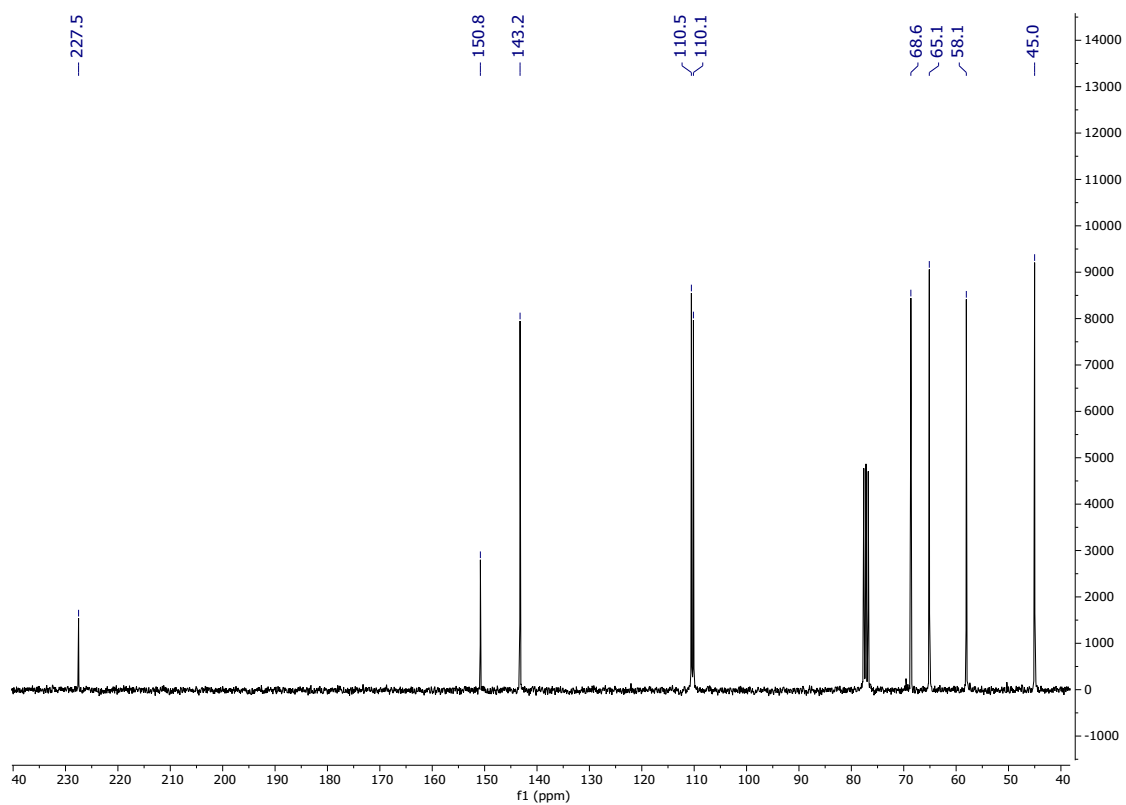

Figure SI\_25.  $^{13}\text{C}$ -NMR for **2h** in  $\text{CDCl}_3$  (75 MHz).

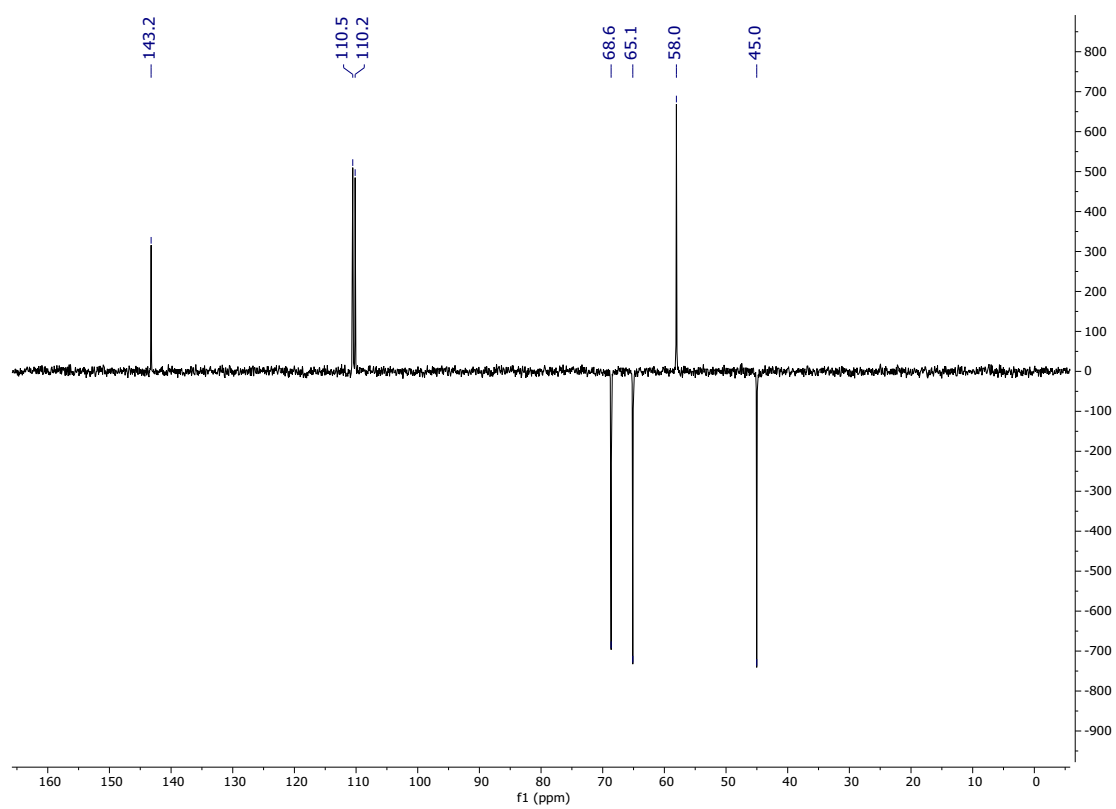

Figure SI\_26. DEPT-135 NMR for **2h** in  $\text{CDCl}_3$  (75 MHz).

#### 4-((Benzyloxy)methyl)-1,3-dithiolane-2-thione (2i)

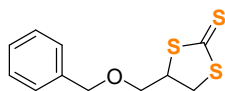

Prepared according to protocol **SP1**. Yellow oil (112 mg, 50% yield). Purified by flash chromatography (Hexane/EtOAc, 10:1).  $^1\text{H}$  NMR (300 MHz,  $\text{CDCl}_3$ ):  $\delta$  = 7.40-7.30 (m, 5H), 4.59 (s, 2H), 4.52-4.44 (m, 1H), 4.08 (dd,  $J$  = 12.1, 5.6 Hz, 1H), 3.96 (dd,  $J$  = 12.1, 4.7 Hz, 1H), 3.86 (t,  $J$  = 9.2 Hz, 1H), 3.68 (dd,  $J$  = 9.7, 5.8 Hz, 1H).  $^{13}\text{C}$  NMR (75 MHz,  $\text{CDCl}_3$ ):  $\delta$  = 227.6 (C), 137.3 (C), 128.7 (2 $\times$ CH), 128.2 (CH), 127.9 (2 $\times$ CH), 73.5 ( $\text{CH}_2$ ), 69.1 ( $\text{CH}_2$ ), 58.4 (CH), 45.1 ( $\text{CH}_2$ ).<sup>[6]</sup>

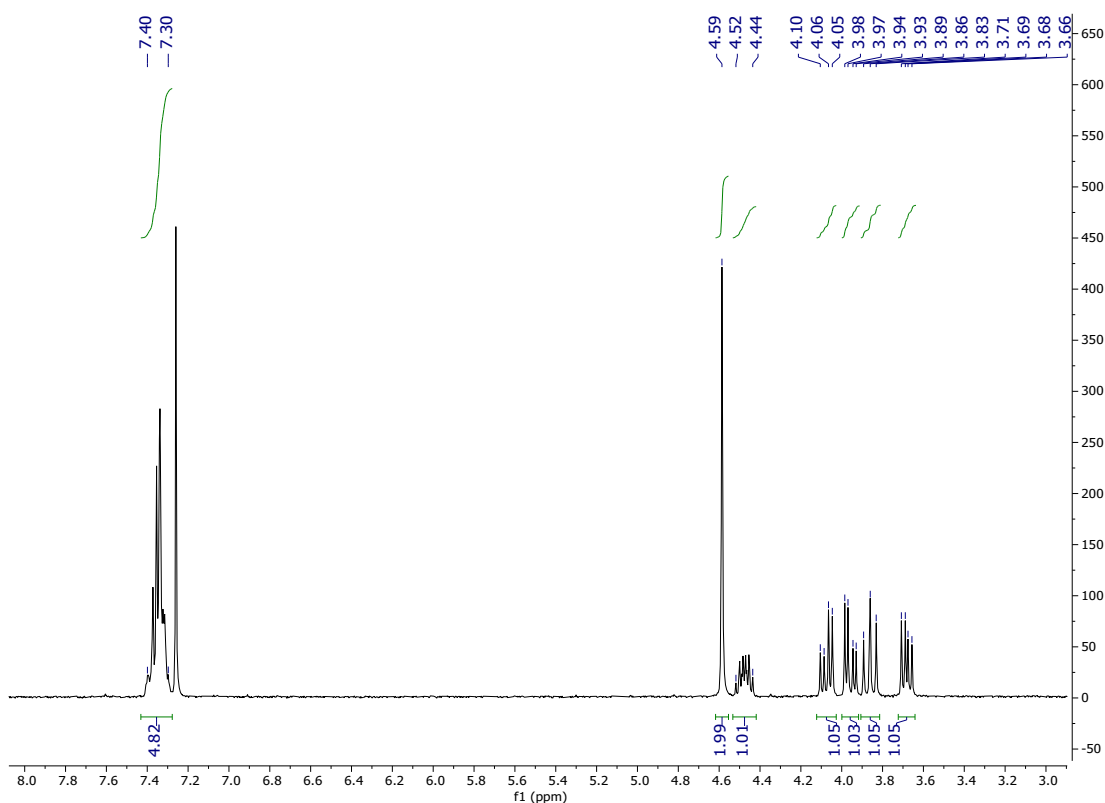

Figure SI\_27.  $^1\text{H}$ -NMR for **2i** in  $\text{CDCl}_3$  (300 MHz).

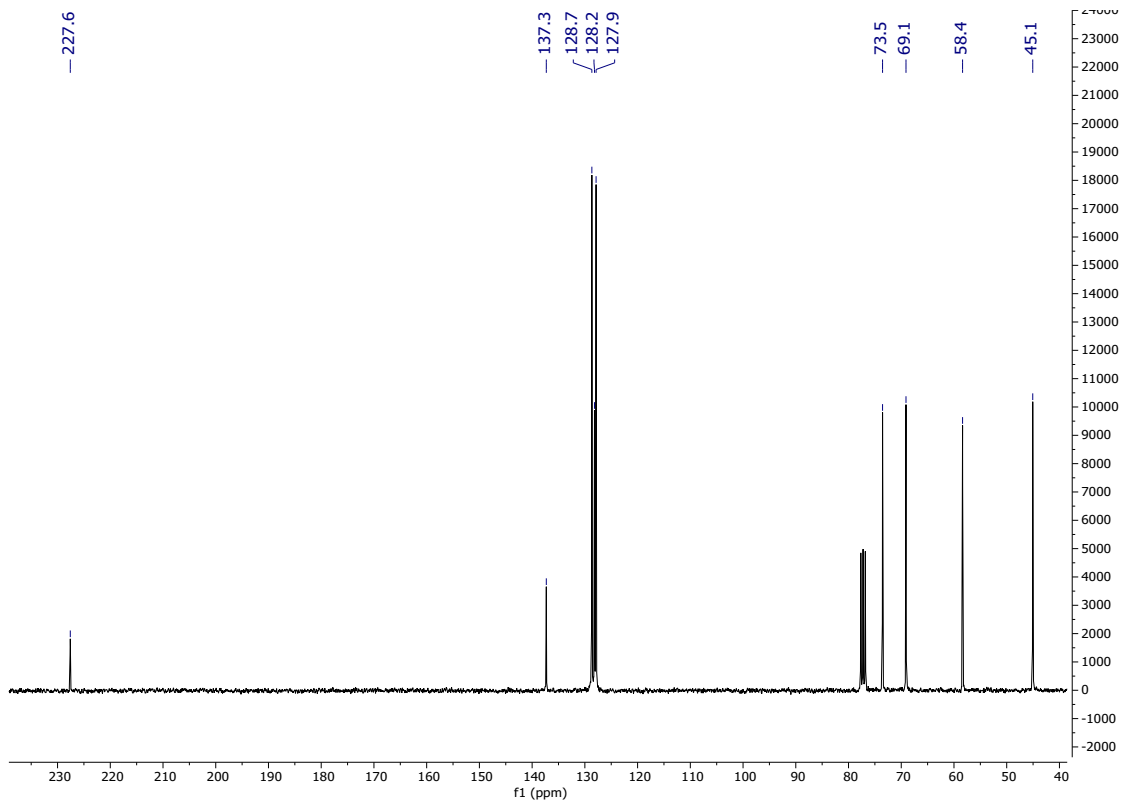

Figure SI\_28.  $^{13}\text{C}$ -NMR for **2i** in  $\text{CDCl}_3$  (75 MHz).

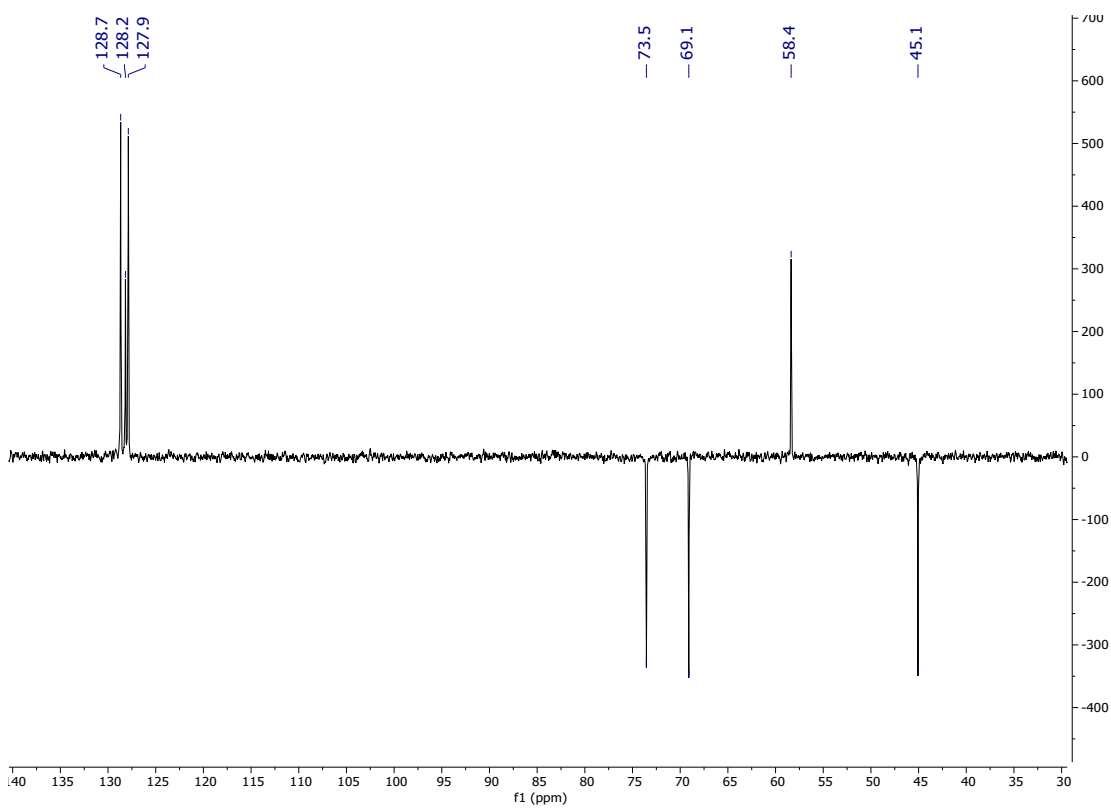

Figure SI\_29. DEPT-135 NMR for **2i** in  $\text{CDCl}_3$  (75 MHz).

#### 4-((4-Methoxyphenoxy)methyl)-1,3-dithiolane-2-thione (2j)

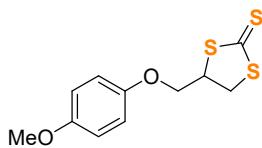

Prepared according to protocol **SP1**. Yellow oil (135 mg, 56% yield). Purified by flash chromatography (Hexane/EtOAc, 6:1).  $^1\text{H}$  NMR (300 MHz,  $\text{CDCl}_3$ ):  $\delta$  = 6.85 (s, 4H), 4.66-4.56 (m, 1H), 4.32 (t,  $J$  = 9.4 Hz, 1H), 4.24-4.04 (m, 3H), 3.78 (s, 3H).  $^{13}\text{C}$  NMR (75 MHz,  $\text{CDCl}_3$ ):  $\delta$  = 227.0 (C), 154.6 (C), 151.9 (C), 115.9 (2 $\times$ CH), 114.9 (2 $\times$ CH), 67.5 ( $\text{CH}_2$ ), 57.6 (CH), 55.8 ( $\text{CH}_3$ ), 45.1 ( $\text{CH}_2$ ).<sup>[6]</sup>

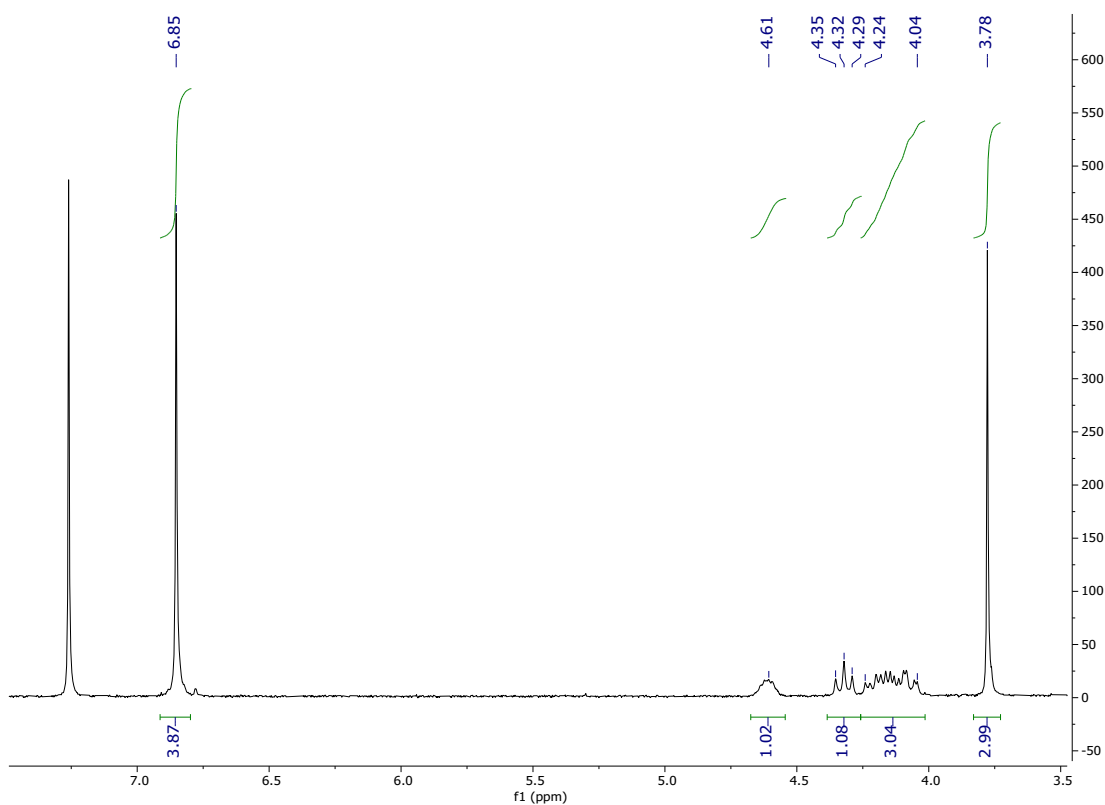

Figure SI\_30.  $^1\text{H}$ -NMR for **2j** in  $\text{CDCl}_3$  (300 MHz).

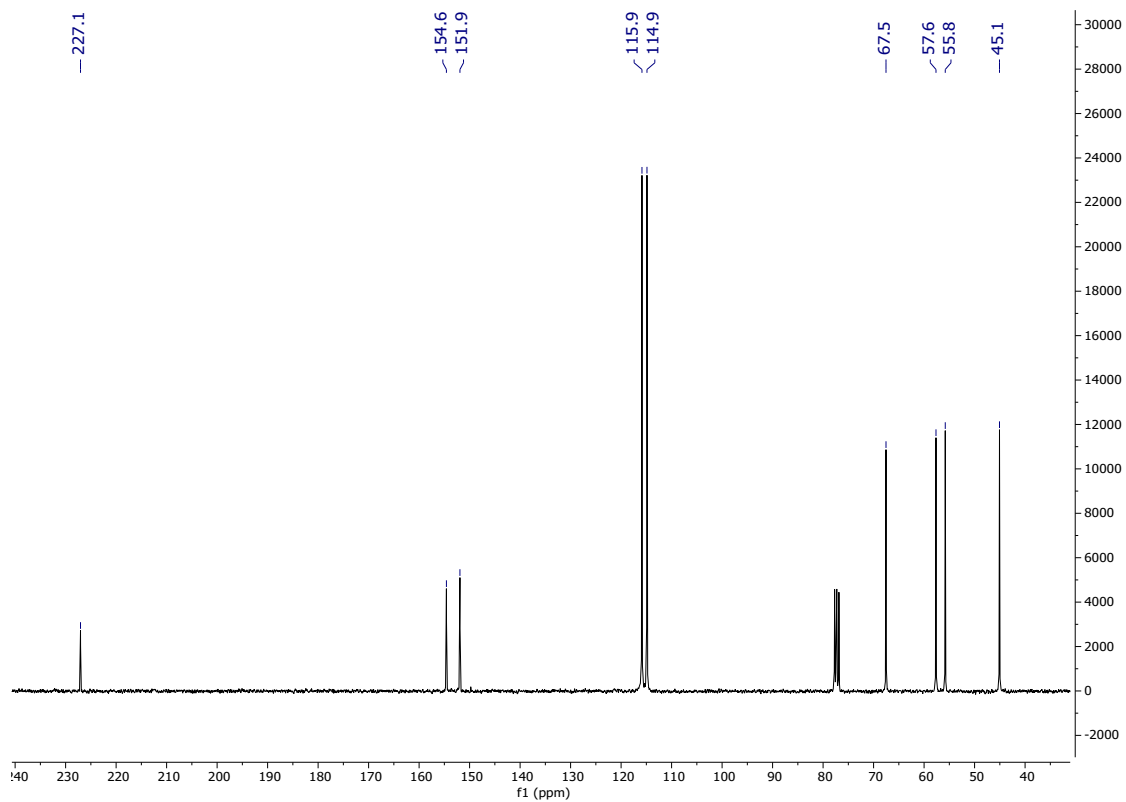

Figure SI\_31.  $^{13}\text{C}$ -NMR for **2j** in  $\text{CDCl}_3$  (75 MHz).

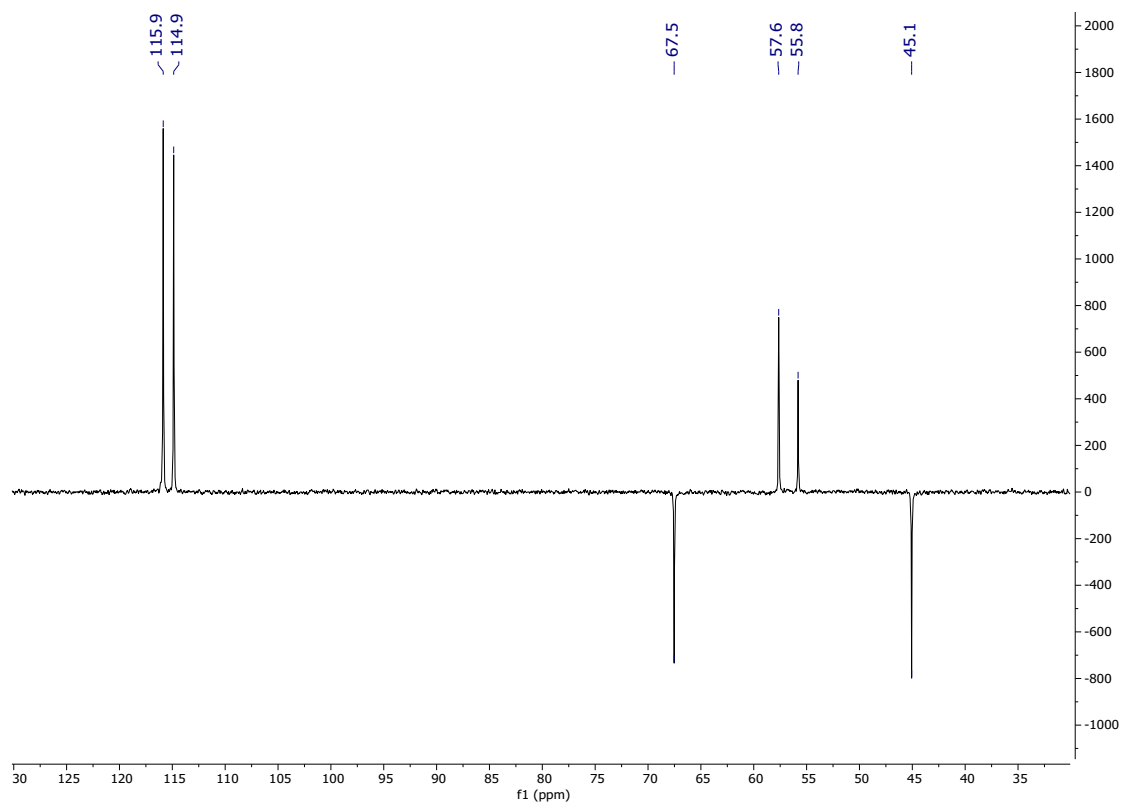

Figure SI\_32. DEPT-135 NMR for **2j** in  $\text{CDCl}_3$  (75 MHz).

### 5-((Furan-2-ylmethoxy)methyl)-1,3-oxathiolane-2-thione (4h)

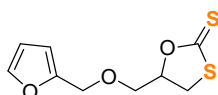

Prepared according protocol **SP2**. Yellow oil (145 mg, 71% yield). Purified by flash chromatography (Hexane/EtOAc, 4:1).  $^1\text{H}$  NMR (300 MHz,  $\text{CDCl}_3$ ):  $\delta$  = 7.43 (t,  $J$  = 1.4 Hz, 1H), 6.37 (d,  $J$  = 1.4 Hz, 2H), 5.24-5.16 (m, 1H), 4.60-4.51(m, 2H), 3.86-3.76 (m, 2H), 3.68-3.54 (m, 2H).  $^{13}\text{C}$  NMR (75 MHz,  $\text{CDCl}_3$ ):  $\delta$  = 212.0 (C), 150.7 (C), 143.2 (CH), 110.5 (CH), 110.3 (CH), 89.1 (CH), 68.2 ( $\text{CH}_2$ ), 65.3 ( $\text{CH}_2$ ), 36.1 ( $\text{CH}_2$ ).<sup>[6]</sup>

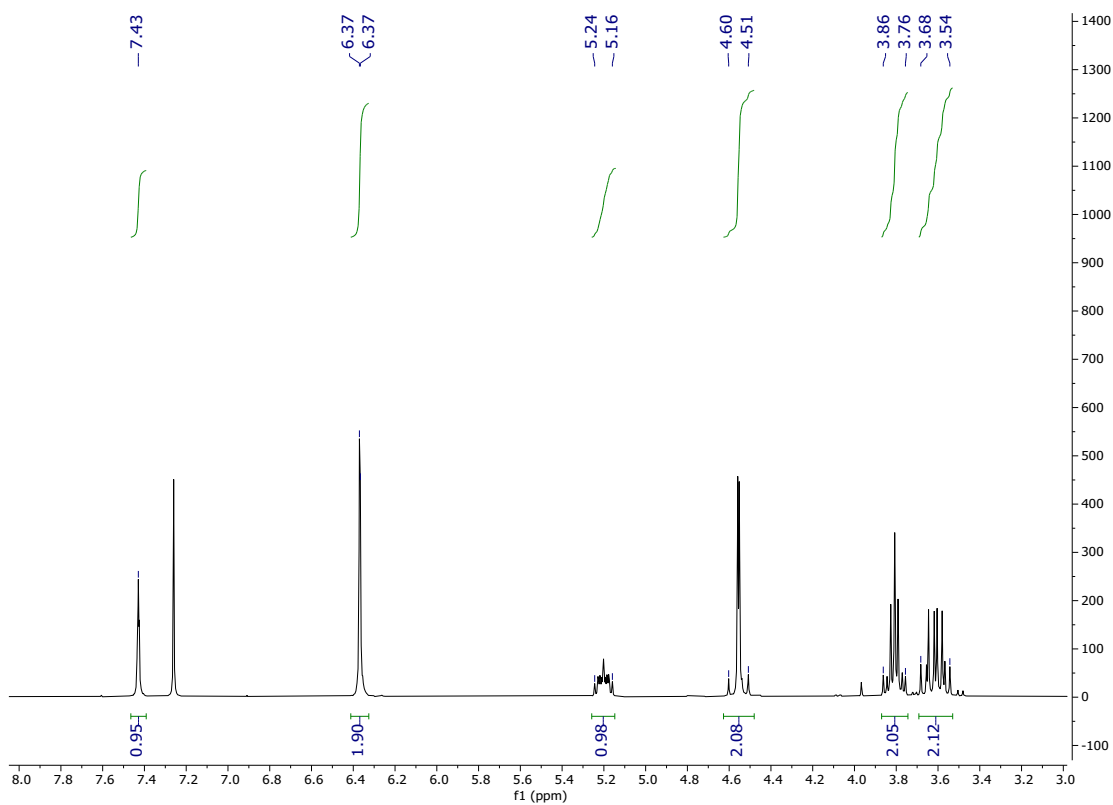

Figure SI\_33.  $^1\text{H}$ -NMR for 4h in  $\text{CDCl}_3$  (300 MHz).



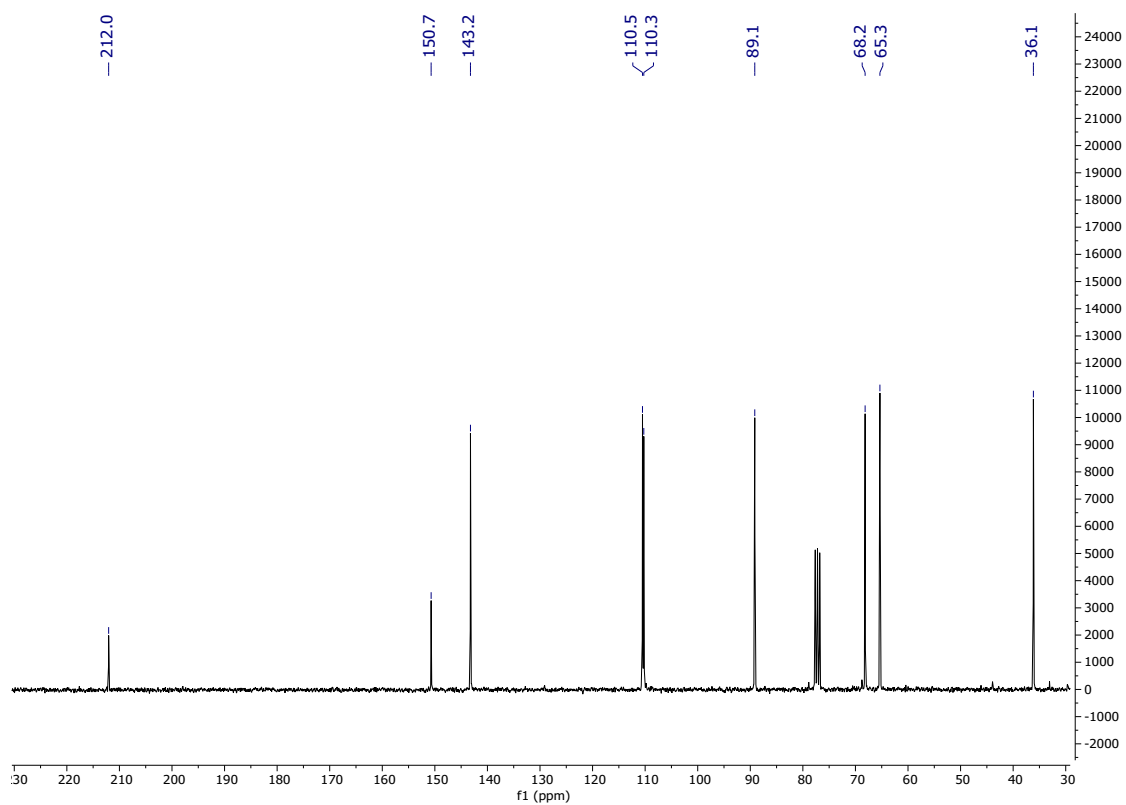

Figure SI\_34.  $^{13}\text{C}$ -NMR for **4h** in  $\text{CDCl}_3$  (75 MHz).

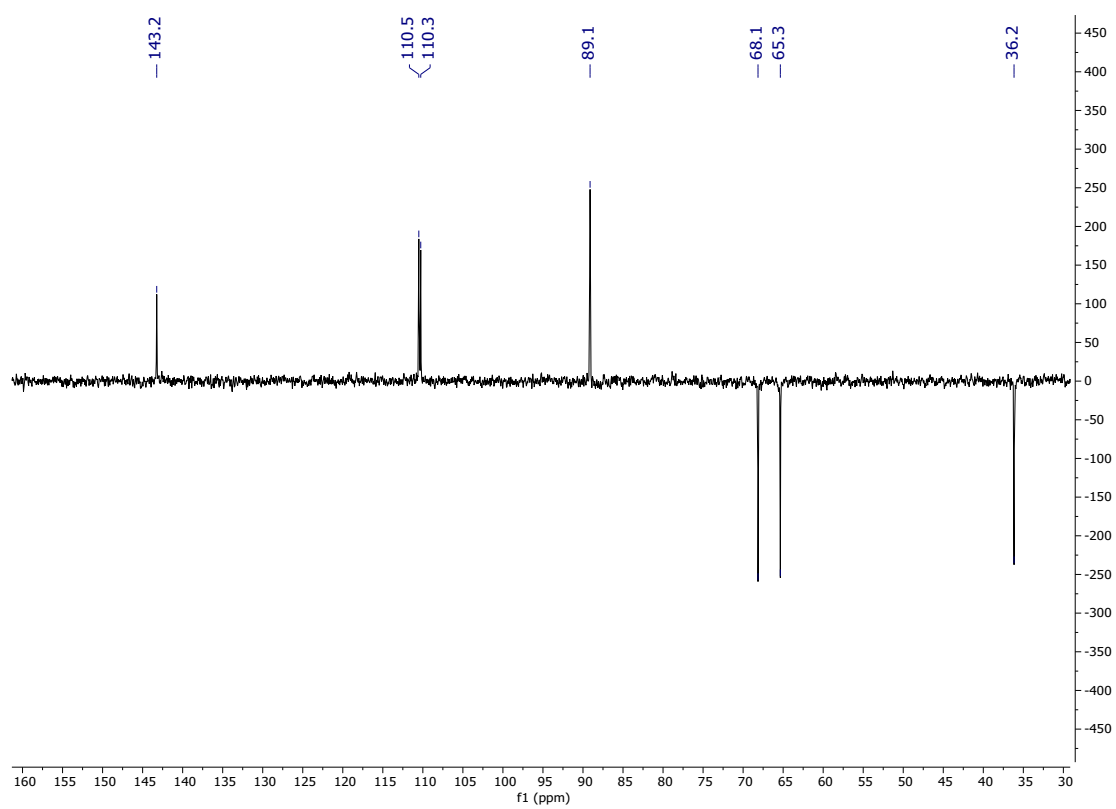

Figure SI\_35. DEPT-135 NMR for **4h** in  $\text{CDCl}_3$  (75 MHz).

### 5-((Benzyloxy)methyl)-1,3-oxathiolane-2-thione (4i)

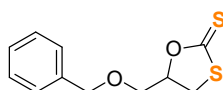

Prepared according to protocol **SP2**. Yellow oil (171 mg, 81% yield). Purified by flash chromatography (Hexane/EtOAc, 4:1).  $^1\text{H}$  NMR (300 MHz,  $\text{CDCl}_3$ ):  $\delta$  = 7.41-7.30 (m, 5H), 5.30-5.20 (m, 1H), 4.66-4.56 (m, 2H), 3.87-3.76 (m, 2H), 3.73-3.57 (m, 2H).  $^{13}\text{C}$  NMR (75 MHz,  $\text{CDCl}_3$ ):  $\delta$  = 212.0 (C), 137.2 (C), 128.6 (2 $\times$ CH), 128.1 (CH), 127.9 (2 $\times$ CH), 89.2 (CH), 73.8 ( $\text{CH}_2$ ), 68.6 ( $\text{CH}_2$ ), 36.2 ( $\text{CH}_2$ ).<sup>[6]</sup>

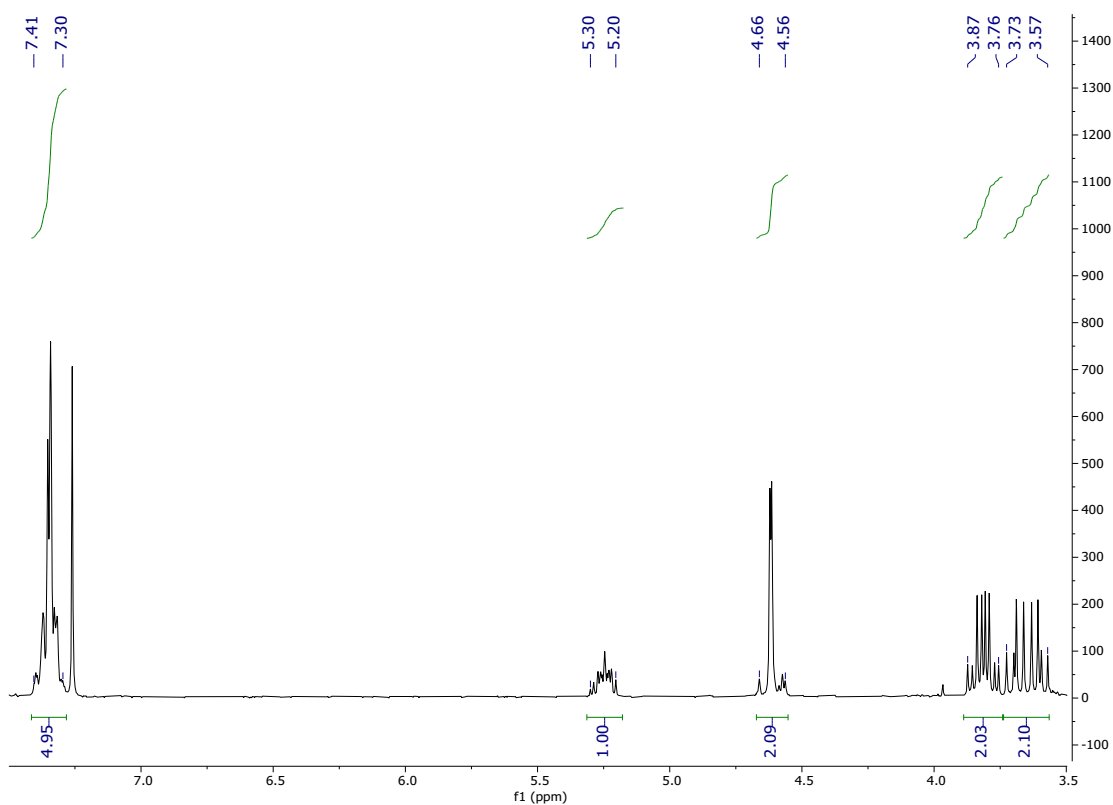

Figure SI\_36.  $^1\text{H}$ -NMR for **4i** in  $\text{CDCl}_3$  (300 MHz).

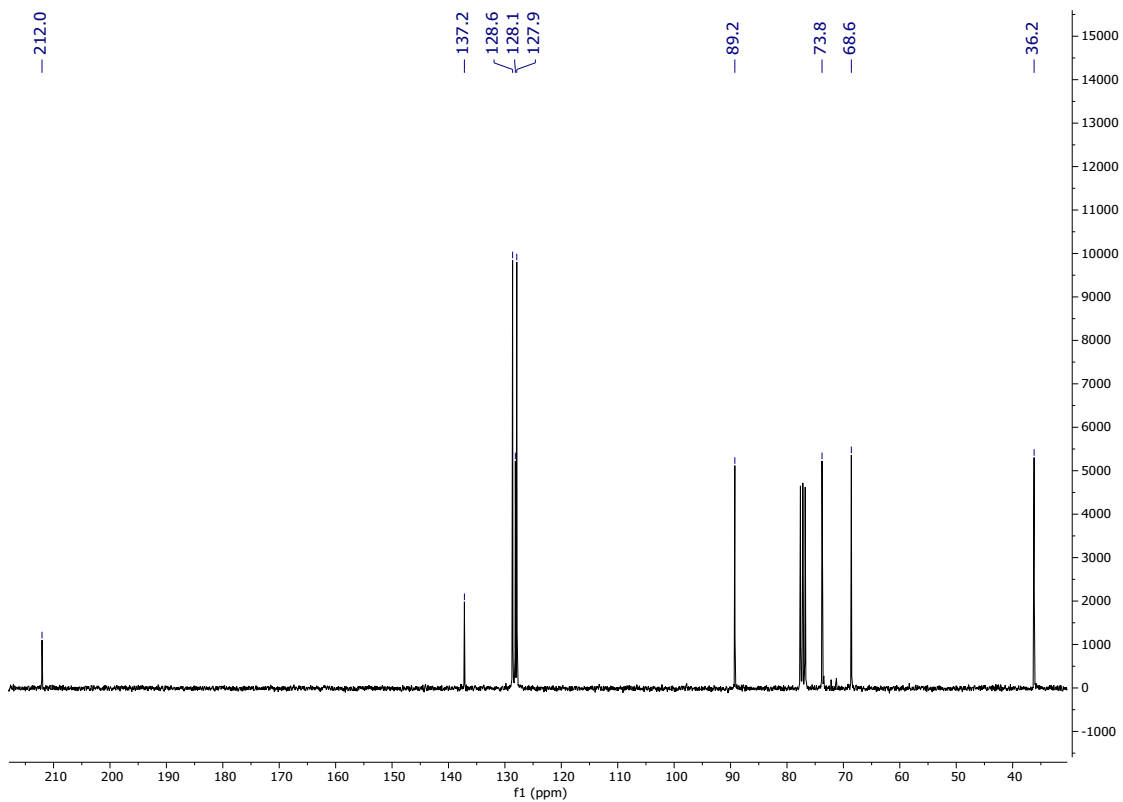

Figure SI\_37.  $^{13}\text{C}$ -NMR for **4i** in  $\text{CDCl}_3$  (75 MHz).

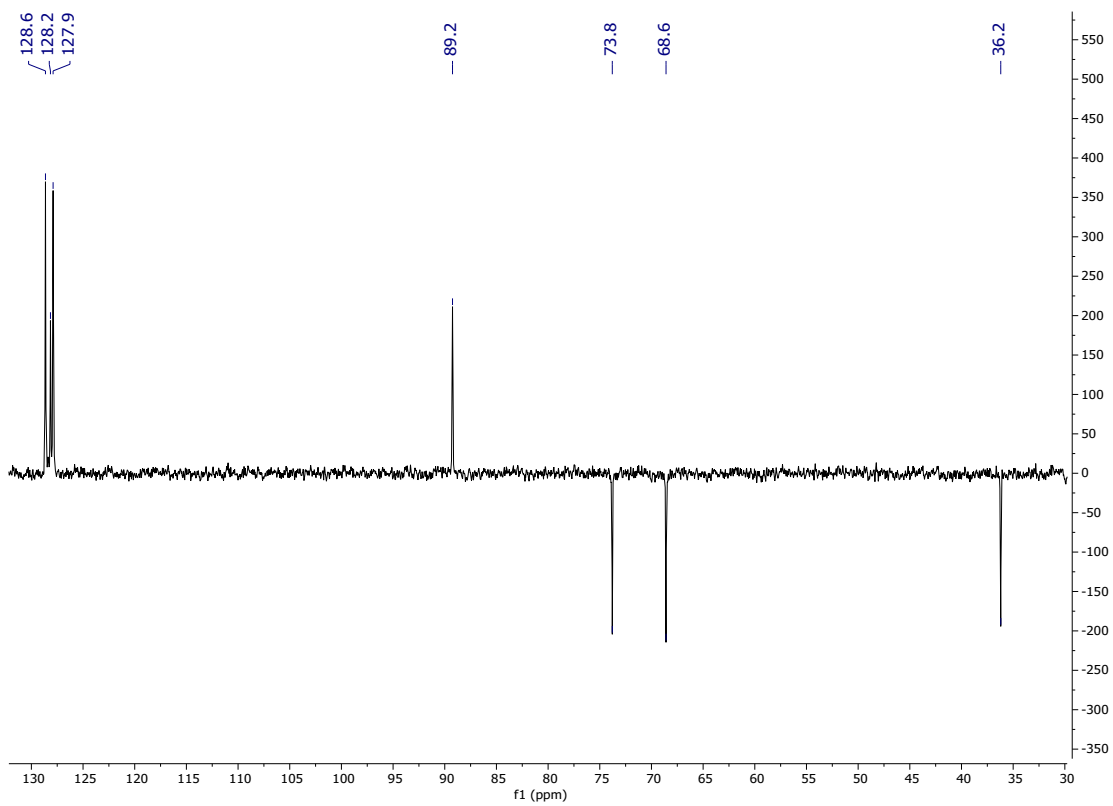

Figure SI\_38. DEPT-135 NMR for **4i** in  $\text{CDCl}_3$  (75 MHz).

### 5-((4-Methoxyphenoxy)methyl)-1,3-oxathiolane-2-thione (**4j**)

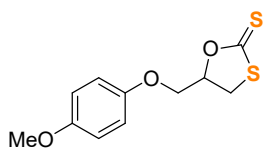

Prepared according to protocol **SP2**. Pale-yellow oil (165 mg, 73% yield). Purified by flash chromatography (Hexane/EtOAc, 4:1).  $^1\text{H}$  NMR (300 MHz,  $\text{CDCl}_3$ ):  $\delta$  = 6.89-6.82 (m, 4H), 5.46-5.38 (m, 1H), 4.31-4.22 (m, 2H), 3.84-3.70 (m, 5H).  $^{13}\text{C}$  NMR (75 MHz,  $\text{CDCl}_3$ ):  $\delta$  = 211.7 (C), 154.6 (C), 151.9 (C), 115.8 (2 $\times$ CH), 114.8 (2 $\times$ CH), 88.2 (CH), 67.3 ( $\text{CH}_2$ ), 55.8 ( $\text{CH}_3$ ), 36.2 ( $\text{CH}_2$ ).<sup>[6]</sup>

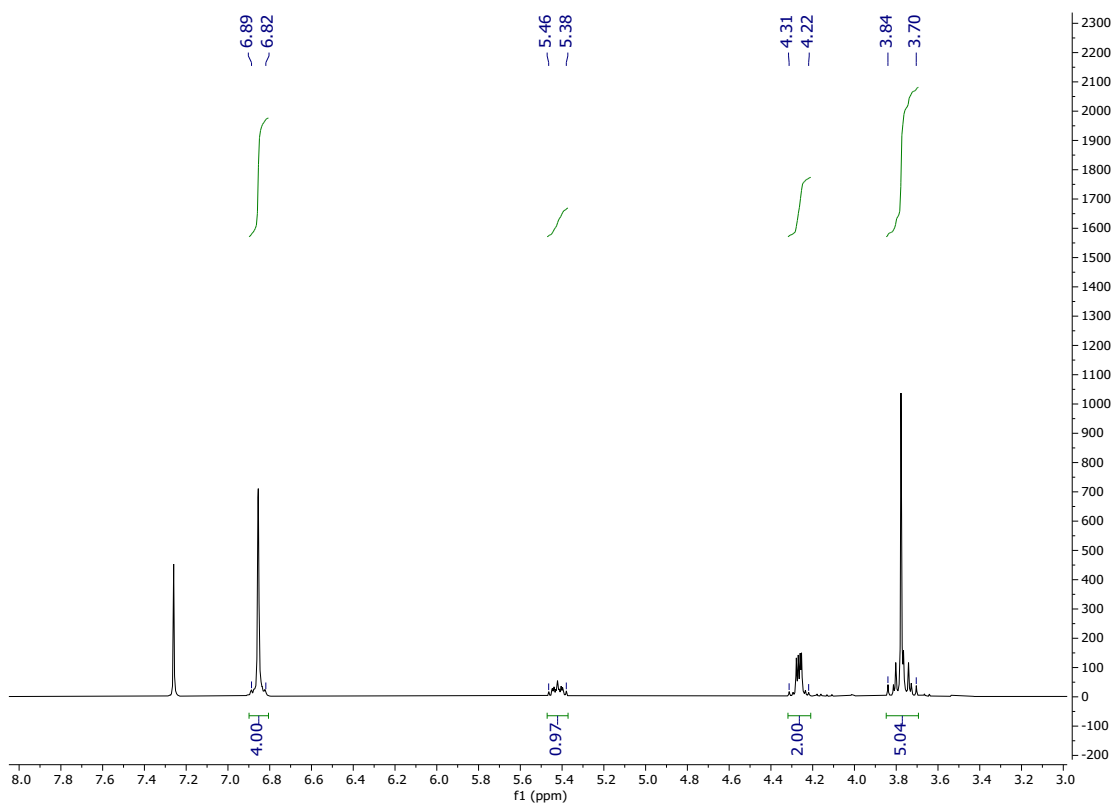

Figure SI\_39  $^1\text{H}$ -NMR for **4j** in  $\text{CDCl}_3$  (300 MHz).

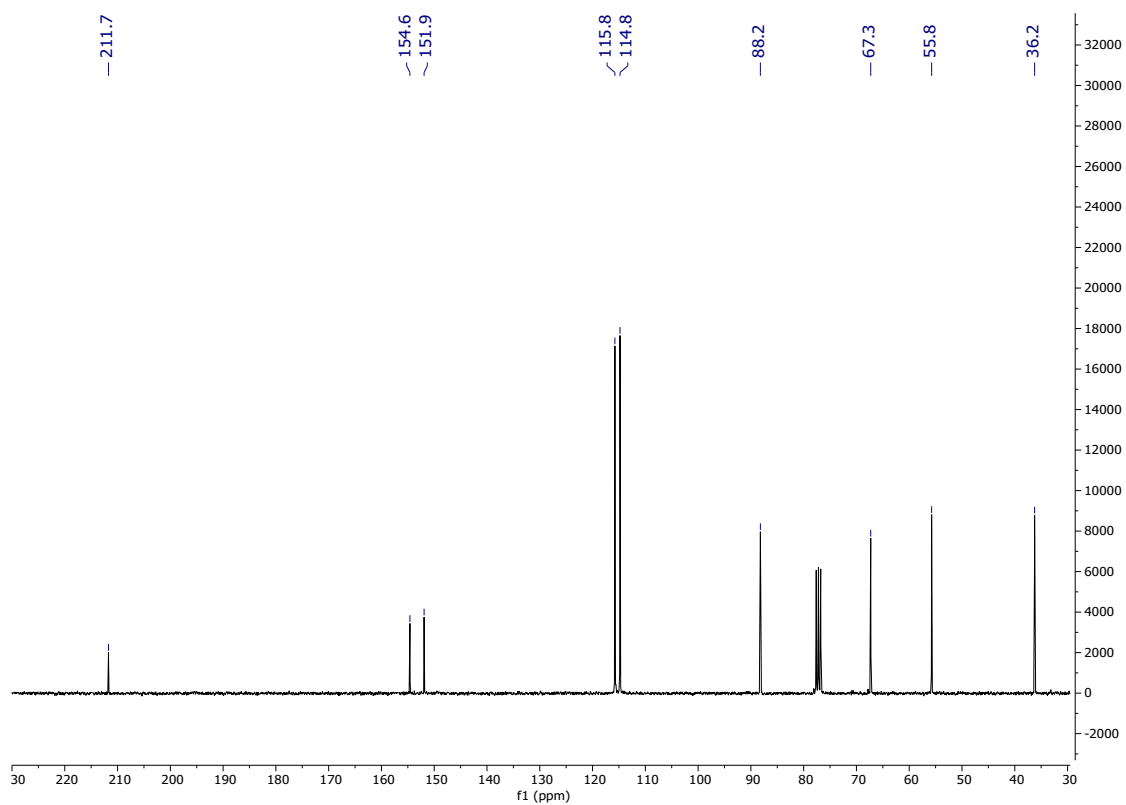

Figure SI\_40.  $^{13}\text{C}$ -NMR for **4j** in  $\text{CDCl}_3$  (75 MHz).

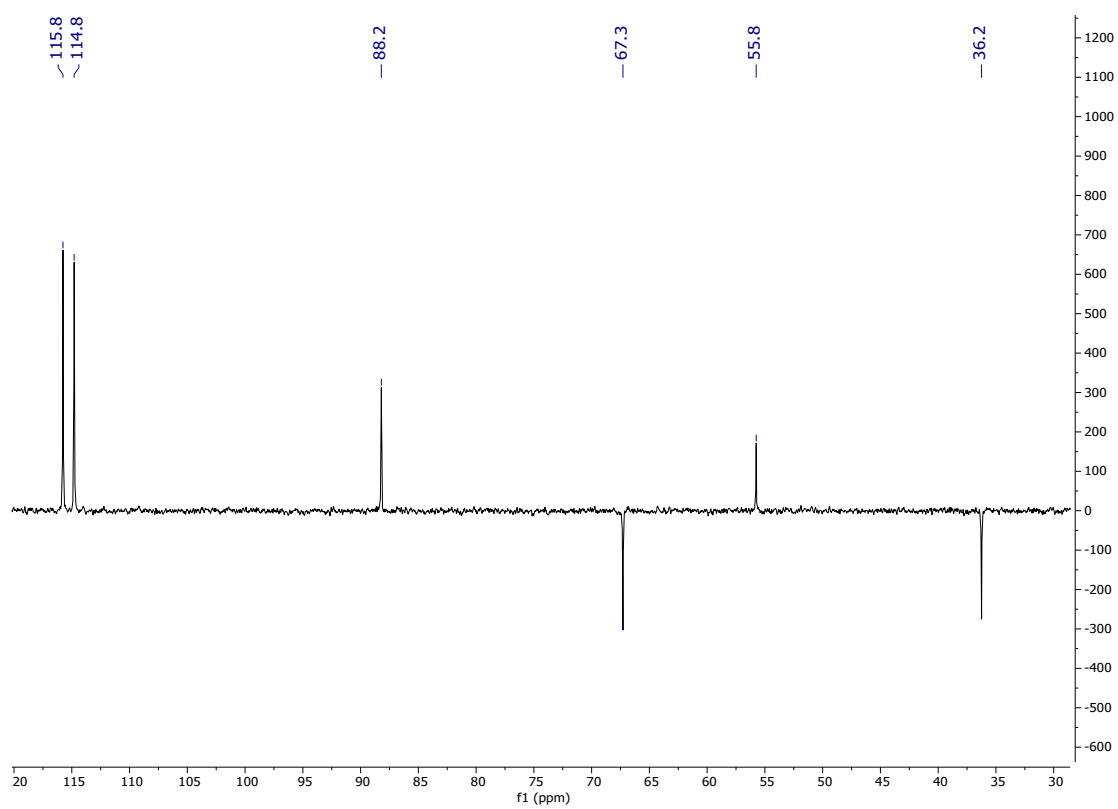

Figure SI\_41. DEPT-135 NMR for **4j** in  $\text{CDCl}_3$  (75 MHz).

### 5-(Phthalimidymethyl)-1,3-oxathiolane-2-thione (4k)

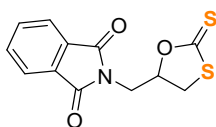

Prepared according to protocols **SP1** and **SP2**. Pale brown solid (128 mg, 52% and 175 mg, 71% yield respectively). Purified by flash chromatography (Hexane/EtOAc, 4:1, to EtOAc).  $^1\text{H}$  NMR (300 MHz,  $\text{CDCl}_3$ ):  $\delta$  = 7.91-7.87 (m, 2H), 7.80-7.74 (m, 2H), 5.48-5.39 (m, 1H), 4.27 (dd,  $J$  = 14.2, 6.7 Hz, 1H), 4.05 (dd,  $J$  = 14.2, 5.7 Hz, 1H), 3.73 (dd,  $J$  = 11.4, 7.0 Hz, 1H), 3.58 (dd,  $J$  = 11.4, 7.1 Hz, 1H).  $^{13}\text{C}$  NMR (75 MHz,  $\text{CDCl}_3$ ):  $\delta$  = 210.6 (C), 167.8 (2×C), 134.5 (2×CH), 131.6 (2×C), 123.8 (2×CH), 86.8 (CH), 39.5 ( $\text{CH}_2$ ), 37.4 ( $\text{CH}_2$ ).<sup>[10]</sup>

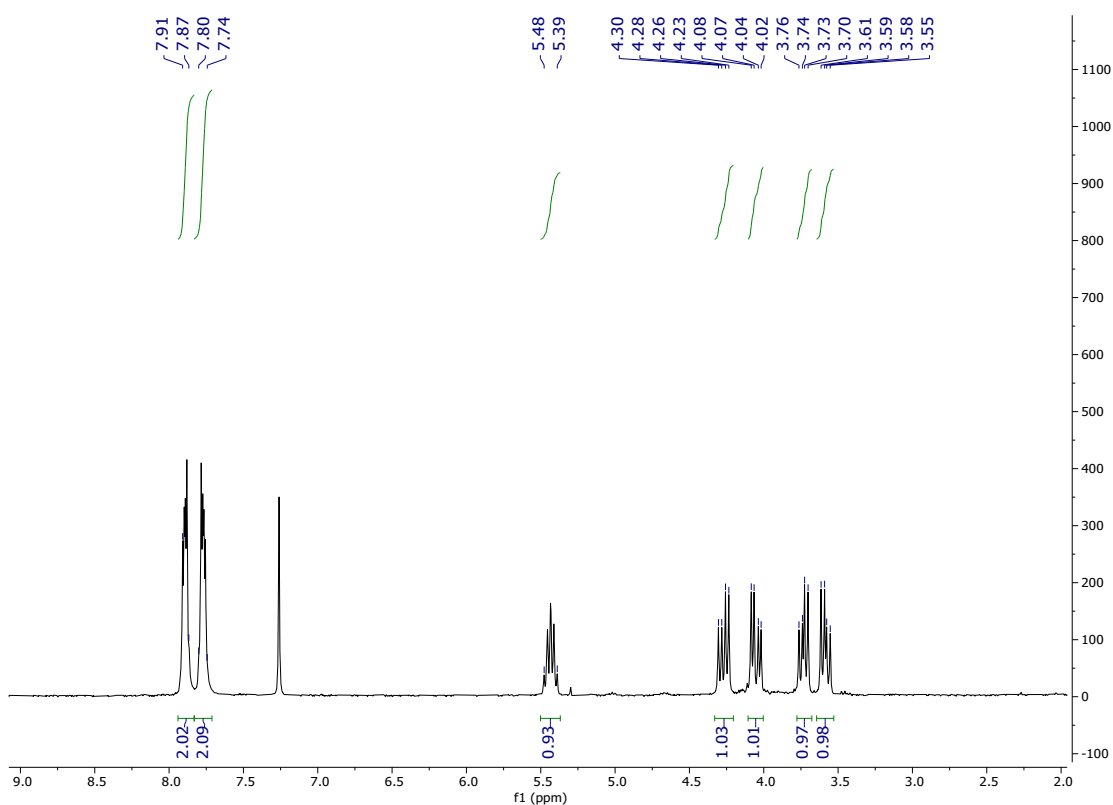

Figure SI\_42.  $^1\text{H}$ -NMR for **4k** in  $\text{CDCl}_3$  (300 MHz).

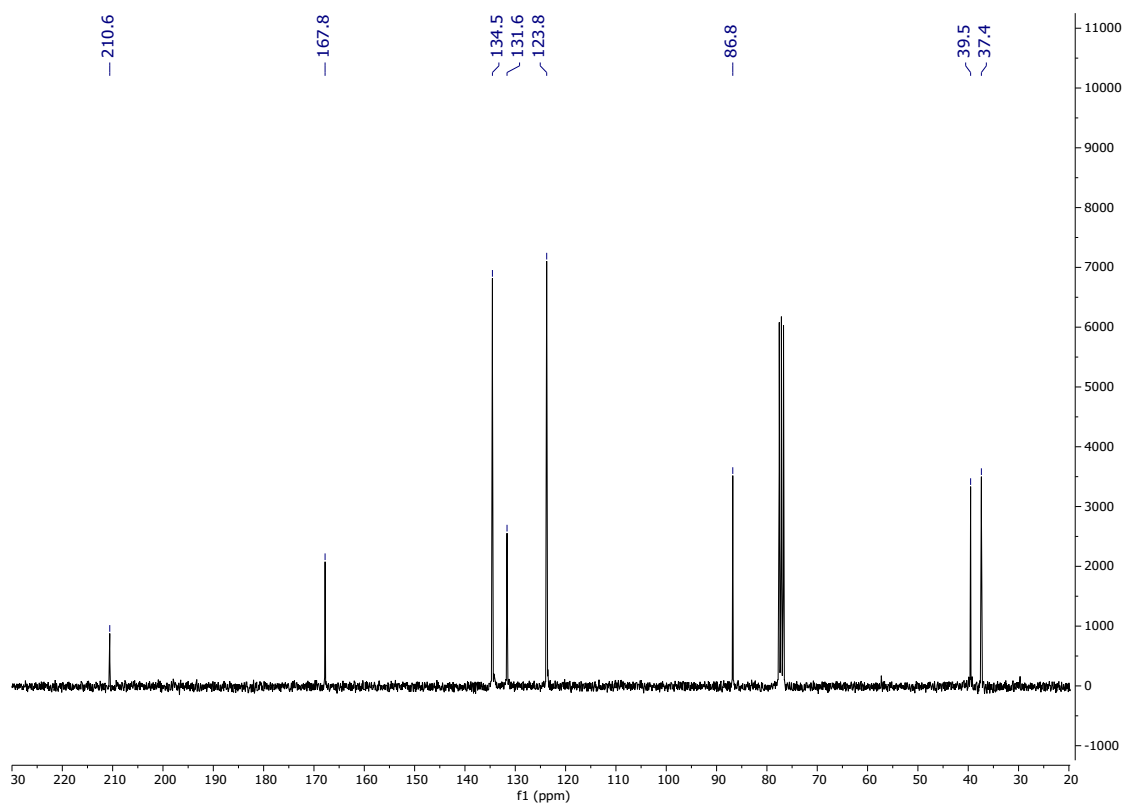

Figure SI\_43.  $^{13}\text{C}$ -NMR for **4k** in  $\text{CDCl}_3$  (75 MHz).

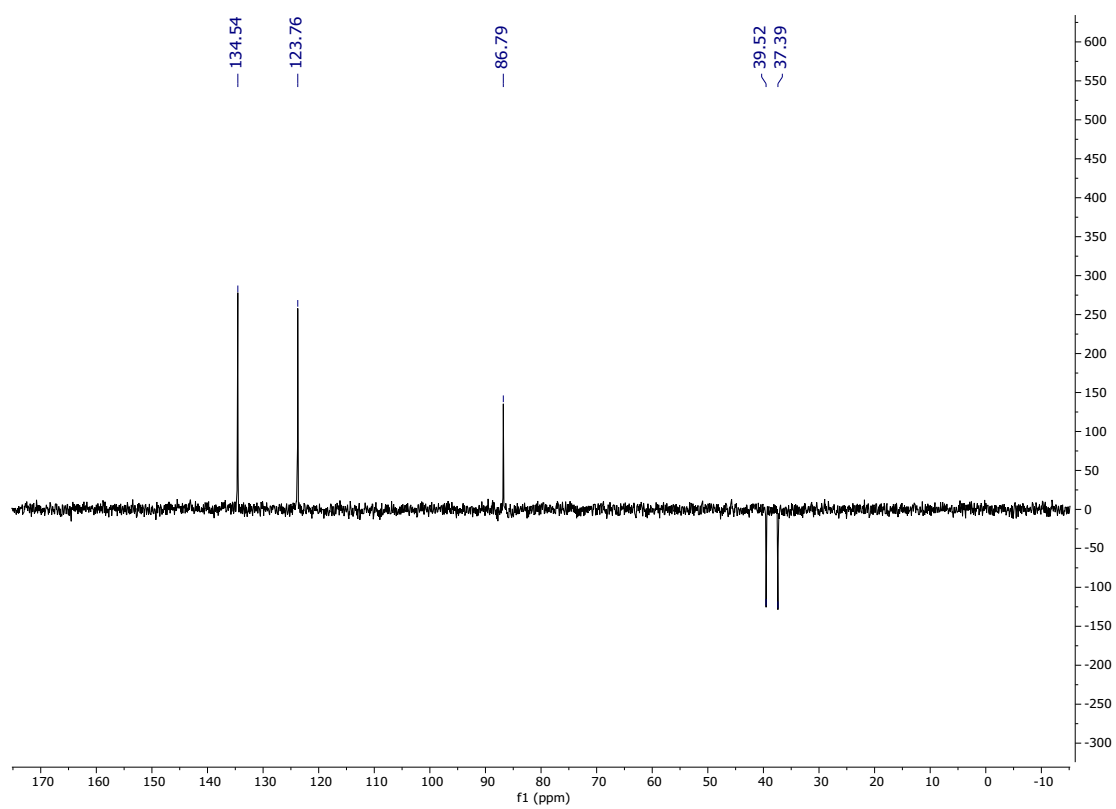

Figure SI\_44. DEPT-135 NMR for **4k** in  $\text{CDCl}_3$  (75 MHz).

## 6. SYNTHESIS AND CHARACTERISATION OF BIS-THIOESTER 3

Product **3** was prepared according to the following synthetic sequence:

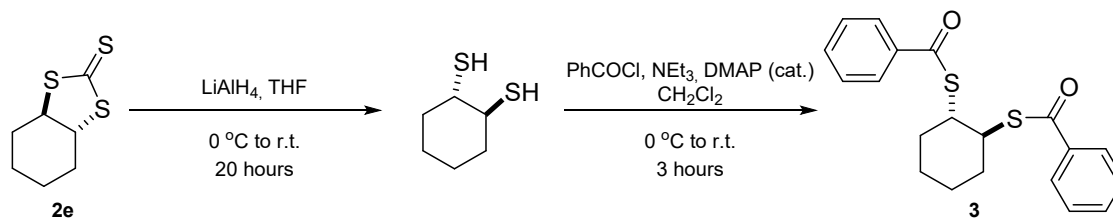

A solution of compound **2e** (167 mg, 0.88 mmol, 1 equiv.) in dry THF (5 mL) was cooled to  $0\text{ }^\circ\text{C}$  and  $\text{LiAlH}_4$  (42 mg, 1.1 mmol, 5 equiv.) was carefully added by portions during 15 min. The resulting solution was stirred for 20 h at room temperature and then the reaction was quenched with HCl 6N at  $0\text{ }^\circ\text{C}$  (the aqueous solution was dropped until no effervescence was observed). Salts were filtered off through Celite®, and the filtrate washed with EtOAc (2 x 5 mL). Organic phases were combined, dried over  $\text{Na}_2\text{SO}_4$  and the solvent evaporated under reduced pressure, obtaining a reaction crude that was purified by flash chromatography (Hex:EtOAc, 99:1). *trans*-1,2-Cyclohexanedithiol was afforded as a colourless oil (67 mg, 51% yield).  $^1\text{H}$  NMR (300 MHz,  $\text{CDCl}_3$ ):  $\delta = 2.75$ - $2.64$  (m, 2H),  $2.23$ - $2.15$  (m, 2H),  $2.00$  (d,  $J = 5.9$  Hz, 2H),  $1.78$ - $1.73$  (m, 2H),  $1.48$ - $1.29$  (m, 4H).  $^{13}\text{C}$  NMR (75 MHz,  $\text{CDCl}_3$ ):  $48.3$  ( $2\times\text{CH}$ ),  $36.9$  ( $2\times\text{CH}_2$ ),  $26.5$  ( $2\times\text{CH}_2$ ).<sup>[17]</sup>

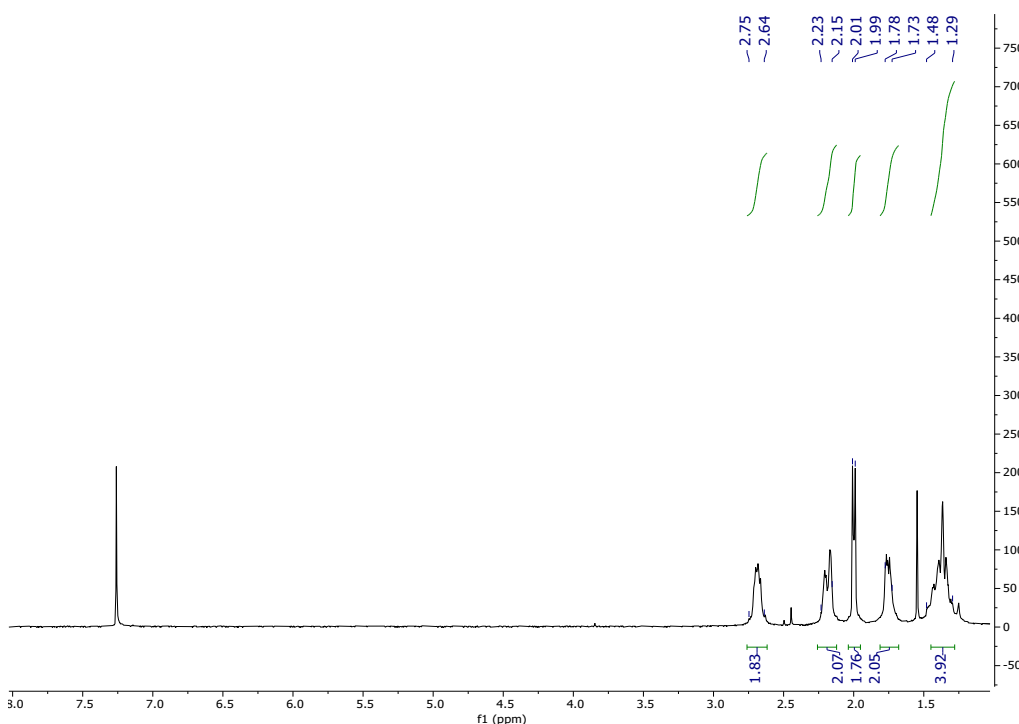

**Figure SI\_45.**  $^1\text{H}$ -NMR for *trans*-1,2-cyclohexanedithiol in  $\text{CDCl}_3$  (300 MHz).

[12] J. Houk, G. M. Whitesides, *J. Am. Chem. Soc.*, 1987, **109**, 6825.



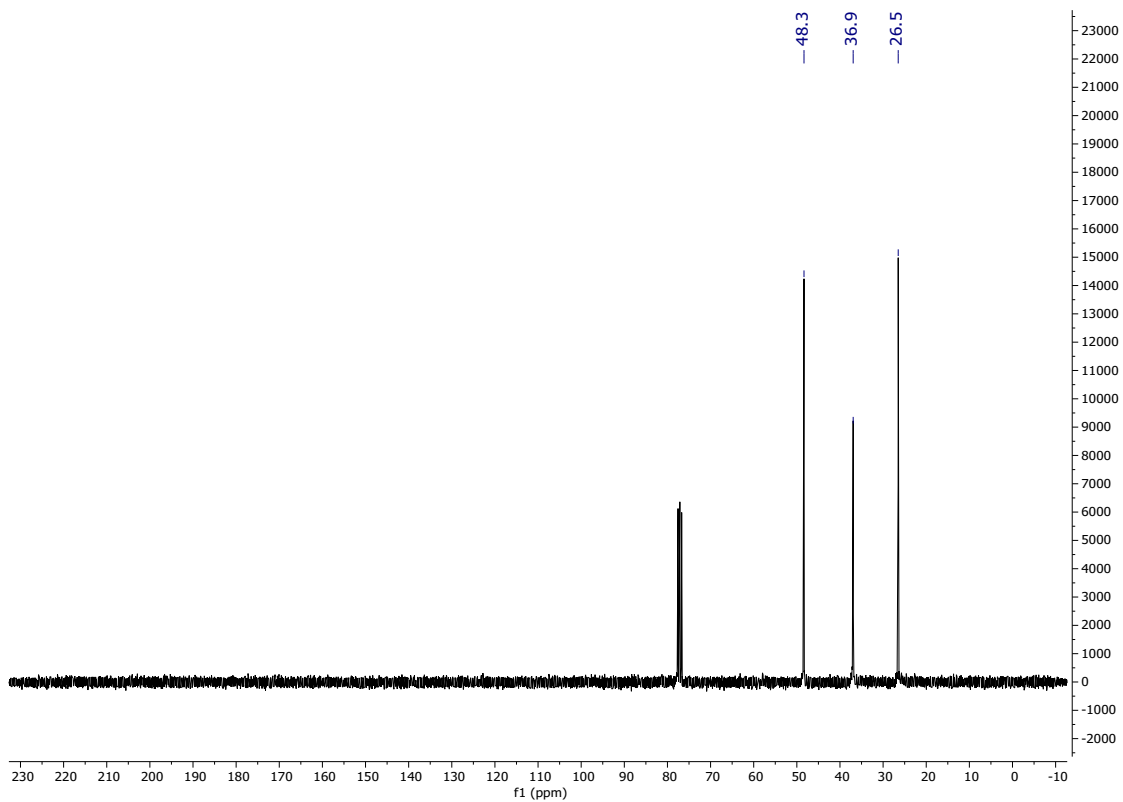

Figure SI\_46.  $^{13}\text{C}$ -NMR for *trans*-1,2-cyclohexanedithiol in  $\text{CDCl}_3$  (75 MHz).

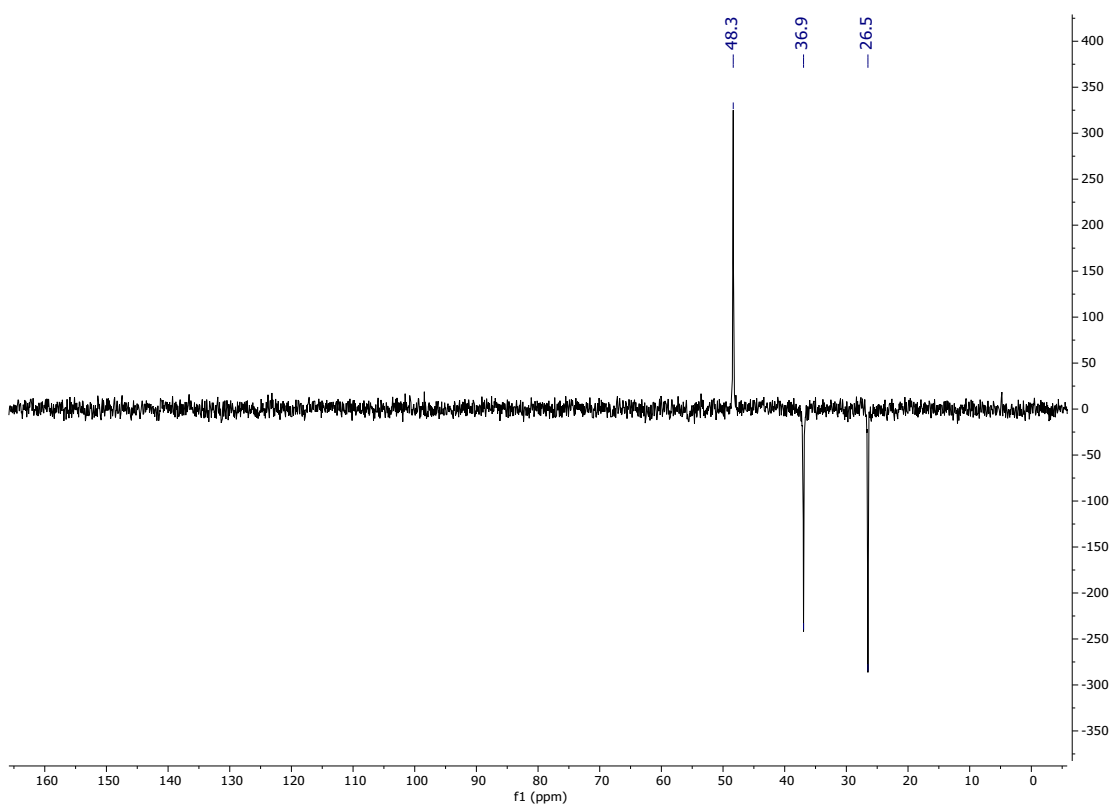

Figure SI\_47. DEPT-135 NMR for *trans*-1,2-cyclohexanedithiol in  $\text{CDCl}_3$  (75 MHz).

### ***trans*-(Cyclohexane-1,2-diyl)-dibenzothioate (3)**

To a solution of *trans*-1,2-cyclohexanedithiol (33 mg, 0.22 mmol) in dry CH<sub>2</sub>Cl<sub>2</sub> (2 mL), dry Et<sub>3</sub>N (368 μL, 2.64 mmol, 6 equiv.) and DMAP (27 mg, 0.22 mg, 0.5 equiv.) were successively added under argon atmosphere and the resulting mixture was cooled to 0 °C. Then, benzoyl chloride (154 μL, 1.32 mmol, 3 equiv.) was added dropwise and the reaction mixture stirred for 3 h at room temperature. Sequently, the crude was diluted with 10 mL of CH<sub>2</sub>Cl<sub>2</sub> and quenched with 10 mL 1N HCl, the phases were separated and the aqueous phase extracted with CH<sub>2</sub>Cl<sub>2</sub> (3 x 10 mL). Organic phases were combined, dried over Na<sub>2</sub>SO<sub>4</sub> and the solvent evaporated under reduced pressure, obtaining a reaction crude that was purified by flash chromatography (Hex:EtOAc, 30:1), affording *trans*-(cyclohexane-1,2-diyl)-dibenzothioate **3** as a white solid (59 mg, 75% yield). The product was crystallized for X-Ray analysis from THF/Hexanes. <sup>1</sup>H NMR (300 MHz, CDCl<sub>3</sub>): δ = 7.98-7.94 (m, 4H), 7.56 (t, *J* = 7.3 Hz, 2H), 7.43 (t, *J* = 7.6 Hz, 4H), 3.97-3.95 (m, 2H), 2.30-2.26 (m, 2H), 1.86-1.70 (m, 4H), 1.62-1.54 (m, 2H + H<sub>2</sub>O). <sup>13</sup>C NMR (75 MHz, CDCl<sub>3</sub>): δ = 191.0 (2×C=O), 137.0 (2×C), 133.3 (2×CH), 128.6 (4×CH), 127.3 (4×CH), 46.4 (2×CH), 33.7 (2×CH<sub>2</sub>), 25.3 (2×CH<sub>2</sub>). HMRS (ESI<sup>+</sup>) calculated for C<sub>20</sub>H<sub>20</sub>NaO<sub>2</sub>S<sub>2</sub> [(M+Na)<sup>+</sup>]: 379.0797; found: 379.0784.

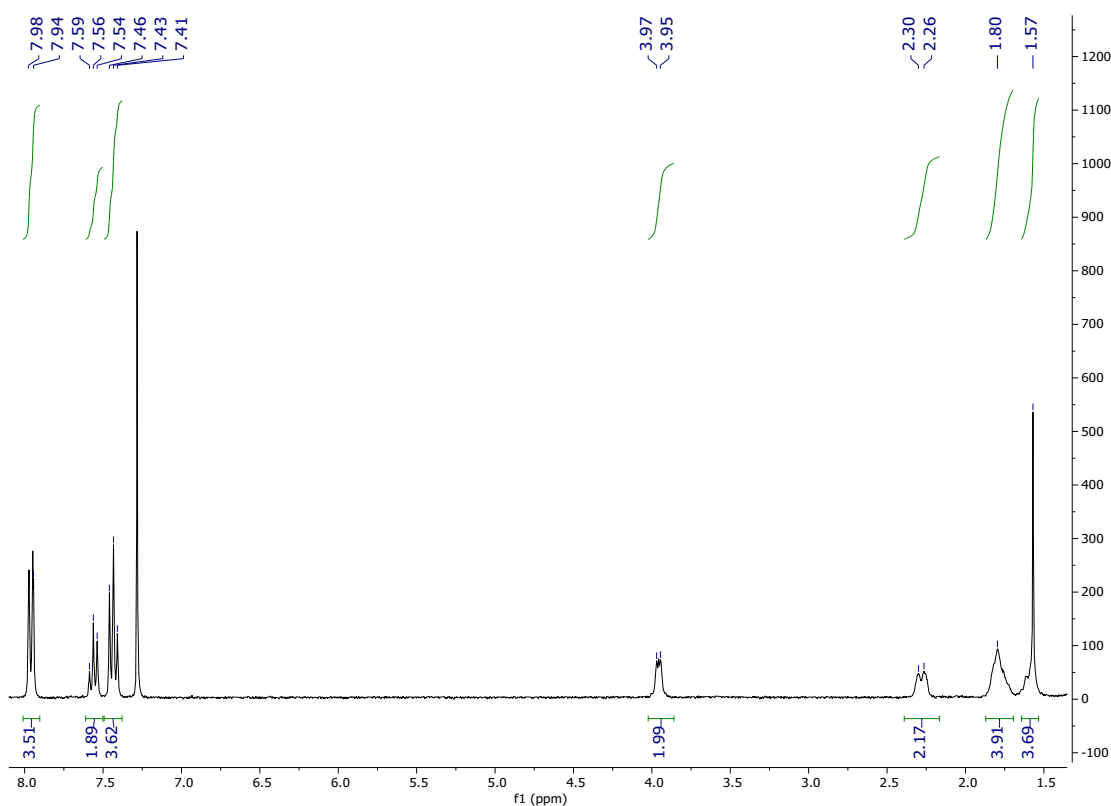

**Figure SI\_48.** <sup>1</sup>H-NMR for **3** in CDCl<sub>3</sub> (300 MHz).

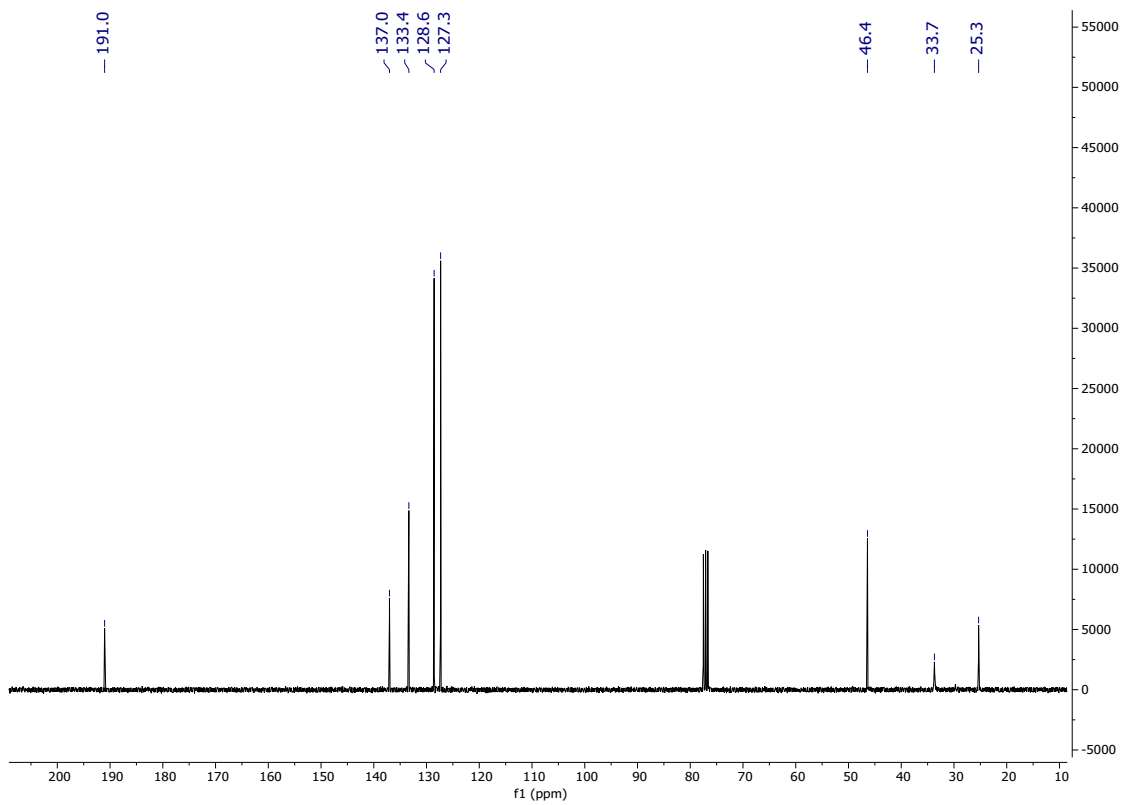

Figure SI\_49.  $^{13}\text{C}$ -NMR for **3** in  $\text{CDCl}_3$  (75 MHz).

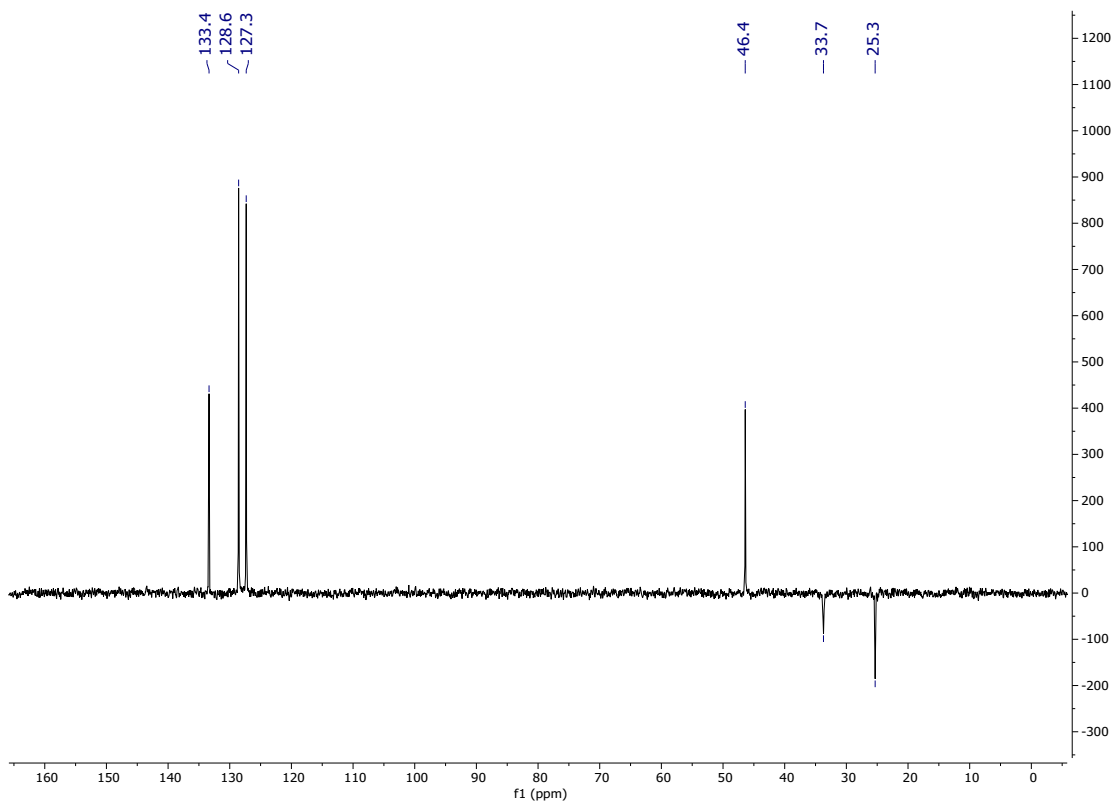

Figure SI\_50. DEPT-135 NMR for **3** in  $\text{CDCl}_3$  (75 MHz).

**Acquisition Parameter**

|             |          |                      |          |                  |           |
|-------------|----------|----------------------|----------|------------------|-----------|
| Source Type | ESI      | Ion Polarity         | Positive | Set Nebulizer    | 2.4 Bar   |
| Focus       | Active   | Set Capillary        | 4000 V   | Set Dry Heater   | 250 °C    |
| Scan Begin  | 50 m/z   | Set End Plate Offset | -500 V   | Set Dry Gas      | 6.0 l/min |
| Scan End    | 1500 m/z | Set Charging Voltage | 2000 V   | Set Divert Valve | Source    |
|             |          | Set Corona           | 0 nA     | Set APCI Heater  | 0 °C      |

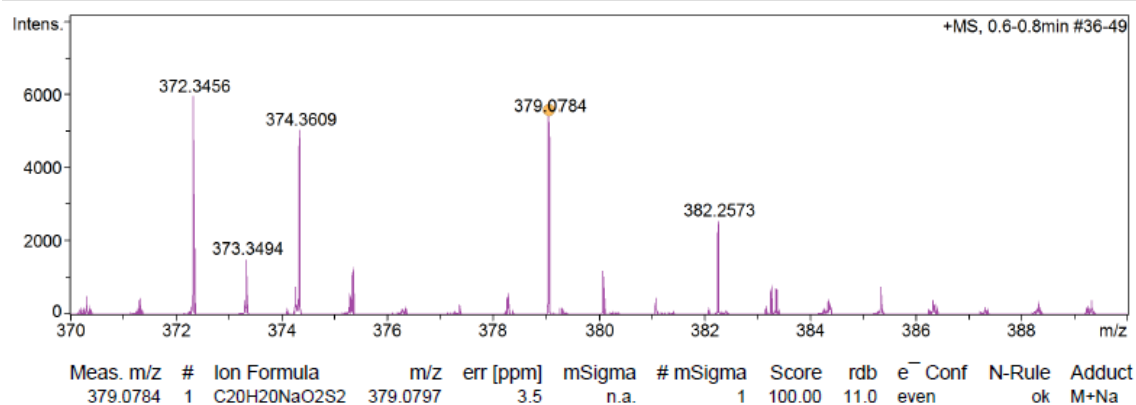

Figure SI\_51. HRMS (ESI<sup>+</sup>) spectrum for **3**.

## 7. HPLC ANALYSIS FOR DETERMINATION OF ENANTIOMERIC EXCESS

Optical purity of **2i** was measured by HPLC on a chiralcel OJ-H column (hexane/2-propanol 75:25), flow rate 0.8 mL/min, 40°C. The absolute configuration was assigned comparing the experimental specific rotation values obtained with those reported in the literature values.<sup>[10]</sup>

Experimental:  $[\alpha]_D^{19} = +142.0$  (c=0.5, CHCl<sub>3</sub>), for >99% ee.

Literature:  $[\alpha]_D^{28} = +154.3$  (c=0.7, CHCl<sub>3</sub>), for 98% ee of (*R*)-enantiomer.

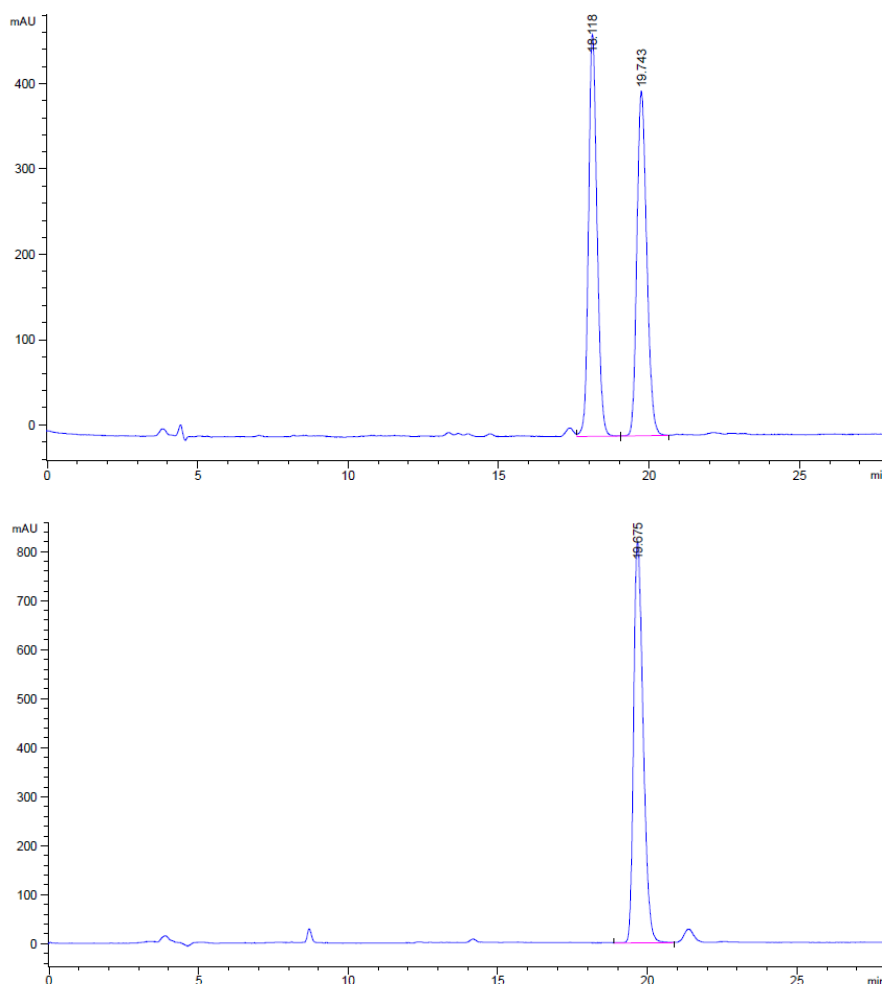

**Figure SI\_52.** HPLC chromatograms for ( $\pm$ )-**2i** and (*R*)-**2i**, obtained after purification.

Optical purity of **4i** was measured by HPLC on a chiralcel AD-H column (hexane/2-propanol 95:5), flow rate 0.8 mL/min, 40°C. The absolute configuration was assigned comparing the experimental specific rotation values obtained with those reported in the literature values.<sup>[10]</sup>

Experimental:  $[\alpha]_D^{19} = +37.9$  (c=1, CHCl<sub>3</sub>), for >99% ee

Literature:  $[\alpha]_D^{27} = +39.6$  (c=1.3, CHCl<sub>3</sub>), for 99% ee of (S)-enantiomer.

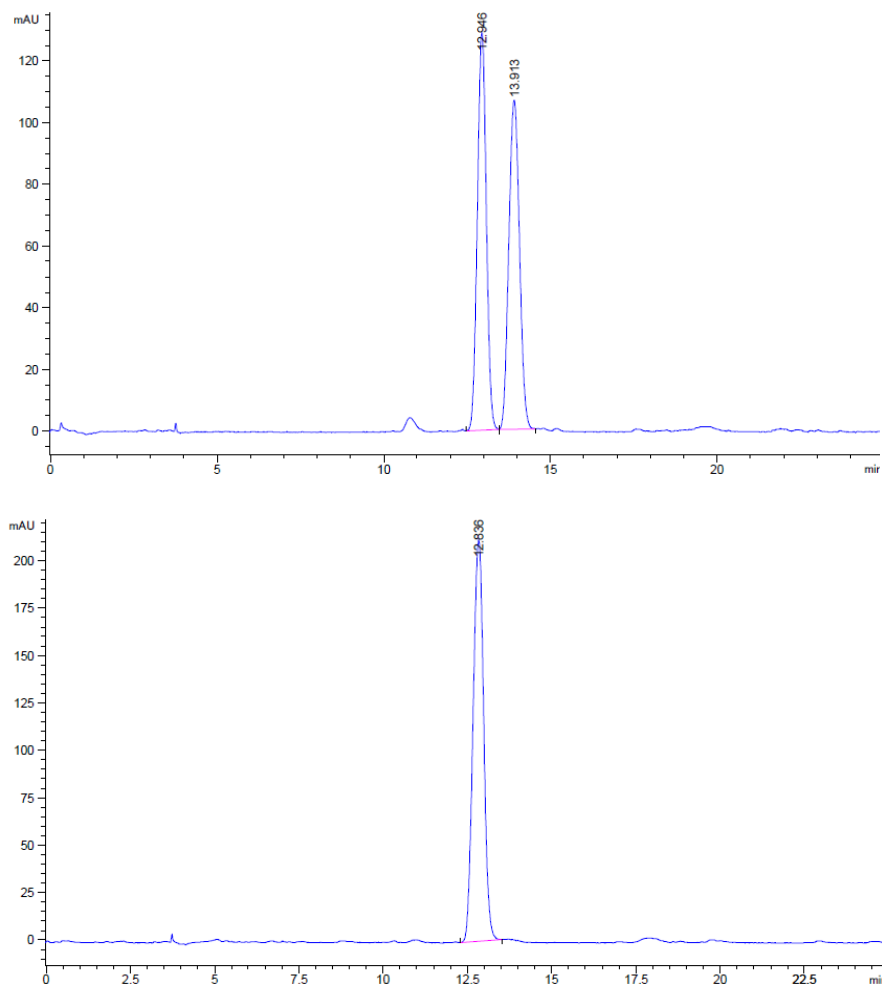

**Figure SI\_53.** HPLC chromatograms for ( $\pm$ )-**4i** and (S)-**4i**, obtained after purification.

## 8. X-RAY ANALYSIS

Crystals of **2f**, **2g** and **3** were analysed by X-ray diffraction. A selection of crystal, measurement and refinement data is given in Table SI\_10. Diffraction data were collected on a Oxford Diffraction Xcalibur Onyx Nova Gemini single crystal diffractometer. Empirical absorption corrections were applied using the SCALE3 ABSPACK algorithm as implemented in Chrysalis RED.<sup>[18]</sup> The structures were solved with SIR-2019.<sup>[19]</sup> Isotropic and full matrix anisotropic least square refinements were carried out using SHELXL.<sup>[20]</sup> All non-H atoms were refined anisotropically. All H atoms were set in calculated positions and were refined riding on their parent atoms. One of the two molecules found in the asymmetric unit of **2f** was partially disordered over two positions with a 54:46 occupancy ratio, requiring restraints on its geometrical and thermal parameters. The WINGX program system <sup>[21]</sup> was used throughout the structure determinations. The molecular plots were made with MERCURY.<sup>[22]</sup> The X-ray crystallographic coordinates for structures reported in this study have been deposited at the Cambridge Crystallographic Data Centre (CCDC) under deposition numbers 2386775–2386777 for **2f**, **2g** and **3**, respectively. These data can be obtained free of charge via [http://www.ccdc.cam.ac.uk/data\\_request/cif](http://www.ccdc.cam.ac.uk/data_request/cif)

---

[18] *CrysAlisPro RED*, version 1.171.38.46: Oxford Diffraction Ltd., Oxford, UK, 2015.

[19] *SIR-2019*: Burla, M. C.; Caliandro, R.; Carrozzini, B.; Cascarano, G. L.; Cuocci, C.; Giacovazzo, C.; Mallamo, M.; Mazzone, A.; Polidori, G. Crystal structure determination and refinement via SIR2014. *J. Appl. Crystallogr.* 2015, **48**, 306.

[20] *SHELXL-2018*: Sheldrick, G. M. A short history of SHELX. *Acta Cryst.* 2008, **A64**, 112.

[21] *WINGX*, version 2021.3: Farrugia, L. WinGX and ORTEP for Windows: an update. *J. Appl. Crystallogr.* 2012, **45**, 849.

[22] *MERCURY*, version 2024.1.0 (build 401958): Cambridge Crystallographic Data Centre, Cambridge, UK, 2024.

**Table SI\_10.** Crystal, measurement and refinement data for the compounds studied by X-ray diffraction.

|                                                                          | <b>2f</b>                                                     | <b>2g</b>                                       | <b>3</b>                                                      |
|--------------------------------------------------------------------------|---------------------------------------------------------------|-------------------------------------------------|---------------------------------------------------------------|
| formula                                                                  | C <sub>14</sub> H <sub>20</sub> O <sub>2</sub> S <sub>6</sub> | C <sub>14</sub> H <sub>16</sub> OS <sub>3</sub> | C <sub>20</sub> H <sub>20</sub> O <sub>2</sub> S <sub>2</sub> |
| fw                                                                       | 412.66                                                        | 296.45                                          | 356.48                                                        |
| cryst syst                                                               | triclinic                                                     | monoclinic                                      | monoclinic                                                    |
| space group                                                              | <i>P</i> -1                                                   | <i>P</i> 21/ <i>c</i>                           | <i>C</i> 2/ <i>c</i>                                          |
| <i>a</i> , Å                                                             | 7.5479(4)                                                     | 12.7687(3)                                      | 23.7180(5)                                                    |
| <i>b</i> , Å                                                             | 11.0961(8)                                                    | 8.3272(2)                                       | 5.8719(1)                                                     |
| <i>c</i> , Å                                                             | 12.0292(8)                                                    | 14.0444(4)                                      | 27.5681(5)                                                    |
| $\alpha$ , deg                                                           | 103.921(6)                                                    | 90                                              | 90                                                            |
| $\beta$ , deg                                                            | 97.793(5)                                                     | 103.571(3)                                      | 106.489(2)                                                    |
| $\gamma$ , deg                                                           | 98.661(5)                                                     | 90                                              | 90                                                            |
| <i>V</i> , Å <sup>3</sup>                                                | 951.1(1)                                                      | 1451.61(7)                                      | 3681.50(13)                                                   |
| <i>Z</i>                                                                 | 2                                                             | 4                                               | 8                                                             |
| <i>F</i> (000)                                                           | 432                                                           | 624                                             | 1504                                                          |
| <i>D</i> <sub>calcd</sub> , g cm <sup>-3</sup>                           | 1.441                                                         | 1.356                                           | 1.286                                                         |
| $\mu$ , mm <sup>-1</sup> (CuK $\alpha$ )                                 | 6.666                                                         | 4.542                                           | 2.686                                                         |
| cryst size, mm                                                           | 0.26 x 0.17 x 0.14                                            | 0.40 x 0.25 x 0.16                              | 0.35 x 0.23 x 0.18                                            |
| <i>T</i> , K                                                             | 297(2)                                                        | 297(2)                                          | 297(2)                                                        |
| $\theta$ range, deg                                                      | 3.85 to 69.52                                                 | 3.56 to 69.43                                   | 3.34 to 69.65                                                 |
| min./max. <i>h</i> , <i>k</i> , <i>l</i>                                 | -9/8, -11/13, -14/14                                          | -15/15, -10/8, -17/15                           | -28/28, -7/7, -29/33                                          |
| no. collected reflns                                                     | 10237                                                         | 10722                                           | 15871                                                         |
| no. unique reflns                                                        | 3533                                                          | 2709                                            | 3431                                                          |
| no. reflns with <i>I</i> > 2 $\sigma$ ( <i>I</i> )                       | 2668                                                          | 2362                                            | 3226                                                          |
| no. params/restraints                                                    | 281/98                                                        | 163/0                                           | 218/0                                                         |
| GOF (on <i>F</i> <sup>2</sup> )                                          | 1.053                                                         | 1.074                                           | 1.094                                                         |
| <i>R</i> <sub>1</sub> (on <i>F</i> , <i>I</i> > 2 $\sigma$ ( <i>I</i> )) | 0.053                                                         | 0.045                                           | 0.037                                                         |
| <i>wR</i> <sub>2</sub> (on <i>F</i> <sup>2</sup> , all data)             | 0.163                                                         | 0.125                                           | 0.108                                                         |
| min./max. $\Delta\rho$ , e Å <sup>-3</sup>                               | -0.370/0.444                                                  | -0.314/0.342                                    | -0.285/0.196                                                  |
| CCDC dep. no.                                                            | 2386775                                                       | 2386777                                         | 2386776                                                       |



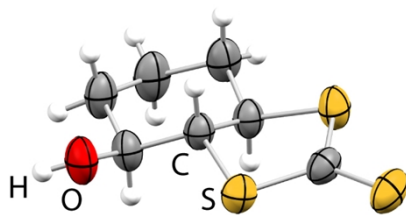

**Figure SI\_54.** SCXRD molecular structure of **2f** (30% displacement ellipsoids; only the non-disorder molecule of the two found in the asymmetric unit is shown).

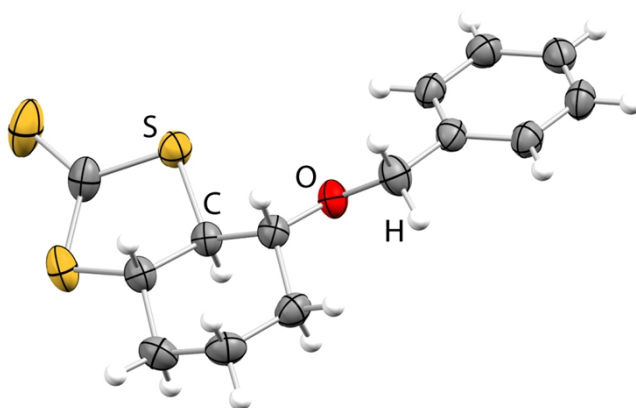

**Figure SI\_55.** SCXRD molecular structure of **2g** (30% displacement ellipsoids).

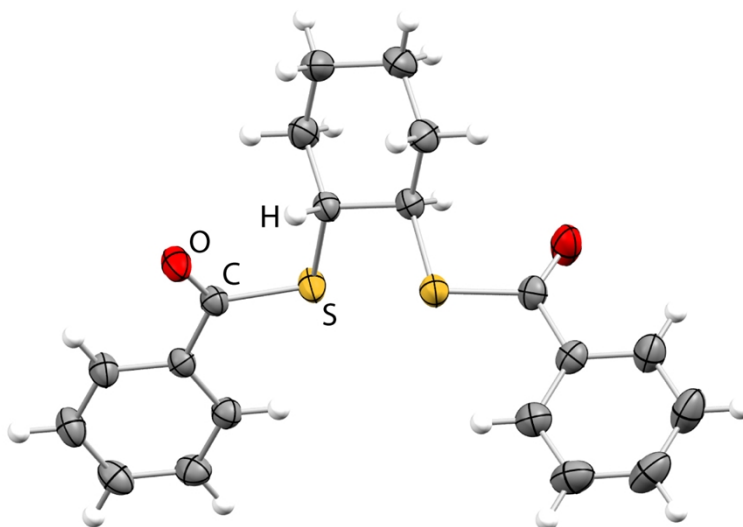

**Figure SI\_56.** SCXRD molecular structure of **3** (30% displacement ellipsoids)

## 9. IR ANALYSIS

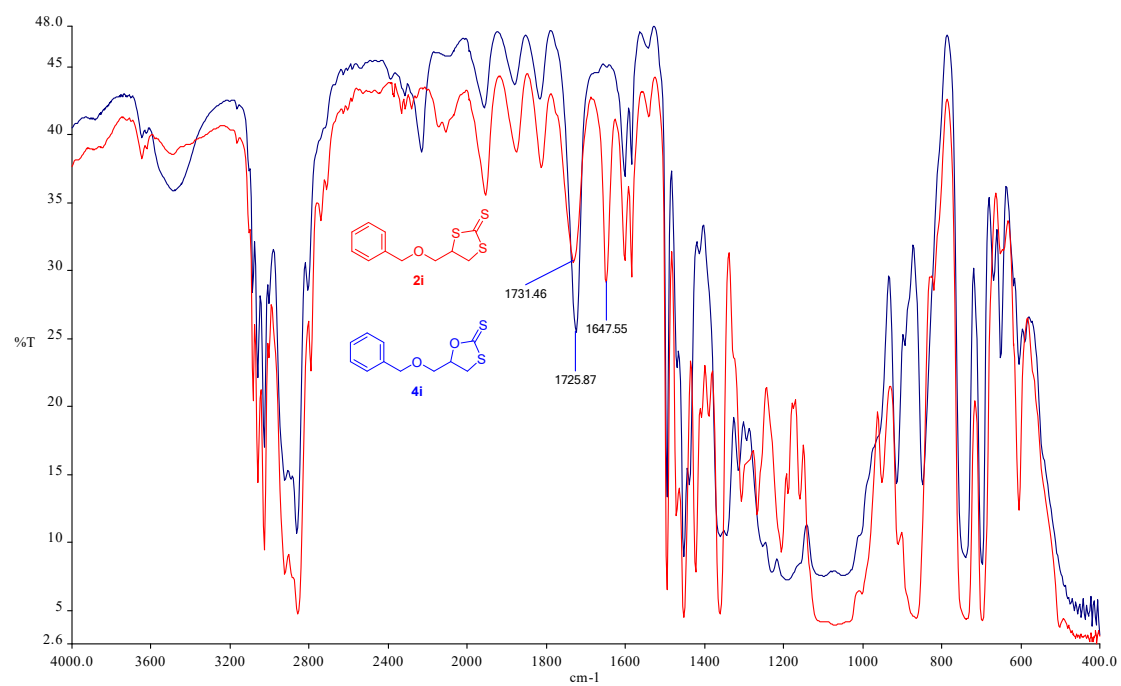

**Figure SI\_57.** Overlay IR spectra for trithiocarbonate **2i** (red line) and dithiocarbonate **4i** (blue line)
